# Supplementary material for: Exploring the role of macromolecular crowding and TNFR1 in cell volume control
Source: eLife journal article supplement (doi:10.7554/elife.92719), 2024-09-19
Supplement: fig1-data1 [file elife-92719-fig1-data1-v2.zip]

## Sheet: Sheet1
RAW					FIT
Time	rEGFP	rEGFP	rEGFP		rEGFP	rEGFP	rEGFP
ns
	BSA0mM	BSA2.26mM	BSA4.52mM		0 mM	2.26 mM	4.52 mM
0	0.38175	0.3844	0.40094		0.38792	0.38778	0.40141
0.02585	0.38105	0.38497	0.40188		0.3873	0.38741	0.40121
0.05171	0.38063	0.38542	0.40256		0.38699	0.38722	0.40111
0.07756	0.38051	0.38573	0.403		0.38669	0.38704	0.40101
0.10342	0.38068	0.38591	0.40319		0.38653	0.38694	0.40096
0.12927	0.38115	0.38597	0.40313		0.38608	0.38666	0.40081
0.15513	0.38236	0.38753	0.40196		0.38607	0.38666	0.40081
0.18098	0.38359	0.38598	0.40064		0.38561	0.38638	0.40066
0.20684	0.38344	0.38528	0.40106		0.38547	0.38629	0.40061
0.23269	0.38496	0.38214	0.40325		0.38516	0.3861	0.40051
0.25855	0.3803	0.38039	0.4025		0.38486	0.38592	0.40041
0.2844	0.37941	0.37861	0.40122		0.3847	0.38582	0.40036
0.31026	0.37724	0.37687	0.40256		0.38426	0.38555	0.40021
0.33611	0.37318	0.37763	0.40415		0.38424	0.38554	0.40021
0.36197	0.37359	0.37806	0.40318		0.38379	0.38526	0.40006
0.38782	0.37234	0.37622	0.40004		0.38365	0.38518	0.40001
0.41368	0.3732	0.3773	0.40014		0.38333	0.38498	0.39991
0.43953	0.37351	0.37961	0.39797		0.38305	0.38481	0.39981
0.46539	0.3744	0.38242	0.40134		0.38288	0.38471	0.39976
0.49124	0.37452	0.38239	0.40286		0.38245	0.38444	0.39961
0.5171	0.37109	0.38455	0.40164		0.38243	0.38443	0.39961
0.54295	0.37032	0.38608	0.40024		0.38198	0.38415	0.39946
0.56881	0.36731	0.38623	0.39909		0.38185	0.38408	0.39942
0.59466	0.36645	0.38608	0.39637		0.38153	0.38388	0.39931
0.62052	0.36582	0.38558	0.39428		0.38125	0.38371	0.39922
0.64637	0.36717	0.38172	0.39342		0.38108	0.3836	0.39916
0.67223	0.36804	0.38098	0.3947		0.38066	0.38334	0.39902
0.69808	0.37033	0.38188	0.39497		0.38063	0.38333	0.39901
0.72394	0.37251	0.3808	0.39749		0.38018	0.38305	0.39886
0.74979	0.37185	0.37832	0.39707		0.38006	0.38298	0.39882
0.77564	0.37198	0.37834	0.39709		0.37974	0.38278	0.39871
0.8015	0.36804	0.37677	0.39773		0.37947	0.38262	0.39863
0.82735	0.36574	0.37719	0.40067		0.37929	0.38251	0.39856
0.85321	0.36441	0.37728	0.3983		0.37888	0.38225	0.39843
0.87906	0.36156	0.37613	0.39651		0.37884	0.38223	0.39842
0.90492	0.3657	0.37767	0.394		0.3784	0.38196	0.39827
0.93077	0.36764	0.37789	0.39324		0.37829	0.38189	0.39823
0.95663	0.36931	0.37891	0.39427		0.37796	0.38169	0.39812
0.98248	0.37021	0.37706	0.39465		0.3777	0.38153	0.39803
1.00834	0.36838	0.37455	0.39332		0.37752	0.38142	0.39797
1.03419	0.37012	0.37465	0.39371		0.37711	0.38117	0.39784
1.06005	0.3675	0.37616	0.39506		0.37707	0.38114	0.39782
1.0859	0.36768	0.37679	0.39811		0.37663	0.38087	0.39768
1.11176	0.36429	0.37561	0.3927		0.37653	0.38081	0.39764
1.13761	0.36176	0.37327	0.39049		0.37619	0.3806	0.39753
1.16347	0.36308	0.37323	0.39007		0.37595	0.38045	0.39745
1.18932	0.36425	0.37253	0.38986		0.37576	0.38033	0.39738
1.21518	0.36432	0.37267	0.39099		0.37536	0.38009	0.39725
1.24103	0.36422	0.37216	0.39094		0.37532	0.38006	0.39723
1.26689	0.36255	0.3718	0.38908		0.37488	0.37979	0.39709
1.29274	0.36317	0.37216	0.38996		0.37478	0.37973	0.39705
1.3186	0.36551	0.37259	0.39018		0.37444	0.37953	0.39694
1.34445	0.3655	0.36884	0.3915		0.37421	0.37938	0.39686
1.37031	0.36426	0.36876	0.39137		0.37401	0.37926	0.39679
1.39616	0.36235	0.36909	0.39155		0.37363	0.37902	0.39666
1.42202	0.36239	0.37235	0.3908		0.37357	0.37899	0.39665
1.44787	0.36363	0.37822	0.3888		0.37314	0.37872	0.3965
1.47373	0.36375	0.3798	0.38681		0.37305	0.37867	0.39647
1.49958	0.36269	0.38235	0.38623		0.37271	0.37846	0.39635
1.52543	0.36414	0.38301	0.38452		0.37248	0.37831	0.39628
1.55129	0.36152	0.38145	0.38586		0.37228	0.37819	0.39621
1.57714	0.36355	0.37852	0.38651		0.37191	0.37796	0.39608
1.603	0.36107	0.37468	0.38858		0.37185	0.37792	0.39606
1.62885	0.35883	0.37334	0.38955		0.37142	0.37766	0.39592
1.65471	0.35896	0.37306	0.38506		0.37134	0.37761	0.39589
1.68056	0.35966	0.3741	0.38096		0.37099	0.37739	0.39577
1.70642	0.35816	0.37291	0.38224		0.37077	0.37726	0.39569
1.73227	0.35658	0.36887	0.38623		0.37056	0.37713	0.39562
1.75813	0.3564	0.36563	0.38624		0.3702	0.3769	0.3955
1.78398	0.35847	0.36248	0.3874		0.37013	0.37686	0.39548
1.80984	0.35501	0.36193	0.3908		0.36971	0.3766	0.39533
1.83569	0.35505	0.36097	0.39359		0.36963	0.37655	0.39531
1.86155	0.35253	0.36212	0.39558		0.36928	0.37634	0.39519
1.8874	0.35072	0.36379	0.39455		0.36907	0.37621	0.39511
1.91326	0.35228	0.36872	0.3917		0.36886	0.37607	0.39504
1.93911	0.35214	0.37132	0.39091		0.3685	0.37586	0.39492
1.96497	0.35188	0.3714	0.39714		0.36843	0.37581	0.3949
1.99082	0.35148	0.36962	0.39819		0.36801	0.37555	0.39475
2.01668	0.35096	0.36625	0.39561		0.36794	0.37551	0.39473
2.04253	0.35129	0.36278	0.39389		0.36759	0.37529	0.39461
2.06839	0.34573	0.3631	0.39453		0.36738	0.37516	0.39454
2.09424	0.34409	0.36278	0.39585		0.36717	0.37503	0.39446
2.1201	0.34262	0.36341	0.39062		0.36682	0.37482	0.39435
2.14595	0.34397	0.36277	0.38646		0.36674	0.37477	0.39432
2.17181	0.34498	0.36543	0.3853		0.36633	0.37451	0.39417
2.19766	0.34561	0.36645	0.38349		0.36627	0.37447	0.39415
2.22352	0.34488	0.36691	0.38267		0.36591	0.37425	0.39403
2.24937	0.34724	0.36659	0.38113		0.36571	0.37413	0.39396
2.27522	0.34875	0.36442	0.38289		0.36549	0.37399	0.39389
2.30108	0.35083	0.36312	0.38358		0.36516	0.37378	0.39377
2.32693	0.3482	0.36485	0.38919		0.36507	0.37373	0.39374
2.35279	0.35092	0.36728	0.3906		0.36466	0.37347	0.3936
2.37864	0.35236	0.36903	0.38561		0.3646	0.37344	0.39358
2.4045	0.35306	0.36867	0.38972		0.36424	0.37321	0.39346
2.43035	0.35066	0.36948	0.3911		0.36405	0.3731	0.39339
2.45621	0.34804	0.36467	0.38973		0.36383	0.37296	0.39331
2.48206	0.34383	0.35974	0.38907		0.3635	0.37275	0.3932
2.50792	0.3448	0.3561	0.38876		0.36341	0.3727	0.39317
2.53377	0.34705	0.35326	0.38984		0.363	0.37244	0.39303
2.55963	0.34911	0.34794	0.38946		0.36295	0.37241	0.39301
2.58548	0.35004	0.34793	0.38894		0.36259	0.37219	0.39288
2.61134	0.34966	0.35077	0.38803		0.36241	0.37207	0.39282
2.63719	0.34811	0.35408	0.38545		0.36218	0.37193	0.39274
2.66305	0.34537	0.35711	0.38737		0.36186	0.37173	0.39263
2.6889	0.34574	0.36389	0.38736		0.36176	0.37167	0.3926
2.71476	0.34456	0.36375	0.38652		0.36136	0.37142	0.39246
2.74061	0.34181	0.3652	0.38602		0.36132	0.3714	0.39244
2.76647	0.34254	0.3683	0.38199		0.36095	0.37116	0.39231
2.79232	0.3435	0.37125	0.37714		0.36077	0.37106	0.39225
2.81818	0.34354	0.36474	0.37596		0.36054	0.37091	0.39217
2.84403	0.34283	0.36259	0.3786		0.36023	0.37072	0.39206
2.86989	0.33977	0.35763	0.38019		0.36013	0.37066	0.39203
2.89574	0.33257	0.35352	0.38025		0.35973	0.3704	0.39189
2.9216	0.33096	0.35099	0.37778		0.35969	0.37038	0.39188
2.94745	0.33298	0.35069	0.38116		0.35932	0.37015	0.39174
2.9733	0.33127	0.34933	0.38151		0.35916	0.37005	0.39169
2.99916	0.3344	0.34917	0.38419		0.35892	0.3699	0.3916
3.02501	0.33727	0.35046	0.38412		0.35862	0.36971	0.3915
3.05087	0.33574	0.35187	0.38429		0.35851	0.36965	0.39146
3.07672	0.33867	0.34972	0.38802		0.35811	0.3694	0.39132
3.10258	0.33631	0.35553	0.39412		0.35808	0.36938	0.39131
3.12843	0.33913	0.35772	0.39161		0.35771	0.36914	0.39118
3.15429	0.33907	0.36037	0.39045		0.35755	0.36905	0.39112
3.18014	0.34128	0.36019	0.38329		0.3573	0.36889	0.39104
3.206	0.34015	0.36092	0.37979		0.35702	0.36871	0.39094
3.23185	0.34401	0.36168	0.37639		0.3569	0.36864	0.3909
3.25771	0.34495	0.36044	0.37551		0.3565	0.36839	0.39076
3.28356	0.34402	0.35865	0.38004		0.35649	0.36838	0.39075
3.30942	0.34119	0.35672	0.38221		0.35611	0.36814	0.39061
3.33527	0.34353	0.35612	0.38231		0.35596	0.36805	0.39056
3.36113	0.34003	0.35843	0.38637		0.35571	0.3679	0.39047
3.38698	0.34356	0.35769	0.38837		0.35543	0.36772	0.39038
3.41284	0.34021	0.35603	0.39319		0.35531	0.36765	0.39033
3.43869	0.33773	0.35379	0.39094		0.35491	0.3674	0.39019
3.46455	0.33282	0.3573	0.39004		0.3549	0.36739	0.39019
3.4904	0.33522	0.35804	0.38898		0.35452	0.36715	0.39005
3.51626	0.33304	0.35659	0.38863		0.35438	0.36706	0.39
3.54211	0.33453	0.35883	0.39052		0.35412	0.3669	0.38991
3.56797	0.33453	0.35881	0.38331		0.35385	0.36673	0.38982
3.59382	0.33611	0.35825	0.38472		0.35373	0.36666	0.38977
3.61968	0.33441	0.35453	0.38312		0.35334	0.36641	0.38963
3.64553	0.32967	0.35462	0.38615		0.35333	0.36641	0.38963
3.67139	0.32699	0.35132	0.38423		0.35294	0.36617	0.38949
3.69724	0.3292	0.35019	0.38119		0.35281	0.36608	0.38945
3.72309	0.32774	0.34888	0.38376		0.35255	0.36592	0.38935
3.74895	0.32678	0.34347	0.37973		0.35229	0.36575	0.38926
3.7748	0.32655	0.33868	0.38035		0.35216	0.36567	0.38922
3.80066	0.3262	0.34359	0.3818		0.35177	0.36543	0.38908
3.82651	0.32417	0.34656	0.37824		0.35177	0.36543	0.38908
3.85237	0.31967	0.35027	0.38643		0.35138	0.36519	0.38894
3.87822	0.31853	0.3526	0.3829		0.35125	0.3651	0.38889
3.90408	0.31516	0.35816	0.37888		0.35099	0.36494	0.3888
3.92993	0.31634	0.36083	0.37706		0.35074	0.36478	0.38871
3.95579	0.31904	0.36175	0.37731		0.3506	0.3647	0.38866
3.98164	0.32131	0.35918	0.37711		0.35022	0.36446	0.38852
4.0075	0.31994	0.35622	0.37308		0.35022	0.36445	0.38852
4.03335	0.32674	0.35505	0.37775		0.34983	0.36421	0.38838
4.05921	0.32949	0.35512	0.38125		0.34971	0.36414	0.38834
4.08506	0.33048	0.35687	0.38176		0.34945	0.36397	0.38824
4.11092	0.3285	0.35638	0.38495		0.3492	0.36381	0.38815
4.13677	0.32807	0.35444	0.37706		0.34906	0.36373	0.38811
4.16263	0.32987	0.35452	0.37477		0.34869	0.36349	0.38797
4.18848	0.32476	0.35326	0.37571		0.34868	0.36349	0.38797
4.21434	0.32173	0.34952	0.37767		0.34829	0.36325	0.38783
4.24019	0.3223	0.34704	0.38253		0.34818	0.36317	0.38779
4.26605	0.32117	0.34208	0.38365		0.34791	0.363	0.38769
4.2919	0.32782	0.34289	0.38818		0.34767	0.36285	0.38761
4.31776	0.32172	0.34411	0.38566		0.34753	0.36276	0.38755
4.34361	0.32103	0.35208	0.38708		0.34717	0.36254	0.38742
4.36947	0.32011	0.35168	0.38641		0.34715	0.36252	0.38742
4.39532	0.32153	0.35265	0.38096		0.34677	0.36229	0.38728
4.42118	0.3223	0.35735	0.38353		0.34666	0.36222	0.38724
4.44703	0.3177	0.35544	0.38149		0.34639	0.36205	0.38714
4.47288	0.31545	0.34993	0.38466		0.34616	0.3619	0.38706
4.49874	0.31376	0.34481	0.38558		0.34601	0.36181	0.387
4.52459	0.3145	0.34253	0.38405		0.34566	0.36158	0.38688
4.55045	0.32041	0.34356	0.38432		0.34563	0.36157	0.38687
4.5763	0.31729	0.34598	0.37989		0.34516	0.36127	0.38669
4.60216	0.31734	0.34601	0.37481		0.34466	0.36095	0.38651
4.62801	0.31529	0.34305	0.37619		0.34416	0.36064	0.38633
4.65387	0.32012	0.34183	0.37337		0.34366	0.36032	0.38615
4.67972	0.31686	0.34346	0.37892		0.34317	0.36001	0.38597
4.70558	0.31134	0.3418	0.37884		0.34267	0.3597	0.38579
4.73143	0.30422	0.3384	0.38112		0.34218	0.35939	0.38561
4.75729	0.3001	0.33973	0.38377		0.34169	0.35908	0.38543
4.78314	0.30046	0.34222	0.38311		0.3412	0.35877	0.38525
4.809	0.29791	0.34159	0.38373		0.34071	0.35846	0.38507
4.83485	0.30609	0.3454	0.37972		0.34022	0.35815	0.38489
4.86071	0.30902	0.34609	0.36909		0.33974	0.35784	0.38471
4.88656	0.31549	0.34704	0.37036		0.33925	0.35753	0.38453
4.91242	0.32472	0.34755	0.36863		0.33877	0.35723	0.38435
4.93827	0.32836	0.34336	0.37252		0.33829	0.35692	0.38417
4.96413	0.32511	0.34101	0.37574		0.33781	0.35662	0.384
4.98998	0.32217	0.3427	0.37963		0.33733	0.35631	0.38382
5.01584	0.31423	0.34233	0.38291		0.33685	0.35601	0.38364
5.04169	0.30816	0.33818	0.38227		0.33637	0.3557	0.38346
5.06755	0.30417	0.33624	0.3803		0.33589	0.3554	0.38328
5.0934	0.3118	0.33798	0.3806		0.33542	0.3551	0.38311
5.11926	0.31066	0.33975	0.37573		0.33495	0.3548	0.38293
5.14511	0.30699	0.34333	0.37487		0.33447	0.3545	0.38275
5.17097	0.30662	0.33984	0.37305		0.334	0.3542	0.38258
5.19682	0.30474	0.33352	0.36504		0.33353	0.3539	0.3824
5.22267	0.30031	0.3342	0.36831		0.33307	0.3536	0.38223
5.24853	0.29864	0.33962	0.37345		0.3326	0.3533	0.38205
5.27438	0.29362	0.33965	0.37654		0.33213	0.353	0.38187
5.30024	0.29945	0.33776	0.37907		0.33167	0.35271	0.3817
5.32609	0.30784	0.34033	0.38173		0.33121	0.35241	0.38152
5.35195	0.31601	0.33801	0.3905		0.33074	0.35212	0.38135
5.3778	0.32022	0.34123	0.38852		0.33028	0.35182	0.38117
5.40366	0.3173	0.3432	0.38691		0.32982	0.35153	0.381
5.42951	0.32061	0.34361	0.38123		0.32937	0.35124	0.38083
5.45537	0.31956	0.34061	0.37051		0.32891	0.35094	0.38065
5.48122	0.31715	0.33906	0.37562		0.32845	0.35065	0.38048
5.50708	0.31515	0.33954	0.37514		0.328	0.35036	0.38031
5.53293	0.31072	0.34475	0.37203		0.32755	0.35007	0.38013
5.55879	0.31052	0.3462	0.37117		0.32709	0.34978	0.37996
5.58464	0.30893	0.34854	0.37733		0.32664	0.34949	0.37979
5.6105	0.30717	0.34127	0.37828		0.32619	0.3492	0.37961
5.63635	0.30278	0.33936	0.37924		0.32574	0.34891	0.37944
5.66221	0.29952	0.34116	0.38404		0.3253	0.34863	0.37927
5.68806	0.30309	0.34569	0.38377		0.32485	0.34834	0.3791
5.71392	0.30057	0.34596	0.38205		0.32441	0.34805	0.37893
5.73977	0.3031	0.34659	0.38552		0.32396	0.34777	0.37875
5.76563	0.30321	0.35034	0.37574		0.32352	0.34748	0.37858
5.79148	0.30634	0.35524	0.37234		0.32308	0.3472	0.37841
5.81734	0.31093	0.35623	0.36992		0.32264	0.34691	0.37824
5.84319	0.30814	0.35377	0.3722		0.3222	0.34663	0.37807
5.86905	0.30636	0.3432	0.37128		0.32176	0.34635	0.3779
5.8949	0.30505	0.33648	0.37228		0.32133	0.34607	0.37773
5.92076	0.29734	0.3321	0.37623		0.32089	0.34579	0.37756
5.94661	0.29834	0.32897	0.37335		0.32046	0.34551	0.37739
5.97246	0.29393	0.33086	0.37559		0.32002	0.34523	0.37722
5.99832	0.29945	0.33062	0.37503		0.31959	0.34495	0.37705
6.02417	0.29805	0.33512	0.37033		0.31916	0.34467	0.37688
6.05003	0.30071	0.33205	0.37578		0.31873	0.34439	0.37672
6.07588	0.3054	0.33122	0.37774		0.3183	0.34411	0.37655
6.10174	0.30189	0.32974	0.37947		0.31787	0.34384	0.37638
6.12759	0.30245	0.32371	0.38053		0.31745	0.34356	0.37621
6.15345	0.30303	0.32248	0.37331		0.31702	0.34329	0.37604
6.1793	0.29602	0.32011	0.37314		0.3166	0.34301	0.37588
6.20516	0.3061	0.32028	0.36873		0.31618	0.34274	0.37571
6.23101	0.30925	0.32077	0.36788		0.31575	0.34246	0.37554
6.25687	0.31682	0.31989	0.37368		0.31533	0.34219	0.37537
6.28272	0.31781	0.32678	0.3725		0.31491	0.34192	0.37521
6.30858	0.31784	0.32158	0.37491		0.3145	0.34165	0.37504
6.33443	0.31849	0.32255	0.37327		0.31408	0.34138	0.37487
6.36029	0.31714	0.32998	0.37151		0.31366	0.34111	0.37471
6.38614	0.31195	0.33265	0.37312		0.31325	0.34084	0.37454
6.412	0.30648	0.33802	0.36353		0.31283	0.34057	0.37438
6.43785	0.30158	0.34242	0.36456		0.31242	0.3403	0.37421
6.46371	0.29509	0.34514	0.36636		0.31201	0.34003	0.37405
6.48956	0.29434	0.34346	0.3648		0.3116	0.33976	0.37388
6.51542	0.29483	0.34055	0.3662		0.31119	0.3395	0.37372
6.54127	0.29549	0.34137	0.36065		0.31078	0.33923	0.37355
6.56713	0.29655	0.33567	0.35528		0.31037	0.33896	0.37339
6.59298	0.2978	0.33826	0.35629		0.30997	0.3387	0.37322
6.61884	0.30286	0.33572	0.36028		0.30956	0.33843	0.37306
6.64469	0.29673	0.32771	0.361		0.30916	0.33817	0.3729
6.67055	0.28825	0.32584	0.3589		0.30876	0.33791	0.37273
6.6964	0.28803	0.33035	0.36498		0.30835	0.33764	0.37257
6.72225	0.27863	0.32697	0.36967		0.30795	0.33738	0.37241
6.74811	0.28225	0.32938	0.36819		0.30755	0.33712	0.37224
6.77396	0.2855	0.33617	0.35932		0.30716	0.33686	0.37208
6.79982	0.28888	0.33556	0.362		0.30676	0.3366	0.37192
6.82567	0.28916	0.34074	0.36037		0.30636	0.33634	0.37176
6.85153	0.28989	0.34369	0.36882		0.30597	0.33608	0.37159
6.87738	0.29533	0.34366	0.37331		0.30557	0.33582	0.37143
6.90324	0.29843	0.34303	0.36921		0.30518	0.33556	0.37127
6.92909	0.29935	0.33965	0.37074		0.30479	0.33531	0.37111
6.95495	0.30271	0.33948	0.37027		0.3044	0.33505	0.37095
6.9808	0.30588	0.32943	0.37563		0.30401	0.33479	0.37079
7.00666	0.30759	0.32693	0.37128		0.30362	0.33454	0.37063
7.03251	0.3147	0.31979	0.3564		0.30323	0.33428	0.37047
7.05837	0.31025	0.30408	0.35417		0.30284	0.33403	0.37031
7.08422	0.31144	0.30653	0.35659		0.30246	0.33377	0.37015
7.11008	0.30031	0.30624	0.35813		0.30207	0.33352	0.36999
7.13593	0.29941	0.31252	0.35399		0.30169	0.33327	0.36983
7.16179	0.29793	0.31505	0.34897		0.3013	0.33302	0.36967
7.18764	0.29793	0.31207	0.34892		0.30092	0.33276	0.36951
7.2135	0.29057	0.31797	0.34639		0.30054	0.33251	0.36935
7.23935	0.29761	0.31661	0.35213		0.30016	0.33226	0.36919
7.26521	0.30202	0.31236	0.35038		0.29978	0.33201	0.36903
7.29106	0.31341	0.30462	0.34266		0.29941	0.33176	0.36887
7.31692	0.31535	0.29759	0.34748		0.29903	0.33151	0.36871
7.34277	0.32437	0.2983	0.34899		0.29865	0.33127	0.36856
7.36863	0.31899	0.30097	0.34808		0.29828	0.33102	0.3684
7.39448	0.32426	0.30441	0.34874		0.2979	0.33077	0.36824
7.42034	0.31417	0.314	0.35643		0.29753	0.33052	0.36808
7.44619	0.30869	0.31455	0.35857		0.29716	0.33028	0.36793
7.47204	0.2895	0.32307	0.36034		0.29679	0.33003	0.36777
7.4979	0.28356	0.32164	0.36109		0.29642	0.32979	0.36761
7.52375	0.27526	0.32392	0.36653		0.29605	0.32954	0.36746
7.54961	0.28208	0.31847	0.37378		0.29568	0.3293	0.3673
7.57546	0.28045	0.3193	0.37649		0.29532	0.32906	0.36714
7.60132	0.28816	0.3066	0.37069		0.29495	0.32881	0.36699
7.62717	0.29786	0.31075	0.37261		0.29459	0.32857	0.36683
7.65303	0.30392	0.31108	0.36853		0.29422	0.32833	0.36668
7.67888	0.30314	0.31509	0.37979		0.29386	0.32809	0.36652
7.70474	0.30274	0.31606	0.37115		0.2935	0.32785	0.36637
7.73059	0.28887	0.31317	0.36497		0.29314	0.32761	0.36621
7.75645	0.28802	0.30666	0.36118		0.29278	0.32737	0.36606
7.7823	0.28337	0.31563	0.3561		0.29242	0.32713	0.3659
7.80816	0.28181	0.3143	0.36346		0.29206	0.32689	0.36575
7.83401	0.27376	0.31776	0.36569		0.2917	0.32665	0.36559
7.85987	0.27035	0.31061	0.36886		0.29135	0.32642	0.36544
7.88572	0.28076	0.31236	0.35747		0.29099	0.32618	0.36529
7.91158	0.27107	0.31377	0.36468		0.29064	0.32594	0.36513
7.93743	0.26917	0.32131	0.37059		0.29028	0.32571	0.36498
7.96329	0.27492	0.32489	0.36484		0.28993	0.32547	0.36483
7.98914	0.27725	0.31715	0.36296		0.28958	0.32524	0.36467
8.015	0.28275	0.3197	0.36033		0.28923	0.325	0.36452
8.04085	0.28433	0.33134	0.35312		0.28888	0.32477	0.36437
8.06671	0.27434	0.3246	0.3613		0.28853	0.32454	0.36421
8.09256	0.27575	0.3237	0.36811		0.28818	0.3243	0.36406
8.11842	0.27571	0.31407	0.35432		0.28784	0.32407	0.36391
8.14427	0.28031	0.30375	0.35199		0.28749	0.32384	0.36376
8.17013	0.27215	0.30266	0.36659		0.28715	0.32361	0.36361
8.19598	0.26974	0.30289	0.36238		0.2868	0.32338	0.36346
8.22183	0.27812	0.29827	0.37426		0.28646	0.32315	0.36331
8.24769	0.27673	0.29746	0.37293		0.28612	0.32292	0.36315
8.27354	0.27682	0.30088	0.36733		0.28578	0.32269	0.363
8.2994	0.27922	0.30522	0.36177		0.28544	0.32246	0.36285
8.32525	0.27156	0.30201	0.34962		0.2851	0.32223	0.3627
8.35111	0.28152	0.30958	0.34385		0.28476	0.322	0.36255
8.37696	0.28106	0.303	0.33505		0.28442	0.32178	0.3624
8.40282	0.26973	0.31318	0.34805		0.28408	0.32155	0.36225
8.42867	0.27227	0.3301	0.35238		0.28375	0.32133	0.3621
8.45453	0.26283	0.33225	0.35663		0.28341	0.3211	0.36195
8.48038	0.25837	0.33324	0.37129		0.28308	0.32088	0.3618
8.50624	0.26334	0.33223	0.36739		0.28275	0.32065	0.36166
8.53209	0.26891	0.32173	0.37432		0.28242	0.32043	0.36151
8.55795	0.27283	0.31032	0.37164		0.28208	0.3202	0.36136
8.5838	0.27088	0.30457	0.35749		0.28175	0.31998	0.36121
8.60966	0.28309	0.30097	0.35181		0.28142	0.31976	0.36106
8.63551	0.28275	0.29883	0.34292		0.2811	0.31954	0.36091
8.66137	0.2764	0.31184	0.33447		0.28077	0.31931	0.36077
8.68722	0.28295	0.32559	0.33726		0.28044	0.31909	0.36062
8.71308	0.27178	0.3182	0.33629		0.28012	0.31887	0.36047
8.73893	0.2812	0.32248	0.34205		0.27979	0.31865	0.36032
8.76479	0.29249	0.33382	0.34696		0.27947	0.31843	0.36018
8.79064	0.28237	0.33737	0.35795		0.27914	0.31821	0.36003
8.8165	0.2844	0.33673	0.36995		0.27882	0.318	0.35988
8.84235	0.28053	0.33345	0.37512		0.2785	0.31778	0.35974
8.86821	0.281	0.33053	0.36966		0.27818	0.31756	0.35959
8.89406	0.28162	0.33278	0.36353		0.27786	0.31734	0.35944
8.91991	0.27729	0.3344	0.36415		0.27754	0.31713	0.3593
8.94577	0.28864	0.32842	0.36452		0.27722	0.31691	0.35915
8.97162	0.28678	0.30969	0.35718		0.2769	0.3167	0.35901
8.99748	0.29474	0.30341	0.34806		0.27659	0.31648	0.35886
9.02333	0.28287	0.30067	0.34216		0.27627	0.31627	0.35872
9.04919	0.2768	0.29497	0.32377		0.27596	0.31605	0.35857
9.07504	0.28363	0.28881	0.33022		0.27564	0.31584	0.35843
9.1009	0.26436	0.28696	0.3348		0.27533	0.31563	0.35828
9.12675	0.26019	0.29176	0.3343		0.27502	0.31541	0.35814
9.15261	0.26028	0.29914	0.33991		0.27471	0.3152	0.35799
9.17846	0.25826	0.31383	0.34574		0.2744	0.31499	0.35785
9.20432	0.26383	0.31951	0.34234		0.27409	0.31478	0.35771
9.23017	0.2732	0.31953	0.34266		0.27378	0.31457	0.35756
9.25603	0.28598	0.3251	0.33691		0.27347	0.31436	0.35742
9.28188	0.28529	0.31555	0.32803		0.27316	0.31415	0.35728
9.30774	0.28635	0.31823	0.32288		0.27286	0.31394	0.35713
9.33359	0.28837	0.31579	0.33514		0.27255	0.31373	0.35699
9.35945	0.27421	0.30908	0.34848		0.27224	0.31352	0.35685
9.3853	0.27377	0.31073	0.34815		0.27194	0.31331	0.35671
9.41116	0.26312	0.31162	0.36031		0.27164	0.3131	0.35656
9.43701	0.24721	0.31242	0.37287		0.27134	0.3129	0.35642
9.46287	0.24545	0.31498	0.38283		0.27103	0.31269	0.35628
9.48872	0.25698	0.32149	0.3854		0.27073	0.31249	0.35614
9.51458	0.26672	0.3238	0.38283		0.27043	0.31228	0.356
9.54043	0.26355	0.31344	0.37817		0.27013	0.31207	0.35585
9.56629	0.26056	0.33182	0.38777		0.26984	0.31187	0.35571
9.59214	0.26553	0.33427	0.3907		0.26954	0.31167	0.35557
9.618	0.26745	0.3278	0.38301		0.26924	0.31146	0.35543
9.64385	0.26056	0.32625	0.37047		0.26895	0.31126	0.35529
9.6697	0.25706	0.31258	0.36558		0.26865	0.31106	0.35515
9.69556	0.26813	0.3009	0.35709		0.26836	0.31085	0.35501
9.72141	0.28516	0.30014	0.35006		0.26806	0.31065	0.35487
9.74727	0.29179	0.30502	0.33649		0.26777	0.31045	0.35473
9.77312	0.29524	0.30018	0.33059		0.26748	0.31025	0.35459
9.79898	0.28933	0.29925	0.33137		0.26719	0.31005	0.35445
9.82483	0.28468	0.31163	0.33044		0.2669	0.30985	0.35431
9.85069	0.2696	0.3156	0.32971		0.26661	0.30965	0.35417
9.87654	0.26915	0.31064	0.3364		0.26632	0.30945	0.35403
9.9024	0.26006	0.30799	0.34444		0.26603	0.30925	0.3539
9.92825	0.24663	0.31113	0.34289		0.26574	0.30905	0.35376
9.95411	0.25265	0.30954	0.34341		0.26546	0.30885	0.35362
9.97996	0.25125	0.30075	0.34535		0.26517	0.30866	0.35348
10.0058	0.25015	0.30843	0.34541		0.26488	0.30846	0.35334
10.0317	0.25373	0.31032	0.3432		0.2646	0.30826	0.3532
10.0575	0.25786	0.30261	0.34891		0.26432	0.30807	0.35307
10.0834	0.26523	0.29216	0.34322		0.26403	0.30787	0.35293
10.1092	0.27436	0.2784	0.3453		0.26375	0.30768	0.35279
10.1351	0.29381	0.27306	0.36191		0.26347	0.30748	0.35265
10.1609	0.29641	0.28298	0.36708		0.26319	0.30729	0.35252
10.1868	0.2871	0.28617	0.36065		0.26291	0.30709	0.35238
10.2127	0.28367	0.28881	0.34597		0.26263	0.3069	0.35224
10.2385	0.27564	0.29212	0.34438		0.26235	0.30671	0.35211
10.2644	0.27575	0.29755	0.3402		0.26208	0.30651	0.35197
10.2902	0.28558	0.29956	0.33685		0.2618	0.30632	0.35184
10.3161	0.29006	0.30332	0.3421		0.26152	0.30613	0.3517
10.3419	0.27199	0.29937	0.34888		0.26125	0.30594	0.35156
10.3678	0.27594	0.29124	0.36183		0.26097	0.30575	0.35143
10.3936	0.27695	0.29463	0.37644		0.2607	0.30556	0.35129
10.4195	0.26994	0.29623	0.38093		0.26043	0.30537	0.35116
10.4453	0.27451	0.29255	0.37051		0.26015	0.30518	0.35102
10.4712	0.26387	0.30463	0.36209		0.25988	0.30499	0.35089
10.4971	0.26096	0.29761	0.35759		0.25961	0.3048	0.35075
10.5229	0.26618	0.28595	0.34267		0.25934	0.30461	0.35062
10.5488	0.27168	0.28539	0.34045		0.25907	0.30442	0.35048
10.5746	0.26687	0.28832	0.32415		0.2588	0.30424	0.35035
10.6005	0.24976	0.29475	0.3154		0.25854	0.30405	0.35022
10.6263	0.2573	0.28763	0.31215		0.25827	0.30386	0.35008
10.6522	0.2558	0.2928	0.31549		0.258	0.30368	0.34995
10.678	0.24299	0.30534	0.32201		0.25774	0.30349	0.34982
10.7039	0.23922	0.30648	0.32154		0.25747	0.3033	0.34968
10.7297	0.23644	0.30985	0.33419		0.25721	0.30312	0.34955
10.7556	0.24119	0.31261	0.33994		0.25694	0.30293	0.34942
10.7815	0.24843	0.31614	0.35247		0.25668	0.30275	0.34928
10.8073	0.25012	0.3208	0.35956		0.25642	0.30257	0.34915
10.8332	0.26528	0.32488	0.35495		0.25616	0.30238	0.34902
10.859	0.27071	0.32866	0.34961		0.2559	0.3022	0.34889
10.8849	0.28174	0.31711	0.34995		0.25564	0.30202	0.34875
10.9107	0.2839	0.3154	0.34469		0.25538	0.30184	0.34862
10.9366	0.26741	0.31968	0.32322		0.25512	0.30165	0.34849
10.9625	0.2594	0.29237	0.30902		0.25486	0.30147	0.34836
10.9883	0.26253	0.28118	0.30148		0.2546	0.30129	0.34823
11.0142	0.2471	0.28573	0.31646		0.25434	0.30111	0.3481
11.04	0.23547	0.28112	0.3255		0.25409	0.30093	0.34797
11.0659	0.21466	0.29196	0.32486		0.25383	0.30075	0.34783
11.0917	0.21593	0.29462	0.33485		0.25358	0.30057	0.3477
11.1176	0.20248	0.29404	0.33662		0.25332	0.30039	0.34757
11.1434	0.2018	0.30319	0.34768		0.25307	0.30021	0.34744
11.1693	0.21338	0.2993	0.34082		0.25282	0.30004	0.34731
11.1951	0.22064	0.31018	0.32629		0.25257	0.29986	0.34718
11.221	0.24338	0.29032	0.30922		0.25232	0.29968	0.34705
11.2469	0.26449	0.29808	0.31134		0.25206	0.29951	0.34692
11.2727	0.26663	0.30546	0.32691		0.25182	0.29933	0.34679
11.2986	0.26506	0.31233	0.32356		0.25157	0.29915	0.34667
11.3244	0.24598	0.31061	0.31536		0.25132	0.29898	0.34654
11.3503	0.24103	0.30407	0.31108		0.25107	0.2988	0.34641
11.3761	0.2179	0.30429	0.30887		0.25082	0.29863	0.34628
11.402	0.22027	0.30964	0.3186		0.25058	0.29845	0.34615
11.4278	0.23337	0.31371	0.32788		0.25033	0.29828	0.34602
11.4537	0.24587	0.31443	0.32917		0.25008	0.2981	0.34589
11.4795	0.26401	0.30426	0.3238		0.24984	0.29793	0.34576
11.5054	0.28733	0.31681	0.33143		0.2496	0.29776	0.34564
11.5312	0.28453	0.31722	0.35677		0.24935	0.29759	0.34551
11.5571	0.28802	0.32468	0.35496		0.24911	0.29741	0.34538
11.583	0.28608	0.33172	0.36736		0.24887	0.29724	0.34525
11.6088	0.30553	0.34605	0.36877		0.24863	0.29707	0.34513
11.6347	0.30231	0.33932	0.36552		0.24839	0.2969	0.345
11.6605	0.31029	0.34579	0.36248		0.24815	0.29673	0.34487
11.6864	0.30558	0.34869	0.37435		0.24791	0.29656	0.34475
11.7122	0.29171	0.34266	0.3752		0.24767	0.29639	0.34462
11.7381	0.25923	0.33905	0.3711		0.24743	0.29622	0.34449
11.7639	0.24625	0.32894	0.35005		0.24719	0.29605	0.34437
11.7898	0.22143	0.32116	0.36454		0.24695	0.29588	0.34424
11.8157	0.20535	0.32019	0.34726		0.24672	0.29571	0.34411
11.8415	0.19995	0.309	0.35528		0.24648	0.29554	0.34399
11.8674	0.21028	0.29728	0.33906		0.24625	0.29538	0.34386
11.8932	0.21814	0.28421	0.33472		0.24601	0.29521	0.34374
11.9191	0.21705	0.27781	0.33855		0.24578	0.29504	0.34361
11.9449	0.22149	0.26915	0.34177		0.24555	0.29488	0.34349
11.9708	0.21991	0.2656	0.35797		0.24531	0.29471	0.34336
11.9966	0.21501	0.26577	0.34912		0.24508	0.29454	0.34324
12.0225	0.24663	0.26599	0.33501		0.24485	0.29438	0.34311
12.0483	0.26481	0.27219	0.36374		0.24462	0.29421	0.34299
12.0742	0.27883	0.27944	0.3755		0.24439	0.29405	0.34286
12.1001	0.2864	0.28197	0.37541		0.24416	0.29389	0.34274
12.1259	0.30927	0.30708	0.36731		0.24393	0.29372	0.34262
12.1518	0.3342	0.31545	0.38062		0.2437	0.29356	0.34249
12.1776	0.31699	0.32507	0.37849		0.24348	0.2934	0.34237
12.2035	0.30731	0.32781	0.35303		0.24325	0.29323	0.34224
12.2293	0.29812	0.32146	0.34326		0.24302	0.29307	0.34212
12.2552	0.27553	0.32423	0.31062		0.2428	0.29291	0.342
12.281	0.26566	0.31313	0.31044		0.24257	0.29275	0.34188
12.3069	0.25576	0.30065	0.33887		0.24235	0.29258	0.34175
12.3328	0.24922	0.29952	0.34934		0.24212	0.29242	0.34163
12.3586	0.23947	0.29648	0.35441		0.2419	0.29226	0.34151
12.3845	0.25692	0.28795	0.35799		0.24168	0.2921	0.34138
12.4103	0.24451	0.2669	0.37455		0.24146	0.29194	0.34126
12.4362	0.23471	0.2618	0.37223		0.24124	0.29178	0.34114
12.462	0.24116	0.26264	0.36085		0.24101	0.29162	0.34102
12.4879	0.25905	0.26407	0.34155		0.24079	0.29147	0.3409
12.5137	0.25584	0.27756	0.33074		0.24057	0.29131	0.34078
12.5396	0.24882	0.28174	0.35812		0.24036	0.29115	0.34065
12.5655	0.25008	0.30184	0.35864		0.24014	0.29099	0.34053
12.5913	0.26371	0.32374	0.35637		0.23992	0.29083	0.34041
12.6172	0.27065	0.32284	0.3544		0.2397	0.29068	0.34029
12.643	0.26827	0.31966	0.3436		0.23948	0.29052	0.34017
12.6689	0.23903	0.31907	0.34671		0.23927	0.29036	0.34005
12.6947	0.23613	0.30204	0.35848		0.23905	0.29021	0.33993
12.7206	0.23805	0.30231	0.37704		0.23884	0.29005	0.33981
12.7464	0.23706	0.29879	0.37463		0.23862	0.2899	0.33969
12.7723	0.23563	0.28875	0.39042		0.23841	0.28974	0.33957
12.7981	0.23397	0.27887	0.39315		0.2382	0.28959	0.33945
12.824	0.24477	0.27699	0.37512		0.23798	0.28943	0.33933
12.8498	0.26968	0.2782	0.359		0.23777	0.28928	0.33921
12.8757	0.25504	0.26996	0.3495		0.23756	0.28913	0.33909
12.9016	0.23913	0.26149	0.3317		0.23735	0.28897	0.33897
12.9274	0.22758	0.26484	0.32555		0.23714	0.28882	0.33885
12.9533	0.2307	0.25979	0.31552		0.23693	0.28867	0.33873
12.9791	0.21577	0.27294	0.31187		0.23672	0.28852	0.33861
13.005	0.20627	0.26739	0.31012		0.23651	0.28836	0.3385
13.0308	0.21268	0.27864	0.31944		0.2363	0.28821	0.33838
13.0567	0.23234	0.29189	0.31064		0.23609	0.28806	0.33826
13.0825	0.24431	0.29248	0.31469		0.23589	0.28791	0.33814
13.1084	0.25627	0.30714	0.31298		0.23568	0.28776	0.33802
13.1342	0.24872	0.30499	0.32296		0.23547	0.28761	0.3379
13.1601	0.24982	0.31078	0.32647		0.23527	0.28746	0.33779
13.186	0.27754	0.31054	0.33711		0.23506	0.28731	0.33767
13.2118	0.3032	0.29853	0.31484		0.23486	0.28716	0.33755
13.2377	0.28988	0.30669	0.30652		0.23466	0.28701	0.33744
13.2635	0.25597	0.29546	0.33855		0.23445	0.28686	0.33732
13.2894	0.23907	0.31852	0.36372		0.23425	0.28672	0.3372
13.3152	0.23424	0.30749	0.38102		0.23405	0.28657	0.33708
13.3411	0.23779	0.29603	0.36976		0.23385	0.28642	0.33697
13.3669	0.25958	0.2958	0.37023		0.23364	0.28627	0.33685
13.3928	0.27065	0.2822	0.37822		0.23344	0.28613	0.33674
13.4186	0.26317	0.29973	0.39252		0.23324	0.28598	0.33662
13.4445	0.30348	0.27744	0.39189		0.23304	0.28583	0.3365
13.4704	0.32385	0.26622	0.36184		0.23285	0.28569	0.33639
13.4962	0.30793	0.26762	0.33951		0.23265	0.28554	0.33627
13.5221	0.2719	0.25766	0.35662		0.23245	0.2854	0.33616
13.5479	0.26817	0.28106	0.35963		0.23225	0.28525	0.33604
13.5738	0.2687	0.28199	0.36001		0.23205	0.28511	0.33593
13.5996	0.27834	0.27931	0.3359		0.23186	0.28496	0.33581
13.6255	0.29406	0.27421	0.33927		0.23166	0.28482	0.3357
13.6514	0.28202	0.26955	0.34562		0.23147	0.28468	0.33558
13.6772	0.23379	0.27961	0.36269		0.23127	0.28453	0.33547
13.7031	0.21492	0.2806	0.36109		0.23108	0.28439	0.33535
13.7289	0.22148	0.28505	0.33299		0.23088	0.28425	0.33524
13.7548	0.21581	0.27849	0.31495		0.23069	0.28411	0.33512
13.7806	0.24823	0.26393	0.32149		0.2305	0.28396	0.33501
13.8065	0.25737	0.30455	0.31904		0.23031	0.28382	0.3349
13.8323	0.27301	0.32192	0.30745		0.23011	0.28368	0.33478
13.8582	0.2934	0.31171	0.3092		0.22992	0.28354	0.33467
13.884	0.29562	0.29968	0.30417		0.22973	0.2834	0.33455
13.9099	0.28829	0.28214	0.31777		0.22954	0.28326	0.33444
13.9358	0.2788	0.26107	0.32413		0.22935	0.28312	0.33433
13.9616	0.26523	0.28117	0.32765		0.22916	0.28298	0.33422
13.9875	0.24814	0.26526	0.32448		0.22898	0.28284	0.3341
14.0133	0.24998	0.25686	0.3455		0.22879	0.2827	0.33399
14.0392	0.26065	0.24237	0.36072		0.2286	0.28256	0.33388
14.065	0.23989	0.27237	0.35763		0.22841	0.28242	0.33377
14.0909	0.24196	0.27585	0.33879		0.22823	0.28229	0.33365
14.1167	0.24978	0.28312	0.33798		0.22804	0.28215	0.33354
14.1426	0.23069	0.28851	0.33455		0.22785	0.28201	0.33343
14.1684	0.24858	0.2826	0.32871		0.22767	0.28187	0.33332
14.1943	0.27419	0.27489	0.31441		0.22749	0.28174	0.33321
14.2202	0.26727	0.28601	0.3382		0.2273	0.2816	0.33309
14.246	0.24249	0.28594	0.35905		0.22712	0.28146	0.33298
14.2719	0.25646	0.29176	0.34786		0.22693	0.28133	0.33287
14.2977	0.23778	0.29546	0.34785		0.22675	0.28119	0.33276
14.3236	0.22679	0.29463	0.33614		0.22657	0.28106	0.33265
14.3494	0.21949	0.29814	0.30844		0.22639	0.28092	0.33254
14.3753	0.21575	0.31119	0.3132		0.22621	0.28079	0.33243
14.4011	0.23219	0.32213	0.30785		0.22603	0.28065	0.33232
14.427	0.25289	0.3092	0.27024		0.22585	0.28052	0.33221
14.4528	0.254	0.30931	0.27372		0.22567	0.28038	0.3321
14.4787	0.27921	0.31409	0.30298		0.22549	0.28025	0.33199
14.5046	0.27999	0.32741	0.31426		0.22531	0.28012	0.33188
14.5304	0.27382	0.32515	0.30574		0.22513	0.27998	0.33177
14.5563	0.26568	0.302	0.33259		0.22495	0.27985	0.33166
14.5821	0.23666	0.29327	0.3367		0.22478	0.27972	0.33155
14.608	0.22579	0.29551	0.34966		0.2246	0.27959	0.33144
14.6338	0.21832	0.27485	0.38224		0.22442	0.27946	0.33133
14.6597	0.22891	0.2789	0.36655		0.22425	0.27932	0.33122
14.6855	0.24194	0.26782	0.37482		0.22407	0.27919	0.33111
14.7114	0.22871	0.3028	0.35338		0.2239	0.27906	0.331
14.7372	0.24169	0.32405	0.38081		0.22372	0.27893	0.33089
14.7631	0.19568	0.32369	0.38774		0.22355	0.2788	0.33079
14.789	0.1808	0.31296	0.35462		0.22337	0.27867	0.33068
14.8148	0.14506	0.27967	0.35904		0.2232	0.27854	0.33057
14.8407	0.13413	0.29113	0.32829		0.22303	0.27841	0.33046
14.8665	0.15642	0.29907	0.32147		0.22286	0.27828	0.33035
14.8924	0.18006	0.29117	0.32513		0.22268	0.27815	0.33025
14.9182	0.1938	0.29585	0.33612		0.22251	0.27803	0.33014
14.9441	0.23766	0.29625	0.34529		0.22234	0.2779	0.33003
14.9699	0.27713	0.30996	0.34245		0.22217	0.27777	0.32992
14.9958	0.2855	0.3049	0.38819		0.222	0.27764	0.32982
15.0216	0.29047	0.28572	0.38541		0.22183	0.27751	0.32971
15.0475	0.2794	0.25505	0.34701		0.22166	0.27739	0.3296
15.0734	0.25207	0.24883	0.34418		0.2215	0.27726	0.3295
15.0992	0.26955	0.27083	0.30966		0.22133	0.27713	0.32939
15.1251	0.27398	0.30264	0.30788		0.22116	0.27701	0.32928
15.1509	0.26954	0.32498	0.30294		0.22099	0.27688	0.32918
15.1768	0.24293	0.3355	0.31167		0.22083	0.27676	0.32907
15.2026	0.22015	0.33237	0.31388		0.22066	0.27663	0.32896
15.2285	0.23296	0.32572	0.35142		0.22049	0.27651	0.32886
15.2544	0.20841	0.3031	0.36624		0.22033	0.27638	0.32875
15.2802	0.19477	0.28379	0.38257		0.22016	0.27626	0.32865
15.3061	0.188	0.26603	0.35207		0.22	0.27613	0.32854
15.3319	0.18757	0.28026	0.32685		0.21984	0.27601	0.32844
15.3578	0.2122	0.28271	0.30515		0.21967	0.27588	0.32833
15.3836	0.20409	0.29858	0.29448		0.21951	0.27576	0.32822
15.4095	0.19834	0.29017	0.2891		0.21935	0.27564	0.32812
15.4353	0.20614	0.28013	0.28784		0.21918	0.27551	0.32802
15.4612	0.21104	0.27809	0.32446		0.21902	0.27539	0.32791
15.487	0.24373	0.28239	0.36507		0.21886	0.27527	0.32781
15.5129	0.25443	0.2413	0.3879		0.2187	0.27515	0.3277
15.5388	0.28764	0.24796	0.38446		0.21854	0.27503	0.3276
15.5646	0.30496	0.2487	0.37856		0.21838	0.2749	0.32749
15.5905	0.29265	0.25018	0.34657		0.21822	0.27478	0.32739
15.6163	0.28219	0.24266	0.32828		0.21806	0.27466	0.32729
15.6422	0.2601	0.25915	0.33043		0.2179	0.27454	0.32718
15.668	0.25346	0.23553	0.34927		0.21774	0.27442	0.32708
15.6939	0.24966	0.24209	0.33851		0.21758	0.2743	0.32697
15.7197	0.2253	0.25139	0.36159		0.21743	0.27418	0.32687
15.7456	0.20062	0.26148	0.37166		0.21727	0.27406	0.32677
15.7714	0.19721	0.24697	0.42045		0.21711	0.27394	0.32666
15.7973	0.18767	0.26536	0.41254		0.21696	0.27382	0.32656
15.8232	0.18446	0.24942	0.43536		0.2168	0.2737	0.32646
15.849	0.19114	0.25515	0.42286		0.21665	0.27358	0.32636
15.8749	0.18175	0.23941	0.44173		0.21649	0.27347	0.32625
15.9007	0.19616	0.23606	0.4482		0.21634	0.27335	0.32615
15.9266	0.19966	0.24219	0.42915		0.21618	0.27323	0.32605
15.9524	0.21156	0.24713	0.41037		0.21603	0.27311	0.32595
15.9783	0.20584	0.26766	0.3828		0.21587	0.273	0.32585
16.0041	0.25268	0.28533	0.38278		0.21572	0.27288	0.32574
16.03	0.27848	0.30435	0.40269		0.21557	0.27276	0.32564
16.0558	0.26564	0.31484	0.36644		0.21542	0.27265	0.32554
16.0817	0.3	0.30923	0.3625		0.21527	0.27253	0.32544
16.1076	0.29322	0.31929	0.34394		0.21511	0.27241	0.32534
16.1334	0.25872	0.30936	0.35137		0.21496	0.2723	0.32524
16.1593	0.27047	0.30633	0.31583		0.21481	0.27218	0.32513
16.1851	0.27913	0.30458	0.3169		0.21466	0.27207	0.32503
16.211	0.26304	0.29055	0.33975		0.21451	0.27195	0.32493
16.2368	0.23506	0.27465	0.31546		0.21436	0.27184	0.32483
16.2627	0.26447	0.26814	0.32133		0.21421	0.27172	0.32473
16.2885	0.24493	0.25367	0.32881		0.21407	0.27161	0.32463
16.3144	0.21642	0.25364	0.34853		0.21392	0.2715	0.32453
16.3403	0.194	0.25388	0.36156		0.21377	0.27138	0.32443
16.3661	0.19932	0.2485	0.33927		0.21362	0.27127	0.32433
16.392	0.20481	0.246	0.3758		0.21348	0.27116	0.32423
16.4178	0.2584	0.24218	0.3834		0.21333	0.27104	0.32413
16.4437	0.28544	0.23712	0.41223		0.21318	0.27093	0.32403
16.4695	0.26144	0.23501	0.38416		0.21304	0.27082	0.32393
16.4954	0.26281	0.22332	0.35466		0.21289	0.27071	0.32383
16.5212	0.29249	0.25169	0.33584		0.21275	0.27059	0.32373
16.5471	0.27551	0.25934	0.33204		0.2126	0.27048	0.32363
16.5729	0.2416	0.29775	0.32507		0.21246	0.27037	0.32354
16.5988	0.23445	0.31012	0.33068		0.21231	0.27026	0.32344
16.6246	0.25019	0.28396	0.33474		0.21217	0.27015	0.32334
16.6505	0.23646	0.28539	0.36818		0.21203	0.27004	0.32324
16.6764	0.22385	0.28876	0.38324		0.21189	0.26993	0.32314
16.7022	0.21811	0.29878	0.37893		0.21174	0.26982	0.32304
16.7281	0.22332	0.26832	0.35044		0.2116	0.26971	0.32294
16.7539	0.24268	0.23678	0.32528		0.21146	0.2696	0.32285
16.7798	0.21234	0.21967	0.30792		0.21132	0.26949	0.32275
16.8056	0.18657	0.23184	0.29712		0.21118	0.26938	0.32265
16.8315	0.1221	0.24058	0.28601		0.21104	0.26927	0.32255
16.8574	0.13033	0.24275	0.28027		0.2109	0.26916	0.32246
16.8832	0.13358	0.23961	0.29237		0.21076	0.26905	0.32236
16.9091	0.15739	0.29515	0.29474		0.21062	0.26895	0.32226
16.9349	0.18594	0.30533	0.27132		0.21048	0.26884	0.32216
16.9608	0.18015	0.30255	0.26216		0.21034	0.26873	0.32207
16.9866	0.23304	0.30283	0.25206		0.2102	0.26862	0.32197
17.0125	0.26575	0.28493	0.23809		0.21006	0.26852	0.32187
17.0383	0.23847	0.28852	0.28174		0.20993	0.26841	0.32178
17.0642	0.26712	0.30847	0.32147		0.20979	0.2683	0.32168
17.09	0.26158	0.28845	0.35089		0.20965	0.2682	0.32158
17.1159	0.30436	0.33068	0.37685		0.20952	0.26809	0.32149
17.1417	0.30161	0.34365	0.44359		0.20938	0.26798	0.32139
17.1676	0.29694	0.35474	0.45424		0.20925	0.26788	0.3213
17.1935	0.26245	0.34555	0.42014		0.20911	0.26777	0.3212
17.2193	0.18389	0.30066	0.38852		0.20898	0.26767	0.3211
17.2452	0.16865	0.31329	0.35113		0.20884	0.26756	0.32101
17.271	0.15393	0.28202	0.30376		0.20871	0.26746	0.32091
17.2969	0.14166	0.28182	0.2911		0.20857	0.26735	0.32082
17.3227	0.16275	0.26961	0.26915		0.20844	0.26725	0.32072
17.3486	0.2347	0.27524	0.24921		0.20831	0.26714	0.32063
17.3744	0.25367	0.33704	0.25338		0.20817	0.26704	0.32053
17.4003	0.28345	0.31784	0.26429		0.20804	0.26694	0.32044
17.4261	0.29778	0.3433	0.26181		0.20791	0.26683	0.32034
17.452	0.2794	0.35232	0.2821		0.20778	0.26673	0.32025
17.4779	0.2541	0.34239	0.30242		0.20765	0.26663	0.32015
17.5037	0.22316	0.3232	0.31897		0.20752	0.26652	0.32006
17.5296	0.23042	0.29933	0.31262		0.20739	0.26642	0.31996
17.5554	0.19883	0.28252	0.32578		0.20726	0.26632	0.31987
17.5813	0.18994	0.26759	0.31508		0.20713	0.26622	0.31978
17.6071	0.18864	0.29399	0.30034		0.207	0.26612	0.31968
17.633	0.16257	0.33041	0.28345		0.20687	0.26601	0.31959
17.6589	0.19149	0.33035	0.25837		0.20674	0.26591	0.31949
17.6847	0.19473	0.37963	0.25179		0.20661	0.26581	0.3194
17.7106	0.16951	0.34878	0.27923		0.20648	0.26571	0.31931
17.7364	0.15541	0.34946	0.31912		0.20635	0.26561	0.31921
17.7623	0.16515	0.28518	0.30933		0.20623	0.26551	0.31912
17.7881	0.16549	0.26544	0.31582		0.2061	0.26541	0.31903
17.814	0.09553	0.24954	0.33425		0.20597	0.26531	0.31894
17.8398	0.13725	0.23377	0.32118		0.20585	0.26521	0.31884
17.8657	0.11356	0.23934	0.31307		0.20572	0.26511	0.31875
17.8915	0.11738	0.23905	0.2906		0.20559	0.26501	0.31866
17.9174	0.13571	0.26923	0.24711		0.20547	0.26491	0.31856
17.9432	0.17483	0.25731	0.25219		0.20534	0.26481	0.31847
17.9691	0.18051	0.25367	0.28037		0.20522	0.26471	0.31838
17.995	0.21918	0.24735	0.33797		0.20509	0.26462	0.31829
18.0208	0.26482	0.23636	0.35662		0.20497	0.26452	0.3182
18.0467	0.29277	0.25175	0.36063		0.20485	0.26442	0.3181
18.0725	0.29979	0.2572	0.35819		0.20472	0.26432	0.31801
18.0984	0.36275	0.23575	0.35615		0.2046	0.26423	0.31792
18.1242	0.31865	0.21248	0.30436		0.20448	0.26413	0.31783
18.1501	0.28809	0.21191	0.24844		0.20435	0.26403	0.31774
18.1759	0.24808	0.23849	0.23808		0.20423	0.26393	0.31765
18.2018	0.185	0.22403	0.25788		0.20411	0.26384	0.31756
18.2277	0.12903	0.24319	0.27095		0.20399	0.26374	0.31746
18.2535	0.12839	0.23247	0.30032		0.20387	0.26364	0.31737
18.2794	0.11009	0.23413	0.33949		0.20375	0.26355	0.31728
18.3052	0.14764	0.20755	0.30535		0.20363	0.26345	0.31719
18.3311	0.17554	0.16709	0.30115		0.20351	0.26336	0.3171
18.3569	0.20084	0.12706	0.32616		0.20339	0.26326	0.31701
18.3828	0.19814	0.13292	0.29644		0.20327	0.26317	0.31692
18.4086	0.2324	0.1879	0.32709		0.20315	0.26307	0.31683
18.4345	0.21186	0.22763	0.35432		0.20303	0.26298	0.31674
18.4603	0.22157	0.26199	0.34619		0.20291	0.26288	0.31665
18.4862	0.23548	0.2662	0.34917		0.20279	0.26279	0.31656
18.5121	0.26363	0.28279	0.33574		0.20267	0.26269	0.31647
18.5379	0.2109	0.28306	0.32709		0.20256	0.2626	0.31638
18.5638	0.18952	0.28903	0.31254		0.20244	0.26251	0.31629
18.5896	0.20903	0.25739	0.33471		0.20232	0.26241	0.3162
18.6155	0.17867	0.2407	0.36183		0.20221	0.26232	0.31611
18.6413	0.21579	0.2589	0.38165		0.20209	0.26223	0.31602
18.6672	0.23799	0.26279	0.38718		0.20197	0.26213	0.31594
18.693	0.25866	0.22419	0.37534		0.20186	0.26204	0.31585
18.7189	0.31133	0.22575	0.37317		0.20174	0.26195	0.31576
18.7447	0.31228	0.21536	0.36015		0.20163	0.26186	0.31567
18.7706	0.29906	0.2377	0.33042		0.20151	0.26176	0.31558
18.7965	0.21372	0.2901	0.29545		0.2014	0.26167	0.31549
18.8223	0.20869	0.34577	0.28626		0.20128	0.26158	0.3154
18.8482	0.20738	0.35455	0.27421		0.20117	0.26149	0.31532
18.874	0.156	0.38049	0.28177		0.20106	0.2614	0.31523
18.8999	0.18717	0.37864	0.31011		0.20094	0.26131	0.31514
18.9257	0.16659	0.3629	0.31349		0.20083	0.26122	0.31505
18.9516	0.18238	0.3407	0.33233		0.20072	0.26113	0.31496
18.9774	0.15101	0.32524	0.3517		0.2006	0.26104	0.31488
19.0033	0.13483	0.27629	0.34716		0.20049	0.26095	0.31479
19.0292	0.07036	0.25332	0.33557		0.20038	0.26086	0.3147
19.055	0.0177	0.26425	0.30912		0.20027	0.26077	0.31461
19.0809	0.03373	0.28197	0.30653		0.20016	0.26068	0.31453
19.1067	0.05755	0.27245	0.33298		0.20005	0.26059	0.31444
19.1326	0.09295	0.29616	0.34766		0.19994	0.2605	0.31435
19.1584	0.14693	0.33794	0.35333		0.19983	0.26041	0.31427
19.1843	0.15999	0.38296	0.3796		0.19972	0.26032	0.31418
19.2101	0.17706	0.39186	0.34014		0.19961	0.26023	0.31409
19.236	0.18116	0.34397	0.34836		0.1995	0.26014	0.31401
19.2618	0.21003	0.32586	0.32372		0.19939	0.26006	0.31392
19.2877	0.20095	0.30475	0.31327		0.19928	0.25997	0.31383
19.3136	0.19661	0.30007	0.33236		0.19917	0.25988	0.31375
19.3394	0.21489	0.31013	0.37397		0.19906	0.25979	0.31366
19.3653	0.25906	0.30554	0.39168		0.19895	0.25971	0.31358
19.3911	0.28777	0.34057	0.39985		0.19885	0.25962	0.31349
19.417	0.2677	0.37539	0.41365		0.19874	0.25953	0.31341
19.4428	0.24532	0.38627	0.47225		0.19863	0.25944	0.31332
19.4687	0.2188	0.38144	0.42666		0.19853	0.25936	0.31323
19.4945	0.23078	0.34427	0.42641		0.19842	0.25927	0.31315
19.5204	0.19721	0.35102	0.35904		0.19831	0.25919	0.31306
19.5463	0.19484	0.29275	0.35952		0.19821	0.2591	0.31298
19.5721	0.18647	0.26522	0.34644		0.1981	0.25901	0.31289
19.598	0.17276	0.23762	0.31044		0.198	0.25893	0.31281
19.6238	0.2	0.2386	0.32258		0.19789	0.25884	0.31272
19.6497	0.20182	0.26857	0.3348		0.19779	0.25876	0.31264
19.6755	0.20344	0.23728	0.3199		0.19768	0.25867	0.31255
19.7014	0.19174	0.25882	0.33886		0.19758	0.25859	0.31247
19.7272	0.1661	0.26223	0.33873		0.19747	0.2585	0.31239
19.7531	0.19172	0.26061	0.32401		0.19737	0.25842	0.3123
19.7789	0.15854	0.27901	0.28901		0.19727	0.25833	0.31222
19.8048	0.15715	0.26687	0.30737		0.19716	0.25825	0.31213
19.8306	0.16253	0.29202	0.281		0.19706	0.25817	0.31205
19.8565	0.12775	0.28798	0.2566		0.19696	0.25808	0.31197
19.8824	0.13783	0.32411	0.31103		0.19686	0.258	0.31188
19.9082	0.13492	0.31709	0.29326		0.19675	0.25792	0.3118
19.9341	0.17485	0.25606	0.30689		0.19665	0.25783	0.31172
19.9599	0.17167	0.22022	0.30923		0.19655	0.25775	0.31163
19.9858	0.18656	0.16526	0.35556		0.19645	0.25767	0.31155
20.0116	0.21862	0.149	0.34733		0.19635	0.25758	0.31147
20.0375	0.23872	0.15115	0.35842		0.19625	0.2575	0.31138
20.0633	0.21725	0.20582	0.33773		0.19615	0.25742	0.3113
20.0892	0.20623	0.25565	0.33155		0.19605	0.25734	0.31122
20.1151	0.17676	0.28115	0.30732		0.19595	0.25726	0.31113
20.1409	0.14878	0.32832	0.32077		0.19585	0.25717	0.31105
20.1668	0.13832	0.3027	0.32931		0.19575	0.25709	0.31097
20.1926	0.12376	0.29678	0.35528		0.19565	0.25701	0.31089
20.2185	0.15071	0.24159	0.35249		0.19555	0.25693	0.3108
20.2443	0.15127	0.24138	0.3455		0.19545	0.25685	0.31072
20.2702	0.17709	0.23638	0.31829		0.19535	0.25677	0.31064
20.296	0.22501	0.21618	0.28509		0.19526	0.25669	0.31056
20.3219	0.24799	0.22072	0.25746		0.19516	0.25661	0.31048
20.3478	0.26493	0.23985	0.25186		0.19506	0.25653	0.31039
20.3736	0.25206	0.20741	0.22864		0.19496	0.25645	0.31031
20.3995	0.23006	0.22001	0.24759		0.19487	0.25637	0.31023
20.4253	0.2521	0.2197	0.25452		0.19477	0.25629	0.31015
20.4512	0.20076	0.24273	0.23259		0.19467	0.25621	0.31007
20.477	0.21372	0.25891	0.26576		0.19458	0.25613	0.30999
20.5029	0.1964	0.28755	0.26467		0.19448	0.25605	0.30991
20.5287	0.18822	0.30318	0.30683		0.19439	0.25597	0.30983
20.5546	0.16299	0.28381	0.28112		0.19429	0.25589	0.30974
20.5804	0.16559	0.26691	0.31413		0.19419	0.25581	0.30966
20.6063	0.15933	0.2521	0.28665		0.1941	0.25574	0.30958
20.6321	0.12063	0.19421	0.305		0.19401	0.25566	0.3095
20.658	0.15008	0.1902	0.29332		0.19391	0.25558	0.30942
20.6839	0.13416	0.19496	0.25512		0.19382	0.2555	0.30934
20.7097	0.13562	0.21945	0.24787		0.19372	0.25542	0.30926
20.7356	0.20399	0.23407	0.28942		0.19363	0.25535	0.30918
20.7614	0.23495	0.21364	0.29777		0.19354	0.25527	0.3091
20.7873	0.27722	0.22141	0.32984		0.19344	0.25519	0.30902
20.8131	0.26504	0.24421	0.32203		0.19335	0.25511	0.30894
20.839	0.2757	0.25122	0.32954		0.19326	0.25504	0.30886
20.8648	0.22616	0.22787	0.30673		0.19316	0.25496	0.30878
20.8907	0.18487	0.23915	0.28417		0.19307	0.25488	0.3087
20.9166	0.14959	0.22496	0.26866		0.19298	0.25481	0.30862
20.9424	0.12436	0.26162	0.25137		0.19289	0.25473	0.30854
20.9683	0.16003	0.29839	0.26488		0.1928	0.25466	0.30846
20.9941	0.17431	0.28092	0.28062		0.19271	0.25458	0.30839
21.02	0.17255	0.237	0.27922		0.19262	0.2545	0.30831
21.0458	0.20329	0.21896	0.30926		0.19252	0.25443	0.30823
21.0717	0.12492	0.23241	0.32792		0.19243	0.25435	0.30815
21.0975	0.18331	0.25452	0.32783		0.19234	0.25428	0.30807
21.1234	0.18982	0.27306	0.33342		0.19225	0.2542	0.30799
21.1492	0.28034	0.32143	0.33716		0.19216	0.25413	0.30791
21.1751	0.26775	0.31714	0.33857		0.19208	0.25405	0.30784
21.201	0.26559	0.36561	0.3236		0.19199	0.25398	0.30776
21.2268	0.27387	0.38145	0.32149		0.1919	0.2539	0.30768
21.2527	0.21679	0.34523	0.35985		0.19181	0.25383	0.3076
21.2785	0.20217	0.28787	0.33287		0.19172	0.25376	0.30752
21.3044	0.18435	0.22428	0.35859		0.19163	0.25368	0.30744
21.3302	0.1561	0.16981	0.32982		0.19154	0.25361	0.30737
21.3561	0.22193	0.12302	0.317		0.19146	0.25354	0.30729
21.3819	0.189	0.1304	0.3193		0.19137	0.25346	0.30721
21.4078	0.23076	0.13475	0.313		0.19128	0.25339	0.30713
21.4337	0.1532	0.14475	0.25978		0.19119	0.25332	0.30706
21.4595	0.04298	0.19675	0.26128		0.19111	0.25324	0.30698
21.4854	0.01026	0.2318	0.25504		0.19102	0.25317	0.3069
21.5112	0.03164	0.27346	0.26314		0.19093	0.2531	0.30683
21.5371	0.09787	0.3183	0.25403		0.19085	0.25303	0.30675
21.5629	0.14993	0.31896	0.28438		0.19076	0.25295	0.30667
21.5888	0.23835	0.2975	0.2729		0.19068	0.25288	0.3066
21.6146	0.2817	0.28178	0.28291		0.19059	0.25281	0.30652
21.6405	0.27237	0.32379	0.3044		0.19051	0.25274	0.30644
21.6663	0.29229	0.3536	0.28666		0.19042	0.25267	0.30637
21.6922	0.19203	0.39788	0.30717		0.19034	0.2526	0.30629
21.7181	0.12179	0.41997	0.32436		0.19025	0.25252	0.30621
21.7439	0.12073	0.40266	0.28381		0.19017	0.25245	0.30614
21.7698	0.17047	0.42513	0.26857		0.19008	0.25238	0.30606
21.7956	0.19455	0.39244	0.30076		0.19	0.25231	0.30598
21.8215	0.19344	0.33675	0.31499		0.18991	0.25224	0.30591
21.8473	0.2804	0.2629	0.35218		0.18983	0.25217	0.30583
21.8732	0.33029	0.22322	0.341		0.18975	0.2521	0.30576
21.899	0.34458	0.23108	0.38986		0.18967	0.25203	0.30568
21.9249	0.24531	0.24958	0.39737		0.18958	0.25196	0.30561
21.9507	0.24296	0.29238	0.38344		0.1895	0.25189	0.30553
21.9766	0.3527	0.33088	0.36098		0.18942	0.25182	0.30546
22.0025	0.39903	0.32595	0.30959		0.18934	0.25175	0.30538
22.0283	0.38521	0.33647	0.28562		0.18925	0.25168	0.30531
22.0542	0.40319	0.32291	0.27873		0.18917	0.25161	0.30523
22.08	0.33806	0.3125	0.25473		0.18909	0.25154	0.30516
22.1059	0.33796	0.30518	0.2728		0.18901	0.25148	0.30508
22.1317	0.30127	0.29622	0.2403		0.18893	0.25141	0.30501
22.1576	0.25425	0.2871	0.23864		0.18885	0.25134	0.30493
22.1834	0.16224	0.23138	0.21649		0.18877	0.25127	0.30486
22.2093	0.19592	0.24295	0.16319		0.18869	0.2512	0.30478
22.2352	0.23357	0.23772	0.20562		0.18861	0.25113	0.30471
22.261	0.23305	0.20301	0.27226		0.18853	0.25107	0.30463
22.2869	0.21934	0.19709	0.29652		0.18845	0.251	0.30456
22.3127	0.21791	0.20297	0.34419		0.18837	0.25093	0.30449
22.3386	0.21278	0.19407	0.33623		0.18829	0.25086	0.30441
22.3644	0.26353	0.24595	0.34516		0.18821	0.2508	0.30434
22.3903	0.29406	0.31094	0.29009		0.18813	0.25073	0.30427
22.4161	0.29527	0.26905	0.19576		0.18805	0.25066	0.30419
22.442	0.3088	0.24383	0.13542		0.18797	0.25059	0.30412
22.4678	0.26921	0.23558	0.09845		0.18789	0.25053	0.30404
22.4937	0.25719	0.2031	0.13397		0.18782	0.25046	0.30397
22.5195	0.21868	0.21555	0.20633		0.18774	0.25039	0.3039
22.5454	0.1485	0.2488	0.26615		0.18766	0.25033	0.30383
22.5713	0.09707	0.26499	0.32159		0.18758	0.25026	0.30375
22.5971	0.13032	0.2363	0.33989		0.18751	0.2502	0.30368
22.623	0.13813	0.28587	0.3382		0.18743	0.25013	0.30361
22.6488	0.14848	0.3093	0.33937		0.18735	0.25006	0.30353
22.6747	0.1867	0.24182	0.31614		0.18728	0.25	0.30346
22.7005	0.16222	0.21318	0.28624		0.1872	0.24993	0.30339
22.7264	0.21186	0.19107	0.26514		0.18712	0.24987	0.30332
22.7523	0.1608	0.18225	0.28178		0.18705	0.2498	0.30324
22.7781	0.1512	0.21613	0.27029		0.18697	0.24974	0.30317
22.804	0.22831	0.23744	0.2921		0.1869	0.24967	0.3031
22.8298	0.29358	0.2651	0.27618		0.18682	0.24961	0.30303
22.8557	0.38892	0.24291	0.28255		0.18675	0.24954	0.30296
22.8815	0.41534	0.29239	0.29109		0.18667	0.24948	0.30288
22.9074	0.3378	0.27785	0.31279		0.1866	0.24942	0.30281
22.9332	0.34304	0.2932	0.34915		0.18652	0.24935	0.30274
22.9591	0.25299	0.24533	0.33356		0.18645	0.24929	0.30267
22.9849	0.25108	0.27453	0.3115		0.18637	0.24922	0.3026
23.0108	0.11526	0.25507	0.30199		0.1863	0.24916	0.30253
23.0367	0.08533	0.26426	0.21283		0.18623	0.2491	0.30245
23.0625	0.14467	0.30789	0.2146		0.18615	0.24903	0.30238
23.0884	0.12256	0.32801	0.14906		0.18608	0.24897	0.30231
23.1142	0.18672	0.29335	0.15473		0.18601	0.24891	0.30224
23.1401	0.17013	0.31235	0.20163		0.18593	0.24884	0.30217
23.1659	0.13361	0.26986	0.26475		0.18586	0.24878	0.3021
23.1918	0.24251	0.26433	0.33709		0.18579	0.24872	0.30203
23.2176	0.22311	0.1734	0.34585		0.18571	0.24866	0.30196
23.2435	0.22125	0.20703	0.36508		0.18564	0.24859	0.30189
23.2693	0.15892	0.18541	0.39201		0.18557	0.24853	0.30182
23.2952	0.14731	0.23072	0.36092		0.1855	0.24847	0.30175
23.321	0.22832	0.26871	0.40331		0.18543	0.24841	0.30168
23.3469	0.21032	0.2369	0.31181		0.18536	0.24835	0.30161
23.3728	0.24336	0.23102	0.2923		0.18528	0.24828	0.30154
23.3986	0.24401	0.2287	0.25979		0.18521	0.24822	0.30147
23.4245	0.25281	0.21098	0.26061		0.18514	0.24816	0.3014
23.4503	0.22955	0.21398	0.21462		0.18507	0.2481	0.30133
23.4762	0.08131	0.18473	0.20349		0.185	0.24804	0.30126
23.502	0.03785	0.2499	0.2318		0.18493	0.24798	0.30119
23.5279	-0.033	0.2294	0.25132		0.18486	0.24792	0.30112
23.5538	0.01297	0.20075	0.25506		0.18479	0.24786	0.30105
23.5796	0.07364	0.20691	0.31084		0.18472	0.2478	0.30098
23.6055	0.11199	0.26367	0.32146		0.18465	0.24774	0.30091
23.6313	0.15864	0.25219	0.43659		0.18458	0.24768	0.30084
23.6572	0.16518	0.26078	0.48721		0.18451	0.24762	0.30077
23.683	0.15462	0.31561	0.51728		0.18444	0.24756	0.3007
23.7089	0.1126	0.31454	0.49267		0.18438	0.2475	0.30063
23.7347	0.0436	0.3065	0.46506		0.18431	0.24744	0.30056
23.7606	0.07543	0.35511	0.42174		0.18424	0.24738	0.30049
23.7864	0.09878	0.30892	0.36965		0.18417	0.24732	0.30043
23.8123	0.15283	0.26309	0.31817		0.1841	0.24726	0.30036
23.8381	0.26968	0.27572	0.27484		0.18403	0.2472	0.30029
23.864	0.37254	0.27224	0.26084		0.18397	0.24714	0.30022
23.8899	0.4377	0.20621	0.32641		0.1839	0.24708	0.30015
23.9157	0.38318	0.23294	0.32744		0.18383	0.24702	0.30008
23.9416	0.3444	0.20934	0.29374		0.18377	0.24696	0.30002
23.9674	0.22013	0.18582	0.2519		0.1837	0.2469	0.29995
23.9933	0.11966	0.1918	0.23506		0.18363	0.24685	0.29988
24.0191	-0.01317	0.22748	0.25413		0.18356	0.24679	0.29981
24.045	-0.01034	0.24711	0.29138		0.1835	0.24673	0.29974
24.0708	-0.00892	0.29964	0.30581		0.18343	0.24667	0.29968
24.0967	0.07959	0.29451	0.31081		0.18337	0.24661	0.29961
24.1226	0.10346	0.30644	0.27039		0.1833	0.24656	0.29954
24.1484	0.20102	0.33815	0.29044		0.18323	0.2465	0.29947
24.1743	0.22625	0.37798	0.30361		0.18317	0.24644	0.29941
24.2001	0.24231	0.33955	0.29298		0.1831	0.24638	0.29934
24.226	0.20734	0.31766	0.22786		0.18304	0.24633	0.29927
24.2518	0.1505	0.28358	0.22211		0.18297	0.24627	0.29921
24.2777	0.07952	0.24933	0.29297		0.18291	0.24621	0.29914
24.3035	0.0576	0.25489	0.32802		0.18284	0.24615	0.29907
24.3294	0.05216	0.21855	0.31149		0.18278	0.2461	0.29901
24.3553	0.03716	0.15555	0.2646		0.18271	0.24604	0.29894
24.3811	0.01219	0.10377	0.27723		0.18265	0.24598	0.29887
24.407	0.05149	0.11063	0.28415		0.18259	0.24593	0.29881
24.4328	0.08715	0.09824	0.32456		0.18252	0.24587	0.29874
24.4587	0.10602	0.10234	0.31801		0.18246	0.24582	0.29867
24.4845	0.10956	0.07881	0.28459		0.1824	0.24576	0.29861
24.5104	0.11012	0.06554	0.31615		0.18233	0.2457	0.29854
24.5362	0.13152	0.07799	0.36329		0.18227	0.24565	0.29847
24.5621	0.04563	0.09482	0.37056		0.18221	0.24559	0.29841
24.5879	0.09445	0.10989	0.33314		0.18214	0.24554	0.29834
24.6138	0.05708	0.19034	0.315		0.18208	0.24548	0.29828
24.6396	0.09223	0.18355	0.3438		0.18202	0.24543	0.29821
24.6655	0.11591	0.26566	0.30986		0.18196	0.24537	0.29814
24.6914	0.0869	0.27841	0.38094		0.18189	0.24532	0.29808
24.7172	0.14754	0.32826	0.41913		0.18183	0.24526	0.29801
24.7431	0.16876	0.25843	0.38411		0.18177	0.24521	0.29795
24.7689	0.15406	0.20403	0.37321		0.18171	0.24515	0.29788
24.7948	0.14767	0.17073	0.34011		0.18165	0.2451	0.29782
24.8206	0.07832	0.13932	0.36896		0.18159	0.24504	0.29775
24.8465	0.07309	0.13577	0.36418		0.18153	0.24499	0.29769
24.8723	0.12065	0.16172	0.361		0.18146	0.24494	0.29762
24.8982	0.20106	0.13675	0.32898		0.1814	0.24488	0.29756
24.9241	0.27246	0.18724	0.34023		0.18134	0.24483	0.29749
24.9499	0.25547	0.22617	0.41032		0.18128	0.24477	0.29743
24.9758	0.29541	0.2967	0.46075		0.18122	0.24472	0.29736
25.0016	0.23276	0.30322	0.40416		0.18116	0.24467	0.2973
25.0275	0.14137	0.33131	0.40468		0.1811	0.24461	0.29723
25.0533	0.16798	0.34427	0.34323		0.18104	0.24456	0.29717
25.0792	0.12094	0.33819	0.31899		0.18098	0.24451	0.29711
25.105	0.06396	0.30781	0.28703		0.18092	0.24445	0.29704
25.1309	0.09795	0.28072	0.22696		0.18086	0.2444	0.29698
25.1567	0.14732	0.25427	0.22163		0.1808	0.24435	0.29691
25.1826	0.19934	0.2869	0.22758		0.18075	0.2443	0.29685
25.2085	0.16015	0.30441	0.28763		0.18069	0.24424	0.29679
25.2343	0.18529	0.29415	0.32404		0.18063	0.24419	0.29672
25.2602	0.0833	0.24416	0.31139		0.18057	0.24414	0.29666
25.286	0.00445	0.21516	0.35251		0.18051	0.24409	0.29659
25.3119	0.0782	0.214	0.3315		0.18045	0.24403	0.29653
25.3377	0.03669	0.20896	0.38533		0.18039	0.24398	0.29647
25.3636	-0.02699	0.2272	0.39175		0.18034	0.24393	0.2964
25.3894	-0.06122	0.26645	0.36162		0.18028	0.24388	0.29634
25.4153	-0.02081	0.32715	0.43143		0.18022	0.24383	0.29628
25.4412	0.00621	0.38115	0.40826		0.18016	0.24377	0.29621
25.467	-0.01221	0.39233	0.43502		0.18011	0.24372	0.29615
25.4929	0.0787	0.36029	0.4201		0.18005	0.24367	0.29609
25.5187	0.05601	0.32578	0.38103		0.17999	0.24362	0.29603
25.5446	0.02378	0.30136	0.34584		0.17994	0.24357	0.29596
25.5704	0.10427	0.26905	0.31583		0.17988	0.24352	0.2959
25.5963	0.12869	0.23713	0.32024		0.17982	0.24347	0.29584
25.6221	0.02326	0.27152	0.24691		0.17977	0.24342	0.29578
25.648	0.0843	0.26796	0.26875		0.17971	0.24337	0.29571
25.6738	0.16284	0.29006	0.31178		0.17965	0.24332	0.29565
25.6997	0.20226	0.26931	0.25028		0.1796	0.24327	0.29559
25.7255	0.22199	0.33133	0.33494		0.17954	0.24322	0.29553
25.7514	0.31075	0.32428	0.38986		0.17949	0.24317	0.29546
25.7773	0.35986	0.32762	0.38102		0.17943	0.24312	0.2954
25.8031	0.28931	0.3054	0.33178		0.17937	0.24307	0.29534
25.829	0.27898	0.25349	0.31737		0.17932	0.24302	0.29528
25.8548	0.24866	0.19507	0.2602
25.8807	0.10721	0.1917	0.22466
25.9065	0.17429	0.13098	0.22979
25.9324	0.11365	0.18216	0.11826
25.9582	0.00717	0.17575	0.10406
25.9841	0.05739	0.22633	0.18947
26.0099	0.11508	0.23979	0.2961
26.0358	0.13516	0.2884	0.35841
26.0617	0.14227	0.30963	0.40726
26.0875	0.11907	0.30772	0.38156
26.1134	0.1957	0.28752	0.35756
26.1392	0.13434	0.3118	0.29151
26.1651	0.2009	0.32213	0.27843
26.1909	0.15771	0.31231	0.1796
26.2168	0.13731	0.27441	0.20595
26.2427	0.20256	0.31206	0.23068
26.2685	0.29044	0.28953	0.27871
26.2944	0.23133	0.28405	0.28038
26.3202	0.28866	0.24681	0.32617
26.3461	0.20305	0.17542	0.24489
26.3719	0.17897	0.14719	0.24527
26.3978	0.04805	0.15884	0.21234
26.4236	-0.02545	0.17822	0.27765
26.4495	-0.0927	0.1664	0.28317
26.4753	-0.17972	0.22731	0.32361
26.5012	-0.10412	0.31211	0.36835
26.527	-0.00486	0.34758	0.33019
26.5529	0.03649	0.40106	0.35003
26.5788	0.17699	0.37562	0.37374
26.6046	0.16201	0.29697	0.32347
26.6305	0.09424	0.30219	0.34692
26.6563	0.09052	0.28396	0.33443
26.6822	0.04948	0.30913	0.31121
26.708	-0.000777841	0.26332	0.32255
26.7339	0.00955	0.24403	0.31519
26.7597	0.06133	0.26883	0.31886
26.7856	0.22559	0.32807	0.32534
26.8115	0.30425	0.33818	0.32567
26.8373	0.3464	0.35391	0.35105
26.8632	0.32347	0.33529	0.38141
26.889	0.20476	0.3604	0.46015
26.9149	0.1243	0.30914	0.40935
26.9407	-0.00225	0.26688	0.40376
26.9666	-0.07019	0.18241	0.40117
26.9924	-0.04733	0.11164	0.37398
27.0183	-0.01903	0.08337	0.3287
27.0441	0.11067	0.14023	0.29004
27.07	0.07595	0.1681	0.24276
27.0959	0.16909	0.18685	0.2618
27.1217	0.24945	0.17355	0.25372
27.1476	0.29923	0.1995	0.24857
27.1734	0.25657	0.2101	0.16658
27.1993	0.25155	0.20602	0.21736
27.2251	0.32552	0.20877	0.1747
27.251	0.35881	0.17783	0.22329
27.2768	0.30372	0.2196	0.23255
27.3027	0.28402	0.28775	0.29064
27.3285	0.26324	0.25744	0.35624
27.3544	0.32303	0.2243	0.36045
27.3803	0.27324	0.21352	0.36406
27.4061	0.24494	0.213	0.3459
27.432	0.16186	0.23338	0.28564
27.4578	0.0499	0.17253	0.31931
27.4837	0.01693	0.12921	0.25095
27.5095	0.01323	0.05821	0.29708
27.5354	-0.06984	0.04432	0.31574
27.5612	0.17461	-0.01262	0.35971
27.5871	0.21455	0.01051	0.35066
27.613	0.2995	0.05345	0.35755
27.6388	0.39213	0.10784	0.40038
27.6647	0.36297	0.20822	0.40326
27.6905	0.38307	0.31157	0.35047
27.7164	0.34159	0.35463	0.35561
27.7422	0.2937	0.38489	0.29301
27.7681	0.26231	0.34492	0.24756
27.7939	0.13724	0.30604	0.23741
27.8198	0.18599	0.24704	0.21378
27.8456	0.14758	0.20059	0.22389
27.8715	0.13515	0.15405	0.2587
27.8974	0.24595	0.1441	0.32431
27.9232	0.25334	0.11007	0.36927
27.9491	0.3739	0.16226	0.40544
27.9749	0.39024	0.16095	0.46837
28.0008	0.29792	0.11746	0.51644
28.0266	0.21589	0.16471	0.52837
28.0525	0.12362	0.20436	0.53514
28.0783	0.138	0.25282	0.45783
28.1042	0.18364	0.26204	0.41926
28.1301	0.07735	0.35291	0.34643
28.1559	0.12694	0.39404	0.27658
28.1818	0.23008	0.40312	0.21426
28.2076	0.33806	0.39134	0.22491
28.2335	0.30081	0.30973	0.22355
28.2593	0.31397	0.20403	0.20774
28.2852	0.46685	0.1714	0.18432
28.311	0.59303	0.13325	0.16262
28.3369	0.62945	0.14518	0.14697
28.3627	0.605	0.19192	0.13406
28.3886	0.39052	0.24994	0.12065
28.4144	0.31052	0.28331	0.17023
28.4403	0.2297	0.2836	0.21391
28.4662	0.16875	0.24788	0.29577
28.492	-0.00714	0.25296	0.32159
28.5179	0.08348	0.23974	0.27662
28.5437	0.24696	0.19391	0.31327
28.5696	0.26156	0.20114	0.37128
28.5954	0.23093	0.24878	0.43201
28.6213	0.16518	0.28955	0.3699
28.6471	0.19309	0.28801	0.40615
28.673	0.33546	0.29745	0.44943
28.6989	0.39763	0.26461	0.41637
28.7247	0.39855	0.34165	0.32349
28.7506	0.34102	0.34548	0.32941
28.7764	0.40691	0.36472	0.29239
28.8023	0.42637	0.24182	0.34311
28.8281	0.34185	0.18403	0.346
28.854	0.25171	0.19384	0.3692
28.8798	0.0852	0.17324	0.33676
28.9057	0.16628	0.22028	0.32884
28.9316	0.27203	0.21772	0.29282
28.9574	0.32598	0.21458	0.25075
28.9833	0.37371	0.38805	0.15681
29.0091	0.38158	0.35709	0.21178
29.035	0.40754	0.28998	0.25781
29.0608	0.39671	0.2111	0.27991
29.0867	0.34388	0.18826	0.30804
29.1125	0.29108	0.16739	0.2789
29.1384	0.15845	0.14393	0.33678
29.1642	0.24083	0.10647	0.35029
29.1901	0.19687	0.04739	0.40828
29.2159	0.20981	0.08836	0.38581
29.2418	0.29604	0.22566	0.34321
29.2677	0.25477	0.21373	0.29641
29.2935	0.32753	0.20947	0.33456
29.3194	0.32769	0.33548	0.33516
29.3452	0.34974	0.34989	0.33794
29.3711	0.36336	0.32297	0.30129
29.3969	0.3986	0.29417	0.40327
29.4228	0.39737	0.19637	0.42535
29.4487	0.28024	0.1309	0.46898
29.4745	0.28101	0.13587	0.43185
29.5004	0.24786	0.1838	0.37581
29.5262	0.08133	0.20355	0.35442
29.5521	0.1607	0.24875	0.38068
29.5779	0.20141	0.3394	0.35975
29.6038	0.2264	0.28817	0.25407
29.6296	0.20888	0.27131	0.25028
29.6555	0.30511	0.19875	0.2595
29.6813	0.28942	0.15965	0.27065
29.7072	0.2821	0.11155	0.26257
29.733	0.3134	0.17844	0.18219
29.7589	0.2783	0.29054	0.14885
29.7848	0.21429	0.34078	0.18727
29.8106	0.22043	0.40274	0.18578
29.8365	0.24374	0.36553	0.09323
29.8623	0.19851	0.36359	0.01332
29.8882	0.07228	0.36368	0.05884
29.914	0.14017	0.33685	0.12041
29.9399	0.1035	0.39028	0.15685
29.9657	0.09673	0.40949	0.17027
29.9916	0.19773	0.46057	0.18772
30.0175	0.14233	0.41324	0.20089
30.0433	0.2431	0.29085	0.31785
30.0692	0.25382	0.1516	0.31063
30.095	0.31479	0.06666	0.28545
30.1209	0.23375	0.08839	0.29187
30.1467	0.17455	0.11036	0.33344
30.1726	0.172	0.14273	0.34993
30.1984	0.20191	0.24573	0.37111
30.2243	0.22734	0.32305	0.35499
30.2502	0.34098	0.35349	0.36472
30.276	0.2569	0.26802	0.35194
30.3019	0.26036	0.27572	0.42157
30.3277	0.2626	0.23615	0.3269
30.3536	0.17156	0.29497	0.30321
30.3794	0.02077	0.29962	0.22753
30.4053	-0.08606	0.28305	0.19174
30.4311	-0.16615	0.21547	0.15573
30.457	-0.03427	0.18129	0.20004
30.4828	0.04281	0.16569	0.22794
30.5087	0.19994	0.16176	0.25346
30.5345	0.1535	0.17208	0.27881
30.5604	0.08112	0.27996	0.35699
30.5863	0.1692	0.36171	0.35125
30.6121	0.19943	0.45953	0.34717
30.638	0.12808	0.4689	0.34712
30.6638	0.06128	0.42476	0.3517
30.6897	-0.0143	0.32043	0.35769
30.7155	0.0125	0.25841	0.41276
30.7414	-0.02263	0.27102	0.39858
30.7672	0.01864	0.26579	0.37275
30.7931	0.08568	0.27465	0.32635
30.819	0.17846	0.29759	0.25939
30.8448	0.297	0.33461	0.17187
30.8707	0.4413	0.38572	0.06378
	--	--	--
	--	--	--
	--	--	--
	--	--	--
	--	--	--
	--	--	--
	--	--	--
	--	--	--
	--	--	--
	--	--	--
	--	--	--
	--	--	--
	--	--	--
	--	--	--
	--	--	--
	--	--	--
	--	--	--
	--	--	--
	--	--	--
	--	--	--
	--	--	--
	--	--	--
	--	--	--
	--	--	--
	--	--	--
	--	--	--
	--	--	--
	--	--	--
	--	--	--
	--	--	--
	--	--	--
	--	--	--
	--	--	--
	--	--	--
	--	--	--
	--	--	--
	--	--	--
	--	--	--
	--	--	--
	--	--	--
	--	--	--
	--	--	--
	--	--	--
	--	--	--
	--	--	--
	--	--	--
	--	--	--
	--	--	--
	--	--	--
	--	--	--
	--	--	--
	--	--	--
	--	--	--
	--	--	--
	--	--	--
	--	--	--
	--	--	--
	--	--	--
	--	--	--
	--	--	--
	--	--	--
	--	--	--
	--	--	--
	--	--	--
	--	--	--
	--	--	--
	--	--	--
	--	--	--
	--	--	--
	--	--	--
	--	--	--
	--	--	--
	--	--	--
	--	--	--
	--	--	--
	--	--	--
	--	--	--
	--	--	--
	--	--	--
	--	--	--
	--	--	--
	--	--	--
	--	--	--
	--	--	--
	--	--	--
	--	--	--
	--	--	--
	--	--	--
	--	--	--
	--	--	--
	--	--	--
	--	--	--
	--	--	--
	--	--	--
	--	--	--
	--	--	--
	--	--	--
	--	--	--
	--	--	--
	--	--	--
	--	--	--
	--	--	--
	--	--	--
	--	--	--
	--	--	--
	--	--	--
	--	--	--
	--	--	--
	--	--	--
	--	--	--
	--	--	--
	--	--	--
	--	--	--
	--	--	--
	--	--	--
	--	--	--
	--	--	--
	--	--	--
	--	--	--
	--	--	--
	--	--	--
	--	--	--
	--	--	--
	--	--	--
	--	--	--
	--	--	--
	--	--	--
	--	--	--
	--	--	--
	--	--	--
	--	--	--
	--	--	--
	--	--	--
	--	--	--
	--	--	--
	--	--	--
	--	--	--
	--	--	--
	--	--	--
	--	--	--
	--	--	--
	--	--	--
	--	--	--
	--	--	--
	--	--	--
	--	--	--
	--	--	--
	--	--	--
	--	--	--
	--	--	--
	--	--	--
	--	--	--
	--	--	--
	--	--	--
	--	--	--
	--	--	--
	--	--	--
	--	--	--
	--	--	--
	--	--	--
	--	--	--
	--	--	--
	--	--	--
	--	--	--
	--	--	--
	--	--	--
	--	--	--
	--	--	--
	--	--	--
	--	--	--
	--	--	--
	--	--	--
	--	--	--
	--	--	--
	--	--	--
	--	--	--
	--	--	--
	--	--	--
	--	--	--
	--	--	--
	--	--	--
	--	--	--
	--	--	--
	--	--	--
	--	--	--
	--	--	--
	--	--	--
	--	--	--
	--	--	--
	--	--	--
	--	--	--
	--	--	--
	--	--	--
	--	--	--
	--	--	--
	--	--	--
	--	--	--
	--	--	--
	--	--	--
	--	--	--
	--	--	--
	--	--	--
	--	--	--
	--	--	--
	--	--	--
	--	--	--
	--	--	--
	--	--	--
	--	--	--
	--	--	--
	--	--	--
	--	--	--
	--	--	--
	--	--	--
	--	--	--
	--	--	--
	--	--	--
	--	--	--
	--	--	--
	--	--	--
	--	--	--
	--	--	--
	--	--	--
	--	--	--
	--	--	--
	--	--	--
	--	--	--
	--	--	--
	--	--	--
	--	--	--
	--	--	--
	--	--	--
	--	--	--
	--	--	--
	--	--	--
	--	--	--
	--	--	--
	--	--	--
	--	--	--
	--	--	--
	--	--	--
	--	--	--
	--	--	--
	--	--	--
	--	--	--
	--	--	--
	--	--	--
	--	--	--
	--	--	--
	--	--	--
	--	--	--
	--	--	--
	--	--	--
	--	--	--
	--	--	--
	--	--	--
	--	--	--
	--	--	--
	--	--	--
	--	--	--
	--	--	--
	--	--	--
	--	--	--
	--	--	--
	--	--	--
	--	--	--
	--	--	--
	--	--	--
	--	--	--
	--	--	--
	--	--	--
	--	--	--
	--	--	--
	--	--	--
	--	--	--
	--	--	--
	--	--	--
	--	--	--
	--	--	--
	--	--	--
	--	--	--
	--	--	--
	--	--	--
	--	--	--
	--	--	--
	--	--	--
	--	--	--
	--	--	--
	--	--	--
	--	--	--
	--	--	--
	--	--	--
	--	--	--
	--	--	--
	--	--	--
	--	--	--
	--	--	--
	--	--	--
	--	--	--
	--	--	--
	--	--	--
	--	--	--
	--	--	--
	--	--	--
	--	--	--
	--	--	--
	--	--	--
	--	--	--
	--	--	--
	--	--	--
	--	--	--
	--	--	--
	--	--	--
	--	--	--
	--	--	--
	--	--	--
	--	--	--
	--	--	--
	--	--	--
	--	--	--
	--	--	--
	--	--	--
	--	--	--
	--	--	--
	--	--	--
	--	--	--
	--	--	--
	--	--	--
	--	--	--
	--	--	--
	--	--	--
	--	--	--
	--	--	--
	--	--	--
	--	--	--
	--	--	--
	--	--	--
	--	--	--
	--	--	--
	--	--	--
	--	--	--
	--	--	--
	--	--	--
	--	--	--
	--	--	--
	--	--	--
	--	--	--
	--	--	--
	--	--	--
	--	--	--
	--	--	--
	--	--	--
	--	--	--
	--	--	--
	--	--	--
	--	--	--
	--	--	--
	--	--	--
	--	--	--
	--	--	--
	--	--	--
	--	--	--
	--	--	--
	--	--	--
	--	--	--
	--	--	--
	--	--	--
	--	--	--
	--	--	--
	--	--	--
	--	--	--
	--	--	--
	--	--	--
	--	--	--
	--	--	--
	--	--	--
	--	--	--
	--	--	--
	--	--	--
	--	--	--
	--	--	--
	--	--	--
	--	--	--
	--	--	--
	--	--	--
	--	--	--
	--	--	--
	--	--	--
	--	--	--
	--	--	--
	--	--	--
	--	--	--
	--	--	--
	--	--	--
	--	--	--
	--	--	--
	--	--	--
	--	--	--
	--	--	--
	--	--	--
	--	--	--
	--	--	--
	--	--	--
	--	--	--
	--	--	--
	--	--	--
	--	--	--
	--	--	--
	--	--	--
	--	--	--
	--	--	--
	--	--	--
	--	--	--
	--	--	--
	--	--	--
	--	--	--
	--	--	--
	--	--	--
	--	--	--
	--	--	--
	--	--	--
	--	--	--
	--	--	--
	--	--	--
	--	--	--
	--	--	--
	--	--	--
	--	--	--
	--	--	--
	--	--	--
	--	--	--
	--	--	--
	--	--	--
	--	--	--
	--	--	--
	--	--	--
	--	--	--
	--	--	--
	--	--	--
	--	--	--
	--	--	--
	--	--	--
	--	--	--
	--	--	--
	--	--	--
	--	--	--
	--	--	--
	--	--	--
	--	--	--
	--	--	--
	--	--	--
	--	--	--
	--	--	--
	--	--	--
	--	--	--
	--	--	--
	--	--	--
	--	--	--
	--	--	--
	--	--	--
	--	--	--
	--	--	--
	--	--	--
	--	--	--
	--	--	--
	--	--	--
	--	--	--
	--	--	--
	--	--	--
	--	--	--
	--	--	--
	--	--	--
	--	--	--
	--	--	--
	--	--	--
	--	--	--
	--	--	--
	--	--	--
	--	--	--
	--	--	--
	--	--	--
	--	--	--
	--	--	--
	--	--	--
	--	--	--
	--	--	--
	--	--	--
	--	--	--
	--	--	--
	--	--	--
	--	--	--
	--	--	--
	--	--	--
	--	--	--
	--	--	--
	--	--	--
	--	--	--
	--	--	--
	--	--	--
	--	--	--
	--	--	--
	--	--	--
	--	--	--
	--	--	--
	--	--	--
	--	--	--
	--	--	--
	--	--	--
	--	--	--
	--	--	--
	--	--	--
	--	--	--
	--	--	--
	--	--	--
	--	--	--
	--	--	--
	--	--	--
	--	--	--
	--	--	--
	--	--	--
	--	--	--
	--	--	--
	--	--	--
	--	--	--
	--	--	--
	--	--	--
	--	--	--
	--	--	--
	--	--	--
	--	--	--
	--	--	--
	--	--	--
	--	--	--
	--	--	--
	--	--	--
	--	--	--
	--	--	--
	--	--	--
	--	--	--
	--	--	--
	--	--	--
	--	--	--
	--	--	--
	--	--	--
	--	--	--
	--	--	--
	--	--	--
	--	--	--
	--	--	--
	--	--	--
	--	--	--
	--	--	--
	--	--	--
	--	--	--
	--	--	--
	--	--	--
	--	--	--
	--	--	--
	--	--	--
	--	--	--
	--	--	--
	--	--	--
	--	--	--
	--	--	--
	--	--	--
	--	--	--
	--	--	--
	--	--	--
	--	--	--
	--	--	--
	--	--	--
	--	--	--
	--	--	--
	--	--	--
	--	--	--
	--	--	--
	--	--	--
	--	--	--
	--	--	--
	--	--	--
	--	--	--
	--	--	--
	--	--	--
	--	--	--
	--	--	--
	--	--	--
	--	--	--
	--	--	--
	--	--	--
	--	--	--
	--	--	--
	--	--	--
	--	--	--
	--	--	--
	--	--	--
	--	--	--
	--	--	--
	--	--	--
	--	--	--
	--	--	--
	--	--	--
	--	--	--
	--	--	--
	--	--	--
	--	--	--
	--	--	--
	--	--	--
	--	--	--
	--	--	--
	--	--	--
	--	--	--
	--	--	--
	--	--	--
	--	--	--
	--	--	--
	--	--	--
	--	--	--
	--	--	--
	--	--	--
	--	--	--
	--	--	--
	--	--	--
	--	--	--
	--	--	--
	--	--	--
	--	--	--
	--	--	--
	--	--	--
	--	--	--
	--	--	--
	--	--	--
	--	--	--
	--	--	--
	--	--	--
	--	--	--
	--	--	--
	--	--	--
	--	--	--
	--	--	--
	--	--	--
	--	--	--
	--	--	--
	--	--	--
	--	--	--
	--	--	--
	--	--	--
	--	--	--
	--	--	--
	--	--	--
	--	--	--
	--	--	--
	--	--	--
	--	--	--
	--	--	--
	--	--	--
	--	--	--
	--	--	--
	--	--	--
	--	--	--
	--	--	--
	--	--	--
	--	--	--
	--	--	--
	--	--	--
	--	--	--
	--	--	--
	--	--	--
	--	--	--
	--	--	--
	--	--	--
	--	--	--
	--	--	--
	--	--	--
	--	--	--
	--	--	--
	--	--	--
	--	--	--
	--	--	--
	--	--	--
	--	--	--
	--	--	--
	--	--	--
	--	--	--
	--	--	--
	--	--	--
	--	--	--
	--	--	--
	--	--	--
	--	--	--
	--	--	--
	--	--	--
	--	--	--
	--	--	--
	--	--	--
	--	--	--
	--	--	--
	--	--	--
	--	--	--
	--	--	--
	--	--	--
	--	--	--
	--	--	--
	--	--	--
	--	--	--
	--	--	--
	--	--	--
	--	--	--
	--	--	--
	--	--	--
	--	--	--
	--	--	--
	--	--	--
	--	--	--
	--	--	--
	--	--	--
	--	--	--
	--	--	--
	--	--	--
	--	--	--
	--	--	--
	--	--	--
	--	--	--
	--	--	--
	--	--	--
	--	--	--
	--	--	--
	--	--	--
	--	--	--
	--	--	--
	--	--	--
	--	--	--
	--	--	--
	--	--	--
	--	--	--
	--	--	--
	--	--	--
	--	--	--
	--	--	--
	--	--	--
	--	--	--
	--	--	--
	--	--	--
	--	--	--
	--	--	--
	--	--	--
	--	--	--
	--	--	--
	--	--	--
	--	--	--
	--	--	--
	--	--	--
	--	--	--
	--	--	--
	--	--	--
	--	--	--
	--	--	--
	--	--	--
	--	--	--
	--	--	--
	--	--	--
	--	--	--
	--	--	--
	--	--	--
	--	--	--
	--	--	--
	--	--	--
	--	--	--
	--	--	--
	--	--	--
	--	--	--
	--	--	--
	--	--	--
	--	--	--
	--	--	--
	--	--	--
	--	--	--
	--	--	--
	--	--	--
	--	--	--
	--	--	--
	--	--	--
	--	--	--
	--	--	--
	--	--	--
	--	--	--
	--	--	--
	--	--	--
	--	--	--
	--	--	--
	--	--	--
	--	--	--
	--	--	--
	--	--	--
	--	--	--
	--	--	--
	--	--	--
	--	--	--
	--	--	--
	--	--	--
	--	--	--
	--	--	--
[truncated: 1,525 more rows]
