# Supplementary material for: Exploring the role of macromolecular crowding and TNFR1 in cell volume control
Source: eLife journal article supplement (doi:10.7554/elife.92719), 2024-09-19
Supplement: fig1-data1 [file FigS1A.xlsx]

## Sheet: Sheet1
Lag Time	Correlation	Fit	Correlation	Fit	Correlation	Fit	Correlation	Fit		[EGFP]	N	Total Intensity
τ in s	G(τ)	G(τ)	G(τ)	G(τ)	G(τ)	G(τ)	G(τ)	G(τ)		% dilution	=1/(G\-(0)-1)
	0.0005	0.0005	0.001	0.001	0.00125	0.00125	0.00167	0.00167		0.05	12.1944	788.877
1e-06	1.07342	1.08302	1.03261	1.02813	1.02279	1.02229	1.01909	1.01829		0.1	35.7107	1559.25
1.2e-06	1.09573	1.08279	1.02903	1.02807	1.02452	1.02224	1.0189	1.01826		0.125	45.4468	1870.37
1.4e-06	1.11777	1.08255	1.0373	1.02802	1.03927	1.02219	1.01839	1.01823		0.16667	55.5611	2338.28
1.6e-06	1.08293	1.08232	1.03841	1.02797	1.03472	1.02214	1.0167	1.01819
1.8e-06	1.0648	1.08209	1.03013	1.02792	1.02843	1.02209	1.01817	1.01816
2e-06	1.0968	1.08186	1.02268	1.02786	1.00326	1.02204	1.01758	1.01812
2.2e-06	1.10461	1.08163	1.03951	1.02781	1.04296	1.02199	1.01784	1.01809
2.4e-06	1.0943	1.08141	1.03896	1.02776	1.03732	1.02195	1.01734	1.01805
2.6e-06	1.09537	1.08118	1.0133	1.02771	1.02322	1.0219	1.02054	1.01802
2.8e-06	1.09501	1.08095	1.02875	1.02766	1.02409	1.02185	1.01753	1.01799
3e-06	1.07653	1.08073	1.0362	1.02761	0.99415	1.0218	1.01764	1.01795
3.2e-06	1.07297	1.08051	1.0213	1.02756	1.0217	1.02176	1.0181	1.01792
3.6e-06	1.04471	1.08007	1.04904	1.02745	1.01454	1.02166	1.01982	1.01785
4e-06	1.07973	1.07963	1.03041	1.02735	1.0204	1.02157	1.0175	1.01779
4.4e-06	1.08826	1.0792	1.01413	1.02725	1.01454	1.02148	1.01643	1.01772
4.8e-06	1.07475	1.07877	1.03166	1.02715	1.02072	1.02138	1.01715	1.01766
5.2e-06	1.09502	1.07835	1.03538	1.02705	1.03179	1.02129	1.01709	1.01759
5.6e-06	1.06977	1.07794	1.01303	1.02696	1.01563	1.0212	1.01984	1.01753
6e-06	1.05999	1.07752	0.99951	1.02686	1.03439	1.02111	1.01718	1.01746
6.4e-06	1.09288	1.07711	1.038	1.02676	1.01292	1.02103	1.01748	1.0174
7.2e-06	1.06835	1.07631	1.02655	1.02657	1.02701	1.02085	1.01702	1.01727
8e-06	1.08319	1.07553	1.01047	1.02638	1.01671	1.02068	1.0166	1.01715
8.8e-06	1.07671	1.07476	1.0311	1.0262	1.01676	1.02051	1.01791	1.01702
9.6e-06	1.08186	1.074	1.03862	1.02601	1.02256	1.02034	1.01666	1.0169
1.04e-05	1.06177	1.07327	1.01468	1.02583	1.01362	1.02018	1.01652	1.01678
1.12e-05	1.06524	1.07255	1.00668	1.02565	1.02354	1.02002	1.01658	1.01667
1.2e-05	1.06115	1.07184	1.03172	1.02547	1.0083	1.01986	1.01742	1.01655
1.28e-05	1.08185	1.07115	1.03076	1.0253	1.02506	1.0197	1.01657	1.01643
1.44e-05	1.0611	1.06981	1.00664	1.02496	1.01351	1.01939	1.01575	1.01621
1.6e-05	1.07461	1.06853	1.0283	1.02463	1.00711	1.0191	1.01559	1.01599
1.76e-05	1.06817	1.06729	1.02889	1.0243	1.0185	1.01881	1.01544	1.01577
1.92e-05	1.07443	1.06611	1.02275	1.02399	1.02135	1.01853	1.01469	1.01556
2.08e-05	1.07008	1.06498	1.01754	1.02368	1.00942	1.01825	1.01567	1.01536
2.24e-05	1.06501	1.06388	1.02223	1.02338	1.01883	1.01799	1.01481	1.01516
2.4e-05	1.07194	1.06284	1.02464	1.02308	1.0201	1.01773	1.01507	1.01496
2.56e-05	1.07109	1.06183	1.03237	1.0228	1.02067	1.01748	1.01533	1.01477
2.88e-05	1.06512	1.05992	1.01717	1.02224	1.01999	1.017	1.01367	1.0144
3.2e-05	1.05334	1.05816	1.02795	1.02171	1.0121	1.01654	1.01394	1.01406
3.52e-05	1.05239	1.05652	1.01989	1.02121	1.01845	1.01611	1.0139	1.01372
3.84e-05	1.05302	1.055	1.01901	1.02073	1.01682	1.01569	1.01307	1.01341
4.16e-05	1.04793	1.05358	1.02849	1.02026	1.01061	1.0153	1.01266	1.0131
4.48e-05	1.03923	1.05225	1.01421	1.01982	1.0154	1.01493	1.01299	1.01281
4.8e-05	1.04489	1.05101	1.01287	1.0194	1.01308	1.01457	1.01271	1.01254
5.12e-05	1.04758	1.04985	1.02605	1.01899	1.01552	1.01423	1.01218	1.01227
5.76e-05	1.04679	1.04774	1.0218	1.01822	1.01538	1.01359	1.01178	1.01178
6.4e-05	1.05124	1.04586	1.00977	1.01751	1.01577	1.013	1.01139	1.01133
7.04e-05	1.04394	1.04418	1.01831	1.01685	1.00873	1.01246	1.01103	1.01092
7.68e-05	1.0444	1.04267	1.01923	1.01623	1.01197	1.01196	1.01081	1.01053
8.32e-05	1.03869	1.0413	1.0106	1.01566	1.01164	1.0115	1.01035	1.01018
8.96e-05	1.04683	1.04005	1.01578	1.01512	1.01082	1.01107	1.01004	1.00986
9.6e-05	1.04269	1.0389	1.01989	1.01462	1.01034	1.01066	1.00971	1.00956
0.0001024	1.04212	1.03785	1.01471	1.01415	1.01028	1.01029	1.00937	1.00928
0.0001152	1.04213	1.03595	1.01317	1.01329	1.00941	1.00961	1.00886	1.00878
0.000128	1.03267	1.03428	1.01101	1.01252	1.00892	1.00901	1.00829	1.00835
0.0001408	1.02971	1.0328	1.01011	1.01183	1.00887	1.00848	1.00839	1.00797
0.0001536	1.03255	1.03147	1.01196	1.01121	1.0076	1.008	1.00782	1.00763
0.0001664	1.03231	1.03025	1.00779	1.01064	1.01103	1.00757	1.00743	1.00732
0.0001792	1.02802	1.02914	1.01079	1.01013	1.00849	1.00718	1.00696	1.00705
0.000192	1.02638	1.0281	1.01292	1.00966	1.00815	1.00683	1.00704	1.00681
0.0002048	1.02651	1.02714	1.00865	1.00923	1.00655	1.0065	1.00634	1.00658
0.0002304	1.0261	1.02541	1.00872	1.00847	1.00671	1.00593	1.00625	1.00619
0.000256	1.02456	1.02388	1.00671	1.00782	1.00586	1.00545	1.00565	1.00584
0.0002816	1.01722	1.02252	1.00691	1.00725	1.00717	1.00503	1.00542	1.00555
0.0003072	1.0205	1.0213	1.00774	1.00675	1.00643	1.00467	1.00526	1.00528
0.0003328	1.01831	1.02019	1.00715	1.00632	1.00476	1.00436	1.00517	1.00504
0.0003584	1.01767	1.01919	1.00574	1.00593	1.00417	1.00408	1.00464	1.00482
0.000384	1.0168	1.01828	1.00652	1.00558	1.00489	1.00383	1.00448	1.00462
0.0004096	1.01576	1.01744	1.00477	1.00527	1.00583	1.0036	1.00425	1.00444
0.0004608	1.01327	1.01597	1.00513	1.00473	1.00445	1.00322	1.00373	1.00412
0.000512	1.01422	1.0147	1.00414	1.00428	1.00359	1.0029	1.00373	1.00383
0.0005632	1.01379	1.01361	1.00431	1.0039	1.00249	1.00264	1.00343	1.00358
0.0006144	1.00968	1.01266	1.00547	1.00358	1.00285	1.00241	1.00322	1.00336
0.0006656	1.01389	1.01182	1.00496	1.00331	1.00171	1.00222	1.00297	1.00317
0.0007168	1.01267	1.01108	1.00492	1.00306	1.00208	1.00205	1.00281	1.00299
0.000768	1.01207	1.01042	1.00384	1.00285	1.00224	1.0019	1.00292	1.00283
0.0008192	1.01014	1.00982	1.00494	1.00266	1.00256	1.00177	1.00258	1.00269
0.0009216	1.00993	1.0088	1.00399	1.00235	1.00187	1.00156	1.00236	1.00244
0.00102	1.00722	1.00795	1.00423	1.00209	1.00101	1.00138	1.00211	1.00223
0.00113	1.00753	1.00724	1.00401	1.00188	1.00289	1.00124	1.00203	1.00204
0.00123	1.00738	1.00663	1.00131	1.0017	1.00134	1.00112	1.00184	1.00189
0.00133	1.00584	1.00611	1.00234	1.00155	1.0018	1.00102	1.00182	1.00175
0.00143	1.00683	1.00566	1.00262	1.00142	1.00135	1.00093	1.00165	1.00163
0.00154	1.00535	1.00526	1.00221	1.00131	1.001	1.00085	1.00167	1.00153
0.00164	1.00322	1.00491	1.00142	1.00121	1.0001	1.00079	1.00157	1.00143
0.00184	1.006	1.00431	1.00285	1.00105	1.00053	1.00068	1.00138	1.00127
0.00205	1.00593	1.00383	1.00252	1.00092	1.00169	1.0006	1.00136	1.00114
0.00225	1.00589	1.00344	1.0014	1.00082	1.00059	1.00053	1.00119	1.00103
0.00246	1.00481	1.00311	1.00076	1.00073	1.00098	1.00047	1.00107	1.00094
0.00266	1.00572	1.00283	1.00127	1.00066	1.0014	1.00043	1.00113	1.00086
0.00287	1.00505	1.00259	0.99977	1.0006	1.00137	1.00039	1.00105	1.00079
0.00307	1.00638	1.00239	1.00158	1.00055	1.00088	1.00035	1.00096	1.00073
0.00328	1.00576	1.00221	1.00141	1.00051	1.00173	1.00032	1.00089	1.00068
0.00369	1.00398	1.00191	1.00016	1.00043	1.00099	1.00028	1.00087	1.0006
0.0041	1.00174	1.00168	1.00076	1.00038	1.00021	1.00024	1.00076	1.00053
0.00451	1.00332	1.00149	0.99982	1.00033	1.00009	1.00021	1.00066	1.00047
0.00492	1.00176	1.00133	1.00057	1.00029	1.00045	1.00019	1.00059	1.00042
0.00532	1.00149	1.0012	0.99956	1.00026	1.00051	1.00017	1.00062	1.00038
0.00573	1.00098	1.00109	1.00076	1.00024	1.00127	1.00015	1.00056	1.00035
0.00614	1.00196	1.00099	1	1.00022	1.00143	1.00014	1.00057	1.00032
0.00655	1.00005	1.00091	0.99897	1.0002	1.00088	1.00012	1.00044	1.0003
0.00737	1.00217	1.00078	1.00051	1.00017	1.00033	1.00011	1.00042	1.00025
0.00819	1.00294	1.00068	1.0001	1.00014	0.99978	1.00009	1.00033	1.00022
0.00901	1.00237	1.00059	0.99942	1.00013	1.00057	1.00008	1.00032	1.0002
0.00983	0.99979	1.00053	0.99889	1.00011	1.00039	1.00007	1.00028	1.00017
0.01065	1.00008	1.00047	0.99949	1.0001	1.00052	1.00006	1.00019	1.00016
0.01147	0.99955	1.00043	0.99983	1.00009	0.99976	1.00006	1.00023	1.00014
0.01229	0.99957	1.00039	0.99961	1.00008	1.00042	1.00005	1.00019	1.00013
0.01311	1.00065	1.00035	1.00017	1.00007	1.00007	1.00005	1.00022	1.00012
0.01475	0.999	1.0003	0.99983	1.00006	0.99978	1.00004	1.00016	1.0001
0.01638	0.99965	1.00026	1.00068	1.00005	1.00023	1.00003	1.00017	1.00009
0.01802	0.99985	1.00023	1.00018	1.00005	0.99991	1.00003	1.00017	1.00008
0.01966	1.00076	1.0002	0.99942	1.00004	1.00038	1.00003	1.00016	1.00007
0.0213	0.99951	1.00018	0.99931	1.00004	0.99994	1.00002	1.00011	1.00006
0.02294	1.00114	1.00016	0.9997	1.00003	1.00022	1.00002	1.00009	1.00005
0.02458	1.0002	1.00014	1.00057	1.00003	0.99978	1.00002	1.00003	1.00005
0.02621	0.99974	1.00013	1	1.00003	1.00064	1.00002	1.0001	1.00004
0.02949	0.99902	1.00011	1.00027	1.00002	1.00022	1.00001	1.00013	1.00004
0.03277	0.99896	1.0001	1.00035	1.00002	0.99961	1.00001	1.00012	1.00003
0.03604	0.9989	1.00008	0.99987	1.00002	1.00021	1.00001	1.00011	1.00003
0.03932	0.99969	1.00007	0.99961	1.00001	1.00003	1.00001	1.00007	1.00003
0.0426	0.99932	1.00006	0.99964	1.00001	1.00003	1.00001	1.00007	1.00002
0.04588	0.99961	1.00006	0.99953	1.00001	0.99975	1.00001	1.00008	1.00002
0.04915	1.00017	1.00005	0.99923	1.00001	1.00007	1.00001	1.00009	1.00002
0.05243	0.99964	1.00005	0.99934	1.00001	1.00027	1.00001	1.0001	1.00002
0.05898	1.00022	1.00004	1.00001	1.00001	1.0002	1.00001	1.00006	1.00001
0.06554	1.00044	1.00003	1.00017	1.00001	0.99986	1	1.00003	1.00001
0.07209	1.00031	1.00003	1.00007	1.00001	1.00007	1	1.00008	1.00001
0.07864	0.99967	1.00003	0.99974	1.00001	0.99975	1	1.00003	1.00001
0.0852	1.00046	1.00002	1.00049	1	1.00009	1	1.00003	1.00001
0.09175	0.99941	1.00002	0.99998	1	0.99973	1	0.99999	1.00001
0.0983	1.00096	1.00002	0.99962	1	0.99997	1	1.00001	1.00001
0.10486	0.99937	1.00002	0.99991	1	0.9999	1	1.00003	1.00001
0.11796	0.99914	1.00001	0.99999	1	0.99998	1	1.00002	1.00001
0.13107	0.99939	1.00001	1.00027	1	0.99965	1	1.00001	1
0.14418	1.00117	1.00001	1.00024	1	0.99988	1	0.99996	1
0.15729	1.00073	1.00001	1.00023	1	1.00002	1	0.99995	1
0.17039	1.00056	1.00001	1.00024	1	1.00012	1	1.00001	1
0.1835	0.99995	1.00001	0.9998	1	1.00001	1	0.99999	1
0.19661	0.99984	1.00001	0.99977	1	0.99992	1	0.99999	1
0.20972	1.00027	1.00001	1.00007	1	1.00025	1	1	1
0.23593	1.00006	1.00001	1.00004	1	1.00023	1	1	1
0.26214	0.99989	1	0.99976	1	1.00002	1	0.99997	1
0.28836	0.99963	1	1.00026	1	1.00013	1	0.99995	1
0.31457	1.00021	1	0.99999	1	0.99987	1	0.99994	1
0.34079	1.0006	1	0.99983	1	0.99993	1	0.99994	1
0.367	0.99979	1	1.00004	1	0.99984	1	0.99995	1
0.39322	0.99995	1	0.99972	1	0.99997	1	0.99998	1
0.41943	1.00008	1	0.99982	1	0.99991	1	0.99997	1
