# Supplementary material for: Exploring the role of macromolecular crowding and TNFR1 in cell volume control
Source: eLife journal article supplement (doi:10.7554/elife.92719), 2024-09-19
Supplement: fig2-data1 [file elife-92719-fig2-data1-v2.zip]

## Sheet: Sheet1
Hoechst	Anisotropy
Mean Intensity
32483.3	0.15046
30378	0.15128
31975.3	0.15262
31064.4	0.1531
34601.5	0.1536
33469.6	0.15403
32119.3	0.15415
41009.4	0.15429
32066.9	0.15451
37762.3	0.15455
32996	0.1547
30800.4	0.15478
36927.7	0.15519
29654.5	0.15567
31518.1	0.15615
35141.5	0.15638
33936.4	0.15714
33564	0.15719
33290	0.15739
31039.6	0.15767
31267.8	0.15795
30081.9	0.15815
40093.2	0.15843
33976.5	0.15852
29926.7	0.15873
31887.9	0.159
34083.3	0.15903
32243.3	0.15905
31369.3	0.1591
33122.5	0.15934
36624.2	0.15973
30814.1	0.1598
32809.5	0.15997
31943.2	0.16032
33721.3	0.16036
30920.2	0.16038
36670	0.16044
29284.3	0.16059
36419.1	0.16064
32251.7	0.16092
38113.5	0.16104
30949	0.16108
32083.4	0.16117
32601.6	0.16142
31429.2	0.16153
32336.7	0.16174
33754.3	0.16181
43264.6	0.16207
32290.1	0.16214
31225	0.16256
30859	0.16279
30544	0.16284
29857	0.16293
35424.9	0.16294
32234.4	0.16303
34746.9	0.16322
39811	0.1634
32852.7	0.16342
33910.9	0.16375
32781.9	0.16395
37535.3	0.16395
33463.3	0.16407
30424.5	0.16425
34946.1	0.16436
31763.5	0.16451
34955.2	0.16453
31112.2	0.16456
27207.1	0.16461
33426.5	0.16469
33968.9	0.16483
38337.2	0.16488
31622.4	0.16495
33016	0.16505
39639	0.16519
31959.3	0.16543
36440	0.16544
31787.5	0.16551
33441.9	0.1657
34418.1	0.16577
36258.1	0.16583
35633.3	0.16607
39969	0.16613
34515.6	0.16616
33462.1	0.16622
42549	0.16632
28961.9	0.16638
33414.9	0.16654
31060.4	0.16676
29101.6	0.16684
35191.1	0.16685
32991	0.16688
32082.6	0.16694
30082.2	0.16705
32975.8	0.16717
32468.5	0.16721
35917.6	0.16735
31269.6	0.16735
34220.7	0.16737
37037.5	0.16744
37754.7	0.16745
33761.7	0.16747
35103.5	0.16747
30090.7	0.16754
30706.8	0.16758
31878.9	0.1676
31684.3	0.16764
30957.1	0.16764
33529.1	0.16778
30954.5	0.16779
36881.4	0.16784
33882.1	0.16786
36379.4	0.16786
32372.8	0.16787
31985.4	0.16792
34104	0.16809
31968.7	0.16814
30639.3	0.1682
30124.6	0.1682
29959.3	0.16827
31431.3	0.16829
34893.5	0.16831
32473.1	0.16842
32376.4	0.16842
33930.6	0.16851
33457.7	0.16859
31687	0.16872
31909.2	0.16875
30326.2	0.16878
32225	0.16886
33065.7	0.169
33428.5	0.1692
30528.2	0.1692
34689.8	0.16939
37368.4	0.16941
29963.7	0.16944
33054	0.16952
31619.1	0.16967
32265.9	0.16969
33668.5	0.16974
31895.2	0.17
32359.4	0.17
30694.2	0.17008
30156.9	0.17009
30432.9	0.17016
31084.9	0.17016
30163.5	0.1702
29621.7	0.17029
33062.4	0.1703
40814.5	0.17031
33228	0.17034
31320.5	0.17038
33003.2	0.1706
35332.7	0.1706
37557.4	0.1708
30734.8	0.17082
32228.6	0.17084
33094.7	0.17087
40612.4	0.17099
32629.8	0.17102
37220	0.17106
34373.9	0.17111
36020.1	0.17111
34033.8	0.17112
31943.5	0.17117
34154.6	0.17124
42831.9	0.17128
33431.1	0.1713
34402.6	0.17136
31694.7	0.17141
30528.4	0.17152
35877.1	0.17162
36280.1	0.17166
35611	0.17171
33234.3	0.17171
31934.9	0.17189
29482.2	0.17189
30915.8	0.17199
33280.2	0.17211
35800.2	0.17211
36922.2	0.17222
33765.4	0.17231
30675.6	0.1725
32271.2	0.17255
37087.9	0.17269
28435.9	0.17271
38868.5	0.17273
38603.2	0.17273
30359.8	0.17275
34417.7	0.17281
33843.7	0.17284
36650.7	0.17296
34360.6	0.17302
39620.6	0.17303
33222.3	0.17303
30049.9	0.17304
31732.1	0.17318
35177.7	0.1732
43832.6	0.17322
33036.6	0.17339
33048.7	0.1734
32896.8	0.17349
30055.4	0.17358
35297.4	0.17366
31869.2	0.17371
32405.5	0.17374
37489.3	0.17375
33473.7	0.17379
30042.1	0.17395
33655	0.17395
33091.8	0.17399
33230.3	0.174
31766.3	0.174
33608.8	0.17414
52781.2	0.17416
37827	0.17428
33334.1	0.17431
32735.7	0.17432
36791.4	0.17432
30918.3	0.17441
32620.1	0.17445
31918.2	0.17445
30368.4	0.1745
34035.3	0.17453
35161.6	0.17458
31947.5	0.17463
31808.2	0.17471
37759.3	0.17471
30078.6	0.17481
32843.1	0.17481
31752.4	0.17482
51829.4	0.17488
33771.8	0.17496
32134.2	0.1752
29787.7	0.17525
31216	0.17535
30515.3	0.17539
32205.1	0.17543
30871.7	0.17544
35737.2	0.17544
33307.5	0.1755
35500	0.17552
32983.9	0.17552
31424.1	0.17552
28903.5	0.17561
34104.1	0.17566
30830.8	0.1757
32259.3	0.17572
34534.2	0.17576
33238.8	0.17587
32621.6	0.17589
32786.8	0.17598
37560.8	0.17608
35480.4	0.1761
31307.6	0.17611
30420.9	0.17612
29426.9	0.17621
31239.3	0.17624
31977	0.17627
34364.9	0.17628
31968.4	0.17629
33007.8	0.17629
31348.6	0.17634
32499.2	0.17636
34630.6	0.1765
30723.1	0.17655
33954.7	0.17658
29545.2	0.17667
34518.5	0.17674
33338.4	0.17675
40092.5	0.17684
31166.5	0.1769
33985	0.17703
31810.2	0.17716
49106.6	0.17717
33590.2	0.17719
34168.5	0.17723
32549.4	0.17725
34095.6	0.17729
32245	0.17729
28829.6	0.17731
32585.1	0.1774
35022.9	0.17741
29768.8	0.17743
35436.4	0.17747
32918.1	0.1775
31019.7	0.17762
35930	0.17764
32599.8	0.17779
34265.7	0.17785
32479.1	0.17789
28977.4	0.17791
28184.1	0.17797
29570.1	0.17805
30349.8	0.17806
34747.7	0.17812
32089.2	0.17823
36707.5	0.17833
39967.9	0.17838
33062.2	0.17846
31173.4	0.17849
30389.2	0.17853
32336.4	0.1786
32899.2	0.17861
34669.6	0.17864
40205.9	0.17865
33181.5	0.17868
39625.4	0.17882
31755.1	0.17883
35991.4	0.17901
31300.2	0.17907
30828.5	0.17914
29221.1	0.17914
37225.3	0.17917
35230.8	0.17917
32652.6	0.17921
28675.2	0.17933
38425	0.17938
29011.7	0.17942
27962.6	0.17947
29074.9	0.17947
40759.1	0.17951
32952.7	0.17951
32939	0.17953
39639.6	0.17955
29780.9	0.17957
33255.8	0.17958
37800.8	0.17964
32440.6	0.17966
39625.2	0.17967
34605.6	0.17969
31832.4	0.17976
32293.5	0.17977
36687.1	0.17983
31293.8	0.17985
32165.2	0.17986
30951.9	0.17994
32861.9	0.17995
33712.9	0.17998
39213.5	0.17998
33386.6	0.18002
33574.1	0.18002
38046.3	0.18006
30323.1	0.18013
34311.2	0.18018
35916.8	0.18027
30942.4	0.18031
34241.1	0.18039
38785	0.18039
32142.1	0.1804
30080.1	0.1804
34200.9	0.18044
34312	0.18049
33216.9	0.18057
32101.2	0.18059
39408	0.18059
37072	0.18063
38845.4	0.18065
35747	0.18069
32422.7	0.18069
32716.3	0.18073
30834.7	0.18074
35857.8	0.18078
31061.5	0.18088
35997.3	0.18096
36987.7	0.18096
33706.5	0.18099
30300.1	0.18102
29873.5	0.18103
35789.2	0.18108
38226.5	0.18112
34632.7	0.18115
34474.5	0.18116
31664.2	0.18123
32296.8	0.1813
32457.3	0.1813
36092.2	0.18133
35275.9	0.18146
32529.5	0.18149
32154.1	0.18155
30996.9	0.18156
30188.6	0.18165
31483	0.18171
50500.5	0.18175
32909.9	0.18177
30287.6	0.18181
32053.5	0.18181
35936.6	0.18182
35250.7	0.18184
34775.7	0.18188
33329.4	0.18192
31326.3	0.18197
32852.6	0.18198
42150.2	0.18199
29144.3	0.18199
32621.5	0.18205
30948.3	0.18206
31196	0.18213
32370.8	0.18217
33996.4	0.18223
33453.7	0.18224
31098.9	0.18224
33898.1	0.18228
34506.4	0.18236
30334.8	0.18246
33868.1	0.18251
34180.9	0.18257
35585.1	0.18258
36520.1	0.18259
39980.2	0.18268
32201.3	0.18268
33581.6	0.1828
32034.7	0.18284
33808.3	0.1829
34101.2	0.18297
32397.2	0.18305
32862.5	0.18311
30978.8	0.18312
37677.9	0.18313
39639.1	0.18314
31916.9	0.18321
31453.4	0.18323
30726.4	0.18327
30797.2	0.18328
32057.6	0.18329
29667.9	0.18331
29928.8	0.18334
30719.9	0.18337
29798.8	0.1834
38428.3	0.18344
32809.5	0.18345
35187.9	0.18345
37582.9	0.18351
34345.5	0.18356
34768.3	0.18367
33661.5	0.18367
31426.9	0.18374
32933.4	0.18377
33244	0.18378
31468.5	0.18391
29162.1	0.18392
29746.7	0.184
33485.4	0.18402
32930.1	0.18403
32926.1	0.18407
32108.5	0.1841
41764.9	0.18414
34229.5	0.18415
30995.2	0.18424
34711.6	0.18429
33479.5	0.18429
29784.6	0.18432
34232.6	0.18437
31671.6	0.1844
37970.5	0.1844
33879.3	0.18444
28302.9	0.18444
30333.9	0.18447
32909.1	0.1845
41838.1	0.1845
34488.8	0.18452
34082.5	0.18454
30134.8	0.1846
31731.2	0.18463
36775.8	0.18464
33765.9	0.18465
30033.6	0.1847
32394.7	0.18472
33572.8	0.18475
33737	0.18476
30262.1	0.18482
28410	0.18489
31319	0.18489
33390	0.18489
30759	0.18492
30786	0.18492
34221.2	0.18505
29175.4	0.18507
31757.6	0.18508
31344.6	0.1851
30206.4	0.18514
40908.4	0.18516
35894.3	0.18524
31765.7	0.18524
34908	0.18528
35081	0.18531
36262.9	0.18531
30735.5	0.18539
28911.4	0.18542
31137.8	0.18543
29500.5	0.18553
31164.8	0.18554
30691.3	0.18555
32374.3	0.18555
29256.1	0.18556
34113.1	0.18557
33982.4	0.18561
30755.8	0.18562
34876.7	0.18563
32603	0.18563
31989	0.18563
33270.3	0.18564
32169.5	0.18572
41827.8	0.18572
32067	0.18576
33133.8	0.18581
31423	0.18582
37899.5	0.1859
35963.7	0.18591
37900.5	0.18592
38762.9	0.18593
32366.1	0.18594
35533.9	0.18597
35079.1	0.18602
32843.8	0.18606
33815.8	0.18608
31106.8	0.18612
35477.6	0.18619
34045.1	0.18621
36115.6	0.18636
33290.4	0.18641
35337.1	0.18641
34783.7	0.18652
42263.5	0.18653
38893.2	0.1868
35632.7	0.18683
31559.4	0.18688
30734.5	0.18697
33229.5	0.18703
43194.2	0.18709
38300.8	0.1871
34145	0.18715
31196.3	0.18723
53811.3	0.18725
30057.1	0.18727
33957.1	0.18728
29916.8	0.18732
31512.2	0.18738
37983.9	0.18743
31475.1	0.18744
30784.3	0.18747
33461.3	0.18753
31779.5	0.1876
31732	0.18762
30654.4	0.18766
33073.8	0.18769
34148.1	0.1877
30910.9	0.18776
34413.2	0.18776
33722.2	0.18776
31218.1	0.18777
29664.1	0.18778
28459.1	0.18784
32305.4	0.18787
34179	0.18788
31618.3	0.18789
34326.2	0.1879
32488.2	0.18791
31426.5	0.18795
30739.6	0.18798
32909	0.18804
31117.4	0.18804
29765.3	0.18806
33922.2	0.18824
31357	0.18825
40020.9	0.18825
29315.5	0.18828
32692	0.18832
33816.8	0.18834
29693.9	0.18842
34362.5	0.18845
32102.5	0.18845
34732.4	0.18847
33257	0.18847
32063.3	0.18853
29987.1	0.18857
30035.6	0.1886
35504.8	0.18861
35135.2	0.18862
32689.3	0.18862
35528.1	0.18863
38265.8	0.18866
31716.4	0.1887
32830.2	0.18871
33556.2	0.18874
31354.8	0.18878
30305.5	0.18882
31163.9	0.18887
41396.5	0.18896
30252.9	0.18902
34392.7	0.18902
35126	0.18903
33003	0.18907
29245.4	0.18911
35080.7	0.1892
30622.9	0.18921
33935.7	0.18927
40099.5	0.18949
30071.4	0.18952
31296.3	0.18955
34665.5	0.18964
31337.2	0.18968
36584.7	0.18969
33901.5	0.1897
35737	0.18976
33797	0.18978
32643	0.18979
29199.4	0.1898
35911.9	0.18993
29532.2	0.18996
32915.2	0.18996
31308.9	0.18998
34637.6	0.19001
34393.5	0.19001
31837.7	0.19004
30795.3	0.19006
37103.8	0.19008
32743.4	0.1901
30578.3	0.19013
32269.6	0.19015
31640.9	0.19016
40406.3	0.19016
32955	0.19017
30368.5	0.1902
31958.4	0.1902
31981.6	0.19021
35100.3	0.19022
31246.6	0.19023
29645.8	0.19025
33547.1	0.19026
34250.4	0.19031
33727.3	0.19032
33101.2	0.19039
32484.8	0.1904
30252.5	0.19043
30505.1	0.19044
31681.3	0.19044
32347.7	0.19053
31733.3	0.19054
31984.6	0.19059
33678.5	0.19061
31694.2	0.19063
32144.3	0.19066
31268	0.19066
27484.9	0.19071
32617.9	0.19071
31005.2	0.19074
31840.7	0.19074
30138.4	0.19076
37580.8	0.19082
32151.3	0.19089
35585.9	0.1909
34291.5	0.19099
34038.9	0.19101
30912.7	0.19125
30269.9	0.19126
43406.7	0.19134
33196.1	0.19139
31790.1	0.1914
32840.1	0.19143
30413.5	0.19148
31923.7	0.19149
29916.2	0.19152
34591.1	0.19157
31121.9	0.19159
36888.5	0.19163
31958.9	0.19172
33667	0.19176
30587.6	0.19176
36695.2	0.19182
30457.1	0.19184
33530.8	0.19186
32673.6	0.19187
33856.3	0.19191
31664.8	0.19198
29024.1	0.19199
29429.9	0.19211
34800.9	0.19214
29933.3	0.19214
31732.5	0.1922
31843.6	0.19229
27694.3	0.19229
29893.1	0.19235
31251.6	0.19236
34583.9	0.19236
30459.6	0.19238
30566.1	0.19249
34552.9	0.1925
33089	0.19259
32150.6	0.19262
32139	0.19265
31753.8	0.19272
33501.7	0.19277
34010.7	0.19279
31768.6	0.19283
29906.8	0.19286
33275.2	0.19292
33703.1	0.19294
31252	0.19299
33697.5	0.19301
33328.4	0.19301
34463.1	0.19302
32336.7	0.19308
30583.3	0.1931
32300.1	0.19313
30888.1	0.19321
30889.8	0.19321
30799.5	0.19322
29921.9	0.19324
30471.2	0.19332
29047.9	0.19336
32998.4	0.19343
29300.3	0.19346
34565.7	0.19348
35250.9	0.1935
32204.7	0.19357
31583.1	0.1936
32525.9	0.1936
30750.1	0.19365
31957	0.19376
31381	0.1938
33994.2	0.19382
32826.2	0.1939
33853.5	0.19393
32327.3	0.19395
36325.9	0.19398
33675.8	0.19403
37739.2	0.19409
30300.7	0.19413
36915.3	0.19416
31148.7	0.19423
30364.2	0.1943
29159	0.19436
28140.5	0.19437
32462	0.19442
34590.6	0.19442
32932	0.19442
33345.5	0.19443
31670.9	0.19444
29960.1	0.1945
31961.6	0.19456
35918.3	0.19462
31317.6	0.19467
36434.4	0.19469
34347.2	0.19469
30059.9	0.19471
32062.8	0.19475
34753.7	0.19487
32174.4	0.19489
33924	0.19498
28921.7	0.19502
32564.4	0.19506
36076.6	0.19512
33395.3	0.19525
27649.5	0.19535
32689.4	0.19539
31135.7	0.19557
33123.1	0.19559
31988	0.19565
32475.1	0.19569
31493	0.1957
33235.6	0.19571
32504.5	0.19575
31807.8	0.19582
39965.7	0.19585
30635.8	0.19585
30070.6	0.196
33278.4	0.196
32169	0.19612
35313	0.19619
28779	0.19667
32643.6	0.19668
32862.9	0.19669
30910.8	0.19674
29301.1	0.19683
30485.7	0.19694
28991.2	0.19695
33633	0.19701
34601.2	0.19712
29333.7	0.19715
30644.7	0.19715
29389.9	0.19715
48727	0.19722
32055.5	0.19759
28645.3	0.19766
32059.4	0.1977
31930.7	0.19789
32660.2	0.19819
30790.3	0.19826
32576.5	0.19826
31457.2	0.19827
31036.6	0.19833
34670.4	0.19851
41611	0.19859
42367	0.19859
36746.3	0.19861
34166.1	0.19881
32463.6	0.19911
31786.6	0.19929
31781.8	0.19936
35622	0.19947
31485.4	0.19949
29576.2	0.19967
35408.7	0.19974
31051.6	0.19995
51534.4	0.20022
27887.3	0.20023
37759.2	0.20032
31612.4	0.20035
33806.1	0.20037
32021.9	0.20047
32089.9	0.20084
30948.1	0.20102
36378.1	0.20108
32699.7	0.20114
32264.2	0.20123
29767.1	0.20151
38521	0.20169
29556.2	0.20208
33275.4	0.2022
30602.2	0.20222
34038.7	0.20235
36710.5	0.2025
29298	0.203
32544.7	0.20341
30801.7	0.20356
31840	0.21301
