# Supplementary material for: Exploring the role of macromolecular crowding and TNFR1 in cell volume control
Source: eLife journal article supplement (doi:10.7554/elife.92719), 2024-09-19
Supplement: fig2-data1 [file Fig2B.xlsx]

## Sheet: Sheet1
Anisotropy	Number of Pixels	Number of Pixels	Number of Pixels	Number of Pixels
	Isotonic	Hypertonic	Isotonic	Hypertonic
0.05	26	1	0	0
0.051	33	1	0	0
0.052	48	0	0	0
0.054	32	0	0	0
0.055	46	1	0	0
0.056	54	0	0	0
0.057	69	2	0	0
0.058	60	0	0	0
0.059	69	2	0	0
0.061	90	1	0	0
0.062	96	1	0	0
0.063	98	1	0	0
0.064	103	2	1	0
0.065	135	2	0	1
0.066	134	1	0	1
0.068	124	0	3	0
0.069	149	2	3	0
0.07	159	3	0	0
0.071	174	3	2	1
0.072	214	1	1	1
0.073	190	2	2	1
0.075	201	5	7	1
0.076	222	3	4	0
0.077	233	7	8	0
0.078	248	4	9	2
0.079	271	4	9	1
0.08	249	3	17	0
0.082	306	5	16	1
0.083	319	8	17	1
0.084	362	12	22	0
0.085	334	10	27	0
0.086	402	5	16	1
0.087	437	7	34	2
0.089	420	10	28	4
0.09	457	11	49	5
0.091	498	8	49	0
0.092	478	11	47	7
0.093	524	15	67	5
0.095	548	14	55	5
0.096	591	9	69	4
0.097	662	9	79	10
0.098	653	10	87	3
0.099	641	22	71	7
0.1	709	17	101	9
0.102	690	17	95	10
0.103	733	22	97	6
0.104	718	28	116	13
0.105	738	27	111	10
0.106	760	39	128	13
0.107	782	36	130	16
0.109	779	40	133	9
0.11	847	42	137	12
0.111	789	49	168	20
0.112	834	55	149	13
0.113	802	52	142	21
0.114	849	62	172	28
0.116	782	69	203	19
0.117	815	80	200	17
0.118	777	79	194	32
0.119	764	91	198	22
0.12	792	87	213	22
0.121	795	105	228	32
0.123	810	115	245	38
0.124	751	114	252	28
0.125	744	120	245	45
0.126	717	131	266	36
0.127	725	155	258	37
0.129	695	164	267	41
0.13	716	155	288	41
0.131	690	190	332	46
0.132	744	199	326	57
0.133	729	211	308	42
0.134	767	236	331	45
0.136	708	240	342	49
0.137	737	260	327	57
0.138	765	233	355	65
0.139	768	277	358	74
0.14	738	233	355	75
0.141	768	313	379	62
0.143	785	274	429	70
0.144	796	334	432	84
0.145	767	338	439	97
0.146	782	313	432	84
0.147	768	354	462	97
0.148	748	395	465	97
0.15	746	410	530	96
0.151	780	416	493	105
0.152	806	453	529	108
0.153	791	504	603	119
0.154	784	472	597	119
0.155	780	509	666	117
0.157	844	529	703	129
0.158	805	548	757	106
0.159	803	599	736	147
0.16	743	557	775	130
0.161	754	567	789	152
0.162	771	605	800	138
0.164	814	651	833	158
0.165	821	705	847	184
0.166	810	711	790	175
0.167	797	733	823	198
0.168	877	816	857	205
0.17	820	822	852	191
0.171	867	866	865	228
0.172	893	813	837	227
0.173	899	884	863	250
0.174	859	937	836	252
0.175	971	979	830	261
0.177	856	945	800	294
0.178	943	1008	771	342
0.179	915	1019	683	334
0.18	829	1040	667	367
0.181	768	1069	538	368
0.182	814	1096	449	399
0.184	734	1109	361	414
0.185	635	1112	295	405
0.186	525	1233	210	450
0.187	446	1112	151	468
0.188	376	1198	107	494
0.189	301	1192	74	542
0.191	220	1193	44	517
0.192	183	1238	29	551
0.193	103	1210	24	539
0.194	95	1180	14	619
0.195	55	1217	6	665
0.196	30	1229	4	670
0.198	16	1231	2	674
0.199	7	1281	3	762
0.2	4	1250	0	766
0.201	1	1216	0	840
0.202	3	1258	0	859
0.204	1	1260	0	914
0.205	0	1254	0	925
0.206	1	1317	0	990
0.207	1	1285	0	1010
0.208	0	1287	0	1140
0.209	0	1235	0	1108
0.211	0	1316	0	1158
0.212	0	1261	0	1102
0.213	0	1278	0	1145
0.214	0	1296	0	1136
0.215	0	1339	0	1045
0.216	0	1308	0	1007
0.218	0	1305	0	876
0.219	0	1194	0	869
0.22	0	1084	0	717
0.221	0	1005	0	609
0.222	0	865	0	513
0.223	0	753	0	425
0.225	0	606	0	322
0.226	0	482	0	249
0.227	0	390	0	144
0.228	0	259	0	127
0.229	0	177	0	107
0.23	0	122	0	52
0.232	0	89	0	31
0.233	0	60	0	17
0.234	0	34	0	21
0.235	0	24	0	9
0.236	0	6	0	4
0.237	0	4	0	0
0.239	0	7	0	1
0.24	0	1	0	2
0.241	0	1	0	1
0.242	0	2	0	0
0.243	0	1	0	0
0.245	0	0	0	0
0.246	0	0	0	0
0.247	0	0	0	0
0.248	0	0	0	0
0.249	0	0	0	0
0.25	0	0	0	0
0.252	0	0	0	0
0.253	0	0	0	0
0.254	0	0	0	0
0.255	0	0	0	0
0.256	0	0	0	0
0.257	0	0	0	0
0.259	0	0	0	0
0.26	0	0	0	0
0.261	0	0	0	0
0.262	0	0	0	0
0.263	0	0	0	0
0.264	0	0	0	0
0.266	0	0	0	0
0.267	0	0	0	0
0.268	0	0	0	0
0.269	0	0	0	0
0.27	0	0	0	0
0.271	0	0	0	0
0.273	0	0	0	0
0.274	0	0	0	0
0.275	0	0	0	0
0.276	0	0	0	0
0.277	0	0	0	0
0.279	0	0	0	0
0.28	0	0	0	0
0.281	0	0	0	0
0.282	0	0	0	0
0.283	0	0	0	0
0.284	0	0	0	0
0.286	0	0	0	0
0.287	0	0	0	0
0.288	0	0	0	0
0.289	0	0	0	0
0.29	0	0	0	0
0.291	0	0	0	0
0.293	0	0	0	0
0.294	0	0	0	0
0.295	0	0	0	0
0.296	0	0	0	0
0.297	0	0	0	0
0.298	0	0	0	0
0.3	0	0	0	0
0.301	0	0	0	0
0.302	0	0	0	0
0.303	0	0	0	0
0.304	0	0	0	0
0.305	0	0	0	0
0.307	0	0	0	0
0.308	0	0	0	0
0.309	0	0	0	0
0.31	0	0	0	0
0.311	0	0	0	0
0.312	0	0	0	0
0.314	0	0	0	0
0.315	0	0	0	0
0.316	0	0	0	0
0.317	0	0	0	0
0.318	0	0	0	0
0.32	0	0	0	0
0.321	0	0	0	0
0.322	0	0	0	0
0.323	0	0	0	0
0.324	0	0	0	0
0.325	0	0	0	0
0.327	0	0	0	0
0.328	0	0	0	0
0.329	0	0	0	0
0.33	0	0	0	0
0.331	0	0	0	0
0.332	0	0	0	0
0.334	0	0	0	0
0.335	0	0	0	0
0.336	0	0	0	0
0.337	0	0	0	0
0.338	0	0	0	0
0.339	0	0	0	0
0.341	0	0	0	0
0.342	0	0	0	0
0.343	0	0	0	0
0.344	0	0	0	0
0.345	0	0	0	0
0.346	0	0	0	0
0.348	0	0	0	0
0.349	0	0	0	0
