# Supplementary material for: Exploring the role of macromolecular crowding and TNFR1 in cell volume control
Source: eLife journal article supplement (doi:10.7554/elife.92719), 2024-09-19
Supplement: fig2-data1 [file Fig2E.xlsx]

## Sheet: Sheet1
	NIH/ 3T3	HeLa	MDA- MB-231	RAW 264.7
n=	152	132	115	105
	0.16863	0.1799	0.18944	0.20864
	0.17697	0.17289	0.19718	0.20366
	0.18417	0.18861	0.15226	0.20292
	0.17051	0.1623	0.17831	0.20454
	0.16354	0.19123	0.19041	0.18649
	0.1797	0.18736	0.10129	0.19612
	0.16797	0.20278	0.11366	0.20415
	0.17308	0.21075	0.11074	0.21172
	0.16435	0.1968	0.18359	0.19185
	0.1691	0.19157	0.12542	0.19037
	0.17536	0.19778	0.14479	0.21414
	0.16158	0.21993	0.1879	0.21345
	0.1847	0.20893	0.17953	0.21315
	0.17738	0.18323	0.18526	0.16132
	0.17496	0.18176	0.18172	0.16319
	0.17138	0.18938	0.18692	0.19752
	0.18474	0.19131	0.11543	0.18766
	0.16898	0.18659	0.14611	0.18985
	0.17719	0.17633	0.13075	0.12857
	0.18094	0.17498	0.15535	0.18414
	0.17307	0.17736	0.15288	0.20445
	0.17248	0.18825	0.11553	0.19827
	0.17389	0.18832	0.1058	0.19613
	0.18578	0.17661	0.13881	0.19536
	0.17505	0.18911	0.16118	0.19336
	0.18575	0.19306	0.09893	0.18954
	0.17556	0.17622	0.09044	0.17336
	0.18846	0.16072	0.13645	0.17327
	0.18486	0.16497	0.17945	0.18435
	0.17168	0.16451	0.18564	0.17616
	0.18264	0.18889	0.16681	0.17585
	0.1842	0.19282	0.16837	0.16309
	0.17528	0.1837	0.17811	0.16564
	0.14803	0.18532	0.18785	0.17029
	0.18511	0.18879	0.19559	0.1584
	0.17546	0.18184	0.18965	0.19918
	0.19333	0.17912	0.18844	0.18908
	0.18079	0.18908	0.17602	0.1818
	0.18278	0.18444	0.17698	0.19625
	0.17761	0.16163	0.16627	0.17117
	0.18576	0.1727	0.15752	0.18495
	0.17028	0.17197	0.19522	0.18199
	0.13765	0.18857	0.18405	0.18783
	0.18076	0.17451	0.18291	0.19831
	0.18502	0.1822	0.17656	0.18619
	0.18176	0.16795	0.18072	0.16537
	0.17531	0.15929	0.17729	0.18489
	0.18334	0.18336	0.16633	0.17594
	0.17431	0.16941	0.1831	0.179
	0.17489	0.17366	0.14968	0.16233
	0.16892	0.1788	0.11299	0.15829
	0.17836	0.19048	0.1159	0.10187
	0.18297	0.16581	0.13457	0.12985
	0.17962	0.16293	0.12654	0.17413
	0.18389	0.16178	0.1322	0.18324
	0.18335	0.16979	0.09456	0.18566
	0.17555	0.17212	0.17136	0.1858
	0.17409	0.16746	0.17368	0.15915
	0.17364	0.1692	0.16682	0.18091
	0.18002	0.15803	0.16169	0.17471
	0.19153	0.15882	0.09895	0.1997
	0.17653	0.1898	0.10775	0.18918
	0.18193	0.18652	0.12064	0.18148
	0.18065	0.15852	0.10889	0.18125
	0.16354	0.18203	0.12646	0.18133
	0.16151	0.18227	0.13068	0.18121
	0.12707	0.14094	0.18632	0.11706
	0.18512	0.13588	0.15586	0.11447
	0.18862	0.19685	0.19722	0.14071
	0.15982	0.15016	0.17047	0.19762
	0.18168	0.18467	0.16958	0.20275
	0.16274	0.11106	0.18571	0.16965
	0.18263	0.14354	0.18701	0.1684
	0.15081	0.17778	0.15505	0.18317
	0.16573	0.19005	0.13831	0.17812
	0.16268	0.18933	0.09172	0.18423
	0.15523	0.17527	0.09009	0.18265
	0.18156	0.09889	0.1663	0.17439
	0.18317	0.1545	0.16837	0.17147
	0.18261	0.176	0.08411	0.17204
	0.15713	0.11336	0.16107	0.15407
	0.17983	0.18302	0.19358	0.16996
	0.16877	0.18987	0.19831	0.16966
	0.18447	0.17603	0.19303	0.18125
	0.17687	0.17629	0.18727	0.19318
	0.1813	0.17571	0.18266	0.19883
	0.18013	0.17401	0.18845	0.1949
	0.1314	0.14547	0.18833	0.17005
	0.18098	0.15433	0.1877	0.19788
	0.1699	0.15909	0.17372	0.21184
	0.15996	0.11256	0.17494	0.17923
	0.17947	0.10388	0.1827	0.18145
	0.13984	0.15792	0.18063	0.16764
	0.16811	0.17423	0.1909	0.15881
	0.18716	0.10268	0.1892	0.17877
	0.16794	0.17082	0.13384	0.1563
	0.17936	0.19721	0.10693	0.1854
	0.15986	0.15217	0.18533	0.18456
	0.16463	0.15506	0.18561	0.20532
	0.17882	0.14156	0.10099	0.20519
	0.17625	0.18259	0.11103	0.20464
	0.14105	0.14639	0.11201	0.19926
	0.14294	0.15764	0.18152	0.19406
	0.1808	0.1053	0.181	0.15553
	0.1681	0.16984	0.17163	0.14069
	0.16632	0.16342	0.18955
	0.17046	0.16889	0.18114
	0.1704	0.14679	0.15201
	0.17127	0.14765	0.17723
	0.1607	0.16736	0.13073
	0.17443	0.1287	0.19092
	0.16972	0.12781	0.14655
	0.18356	0.12306	0.20582
	0.18904	0.15044	0.20414
	0.18889	0.18501	0.19471
	0.15839	0.15725
	0.14971	0.17641
	0.16769	0.1538
	0.17625	0.14104
	0.16416	0.0846
	0.14394	0.13052
	0.16045	0.18128
	0.17143	0.11496
	0.16221	0.09559
	0.12142	0.1339
	0.17108	0.12637
	0.17626	0.16886
	0.17361	0.14254
	0.17169	0.13605
	0.15609	0.11614
	0.18373	0.18058
	0.18838	0.17881
	0.18958
	0.18834
	0.18021
	0.19274
	0.19044
	0.18718
	0.1897
	0.17428
	0.18151
	0.18817
	0.15973
	0.15625
	0.15549
	0.1808
	0.18461
	0.18482
	0.17832
	0.18278
	0.17224
	0.13928
