# Supplementary material for: Exploring the role of macromolecular crowding and TNFR1 in cell volume control
Source: eLife journal article supplement (doi:10.7554/elife.92719), 2024-09-19
Supplement: fig2-data1 [file FigS2A.xlsx]

## Sheet: Sheet1
(i)			(ii)
Mode	Mean		Modal values		Mean values
0.17505	0.16909		Isotonic	Hypertonic	Isotonic	Hypertonic
0.15836	0.15026		0.18006	0.202	0.18467	0.20415
0.17658	0.17367		0.1511	0.19941	0.15179	0.19935
0.16831	0.16067		0.16665	0.201	0.15106	0.2005
0.17827	0.17556		0.16018	0.20076	0.14354	0.20091
0.17341	0.16959		0.17235	0.20178	0.17768	0.20674
0.16082	0.16522		0.18003	0.19594	0.18983	0.19943
0.15936	0.16341		0.16353	0.19508	0.16889	0.18863
0.16155	0.15473		0.16566	0.20384	0.17355	0.20094
0.1612	0.15147		0.1564	0.20268	0.1545	0.19374
0.1759	0.1669		0.15877	0.20384	0.176	0.20323
0.15458	0.14839		0.15772	0.20522	0.16336	0.20809
0.1577	0.13948		0.18563	0.20219	0.18987	0.20159
0.17121	0.16889		0.17216	0.208	0.17603	0.20151
0.16884	0.16681		0.17597	0.20867	0.16922	0.21136
0.15293	0.14491		0.18172	0.20627	0.17571	0.20252
0.15083	0.15303		0.15611	0.20825	0.17401	0.21012
0.15154	0.14171
0.17427	0.1719
0.16682	0.15872
0.16153	0.15751
0.17082	0.16912
0.16805	0.16501
0.16322	0.15747
0.1575	0.1624
0.17533	0.17509
0.17003	0.16986
0.16879	0.16021
0.16192	0.15978
0.17411	0.16778
0.17107	0.16834
0.17381	0.17065
0.16655	0.15865
0.16928	0.16293
0.17824	0.17542
0.1676	0.16362
0.17478	0.17152
0.14814	0.14055
0.16922	0.16979
0.16932	0.16116
0.16988	0.1619
0.1483	0.14259
0.17221	0.16789
0.16524	0.16077
0.16178	0.15768
0.16994	0.16047
0.16963	0.16756
0.16282	0.1609
0.16767	0.16902
0.17305	0.16478
0.16887	0.16162
0.15617	0.15385
0.16657	0.16437
0.16853	0.16681
0.17362	0.17167
0.17259	0.16776
0.17387	0.16997
0.15275	0.14369
0.1711	0.16764
0.16136	0.13448
0.1534	0.14541
0.1768	0.17179
0.16855	0.16431
0.159	0.15292
0.16702	0.16083
0.15149	0.14257
0.17537	0.16693
0.16644	0.16084
0.17308	0.1669
0.15933	0.15452
0.16384	0.1563
0.17387	0.16989
0.17611	0.17049
0.15932	0.14933
0.17491	0.17697
0.17055	0.16079
0.16615	0.16626
0.16554	0.1671
0.15862	0.15169
0.17428	0.17125
0.17331	0.17495
0.1652	0.1642
0.17796	0.17317
0.16524	0.15993
0.17542	0.16958
0.16775	0.16218
0.16693	0.1655
0.16272	0.17273
0.16235	0.16714
0.1751	0.17027
0.16668	0.15874
0.18043	0.17847
0.17509	0.16628
0.16887	0.16063
0.16743	0.15941
0.16734	0.16654
0.17228	0.1685
0.17057	0.16919
0.17402	0.16865
0.16179	0.16209
0.17198	0.17028
0.16491	0.15741
0.1559	0.14388
0.17452	0.16829
0.16416	0.15712
0.16726	0.15875
0.164	0.1626
0.17189	0.16861
0.17392	0.16453
0.16878	0.16048
0.15692	0.14985
0.1715	0.16691
0.16566	0.15849
0.17341	0.16418
0.17281	0.17741
0.16326	0.1674
0.17684	0.17312
0.17257	0.16649
0.1677	0.17109
0.16074	0.15506
0.16601	0.16388
0.17645	0.17306
0.1676	0.16494
0.16422	0.15708
0.17707	0.17073
0.16943	0.15912
0.16091	0.15201
0.18079	0.1746
0.16917	0.16375
0.17742	0.17121
0.16266	0.16113
0.16591	0.16207
0.15923	0.15116
0.1742	0.16848
0.17995	0.17305
0.16718	0.16148
0.16854	0.16232
0.16531	0.15469
0.17315	0.16958
0.1688	0.16426
0.16507	0.15856
0.15249	0.14694
0.16135	0.15521
0.15889	0.15492
0.15342	0.14965
0.1748	0.17004
0.17343	0.16701
0.16832	0.16392
0.17721	0.16963
0.16639	0.16012
0.16557	0.15821
0.16795	0.15898
0.17547	0.17715
0.17998	0.17345
0.15966	0.1603
0.16996	0.1701
0.16998	0.15834
0.14004	0.13324
0.17063	0.17228
0.15365	0.15076
0.17339	0.16915
0.16019	0.16654
0.16428	0.15148
0.15652	0.14113
0.17059	0.16592
0.16746	0.16054
0.17161	0.1646
0.16493	0.16299
0.15305	0.15172
0.17315	0.16829
0.17721	0.17287
0.17365	0.16904
0.17019	0.1643
0.16939	0.16617
0.16025	0.15775
0.15735	0.14566
0.14907	0.1505
0.16728	0.1623
0.17498	0.17503
0.17248	0.1703
0.17895	0.17253
0.17168	0.16584
0.15486	0.15511
0.16005	0.16268
0.13872	0.13295
0.17032	0.17025
0.17162	0.1657
0.16281	0.16684
0.16841	0.15801
0.17005	0.16308
0.16985	0.16436
0.17319	0.16488
0.15685	0.1539
0.16348	0.16158
0.16926	0.16415
0.1653	0.15767
0.16912	0.17344
0.17199	0.16816
0.16972	0.16643
0.16355	0.16508
0.15344	0.13972
0.14888	0.14361
0.16517	0.16195
0.1664	0.16213
0.17717	0.17789
0.17002	0.16674
0.17293	0.16856
0.16933	0.16522
0.17002	0.17127
0.17336	0.16663
0.16332	0.1544
0.17194	0.16505
0.17309	0.16851
0.14829	0.14799
0.15525	0.16519
0.16387	0.16287
0.17145	0.16534
0.16814	0.16887
0.14851	0.14531
0.16809	0.16222
0.17405	0.16789
0.15639	0.16441
0.17118	0.16815
0.17213	0.17081
0.15353	0.15328
0.15424	0.14978
0.1658	0.16185
0.16922	0.16228
0.17956	0.17561
0.16822	0.16421
0.17262	0.16782
0.15488	0.15031
0.16949	0.16558
0.17694	0.17177
0.15939	0.15493
0.17543	0.17032
0.16453	0.16796
0.15898	0.15622
0.17218	0.16902
0.16039	0.15361
