# Supplementary material for: Exploring the role of macromolecular crowding and TNFR1 in cell volume control
Source: eLife journal article supplement (doi:10.7554/elife.92719), 2024-09-19
Supplement: fig2-data1 [file FigS2C.xlsx]

## Sheet: Sheet1
Anisotropy	Anisotropy	Anisotropy	Anisotropy	Total Intensity	Total Intensity	Total Intensity	Total Intensity
EGFP	EGFP	2GFP	2GFP	EGFP	EGFP	2GFP	2GFP
pre-bleach	post-bleach	pre-bleach	post-bleach	pre-bleach	post-bleach	pre-bleach	post-bleach
0.16668	0.16749	0.123	0.125	16275.1	9882.95	11801.4	7515.29
0.15363	0.1537	0.134	0.158	9857.03	9747.15	18907.3	9228.94
0.16938	0.1724	0.139	0.15	17571.1	6224.64	34243.2	27835.6
0.16762	0.15979	0.123	0.125	12769.5	12919.5	10633.5	6345.47
0.16503	0.16806	0.146	0.161	14984.1	10558.1	29688.7	22853.7
0.16945	0.1584	0.129	0.137	12636	9957.03	13581.1	8500.78
0.16879	0.15781	0.142	0.144	16662.5	8474.69	17379.1	12528
0.16988	0.16183	0.128	0.147	19540.4	7094.05	17697.6	12888.9
0.14985	0.15727	0.14	0.146	11703.9	6618.27	16746.9	11676.1
0.17531	0.15461	0.137	0.147	19943.6	12693.4	37477.1	32383.7
0.1669	0.15902	0.128	0.157	11526.5	12825.8	22017.2	21109.7
0.16	0.15004	0.141	0.142	11781.2	10359.3	16270	10734
0.16731	0.15707	0.14	0.149	15017.3	7286	21391.3	15290.9
0.15192	0.1676	0.142	0.15	13391.4	12386.3	20194.4	13333.8
0.15177	0.16576	0.148	0.152	13132.5	7637.22	18492.6	13487.3
0.16455	0.16546	0.128	0.152	17100	12396.2	18548.2	12808.9
0.15397	0.16995	0.135	0.149	11271.6	7820.23	21350.6	15312.9
0.17361	0.17426	0.124	0.135	17002.1	10715.5	13658.2	7390
0.16224	0.15103	0.132	0.141	13374.2	13653.8	15041.3	10278.9
0.16747	0.17215	0.143	0.147	16156.5	12653.4	45384.6	40948.3
0.17942	0.17699	0.145	0.144	24372.3	12629.9	52649.5	46798
0.15589	0.16802	0.121	0.134	12909.1	13281.3	13026.5	6809.41
0.16321	0.1587	0.153	0.163	17745.2	7572.6	18677.5	11315.6
0.16638	0.17037	0.13	0.145	17540	11937.9	14312.5	10565.8
0.16441	0.15813	0.15	0.16	18915	12513.6	16497	9991.36
0.17085	0.15776	0.134	0.137	16161.4	8425.25	13553.7	9061.53
0.1701	0.16496	0.14	0.156	16053	7762.82	23715	16192.7
0.17289	0.17577	0.137	0.143	16776.4	9601.44	15070.2	11110.5
0.1527	0.15282	0.125	0.141	17386.4	11605.8	14792	10582.9
0.16339	0.16649	0.145	0.154	14983.4	10127.6	17315.8	12268.5
0.16574	0.16283	0.133	0.134	14495.5	9504.81	13179.2	8309.57
0.16933	0.15466	0.143	0.157	15002.7	9341.04	15529.3	11020.1
0.16507	0.15771	0.142	0.152	20777.5	14250.3	15851.7	10423.9
0.16892	0.16451	0.114	0.14	19068.5	11790.1	15507.7	10385
0.1728	0.16494	0.111	0.126	17841.2	10130.5	13192.7	8748.91
0.17268	0.17556	0.128	0.133	17847.4	8957.41	18013	13252.4
0.16186	0.16453	0.128	0.139	18213.4	8655.48	13378.3	8601.77
0.16691	0.1596	0.129	0.134	14365.5	13824.7	17308.8	10872.9
0.17097	0.17031	0.132	0.135	18427.9	14880.2	19112.4	13204.3
0.17338	0.1764	0.118	0.143	15664.9	15241	18380.2	16578.3
0.17248	0.1713	0.138	0.153	18301.1	13831.7	25204.8	18804.6
0.16245	0.16795	0.139	0.144	16732.1	12248.3	36136.4	34743.3
0.16956	0.16453	0.138	0.141	13816.1	13972.4	39863.7	33414.1
0.16717	0.16523	0.125	0.15	17252.1	15148.8	29018.3	24189.9
0.16808	0.17296	0.146	0.153	18932.2	12271.9	23691.2	17881.6
0.17386	0.17618	0.132	0.143	17355.9	11846.8	12302.7	7920.4
0.1583	0.17133	0.133	0.15	13910.4	9785.32	20349.7	14581.2
0.1647	0.17222	0.146	0.152	17334.3	11502.2	27148.3	19973.4
0.14835	0.15804	0.142	0.151	14309.9	10138.3	20601.3	17082.4
0.16675	0.17319	0.128	0.136	15990.6	13659.9	16038.4	10052.3
0.16996	0.15806	0.126	0.147	15499.6	16119.5	26177.8	21081.1
0.17462	0.17877	0.122	0.127	18208.1	12845.6	13001.4	7999.01
0.17066	0.17208	0.131	0.138	17657.4	15504.9	16607	10501
0.17154	0.17497	0.14	0.154	17840.1	15139.3	38531.8	31991.6
0.16677	0.16415	0.125	0.13	14978.1	13203.3	14009.4	8652.72
0.16925	0.16916	0.134	0.148	18168.1	10514.8	16300.9	11807.4
0.15708	0.16307	0.12	0.127	16554.8	10910	12659.6	7017.98
0.17582	0.17771	0.123	0.137	19449	14732	15616.8	9772.86
0.17221	0.17174	0.143	0.152	18716.5	10742.4	23990.6	17208.7
0.17452	0.17086	0.137	0.145	14846.7	13057	28573.7	23808.5
0.15646	0.16266	0.138	0.146	16473.2	16115.2	25681.5	19460.3
0.15351	0.15237	0.132	0.137	16216.8	11527.7	16869.2	11557.1
0.16428	0.16793	0.132	0.138	13230.8	10540.5	20845.5	14653.7
0.16871	0.17071	0.115	0.127	19821	16933.6	13104	8305.75
0.17337	0.1787	0.134	0.142	19713.5	12403.8	17329.6	11902.3
0.16784	0.16118	0.128	0.137	16342.4	12676.2	21339.7	15439.6
0.16069	0.16481	0.103	0.129	17310	15267.7	12377.1	8519.49
0.17513	0.16855	0.131	0.131	23151	11968	14986.5	9556.93
0.17381	0.17607	0.121	0.129	20391.9	13485.3	12126.1	6913.99
0.15986	0.17098	0.11	0.116	15804.3	13461.2	11310.8	6295.18
0.16416	0.16427	0.119	0.123	17562.8	12336.5	12123.2	7030.39
0.17	0.16457			16525.1	11653.9
0.17327	0.16882			21667	12214
0.17762	0.17358			16643.8	11238.6
0.1548	0.15869			15120.7	12142.2
0.15468	0.15678			16796.5	16353.1
0.15614	0.15711			17789.7	14463.9
0.1695	0.15857			17478.3	11677.3
0.16914	0.17174			20335	11345.5
0.15373	0.15045			17287.7	15423.3
0.16956	0.17698			18578.4	18119.2
0.16229	0.17443			15362.1	13584.8
0.16792	0.17604			18195.4	15470.7
0.16498	0.17275			17179.3	15783.1
0.16312	0.17576			16049.8	12240.6
0.1696	0.1585			17972.8	18042.2
0.1614	0.1699			17165.4	11954.8
0.16113	0.15838			19201.5	18253.1
0.1684	0.17296			21085.6	16206.6
0.17668	0.15696			20074.8	12808.7
0.17452	0.1761			19997	18997.9
0.16319	0.16104			18428.3	15301.8
0.16727	0.1759			18142.5	17457.4
0.17783	0.18136			22052.1	13061.2
0.16864	0.16087			30917.9	14000.7
0.16974	0.1671			19894.9	15506.4
0.16744	0.17193			21996	14324.8
0.17177	0.16509			19278.6	17581.3
0.17777	0.17853			22154.4	15514.1
0.18001	0.18096			27037.8	17013.7
0.16352	0.17375			18392.8	17223.9
0.17192	0.1669			19360.1	17364.2
0.17454	0.16308			22718.3	19155.7
0.1703	0.17338			20628.1	16920.6
0.15746	0.16349			18288.8	17816.8
0.17045	0.16727			24994.7	16164.9
0.17344	0.17591			21725.8	18728.2
0.17514	0.16801			20326	14137.9
0.17067	0.17038			26272.7	15530.7
0.17354	0.16918			19633.2	14433.2
0.16853	0.16682			17312.2	13446.9
0.17396	0.16936			18939.2	15614.6
0.16874	0.16315			20147.9	13523.9
0.1679	0.16495			23158.6	20440.6
0.15562	0.15671			21278.6	17416.2
0.16542	0.16904			19999.7	13731.8
0.16586	0.16056			19866.6	15644.2
0.16563	0.17081			20608.6	14481.2
0.15392	0.15735			22857.3	18151.1
0.17394	0.17036			22155.3	19532.1
0.17517	0.17647			33542.3	18611.6
0.15844	0.15211			21366.3	18495.8
0.17316	0.17091			20794.9	21316.4
0.16948	0.17208			21272.5	15673.1
0.15531	0.1539			22063.1	17583.6
0.16245	0.17488			21564.1	21699.1
0.17484	0.17195			23893.6	19912.6
0.18094	0.18152			27016.3	16544.9
0.1636	0.15855			23467.8	21880.2
0.1729	0.1655			27252.4	18726.6
0.16043	0.16263			23336.6	19113
0.1662	0.16681			23341.9	21508.8
0.16818	0.17795			20556.9	18578
0.1777	0.17352			25586.1	22632
0.17644	0.17273			23226.6	19718.6
0.17745	0.17509			30681.9	17837.3
0.16862	0.17247			28537.6	19635.9
0.17546	0.18032			34558.1	17287.6
0.16696	0.16887			24523.3	20500.6
0.17473	0.17525			24304.7	18021
0.16298	0.16536			25400.5	21392.8
0.17539	0.17455			26223.6	19342.6
0.16529	0.16481			24343.8	22040.2
0.17742	0.17903			30935.9	20740.9
0.17212	0.17531			32568.4	22795.5
0.17492	0.16726			28654.4	22720.2
0.17282	0.16841			25818.1	25816.2
0.17843	0.17518			23943.6	22966.4
0.16054	0.15785			28528.9	23728.4
0.17595	0.17095			38779.1	22517
0.16089	0.16126			27704.5	26141.8
0.17312	0.1733			32190.6	23594.9
0.16795	0.17609			24412.9	21210.7
0.17041	0.17022			27918.7	23084.1
0.15961	0.16442			30740.8	27245.9
0.16863	0.17469			30508	27244.7
0.17323	0.17406			36032.4	29343.5
0.17767	0.17143			31576.5	25039.1
0.16936	0.16484			45172.9	28085.2
0.16927	0.17887			26489.4	29081.4
0.17454	0.16101			40034.5	32272.7
0.17258	0.1765			35531	31863.1
0.16669	0.1673			43346	30677.2
0.17137	0.16297			43862.1	31019.8
0.17537	0.17812			29531.9	34395.5
0.17503	0.18116			38458.7	35711.5
0.17298	0.17264			46655.4	35010
