# Supplementary material for: Exploring the role of macromolecular crowding and TNFR1 in cell volume control
Source: eLife journal article supplement (doi:10.7554/elife.92719), 2024-09-19
Supplement: fig2-data1 [file FigS2D.xlsx]

## Sheet: Sheet1
Lag Time	Correlation	Fit	Residual		Total Intensity	[EGFP]
τ in s	G(τ)					μM
			NIH/3T3-EGFP
1e-06	1.0136	1.01026	0.00335		9857.03	3.42644
1.2e-06	1.01855	1.01025	0.00831		11271.6	3.91816
1.4e-06	1.01108	1.01024	0.00084007		11526.5	4.00676
1.6e-06	1.0169	1.01023	0.00667		11703.9	4.06845
1.8e-06	1.01224	1.01022	0.00202		11781.2	4.09532
2e-06	0.99468	1.01022	-0.01554		12636	4.39247
2.2e-06	1.00807	1.01021	-0.00214		12769.5	4.43885
2.4e-06	1.00885	1.0102	-0.00135		12909.1	4.4874
2.6e-06	1.01875	1.01019	0.00856		13132.5	4.56503
2.8e-06	1.0103	1.01018	0.00011925		13230.8	4.59921
3e-06	1.01875	1.01018	0.00857		13374.2	4.64905
3.2e-06	1.02059	1.01017	0.01042		13391.4	4.65504
3.6e-06	1.01404	1.01015	0.00389		13816.1	4.80266
4e-06	0.99429	1.01014	-0.01585		13910.4	4.83544
4.4e-06	1.00312	1.01012	-0.007		14309.9	4.97432
4.8e-06	1.017	1.01011	0.00689		14365.5	4.99365
5.2e-06	1.01161	1.01009	0.00152		14495.5	5.03884
5.6e-06	1.0168	1.01007	0.00673		14846.7	5.16094
6e-06	1.00574	1.01006	-0.00432		14978.1	5.20662
6.4e-06	1.00516	1.01004	-0.00489		14983.4	5.20843
7.2e-06	1.00807	1.01001	-0.00194		14984.1	5.20867
8e-06	1.01181	1.00998	0.00182		15002.7	5.21514
8.8e-06	1.01117	1.00995	0.00122		15017.3	5.22023
9.6e-06	1.00477	1.00992	-0.00515		15120.7	5.25619
1.04e-05	1.01809	1.00989	0.0082		15362.1	5.34008
1.12e-05	1.01598	1.00986	0.00612		15499.6	5.38788
1.2e-05	1.00429	1.00983	-0.00555		15664.9	5.44533
1.28e-05	1.00827	1.0098	-0.00154		15804.3	5.49379
1.44e-05	1.01033	1.00974	0.00058745		15990.6	5.55854
1.6e-05	1.00713	1.00969	-0.00256		16049.8	5.57913
1.76e-05	1.00957	1.00963	-6.207e-05		16053	5.58024
1.92e-05	1.00964	1.00957	6.717e-05		16156.5	5.61624
2.08e-05	1.01097	1.00952	0.00146		16161.4	5.61794
2.24e-05	1.0074	1.00946	-0.00207		16216.8	5.63719
2.4e-05	0.99996	1.00941	-0.00945		16275.1	5.65744
2.56e-05	1.00687	1.00935	-0.00248		16342.4	5.68085
2.88e-05	1.01062	1.00925	0.00137		16473.2	5.72633
3.2e-05	1.00469	1.00914	-0.00445		16525.1	5.74435
3.52e-05	1.00734	1.00904	-0.00171		16554.8	5.75468
3.84e-05	1.00867	1.00894	-0.00027248		16643.8	5.78563
4.16e-05	1.01116	1.00885	0.00231		16662.5	5.79214
4.48e-05	1.01027	1.00875	0.00152		16732.1	5.8163
4.8e-05	1.01065	1.00866	0.00199		16776.4	5.83173
5.12e-05	1.00821	1.00857	-0.00035257		16796.5	5.8387
5.76e-05	1.00813	1.00839	-0.00025702		17002.1	5.91016
6.4e-05	1.00659	1.00822	-0.00163		17100	5.9442
7.04e-05	1.00613	1.00805	-0.00193		17165.4	5.96695
7.68e-05	1.00601	1.0079	-0.00189		17179.3	5.97178
8.32e-05	1.00758	1.00774	-0.00015939		17252.1	5.99709
8.96e-05	1.00757	1.0076	-3.13e-05		17287.7	6.00946
9.6e-05	1.00704	1.00746	-0.00041481		17310	6.01719
0.0001024	1.00593	1.00732	-0.00139		17312.2	6.01798
0.0001152	1.00816	1.00706	0.0011		17334.3	6.02566
0.000128	1.0054	1.00682	-0.00142		17355.9	6.03314
0.0001408	1.00596	1.00659	-0.00063712		17386.4	6.04376
0.0001536	1.00608	1.00638	-0.00030196		17478.3	6.0757
0.0001664	1.00642	1.00618	0.00023254		17540	6.09716
0.0001792	1.00392	1.006	-0.00208		17562.8	6.10507
0.000192	1.00562	1.00582	-0.00020288		17571.1	6.10796
0.0002048	1.00598	1.00565	0.00033327		17657.4	6.13796
0.0002304	1.00561	1.00534	0.00026882		17745.2	6.16848
0.000256	1.00614	1.00506	0.00108		17789.7	6.18394
0.0002816	1.00581	1.00481	0.00099456		17840.1	6.20146
0.0003072	1.00416	1.00458	-0.00042073		17841.2	6.20185
0.0003328	1.00317	1.00437	-0.0012		17847.4	6.20402
0.0003584	1.00459	1.00418	0.00040386		17972.8	6.24761
0.000384	1.00584	1.004	0.00183		18142.5	6.30659
0.0004096	1.00232	1.00384	-0.00152		18168.1	6.3155
0.0004608	1.0039	1.00355	0.00035479		18195.4	6.32496
0.000512	1.00375	1.0033	0.00044791		18208.1	6.3294
0.0005632	1.00451	1.00308	0.00144		18213.4	6.33122
0.0006144	1.00345	1.00288	0.00056917		18288.8	6.35746
0.0006656	1.00422	1.00271	0.00151		18301.1	6.36173
0.0007168	1.00323	1.00255	0.00067267		18392.8	6.3936
0.000768	1.00256	1.00241	0.00014416		18427.9	6.40579
0.0008192	1.00233	1.00229	3.892e-05		18428.3	6.40592
0.0009216	1.00291	1.00207	0.00083947		18578.4	6.45813
0.00102	1.00207	1.00189	0.00018775		18716.5	6.50613
0.00113	1.00316	1.00173	0.00143		18915	6.57512
0.00123	1.00242	1.0016	0.00082838		18932.2	6.58111
0.00133	1.00226	1.00148	0.00077691		18939.2	6.58355
0.00143	1.00175	1.00138	0.0003704		19068.5	6.62847
0.00154	1.0023	1.00129	0.00101		19201.5	6.6747
0.00164	1.00246	1.00121	0.00125		19278.6	6.70151
0.00184	1.00186	1.00107	0.00078657		19360.1	6.72986
0.00205	1.0017	1.00096	0.00073645		19449	6.76073
0.00225	1.00149	1.00087	0.00061849		19540.4	6.79252
0.00246	1.00155	1.00079	0.00075921		19633.2	6.82479
0.00266	1.00136	1.00072	0.00063989		19713.5	6.85269
0.00287	1.0009	1.00067	0.00023029		19821	6.89007
0.00307	1.00141	1.00062	0.00079276		19866.6	6.90591
0.00328	1.00134	1.00057	0.00077009		19894.9	6.91576
0.00369	1.00091	1.0005	0.00041371		19943.6	6.93269
0.0041	1.00029	1.00044	-0.00015059		19997	6.95123
0.00451	1.00059	1.00039	0.00019955		19999.7	6.95217
0.00492	1.00086	1.00035	0.00050469		20074.8	6.9783
0.00532	1.00051	1.00032	0.00018785		20147.9	7.00368
0.00573	1.00029	1.00029	-4e-08		20326	7.06561
0.00614	1.00069	1.00027	0.00041903		20335	7.06874
0.00655	1.00034	1.00025	9.473e-05		20391.9	7.08853
0.00737	1.00057	1.00021	0.00036085		20556.9	7.14589
0.00819	1.00038	1.00019	0.00019741		20608.6	7.16383
0.00901	0.99994	1.00016	-0.00022637		20628.1	7.17062
0.00983	1.00018	1.00015	3.414e-05		20777.5	7.22257
0.01065	1.00007	1.00013	-6.329e-05		20794.9	7.2286
0.01147	0.99968	1.00012	-0.00043917		21085.6	7.32967
0.01229	0.99978	1.00011	-0.00032757		21272.5	7.39463
0.01311	1.00024	1.0001	0.00014432		21278.6	7.39676
0.01475	1.00007	1.00008	-1.536e-05		21366.3	7.42724
0.01638	1.00061	1.00007	0.00053225		21564.1	7.49598
0.01802	1.00053	1.00006	0.00046223		21667	7.53175
0.01966	1.00065	1.00006	0.00059155		21725.8	7.55218
0.0213	1.00034	1.00005	0.00029342		21996	7.64614
0.02294	1.00017	1.00005	0.00012503		22052.1	7.66563
0.02458	1.0003	1.00004	0.00025816		22063.1	7.66944
0.02621	0.99997	1.00004	-7.243e-05		22154.4	7.70119
0.02949	0.9996	1.00003	-0.0004342		22155.3	7.70148
0.03277	0.99984	1.00003	-0.00019189		22718.3	7.89719
0.03604	1.00019	1.00002	0.0001626		22857.3	7.94551
0.03932	1.00017	1.00002	0.00014502		23151	8.04763
0.0426	1.00029	1.00002	0.00026669		23158.6	8.05027
0.04588	1.00047	1.00002	0.00045435		23226.6	8.07389
0.04915	1.00028	1.00002	0.00026201		23336.6	8.11212
0.05243	0.99978	1.00001	-0.00023413		23341.9	8.11396
0.05898	0.99975	1.00001	-0.00025722		23467.8	8.15773
0.06554	1.00002	1.00001	5.92e-06		23893.6	8.30577
0.07209	0.99971	1.00001	-0.00029492		23943.6	8.32313
0.07864	1.00023	1.00001	0.00021747		24304.7	8.44866
0.0852	1.0002	1.00001	0.00019479		24343.8	8.46224
0.09175	0.99989	1.00001	-0.000116		24372.3	8.47215
0.0983	1.00018	1.00001	0.00017696		24412.9	8.48626
0.10486	1.00006	1.00001	5.379e-05		24523.3	8.52465
0.11796	1.0002	1	0.00019467		24994.7	8.68852
0.13107	1.00017	1	0.00017126		25400.5	8.82956
0.14418	1.00002	1	1.342e-05		25586.1	8.89409
0.15729	1.00003	1	2.983e-05		25818.1	8.97474
0.17039	0.99993	1	-7.111e-05		26223.6	9.11571
0.1835	0.9998	1	-0.00019901		26272.7	9.13275
0.19661	0.9997	1	-0.00030233		26489.4	9.20808
0.20972	0.99998	1	-2.582e-05		27016.3	9.39125
0.23593	0.99986	1	-0.00014522		27037.8	9.39874
0.26214	0.99994	1	-5.85e-05		27252.4	9.47332
0.28836	0.99986	1	-0.00014317		27704.5	9.63048
0.31457	0.99976	1	-0.0002429		27918.7	9.70493
0.34079	0.99956	1	-0.00043703		28528.9	9.91706
0.367	0.99997	1	-3.242e-05		28537.6	9.92006
0.39322	1.00007	1	7.103e-05		28654.4	9.96066
0.41943	1.0002	1	0.00019864		29531.9	10.2657
					30508	10.605
					30681.9	10.6655
					30740.8	10.6859
					30917.9	10.7475
					30935.9	10.7538
					31576.5	10.9764
					32190.6	11.1899
					32568.4	11.3212
					33542.3	11.6598
					34558.1	12.0129
					35531	12.3511
					36032.4	12.5254
					38458.7	13.3688
					38779.1	13.4802
					40034.5	13.9166
					43346	15.0677
					43862.1	15.2471
					45172.9	15.7027
					46655.4	16.2181
					52286.5	18.1755
