# Supplementary material for: Exploring the role of macromolecular crowding and TNFR1 in cell volume control
Source: eLife journal article supplement (doi:10.7554/elife.92719), 2024-09-19
Supplement: fig3-data1 [file elife-92719-fig3-data1-v2.zip]

## Sheet: Sheet1
G	S	G	S	G	S
Autofluorescence	Autofluorescence	Lamellipodia	Lamellipodia	Cell Body	Cell Body
0.61948	0.41025	0.72171	0.3773	0.81725	0.35222
0.64763	0.34971	0.7625	0.35696	0.82459	0.35024
0.63459	0.3892	0.69494	0.32549	0.81279	0.35475
0.56534	0.36539	0.79724	0.34307	0.8155	0.35363
0.52495	0.34931	0.71737	0.36724	0.81975	0.35563
0.62174	0.35957	0.69447	0.35378	0.81553	0.3649
0.56064	0.36937	0.81158	0.35396	0.81903	0.35197
0.53822	0.41227	0.79522	0.32977	0.81928	0.35325
0.53298	0.37352	0.76644	0.35396	0.81211	0.36153
0.60695	0.32556	0.68703	0.35199	0.81933	0.35419
0.61225	0.36828	0.65302	0.39683	0.81317	0.35774
0.60037	0.34832	0.81149	0.33658	0.82377	0.34921
0.66736	0.32057	0.78796	0.33506	0.82084	0.34861
0.58818	0.42018	0.79518	0.35748	0.81383	0.36046
0.64279	0.34995	0.80157	0.36314	0.82461	0.34761
0.53106	0.42712	0.7546	0.3628	0.80803	0.36038
0.4146	0.37516	0.72795	0.33511	0.81801	0.35665
0.64671	0.36891	0.79971	0.34978	0.82042	0.35634
0.60668	0.37303	0.78997	0.35767	0.82401	0.34798
0.62032	0.37475	0.79589	0.35536	0.81914	0.36226
0.65727	0.35502	0.80725	0.35499	0.82722	0.35163
0.52898	0.30909	0.79377	0.36383	0.82102	0.35204
0.4789	0.32493	0.81581	0.34018	0.82992	0.34765
0.59268	0.41338	0.81611	0.34559	0.82742	0.34721
0.60195	0.37907	0.77208	0.36589	0.82338	0.35052
0.59783	0.36807	0.77833	0.34799	0.81853	0.35581
0.43998	0.37789	0.78706	0.35679	0.82767	0.35079
0.53234	0.37178	0.77213	0.33748	0.81359	0.35084
0.58565	0.32419	0.79902	0.34293	0.82244	0.35292
0.57785	0.346	0.78542	0.35644	0.81809	0.35433
0.60797	0.3524	0.79449	0.35655	0.81713	0.36229
0.63734	0.3376	0.80201	0.34467	0.81862	0.34991
0.6412	0.3796	0.81634	0.3478	0.82023	0.35322
0.58395	0.36316	0.7887	0.34065	0.82714	0.35157
0.6248	0.37693	0.81013	0.34329	0.82927	0.35438
0.66919	0.38021	0.8021	0.35445	0.82041	0.35325
0.6523	0.35078	0.80305	0.35812	0.82383	0.35537
0.72377	0.3536	0.78885	0.34945	0.81819	0.35462
0.65953	0.36651	0.79663	0.34929	0.82096	0.34992
0.66011	0.36068	0.78645	0.34639	0.82523	0.34884
0.6048	0.38557	0.79162	0.34878	0.82372	0.34985
0.66858	0.37807	0.80296	0.34345	0.82265	0.34828
0.62242	0.35189	0.79311	0.35064	0.82093	0.35544
0.66914	0.35909	0.79461	0.35952	0.82083	0.35479
0.58399	0.37609	0.80942	0.34755	0.82787	0.34614
0.62217	0.38724	0.80516	0.35471	0.82491	0.35084
0.60187	0.38977	0.8294	0.34654	0.81983	0.35596
0.61314	0.32951	0.80582	0.35729	0.82383	0.35049
0.56219	0.3806	0.77802	0.36503	0.82629	0.34762
0.61573	0.35995	0.77366	0.37146	0.81723	0.35326
0.55852	0.32464	0.77727	0.36131	0.82497	0.34434
0.54242	0.37176	0.75329	0.3525	0.8275	0.35032
0.62682	0.42239	0.79008	0.35779	0.81993	0.34658
0.63729	0.33289	0.77746	0.36379	0.81981	0.35177
0.5838	0.35722	0.78974	0.36034	0.82359	0.34948
0.5602	0.35468	0.8018	0.34962	0.82373	0.35054
0.56783	0.33583	0.79255	0.34735	0.82676	0.34923
0.64895	0.38495	0.7993	0.35436	0.82462	0.34616
0.64666	0.34268	0.80874	0.34338	0.82268	0.35039
0.60162	0.36593	0.80943	0.37184	0.8124	0.35603
0.64781	0.36636	0.79997	0.35548	0.82054	0.34917
0.5605	0.31808	0.81296	0.34271	0.8236	0.35965
0.56322	0.42134	0.80279	0.35205	0.81577	0.35419
0.59021	0.34214	0.80367	0.33896	0.82463	0.35136
0.60733	0.33096	0.78625	0.35588	0.81806	0.34796
0.61567	0.3267	0.76038	0.34719	0.81757	0.35457
0.58673	0.35407	0.78222	0.35911	0.82472	0.35622
0.49747	0.36849	0.78001	0.35493	0.8237	0.35236
0.51821	0.35233	0.79272	0.35141	0.82385	0.35455
0.53212	0.3516	0.79929	0.36414	0.81798	0.35398
0.51989	0.34062	0.78488	0.36903	0.81731	0.35546
0.5465	0.33314	0.79391	0.33598	0.81453	0.35829
0.54548	0.40113	0.80227	0.36531	0.8185	0.35139
0.5695	0.33937	0.7947	0.34043	0.81528	0.3506
0.57713	0.34749	0.80994	0.33071	0.81968	0.35435
0.59113	0.33908	0.81434	0.33624	0.82197	0.35218
0.44038	0.40494	0.80414	0.34445	0.81653	0.35328
0.52483	0.40581	0.80645	0.33794	0.82276	0.34961
0.47769	0.34559	0.80478	0.35394	0.82305	0.35288
0.60354	0.30597	0.80987	0.34763	0.8173	0.35047
0.50084	0.37462	0.78429	0.33212	0.82446	0.35645
0.52823	0.33041	0.80294	0.35768	0.8268	0.34857
0.47179	0.3555	0.78678	0.34513	0.82115	0.35176
0.67435	0.29493	0.78356	0.35239	0.8157	0.35762
0.57138	0.27251	0.79366	0.34853	0.81947	0.35261
0.60749	0.30606	0.7554	0.35042	0.82188	0.35509
0.51561	0.32841	0.78701	0.35848	0.8206	0.35189
0.59913	0.3375	0.78835	0.3465	0.82512	0.3515
0.53032	0.29616	0.79423	0.34224	0.81919	0.35413
0.55112	0.35844	0.79277	0.36221	0.82043	0.35354
0.47003	0.36282	0.79263	0.33619	0.82009	0.35562
0.51968	0.34431	0.78597	0.35518	0.82756	0.34827
0.44389	0.36713	0.7976	0.3475	0.82218	0.35186
0.57833	0.33019	0.78166	0.34088	0.83075	0.34144
0.51953	0.33398	0.80574	0.35205	0.82407	0.34885
0.50021	0.37891	0.82585	0.34592	0.82043	0.35041
0.55651	0.33411	0.79847	0.34614	0.82387	0.35007
0.47658	0.37581	0.7926	0.34048	0.82609	0.34752
0.47332	0.37027	0.77776	0.36144	0.81944	0.35009
0.5119	0.34719	0.7656	0.35666	0.81688	0.35694
0.56187	0.32496	0.78385	0.36623	0.81735	0.36009
0.57677	0.36249	0.79707	0.35215	0.82254	0.35452
0.53289	0.41815	0.79538	0.3594	0.8144	0.35506
0.54465	0.38033	0.79638	0.34825	0.81892	0.35547
0.54992	0.39246	0.79032	0.35804	0.82127	0.35442
0.5605	0.30497	0.78493	0.34778	0.8141	0.35535
0.55265	0.37406	0.7607	0.36059	0.82229	0.34929
0.59128	0.35202	0.76169	0.35729	0.82544	0.35635
0.57216	0.3538	0.80784	0.35219	0.81799	0.35641
0.55274	0.40089	0.77981	0.36274	0.81246	0.353
0.63169	0.3225	0.76534	0.36864	0.81741	0.35309
0.62079	0.35939	0.78727	0.34776	0.81868	0.35655
0.58087	0.31941	0.78148	0.33053	0.81879	0.35463
0.56934	0.40056	0.78677	0.36881	0.81787	0.35756
0.61657	0.38446	0.75884	0.37611	0.81844	0.35618
0.53808	0.32397	0.80962	0.36047	0.8163	0.34966
0.55029	0.4067	0.81895	0.34121	0.82249	0.34549
0.61768	0.40225	0.79707	0.34834	0.82199	0.351
0.6125	0.29682	0.79251	0.3516	0.81513	0.35833
0.48079	0.37535	0.77144	0.34004	0.81842	0.36234
0.57563	0.36006	0.75661	0.32844	0.82117	0.35146
0.59793	0.33696	0.77784	0.3479	0.82007	0.35007
0.60889	0.3747	0.79342	0.35757	0.81957	0.35349
0.56982	0.35367	0.79404	0.35578	0.8208	0.35357
0.65655	0.35583	0.78988	0.35653	0.81991	0.35426
0.62577	0.37036	0.79765	0.36086	0.8242	0.35463
0.61056	0.38107	0.77062	0.357	0.82472	0.35082
0.6044	0.36473	0.80291	0.34781	0.82854	0.35139
0.62808	0.38366	0.77509	0.35494	0.81667	0.35677
0.5239	0.37117	0.77465	0.33353	0.81574	0.35632
0.59669	0.37814	0.77849	0.36184	0.82586	0.34894
0.59623	0.39421	0.77053	0.35605	0.83156	0.34749
0.47226	0.33742	0.80319	0.35152	0.8244	0.35033
0.45225	0.38254	0.80516	0.34275	0.8277	0.34783
0.63306	0.3444	0.78806	0.35749	0.82557	0.34898
0.5684	0.41179	0.78801	0.34897	0.82161	0.36013
0.54554	0.41598	0.78764	0.32168	0.82522	0.35076
0.61635	0.36044	0.79073	0.34304	0.82341	0.35701
0.49572	0.32444	0.80728	0.355	0.81914	0.34964
0.5843	0.32976	0.78762	0.34987	0.81859	0.35111
0.57255	0.31063	0.80418	0.34403	0.81827	0.35952
0.60677	0.33349	0.75519	0.35305	0.82208	0.35403
0.47693	0.38527	0.78638	0.34361	0.82261	0.35321
0.69623	0.31367	0.78072	0.38972	0.82429	0.35388
0.53008	0.38961	0.79572	0.3514	0.82392	0.35339
0.52008	0.32213	0.79613	0.35104	0.81679	0.35815
0.53312	0.37798	0.78843	0.36372	0.8172	0.34817
0.45452	0.36347	0.81707	0.33454	0.81808	0.35339
0.51606	0.36487	0.77398	0.36115	0.82306	0.35226
0.50664	0.35781	0.77853	0.34368	0.81946	0.35146
0.55189	0.34365	0.78408	0.36302	0.81664	0.35177
0.54794	0.36101	0.79326	0.35525	0.81847	0.35912
0.64664	0.32997	0.76985	0.35818	0.8171	0.3552
0.57148	0.29952	0.78727	0.3414	0.8197	0.34316
0.51555	0.36583	0.75358	0.35496	0.82253	0.34845
0.52788	0.37078	0.78453	0.36727	0.82462	0.35017
0.61097	0.28927	0.77122	0.34966	0.8208	0.35827
0.61114	0.37788	0.78745	0.35853	0.81819	0.35182
0.54232	0.3741	0.78672	0.36041	0.81686	0.3519
0.60585	0.38804	0.77216	0.3579	0.82866	0.34962
0.56245	0.37847	0.769	0.35902	0.83079	0.3449
0.52966	0.40244	0.80028	0.35349	0.81682	0.35273
0.55968	0.40322	0.79905	0.34688	0.81741	0.35389
0.61119	0.39552	0.79963	0.3564	0.81189	0.35743
0.56744	0.41716	0.80809	0.35464	0.81738	0.35389
0.65308	0.34785	0.80009	0.35299	0.82345	0.34985
0.53014	0.347	0.78451	0.33492	0.82151	0.35528
0.60445	0.37042	0.79255	0.35076	0.82834	0.3494
0.5338	0.37617	0.78662	0.34308	0.81686	0.35806
0.5739	0.40446	0.80442	0.35514	0.82319	0.35163
0.60012	0.33862	0.77613	0.37028	0.82564	0.34293
0.66774	0.39736	0.8085	0.34423	0.82206	0.35046
0.50155	0.38591	0.77899	0.36569	0.81809	0.35753
0.58763	0.39583	0.79032	0.36519	0.82292	0.35307
0.57592	0.3797	0.76771	0.36116	0.83104	0.34781
0.68272	0.38863	0.75395	0.35096	0.81817	0.35736
0.61552	0.32609	0.74665	0.36065	0.8204	0.35295
0.62903	0.35267	0.78095	0.36214	0.82117	0.35461
0.63001	0.39548	0.76302	0.35601	0.81659	0.35183
0.65978	0.34796	0.76036	0.35301	0.81956	0.3587
0.6644	0.36313	0.77824	0.35093	0.82779	0.35494
0.63203	0.38291	0.7693	0.36345	0.82208	0.35515
0.56392	0.40167	0.7981	0.34636	0.82332	0.34977
0.63464	0.35097	0.77678	0.3352	0.82658	0.35367
0.59676	0.38953	0.8015	0.34545	0.81937	0.35261
0.6333	0.41001	0.80496	0.3469	0.82378	0.34913
0.67527	0.34437	0.78843	0.35645	0.81797	0.35502
0.63863	0.38478	0.79556	0.35239	0.81727	0.35151
0.60337	0.40885	0.78785	0.3511	0.8291	0.33905
0.60962	0.36784	0.79959	0.35809	0.82883	0.34753
0.63396	0.4073	0.78268	0.34157	0.82628	0.34925
0.66233	0.37684	0.79096	0.34822	0.82135	0.35456
0.69031	0.34442	0.78147	0.35466	0.822	0.35234
0.62002	0.38788	0.75576	0.36402	0.82263	0.36068
0.60615	0.40629	0.78574	0.34925	0.82534	0.35528
0.6682	0.34221	0.78163	0.35051	0.81963	0.35425
0.59645	0.39391	0.77658	0.36509	0.81267	0.35262
0.63531	0.39231	0.7901	0.3562	0.82331	0.3524
0.62984	0.36396	0.80164	0.34741	0.81253	0.36053
0.5706	0.37291	0.7771	0.35463	0.82694	0.34103
0.59204	0.40923	0.78888	0.3426	0.82335	0.35361
0.59781	0.35274	0.78739	0.35538	0.8234	0.34962
0.54628	0.34249	0.77174	0.35579	0.82167	0.34854
0.54489	0.35937	0.7929	0.35175	0.82641	0.3441
0.50092	0.38664	0.7855	0.3359	0.81891	0.35187
0.60837	0.36129	0.76316	0.35469	0.8224	0.34826
0.54034	0.41387	0.76539	0.34418	0.82348	0.34508
0.63369	0.35348	0.75859	0.34596	0.82375	0.34725
0.58882	0.38567	0.75298	0.35832	0.82614	0.35026
0.58798	0.42463	0.77933	0.3781	0.8148	0.35268
0.64899	0.33867	0.79176	0.34447	0.81736	0.34625
0.61362	0.37922	0.77444	0.34654	0.81373	0.35445
0.57538	0.39063	0.79537	0.34573	0.81807	0.35891
0.58509	0.42301	0.78592	0.35819	0.82416	0.34894
0.59058	0.40386	0.78752	0.34369	0.81782	0.35565
0.57071	0.42248	0.79652	0.3592	0.82095	0.35429
0.52946	0.37225	0.79018	0.34144	0.82174	0.35621
0.62288	0.41476	0.78805	0.36318	0.82075	0.35395
0.53792	0.40069	0.79412	0.35779	0.82261	0.3472
0.60192	0.37416	0.79065	0.35619	0.82169	0.34881
0.46902	0.40591	0.78593	0.34258	0.82682	0.34421
0.50296	0.36268	0.77968	0.34594	0.81699	0.35751
0.51141	0.36134	0.78494	0.35091	0.82963	0.34984
0.57329	0.36825	0.75513	0.36403	0.82904	0.34926
0.54774	0.39585	0.77447	0.35831	0.81789	0.35892
0.59203	0.34822	0.78076	0.36997	0.81225	0.35528
0.5821	0.39264	0.79935	0.34123	0.82592	0.3531
0.63359	0.38867	0.76945	0.3622	0.82098	0.35185
0.62353	0.35157	0.78675	0.34868	0.82791	0.35188
0.58602	0.33645	0.78196	0.37138	0.82412	0.35276
0.53592	0.43469	0.80339	0.34486	0.82397	0.35344
0.6318	0.34753	0.75976	0.36515	0.82788	0.35233
0.59871	0.32446	0.75634	0.36847	0.81887	0.35412
0.66197	0.36032	0.75664	0.35022	0.83145	0.34362
0.64498	0.40085	0.79874	0.33976	0.82678	0.35103
0.62346	0.3265	0.77919	0.35989	0.8172	0.34579
0.65409	0.357	0.75857	0.372	0.82313	0.35345
0.63337	0.34819	0.78664	0.34544	0.82554	0.34887
0.63168	0.40364	0.78644	0.33107	0.82573	0.34669
0.63304	0.34699	0.77241	0.33858	0.82747	0.34768
0.68117	0.30048	0.75119	0.33665	0.81942	0.34939
0.63044	0.35862	0.77585	0.35433	0.8186	0.3589
0.56688	0.38152	0.80847	0.35819	0.82321	0.34901
0.54818	0.37163	0.77764	0.35543	0.81795	0.36067
0.59054	0.38009	0.77562	0.36523	0.8156	0.34919
0.66869	0.32675	0.79908	0.33871	0.82644	0.35145
0.56232	0.36011	0.80696	0.34668	0.82776	0.35082
0.5892	0.3737	0.79469	0.34255	0.82929	0.35308
0.58342	0.36625	0.80282	0.35698	0.82085	0.3553
0.60891	0.34171	0.79531	0.35446	0.81567	0.35116
0.66087	0.3448	0.78256	0.36952	0.82124	0.34717
0.54227	0.3417	0.79103	0.34527	0.80965	0.35605
0.55107	0.40617	0.79992	0.34842	0.81303	0.35333
0.57016	0.29188	0.79584	0.35829	0.81607	0.35377
0.6323	0.38214	0.7943	0.34842	0.81607	0.34913
0.57648	0.37187	0.76713	0.34245	0.81681	0.3556
0.61155	0.34915	0.77669	0.3564	0.82693	0.34485
0.60044	0.32761	0.77732	0.35123	0.82513	0.35267
0.62421	0.34052	0.78451	0.35706	0.82219	0.35282
0.59557	0.34113	0.78301	0.36001	0.81528	0.3578
0.67189	0.32277	0.7961	0.34485	0.82632	0.35191
0.5697	0.35124	0.76622	0.35501	0.8177	0.35158
0.52075	0.36132	0.77886	0.36038	0.81607	0.36047
0.5269	0.36841	0.79938	0.32137	0.81066	0.35811
0.47023	0.34569	0.77387	0.36559	0.8169	0.3546
0.53342	0.35438	0.79226	0.37161	0.82031	0.35693
0.59585	0.33348	0.77839	0.37305	0.82371	0.35166
0.52447	0.34636	0.78748	0.35465	0.8168	0.35517
0.56456	0.42231	0.78118	0.34591	0.8156	0.35827
0.52248	0.38735	0.80708	0.35076	0.82147	0.35059
0.53373	0.29587	0.77465	0.35262	0.82345	0.34796
0.60985	0.36961	0.78632	0.3499	0.81884	0.35548
0.5715	0.39453	0.80065	0.34834	0.819	0.36259
0.55305	0.34306	0.79894	0.3443	0.82232	0.36127
0.50337	0.34953	0.80647	0.34594	0.82238	0.34998
0.55964	0.30999	0.79985	0.35525	0.81982	0.35281
0.5415	0.32193	0.80307	0.33942	0.82487	0.35012
0.5016	0.41004	0.77728	0.35205	0.8203	0.34745
0.50682	0.35725	0.79724	0.34793	0.81555	0.35818
0.50333	0.3165	0.79111	0.34519	0.81798	0.36009
0.61108	0.42754	0.80265	0.33701	0.81929	0.35226
0.57965	0.33136	0.79913	0.35389	0.82392	0.35145
0.55143	0.42036	0.78699	0.36155	0.82484	0.35162
0.52772	0.33872	0.79954	0.34802	0.82464	0.35311
0.58127	0.33532	0.79044	0.35775	0.83195	0.35212
0.55131	0.37203	0.79095	0.35644	0.81949	0.34841
0.6225	0.37837	0.79466	0.3502	0.82779	0.34685
0.47193	0.2986	0.80239	0.35804	0.82657	0.34695
0.58895	0.34106	0.79594	0.36014	0.82649	0.35117
0.61733	0.34169	0.8094	0.34903	0.82644	0.3515
0.43144	0.37034	0.81211	0.35477	0.82194	0.3519
0.5305	0.36165	0.77574	0.35807	0.82841	0.34421
0.47246	0.40208	0.75251	0.36267	0.82578	0.35075
0.48954	0.41767	0.76138	0.35405	0.82304	0.35266
0.50044	0.40071	0.72541	0.3554	0.82395	0.35734
0.45036	0.34206	0.77178	0.3374	0.81722	0.35004
0.41408	0.38645	0.78021	0.36289	0.82286	0.3508
0.50268	0.35227	0.78149	0.36098	0.81448	0.35392
0.48358	0.37588	0.77277	0.36257	0.82408	0.35436
0.55971	0.30613	0.76967	0.36336	0.83152	0.35183
0.60162	0.3391	0.77415	0.33354	0.82563	0.35485
0.51338	0.27214	0.75285	0.35624	0.83236	0.34897
0.52866	0.30418	0.75999	0.35394	0.81347	0.35885
0.53495	0.37146	0.78382	0.35973	0.83096	0.34533
0.57802	0.35696	0.78654	0.35184	0.82095	0.35002
0.58887	0.40235	0.80357	0.36441	0.80993	0.36193
0.54148	0.36038	0.80459	0.34744	0.81081	0.35127
0.56824	0.33152	0.79452	0.36826	0.82044	0.35033
0.49745	0.41891	0.77459	0.35585	0.81607	0.35259
0.48872	0.33696	0.77806	0.34256	0.8247	0.34709
0.57884	0.35995	0.80073	0.34583	0.81509	0.35623
0.61978	0.32703	0.78747	0.36016	0.81959	0.3542
0.54801	0.30425	0.79198	0.36203	0.81991	0.35194
0.66634	0.31015	0.8034	0.33523	0.82014	0.35265
0.62198	0.33684	0.8093	0.35915	0.81935	0.35047
0.57545	0.40592	0.7916	0.34964	0.81339	0.35172
0.62681	0.36286	0.80077	0.3455	0.80951	0.35814
0.63087	0.30101	0.78163	0.36144	0.82232	0.35108
0.629	0.34956	0.80919	0.35685	0.82702	0.34726
0.55946	0.34558	0.81309	0.35383	0.81685	0.3508
0.57525	0.43013	0.79877	0.35589	0.81409	0.35814
0.55678	0.37204	0.79311	0.36497	0.82076	0.35129
0.55781	0.39137	0.79243	0.35026	0.80903	0.36173
0.54793	0.33374	0.80836	0.35028	0.81528	0.35764
0.56004	0.36523	0.80564	0.34143	0.81957	0.35497
0.59326	0.32635	0.80293	0.35072	0.82039	0.34642
0.51563	0.33815	0.7953	0.35281	0.82179	0.34676
0.56612	0.43014	0.79309	0.37001	0.81822	0.35696
0.60483	0.35455	0.7851	0.36212	0.82074	0.35262
0.54786	0.38559	0.7964	0.36076	0.82485	0.35202
0.57298	0.32853	0.79414	0.35328	0.81389	0.35452
0.60391	0.39434	0.80403	0.34766	0.81775	0.35173
0.52413	0.3945	0.80837	0.34933	0.8105	0.36195
0.502	0.4774	0.80097	0.35657	0.81892	0.35319
0.6361	0.26235	0.79619	0.35878	0.82342	0.35101
0.52944	0.40355	0.78352	0.34801	0.82198	0.3532
0.56485	0.34801	0.78175	0.35109	0.81659	0.35895
0.50474	0.39302	0.77546	0.33234	0.82323	0.35299
0.47622	0.29439	0.74363	0.34642	0.82366	0.34943
0.60483	0.35266	0.78204	0.34089	0.82644	0.34572
0.53199	0.42817	0.79895	0.34736	0.82755	0.34478
0.44975	0.34925	0.78442	0.36531	0.82195	0.35324
0.53536	0.40837	0.79663	0.36143	0.82555	0.35186
0.62257	0.3286	0.78903	0.33639	0.82438	0.35065
0.59819	0.31813	0.77148	0.35232	0.82553	0.34821
0.54833	0.29967	0.80545	0.35266	0.82502	0.34964
0.48928	0.3307	0.78853	0.34663	0.82112	0.35578
0.5747	0.38348	0.80529	0.33869	0.82451	0.34876
0.60923	0.40645	0.78633	0.33933	0.82	0.35377
0.55197	0.42682	0.79108	0.35179	0.82311	0.35204
0.47722	0.41632	0.79245	0.35215	0.83163	0.35511
0.6339	0.37616	0.80033	0.34432	0.82284	0.35191
0.56661	0.39911	0.76632	0.35145	0.81839	0.35982
0.62464	0.38904	0.78299	0.35268	0.81764	0.3548
0.5507	0.37082	0.77772	0.36256	0.81953	0.34732
0.52545	0.41488	0.79296	0.34777	0.83143	0.34582
0.52136	0.35246	0.79453	0.34829	0.8237	0.35098
0.55704	0.30386	0.79653	0.35396	0.82233	0.35692
0.57867	0.36093	0.79392	0.3443	0.82849	0.35007
0.5537	0.41798	0.79399	0.36059	0.82683	0.34919
0.62911	0.38287	0.78523	0.35328	0.82793	0.34856
0.55636	0.39241	0.78919	0.35112	0.81995	0.35624
0.59686	0.36826	0.78652	0.36317	0.80549	0.35505
0.54558	0.3862	0.80804	0.35719	0.81694	0.34894
0.5691	0.32037	0.77988	0.36783	0.81636	0.35417
0.61586	0.35462	0.79746	0.35169	0.81706	0.34997
0.57697	0.33827	0.78897	0.34504	0.81776	0.35216
0.54344	0.38462	0.81193	0.34742	0.81398	0.35362
0.56116	0.39957	0.79578	0.34797	0.81864	0.35381
0.58722	0.36564	0.7928	0.35422	0.81826	0.35043
0.50945	0.37611	0.80903	0.34918	0.82562	0.34874
0.62613	0.38073	0.78908	0.33362	0.81732	0.34437
0.61424	0.35875	0.81517	0.34811	0.81334	0.35796
0.59162	0.36055	0.79579	0.35527	0.82322	0.34712
0.59148	0.38469	0.81449	0.34576	0.81781	0.35542
0.65539	0.35376	0.79675	0.35198	0.80994	0.35659
0.61461	0.35854	0.79739	0.36347	0.8156	0.35599
0.66438	0.32323	0.80625	0.35734	0.81306	0.362
0.5793	0.38676	0.80638	0.35128	0.81249	0.35995
0.61799	0.3438	0.77809	0.35922	0.82138	0.35352
0.65037	0.34191	0.77763	0.34569	0.81672	0.35457
0.64399	0.34533	0.76077	0.346	0.8165	0.35288
0.67274	0.38296	0.74038	0.37321	0.81524	0.354
0.64602	0.37882	0.76296	0.35701	0.8227	0.35515
0.60033	0.3589	0.76583	0.36743	0.82179	0.34924
0.63502	0.38926	0.76817	0.35053	0.81834	0.35626
0.59383	0.39462	0.79701	0.34424	0.82378	0.35217
0.65017	0.35493	0.81062	0.34593	0.81915	0.35454
0.61472	0.38034	0.79838	0.35632	0.82195	0.35432
0.63338	0.38174	0.80874	0.34302	0.82082	0.3539
0.55946	0.36228	0.79199	0.35708	0.81053	0.35698
0.64496	0.39422	0.7981	0.34017	0.81664	0.35117
0.6761	0.36956	0.80324	0.36668	0.82065	0.35044
0.60342	0.36883	0.78922	0.36631	0.8198	0.35502
0.57832	0.38384	0.78929	0.3612	0.82048	0.35184
0.56695	0.30501	0.78167	0.35938	0.8223	0.35051
0.60794	0.37094	0.79314	0.36287	0.8241	0.3491
0.55955	0.38052	0.79116	0.3517	0.82228	0.35535
0.59767	0.37958	0.80795	0.35073	0.82577	0.35147
0.61539	0.38052	0.77783	0.36879	0.82259	0.35387
0.70035	0.36535	0.79233	0.34261	0.81958	0.35496
0.58697	0.34821	0.79805	0.35597	0.82665	0.35238
0.59717	0.38993	0.80347	0.35229	0.8218	0.35258
0.60072	0.3192	0.79995	0.36755	0.82681	0.34919
0.58534	0.36612	0.79461	0.34178	0.82355	0.34567
0.63105	0.36004	0.79523	0.35305	0.82835	0.34973
0.58769	0.37207	0.79531	0.35064	0.82944	0.35242
0.62719	0.35394	0.78169	0.35867	0.83129	0.34974
0.57193	0.40086	0.81355	0.35207	0.82301	0.35345
0.68017	0.40022	0.79412	0.34707	0.82508	0.34869
0.66143	0.35902	0.8008	0.346	0.81706	0.35276
0.61835	0.4109	0.80494	0.34635	0.82128	0.35891
0.51818	0.3636	0.80278	0.35305	0.82455	0.34995
0.50575	0.32352	0.80553	0.35641	0.82326	0.35541
0.56026	0.33543	0.80464	0.35307	0.82013	0.35399
0.64812	0.33824	0.81265	0.34515	0.8224	0.35608
0.5611	0.35212	0.81722	0.34392	0.82971	0.34628
0.54188	0.30655	0.79242	0.34357	0.82708	0.34536
0.55323	0.36324	0.80015	0.36056	0.82592	0.35756
0.64669	0.36654	0.82007	0.34303	0.83202	0.34359
0.53663	0.32999	0.79934	0.36179	0.81839	0.35631
0.572	0.35386	0.79574	0.37114	0.82095	0.35354
0.61075	0.38665	0.80843	0.35129	0.81557	0.35479
0.53443	0.31238	0.81168	0.35699	0.81368	0.36342
0.59617	0.33418	0.79154	0.34974	0.80921	0.34835
0.58133	0.41659	0.79673	0.34419	0.81034	0.35898
0.59725	0.34081	0.79012	0.3493	0.81508	0.34652
0.59482	0.34831	0.74651	0.35292	0.81211	0.35533
0.64332	0.36135	0.75524	0.3614	0.822	0.3481
0.63205	0.39823	0.74984	0.34823	0.81332	0.35634
0.52168	0.38817	0.79174	0.36088	0.82136	0.34662
0.56015	0.37062	0.78396	0.34963	0.82277	0.34581
0.6147	0.36834	0.80075	0.35311	0.82147	0.35247
0.62179	0.36066	0.77471	0.35508	0.8205	0.34882
0.54615	0.36961	0.8	0.35647	0.82121	0.34895
0.59107	0.38207	0.79108	0.34841	0.80804	0.35749
0.6231	0.37658	0.80852	0.35277	0.81909	0.35507
0.60663	0.37742	0.79645	0.35099	0.81912	0.35354
0.63847	0.33413	0.8154	0.3456	0.81509	0.35782
0.7019	0.35732	0.80035	0.35381	0.82281	0.34818
0.67377	0.34933	0.80265	0.34662	0.81913	0.35122
0.6352	0.32923	0.7877	0.36424	0.82197	0.35129
0.63342	0.37097	0.78024	0.3678	0.82035	0.34883
0.58061	0.3414	0.77607	0.365	0.82626	0.34935
0.60478	0.43404	0.76913	0.36203	0.82202	0.34835
0.58325	0.40263	0.79351	0.36213	0.81498	0.35598
0.58388	0.3756	0.79518	0.36109	0.81993	0.35364
0.65266	0.33717	0.80883	0.35485	0.81988	0.34741
0.636	0.37764	0.78904	0.37985	0.81324	0.35456
0.61245	0.35926	0.78179	0.36388	0.81385	0.35705
0.64664	0.3376	0.784	0.36171	0.8147	0.35588
0.61913	0.33341	0.76512	0.37497	0.82174	0.35091
0.63865	0.35028	0.80448	0.34781	0.82426	0.34736
0.56956	0.33932	0.77317	0.36442	0.81959	0.35343
0.62273	0.33859	0.80951	0.35488	0.8199	0.35543
0.53765	0.35927	0.77505	0.3665	0.81988	0.35352
0.60238	0.36128	0.81053	0.3406	0.82508	0.34609
0.57781	0.37543	0.79522	0.346	0.82731	0.35146
0.59915	0.28843	0.79635	0.35014	0.81724	0.35701
0.56992	0.34157	0.81033	0.35714	0.82538	0.35161
0.50634	0.37504	0.81206	0.34043	0.83063	0.3441
0.57772	0.42031	0.78594	0.36071	0.82806	0.3503
0.51645	0.30174	0.81557	0.34225	0.82384	0.34864
0.48585	0.37231	0.80072	0.35896	0.82524	0.3471
0.4388	0.38496	0.80582	0.34732	0.82708	0.34558
0.60435	0.29916	0.80174	0.35192	0.8225	0.35376
0.62979	0.3356	0.7992	0.36356	0.82878	0.34574
0.52444	0.35563	0.81472	0.34364	0.82304	0.35491
0.62689	0.2677	0.81984	0.34734	0.83146	0.34644
0.52731	0.38864	0.8081	0.35786	0.81606	0.35286
0.58041	0.38476	0.78289	0.34239	0.83684	0.34655
0.59253	0.32239	0.79544	0.36804	0.82793	0.35615
0.52567	0.38386	0.7767	0.36568	0.81951	0.35842
0.42927	0.343	0.77958	0.34471	0.82849	0.35259
0.51148	0.37277	0.76866	0.35701	0.83224	0.34536
0.62028	0.25557	0.77915	0.35517	0.82218	0.35046
0.53127	0.38063	0.78581	0.35346	0.82348	0.35705
0.59784	0.37033	0.78898	0.34625	0.82346	0.35209
0.54106	0.37304	0.79507	0.34971	0.82182	0.35132
0.62112	0.3654	0.78766	0.35812	0.82388	0.35004
0.58528	0.30527	0.79661	0.36094	0.81808	0.35541
0.54725	0.37447	0.80271	0.3489	0.82817	0.3539
0.56965	0.30852	0.8118	0.34623	0.82302	0.34995
0.62403	0.39306	0.80489	0.33506	0.82393	0.35537
0.50196	0.38731	0.7926	0.34418	0.8199	0.35846
0.5018	0.33452	0.79051	0.35672	0.8235	0.3456
0.46783	0.38257	0.80181	0.33652	0.81824	0.35392
0.54344	0.36009	0.78775	0.35047	0.80993	0.36019
0.47702	0.40514	0.78004	0.35778	0.81034	0.35606
0.54409	0.30865	0.77451	0.35533	0.82173	0.3575
0.44852	0.38006	0.79256	0.35735	0.81344	0.35661
0.51921	0.40626	0.80036	0.34388	0.81707	0.36003
0.54695	0.30871	0.80765	0.34904	0.8173	0.34523
0.49792	0.3382	0.79873	0.36376	0.81561	0.35753
0.56744	0.29708	0.79825	0.36151	0.81993	0.35233
0.48119	0.30267	0.76368	0.36129	0.81551	0.35889
0.50403	0.34689	0.7872	0.34879	0.81951	0.35217
0.50385	0.41407	0.78558	0.35303	0.81086	0.35411
0.5131	0.36526	0.76742	0.36409	0.81587	0.35448
0.56464	0.36809	0.78583	0.36428	0.81474	0.35075
0.49128	0.3068	0.7802	0.36029	0.82086	0.35608
0.50551	0.36153	0.80398	0.35972	0.81926	0.34892
0.56209	0.29634	0.79275	0.35146	0.81412	0.35355
0.536	0.3123	0.78679	0.35523	0.81812	0.35313
0.61655	0.32259	0.80953	0.34937	0.83018	0.34346
0.53797	0.33213	0.80692	0.35902	0.8145	0.35584
0.56275	0.32751	0.80832	0.35286	0.81446	0.35633
0.62926	0.34441	0.81778	0.34192	0.82275	0.35184
0.58985	0.36433	0.79478	0.36031	0.82302	0.3582
0.52138	0.38035	0.81021	0.35542	0.82104	0.35301
0.52132	0.34856	0.80829	0.35125	0.82659	0.35256
0.55709	0.36086	0.80661	0.34474	0.82194	0.34879
0.58163	0.37774	0.8119	0.3573	0.815	0.35771
0.57267	0.38206	0.81884	0.34539	0.8056	0.3622
0.52815	0.41264	0.81793	0.35905	0.82254	0.3597
0.56388	0.45804	0.8082	0.34031	0.81862	0.35086
0.59833	0.35847	0.79139	0.35885	0.82552	0.34792
0.58278	0.34372	0.80074	0.33198	0.82365	0.34839
0.57063	0.31285	0.78814	0.36628	0.82142	0.35115
0.52644	0.35866	0.79261	0.35128	0.81785	0.34654
0.58809	0.36168	0.77455	0.34842	0.82204	0.35079
0.5496	0.34837	0.77661	0.3567	0.82364	0.34396
0.60617	0.32676	0.79566	0.35792	0.82248	0.35946
0.60623	0.35679	0.79036	0.31863	0.8217	0.35329
0.53084	0.39101	0.7842	0.35715	0.82352	0.35164
0.58825	0.34287	0.81216	0.34292	0.82059	0.35226
0.62068	0.40085	0.81212	0.34609	0.81811	0.35699
0.58496	0.37436	0.79916	0.35325	0.82587	0.34943
0.57098	0.37606	0.8065	0.36136	0.82219	0.35142
0.52992	0.3761	0.79014	0.34573	0.82584	0.35621
0.61535	0.3071	0.81068	0.3575	0.81536	0.35598
0.52609	0.30846	0.78831	0.36165	0.82945	0.34565
0.55916	0.4336	0.7965	0.34264	0.82986	0.35041
0.54788	0.36061	0.80382	0.34871	0.82279	0.35027
0.67146	0.34534	0.79028	0.358	0.82378	0.35457
0.43273	0.33393	0.78798	0.35859	0.81267	0.34846
0.51778	0.32161	0.79615	0.36323	0.81984	0.35136
0.6884	0.34555	0.78599	0.34348	0.81563	0.35797
0.52995	0.29344	0.78287	0.34459	0.82966	0.34628
0.50279	0.34324	0.79477	0.36019	0.82189	0.35121
0.59731	0.30042	0.78382	0.35606	0.81911	0.35696
0.54307	0.2922	0.78219	0.34162	0.82462	0.34919
0.5341	0.38631	0.79566	0.35223	0.81555	0.35683
0.55564	0.40881	0.77173	0.36979	0.82909	0.35121
0.54818	0.37509	0.79916	0.34242	0.82228	0.35225
0.44977	0.2812	0.77953	0.35805	0.81924	0.35853
0.56393	0.29367	0.77736	0.37135	0.81898	0.34805
0.58519	0.36736	0.80513	0.33953	0.82536	0.35324
0.44205	0.39515	0.80343	0.36036	0.82453	0.35089
0.58679	0.27714	0.78803	0.35367	0.80419	0.36214
0.45445	0.36072	0.80271	0.37004	0.82185	0.35585
0.53333	0.3563	0.79855	0.36542	0.81145	0.35887
0.52261	0.32922	0.81174	0.35865	0.82467	0.35563
0.51725	0.29739	0.80655	0.35231	0.82389	0.35004
0.69003	0.40083	0.8163	0.35034	0.81962	0.34905
0.58261	0.39271	0.80682	0.36141	0.82315	0.34532
0.56902	0.36651	0.80775	0.35719	0.81569	0.34753
0.54975	0.34928	0.79984	0.34748	0.81496	0.34935
0.59533	0.40169	0.80635	0.34835	0.81131	0.35566
0.60182	0.37039	0.8142	0.33291	0.82129	0.35454
0.53118	0.35625	0.80458	0.35046	0.81028	0.35621
0.52134	0.3738	0.75367	0.3593	0.81883	0.3537
0.5439	0.38391	0.76719	0.3431	0.81781	0.35256
0.55332	0.37705	0.78653	0.35044	0.80818	0.35516
0.52468	0.41128	0.78397	0.35981	0.82043	0.35506
0.6088	0.34588	0.79203	0.36589	0.82479	0.34853
0.60236	0.29178	0.7854	0.34935	0.81969	0.35378
0.59758	0.39431	0.77868	0.35984	0.81471	0.35943
0.63065	0.35878	0.82549	0.35268	0.82455	0.35367
0.5333	0.39209	0.80187	0.35436	0.81856	0.35608
0.70786	0.31904	0.79857	0.349	0.81772	0.34877
0.55609	0.31826	0.80895	0.35586	0.82579	0.35511
0.61332	0.3927	0.81208	0.35891	0.82115	0.35106
0.61175	0.3665	0.80395	0.35183	0.81295	0.35841
0.6194	0.34683	0.80059	0.34996	0.82561	0.34973
0.68446	0.33373	0.81349	0.34728	0.82636	0.35086
0.59287	0.39315	0.80188	0.34676	0.8235	0.35144
0.65481	0.35219	0.79353	0.35988	0.83036	0.34184
0.60358	0.39451	0.76571	0.36016	0.814	0.34982
0.60079	0.35687	0.81861	0.34242	0.82684	0.34655
0.70235	0.34527	0.79697	0.36122	0.81643	0.35024
0.6347	0.37363	0.80173	0.35147	0.81512	0.35415
0.67065	0.3772	0.79668	0.35987	0.81648	0.35798
0.61654	0.35735	0.78817	0.3547	0.82216	0.35195
0.62976	0.30848	0.78484	0.35486	0.81708	0.35371
0.63948	0.41159	0.79798	0.35789	0.82246	0.35321
0.63284	0.33187	0.77505	0.34261	0.81726	0.35798
0.62149	0.37598	0.77489	0.36633	0.82397	0.3532
0.62444	0.36472	0.78739	0.34854	0.82409	0.34914
0.67474	0.32077	0.8037	0.34787	0.82543	0.34767
0.54702	0.32715	0.7976	0.35095	0.82626	0.34812
0.6026	0.38045	0.80555	0.3548	0.81868	0.3557
0.64522	0.32975	0.80627	0.35346	0.82157	0.35191
0.65497	0.39196	0.80514	0.34754	0.82376	0.35511
0.65801	0.41239	0.79061	0.35616	0.83026	0.3471
0.63733	0.34608	0.79596	0.34909	0.82147	0.3542
0.61978	0.37627	0.80087	0.34357	0.82678	0.35191
0.63526	0.36604	0.79922	0.36664	0.82459	0.35487
0.55602	0.32891	0.79831	0.35551	0.82132	0.35923
0.66614	0.34581	0.80975	0.35131	0.82555	0.35575
0.63423	0.39163	0.81213	0.3457	0.82465	0.34699
0.65442	0.35313	0.81316	0.3463	0.82024	0.35104
0.51876	0.42207	0.80803	0.35871	0.81748	0.35695
0.55826	0.34579	0.80469	0.34614	0.82032	0.35115
0.6365	0.36142	0.8078	0.34073	0.81072	0.35699
0.60119	0.3132	0.80031	0.35169	0.81711	0.3498
0.6136	0.34458	0.77588	0.35422	0.82654	0.3494
0.63333	0.30633	0.78422	0.32298	0.82684	0.35227
0.64649	0.32303	0.78893	0.34942	0.81743	0.34125
0.57103	0.38045	0.79065	0.36087	0.82062	0.35016
0.64265	0.37105	0.79861	0.35245	0.82476	0.35035
0.56176	0.38044	0.77893	0.35558	0.8168	0.3526
0.62744	0.34932	0.80564	0.34794	0.80307	0.35317
0.61625	0.37378	0.79489	0.35828	0.8215	0.34509
0.5441	0.42268	0.77449	0.36962	0.81675	0.3443
0.62747	0.36369	0.80534	0.34908	0.81331	0.35053
0.50959	0.38145	0.81679	0.34982	0.81415	0.35522
0.50957	0.39706	0.78523	0.34466	0.81277	0.35158
0.6864	0.33225	0.79883	0.34845	0.8057	0.3497
0.60896	0.37778	0.79451	0.35234	0.8014	0.35878
0.57487	0.37308	0.80155	0.35111	0.80556	0.35558
0.53091	0.37196	0.80283	0.3507	0.81847	0.35665
0.58004	0.34875	0.79349	0.34274	0.822	0.34871
0.57153	0.35913	0.79684	0.35397	0.81546	0.35109
0.60577	0.34848	0.79024	0.36219	0.8177	0.35517
0.56755	0.38745	0.8018	0.34296	0.82545	0.34836
0.66581	0.34594	0.79821	0.35252	0.81337	0.36698
0.62531	0.35045	0.79296	0.35436	0.82497	0.34993
0.62139	0.33877	0.78398	0.35555	0.82021	0.35489
0.60186	0.35453	0.79782	0.34809	0.81904	0.34758
0.61773	0.37835	0.79877	0.34088	0.81709	0.35467
0.57984	0.3762	0.77372	0.36189	0.81191	0.35349
0.6067	0.39998	0.76437	0.34106	0.8202	0.35344
0.57933	0.37047	0.77509	0.34434	0.8157	0.35949
0.60108	0.34013	0.77506	0.35658	0.81437	0.3595
0.67974	0.37584	0.78699	0.35442	0.8209	0.35485
0.57481	0.36848	0.80021	0.35982	0.8177	0.35264
0.57714	0.34311	0.80409	0.35212	0.82298	0.34963
0.60212	0.39547	0.78255	0.35936	0.81426	0.35494
0.65261	0.32852	0.80335	0.35872	0.82133	0.34779
0.63339	0.37685	0.79043	0.36048	0.81194	0.35977
0.60246	0.3455	0.79468	0.3484	0.82492	0.34766
0.57275	0.36985	0.79726	0.36228	0.82	0.35001
0.5854	0.3974	0.79056	0.36518	0.82496	0.35248
0.56658	0.30458	0.81052	0.36689	0.82716	0.34859
0.57661	0.36358	0.80279	0.36131	0.82372	0.34786
0.57888	0.39285	0.81714	0.34747	0.82309	0.34742
0.62655	0.36639	0.8147	0.35024	0.81479	0.36092
0.57947	0.36737	0.81587	0.3447	0.82673	0.35477
0.60247	0.3622	0.79275	0.36188	0.81461	0.35499
0.64542	0.3517	0.81578	0.35129	0.82564	0.34688
0.59764	0.39256	0.79838	0.34159	0.82215	0.34846
0.51468	0.39322	0.79416	0.3635	0.81807	0.36027
0.53695	0.39581	0.79102	0.37078	0.8236	0.35024
0.67459	0.26693	0.78468	0.34647	0.82957	0.34385
0.53001	0.4323	0.79693	0.35099	0.82134	0.35384
0.59428	0.3879	0.78377	0.35047	0.82021	0.35432
0.58548	0.37624	0.79927	0.35049	0.83454	0.34274
0.67971	0.3134	0.80525	0.33074	0.82512	0.35242
0.59201	0.36284	0.80141	0.3445	0.81933	0.36048
0.62537	0.34272	0.79985	0.3492	0.8256	0.34988
0.57862	0.37572	0.7934	0.36173	0.82324	0.35088
0.51998	0.2983	0.80739	0.35511	0.82842	0.34836
0.48111	0.41569	0.79045	0.35302	0.82406	0.35322
0.5729	0.3787	0.79989	0.35449	0.83013	0.35056
0.5395	0.36586	0.80065	0.3485	0.8273	0.3467
0.56978	0.32991	0.80745	0.34183	0.82488	0.34861
0.56727	0.38914	0.79144	0.36054	0.81953	0.35553
0.60418	0.32839	0.79831	0.35648	0.8196	0.35295
0.58673	0.39338	0.79098	0.3484	0.81882	0.34589
0.5155	0.36973	0.7793	0.36055	0.81522	0.35749
0.5406	0.37411	0.80601	0.36048	0.81414	0.35124
0.53524	0.34582	0.78199	0.35543	0.81766	0.36033
0.56196	0.41454	0.80101	0.35423	0.81822	0.35538
0.46528	0.35777	0.79423	0.3624	0.81987	0.34755
0.53376	0.42249	0.78786	0.36831	0.81467	0.34961
0.53716	0.35465	0.7888	0.35998	0.81496	0.35104
0.51597	0.24262	0.8111	0.35685	0.81172	0.35153
0.64454	0.38851	0.79975	0.36513	0.81233	0.35484
0.56452	0.32942	0.80536	0.34374	0.82461	0.35188
0.54312	0.39725	0.78493	0.36353	0.82836	0.34475
0.59886	0.29734	0.80537	0.34975	0.81502	0.35465
0.58568	0.29948	0.79282	0.35209	0.81569	0.35675
0.55398	0.32029	0.81431	0.35044	0.81398	0.35739
0.46638	0.35534	0.80627	0.37215	0.82267	0.35074
0.5454	0.32133	0.79553	0.35447	0.82377	0.34461
0.57175	0.39603	0.78567	0.3519	0.81092	0.35406
0.5957	0.34316	0.79979	0.34331	0.81786	0.35222
0.48573	0.36145	0.77564	0.35703	0.80931	0.35975
0.45112	0.36323	0.78306	0.35314	0.81738	0.35127
0.52504	0.30971	0.75483	0.3628	0.82087	0.3457
0.52615	0.30639	0.77684	0.34988	0.82101	0.35414
0.46706	0.37237	0.77673	0.32659	0.8223	0.35514
0.49803	0.30458	0.79425	0.35685	0.817	0.35021
0.59942	0.313	0.79449	0.34697	0.81687	0.35009
0.57181	0.30552	0.80534	0.34065	0.82013	0.35249
0.4979	0.34702	0.78564	0.35245	0.82386	0.35561
0.58352	0.36256	0.78996	0.35587	0.81615	0.35667
0.52026	0.37821	0.79642	0.34814	0.82583	0.34188
0.61315	0.38752	0.80152	0.35963	0.81681	0.35819
0.63345	0.4146	0.79397	0.35946	0.82229	0.35264
0.49904	0.33579	0.81166	0.34627	0.82283	0.3485
0.5829	0.32743	0.81872	0.34213	0.82526	0.34797
0.5027	0.36723	0.80614	0.35778	0.81841	0.35027
0.5011	0.32786	0.80486	0.35221	0.81825	0.3515
0.53223	0.38043	0.80685	0.35445	0.82305	0.34967
0.63305	0.33887	0.80174	0.34472	0.82214	0.34948
0.53216	0.36285	0.81539	0.3527	0.82708	0.3463
0.52411	0.41496	0.79599	0.35522	0.8175	0.35092
0.52028	0.37544	0.79211	0.36626	0.82504	0.34769
0.6154	0.34024	0.78195	0.35364	0.8207	0.34811
0.56508	0.34694	0.78703	0.34851	0.82802	0.35576
0.56103	0.32438	0.78588	0.35874	0.82303	0.34823
0.61117	0.31465	0.7975	0.35258	0.81374	0.35901
0.64085	0.3818	0.79503	0.36495	0.81289	0.35251
0.52131	0.37556	0.80415	0.35016	0.81903	0.35234
0.52054	0.39055	0.80835	0.36098	0.81812	0.35481
0.58847	0.40616	0.79423	0.35964	0.8124	0.34957
0.57201	0.28151	0.76788	0.35561	0.81599	0.34976
0.57596	0.33637	0.79457	0.34449	0.82358	0.35098
0.50181	0.36393	0.79293	0.35761	0.8272	0.35276
0.52881	0.34535	0.79993	0.32949	0.81338	0.35679
0.65576	0.35602	0.76802	0.36342	0.82392	0.35138
0.63138	0.33832	0.81663	0.34029	0.81764	0.35575
0.56168	0.3818	0.79531	0.35906	0.82392	0.35098
0.47319	0.34965	0.79012	0.35434	0.81953	0.36249
0.54112	0.32462	0.7946	0.34566	0.8209	0.36101
0.45557	0.32961	0.79244	0.34796	0.82733	0.34767
0.57365	0.40028	0.80056	0.34157	0.81959	0.35835
0.54002	0.38089	0.80562	0.34005	0.82271	0.35591
0.61192	0.36858	0.79927	0.33534	0.83098	0.34965
0.63191	0.29674	0.80465	0.33589	0.82542	0.34787
0.58197	0.31109	0.78189	0.34501	0.82662	0.35158
0.54278	0.28817	0.7983	0.34581	0.82451	0.35234
0.56266	0.2455	0.8061	0.35812	0.82792	0.35005
0.55068	0.33868	0.78367	0.35718	0.82185	0.35404
0.45135	0.39928	0.79133	0.35861	0.81355	0.35439
0.55431	0.366	0.79947	0.35238	0.81129	0.36221
0.57702	0.299	0.80537	0.34818	0.81023	0.36047
0.57088	0.33892	0.80738	0.34627	0.80541	0.36117
0.60452	0.30194	0.80302	0.34926	0.81032	0.35444
0.53714	0.32967	0.7809	0.35024	0.8153	0.34347
0.4878	0.3199	0.78892	0.35845	0.8224	0.34946
0.63522	0.36554	0.77963	0.35491	0.81464	0.34739
0.62798	0.35043	0.79496	0.3467	0.82527	0.34692
0.52575	0.36814	0.79143	0.34502	0.82643	0.34518
0.60627	0.38038	0.77518	0.37338	0.81618	0.34957
0.50998	0.35021	0.78111	0.3467	0.82664	0.34313
0.57424	0.37429	0.75311	0.37799	0.81394	0.35475
0.52068	0.38343	0.78243	0.3335	0.81755	0.3545
0.52973	0.33232	0.79634	0.35327	0.81704	0.34236
0.50504	0.27403	0.79425	0.34979	0.81563	0.34988
0.61393	0.32203	0.78713	0.35928	0.82332	0.34648
0.57089	0.34399	0.78389	0.35405	0.8171	0.34621
0.58571	0.35636	0.79693	0.346	0.81181	0.35916
0.56222	0.36761	0.79037	0.35274	0.81293	0.35009
0.59871	0.41525	0.81096	0.34427	0.80736	0.35211
0.55742	0.35759	0.80075	0.35316	0.82047	0.34604
0.54416	0.39713	0.81095	0.34354	0.81944	0.35039
0.5915	0.37118	0.79662	0.34844	0.80564	0.36367
0.50935	0.36004	0.82545	0.34197	0.82342	0.35117
0.54699	0.34076	0.8061	0.34932	0.82141	0.35192
0.60216	0.34275	0.80884	0.34994	0.81667	0.35673
0.56003	0.37056	0.81344	0.35369	0.82078	0.35683
0.62629	0.33386	0.81611	0.34008	0.81595	0.34651
0.63369	0.37254	0.79509	0.34945	0.81747	0.34753
0.55044	0.36098	0.80014	0.34894	0.81747	0.35483
0.63784	0.33881	0.80324	0.35231	0.8117	0.35467
0.60141	0.32574	0.80362	0.36179	0.82151	0.35718
0.60705	0.41098	0.79967	0.36095	0.81538	0.35531
0.58421	0.38433	0.79691	0.35497	0.81778	0.3518
0.57477	0.35818	0.79896	0.36035	0.82398	0.35258
0.67299	0.3691	0.81004	0.35056	0.82441	0.35071
0.70197	0.37051	0.80552	0.34734	0.81889	0.35709
0.57247	0.38475	0.80544	0.34979	0.81872	0.35734
0.61646	0.3818	0.79489	0.35728	0.82059	0.35573
0.64156	0.35009	0.78555	0.35435	0.82455	0.34583
0.64582	0.38621	0.75674	0.36072	0.8181	0.35453
0.60572	0.37639	0.80707	0.34776	0.81585	0.35263
0.61444	0.38925	0.78719	0.34241	0.81854	0.35761
0.6735	0.37153	0.79002	0.35373	0.81326	0.35948
0.66499	0.33204	0.79763	0.35572	0.82205	0.34399
0.63336	0.36331	0.79029	0.3446	0.81376	0.364
0.67009	0.38347	0.80597	0.35257	0.82187	0.35753
0.67859	0.34392	0.78864	0.35759	0.82381	0.35558
0.67166	0.34062	0.7888	0.36101	0.82162	0.35327
0.64869	0.36858	0.7913	0.35442	0.81988	0.35099
0.62066	0.36274	0.77958	0.36584	0.81618	0.35017
0.61842	0.40858	0.79541	0.34219	0.81682	0.35106
0.6319	0.35595	0.78492	0.35755	0.81938	0.34987
0.60734	0.35245	0.81614	0.35046	0.82149	0.35436
0.66531	0.3559	0.77551	0.34876	0.82649	0.34963
0.6081	0.3831	0.78488	0.34897	0.82236	0.35164
0.66962	0.36805	0.78314	0.36044	0.82316	0.34841
0.68767	0.37927	0.7933	0.3501	0.82518	0.35196
0.65611	0.41225	0.78956	0.34272	0.82949	0.34725
0.67778	0.38476	0.80369	0.35084	0.81328	0.35917
0.61079	0.33236	0.79958	0.35455	0.81914	0.35045
0.65462	0.35066	0.79432	0.33937	0.8298	0.34502
0.58294	0.37805	0.79028	0.34083	0.81983	0.35963
0.62454	0.37279	0.80459	0.34888	0.82943	0.34951
0.56582	0.37798	0.7887	0.36733	0.82343	0.35682
0.62603	0.36152	0.79401	0.34263	0.81839	0.35232
0.58961	0.34525	0.79533	0.34338	0.82278	0.35502
0.62862	0.34608	0.78387	0.34767	0.81552	0.35969
0.64026	0.31617	0.77794	0.35402	0.81661	0.35611
0.59381	0.36099	0.77684	0.36112	0.82582	0.3492
0.58696	0.32661	0.77053	0.35415	0.81738	0.35114
0.60841	0.343	0.76906	0.35619	0.81876	0.3544
0.54512	0.38097	0.76709	0.36451	0.81775	0.35502
0.60204	0.38923	0.78959	0.35077	0.80657	0.35047
0.53841	0.39544	0.79023	0.35452	0.80858	0.35831
0.60156	0.36546	0.80823	0.33728	0.81917	0.35404
0.60658	0.31124	0.79167	0.35642	0.80948	0.35545
0.58178	0.3763	0.80409	0.3547	0.81918	0.35432
0.58884	0.38782	0.80944	0.3491	0.81373	0.34866
0.58206	0.40592	0.80858	0.33651	0.81035	0.35466
0.60029	0.40741	0.81424	0.34905	0.8142	0.35394
0.57549	0.37312	0.79609	0.35372	0.81393	0.34821
0.57935	0.33277	0.81087	0.34757	0.82604	0.34387
0.70544	0.32661	0.818	0.34756	0.81459	0.34521
0.60834	0.32296	0.78318	0.34966	0.82245	0.34988
0.55186	0.32666	0.78998	0.3561	0.80921	0.35179
0.55565	0.3541	0.7856	0.35374	0.81114	0.35801
0.58407	0.36506	0.80596	0.34408	0.81084	0.35229
0.62678	0.32953	0.80744	0.35079	0.8074	0.35857
0.65482	0.32089	0.79635	0.35586	0.81255	0.34883
0.65501	0.35586	0.79773	0.34853	0.7983	0.35204
0.60411	0.34249	0.80723	0.35965	0.81184	0.35392
0.63646	0.31909	0.80898	0.34667	0.81224	0.35797
0.57956	0.36237	0.81143	0.35366	0.81693	0.36646
0.56415	0.37718	0.82117	0.35917	0.80874	0.36446
0.67678	0.3455	0.79834	0.34644	0.81048	0.35878
0.56954	0.37545	0.79425	0.35733	0.8095	0.35627
0.56676	0.41034	0.78914	0.35085	0.82319	0.34574
0.70507	0.36134	0.79401	0.3472	0.80909	0.35666
0.61132	0.34811	0.81056	0.34015	0.81137	0.35275
0.64258	0.36096	0.77525	0.35601	0.81641	0.35945
0.63087	0.38037	0.76473	0.35682	0.81834	0.36177
0.61671	0.36653	0.77225	0.37037	0.8199	0.3491
0.5199	0.37895	0.79088	0.36631	0.82158	0.3525
0.57935	0.39544	0.78876	0.35038	0.82502	0.34518
0.54689	0.39844	0.80114	0.34074	0.8195	0.35696
0.58801	0.34125	0.78877	0.35629	0.82236	0.35858
0.6092	0.39139	0.78673	0.35355	0.81712	0.35784
0.64538	0.37498	0.79696	0.35276	0.81745	0.35576
0.57822	0.37037	0.80605	0.35333	0.81702	0.3517
0.60689	0.39709	0.80045	0.35344	0.81953	0.35376
0.61033	0.3495	0.78901	0.36444	0.81472	0.35531
0.56299	0.37938	0.78453	0.3779	0.82368	0.35068
0.59816	0.31405	0.79312	0.35305	0.82426	0.35133
0.60324	0.36432	0.78883	0.36151	0.81956	0.35368
0.50709	0.31508	0.79145	0.35033	0.81651	0.35442
0.49235	0.38178	0.80641	0.34136	0.82619	0.34933
0.60559	0.3698	0.78319	0.36233	0.81317	0.35265
0.5827	0.44403	0.78922	0.34355	0.8152	0.34699
0.61121	0.3392	0.7777	0.35744	0.81919	0.35516
0.64954	0.35171	0.76109	0.36045	0.82048	0.3505
0.55526	0.29779	0.79594	0.35856	0.8209	0.35165
0.55251	0.32414	0.78098	0.34209	0.81533	0.3535
0.53112	0.36971	0.77319	0.36065	0.82338	0.34875
0.55827	0.34032	0.81496	0.33548	0.81628	0.35968
0.55729	0.36125	0.8042	0.34732	0.82865	0.35084
0.51096	0.35426	0.80615	0.36835	0.82239	0.34847
0.51639	0.34838	0.77186	0.3618	0.81749	0.35275
0.55762	0.35523	0.77532	0.35607	0.82094	0.35436
0.55847	0.36153	0.79897	0.34291	0.82241	0.35168
0.51132	0.32127	0.80777	0.34564	0.81497	0.35436
0.50874	0.32197	0.80181	0.34197	0.82973	0.3495
0.51544	0.37228	0.77415	0.36153	0.82633	0.34953
0.44929	0.33913	0.78917	0.35881	0.8242	0.35042
0.5474	0.36371	0.77421	0.36127	0.8254	0.35139
0.5603	0.38078	0.77499	0.36034	0.82304	0.3498
0.46934	0.36036	0.79237	0.35379	0.82727	0.34578
0.60078	0.37292	0.78798	0.35284	0.828	0.34859
0.54456	0.26266	0.77472	0.35783	0.82211	0.35066
0.50418	0.35271	0.79768	0.36359	0.81913	0.35089
0.63122	0.35179	0.78738	0.36491	0.81824	0.35487
0.5284	0.40406	0.81032	0.34257	0.8168	0.34368
0.61276	0.32428	0.80305	0.35963	0.81342	0.35706
0.48995	0.32319	0.80996	0.35414	0.80568	0.35628
0.57028	0.33753	0.82088	0.35277	0.80743	0.34672
0.52108	0.40244	0.801	0.35476	0.81756	0.35218
0.6184	0.33566	0.79376	0.35751	0.81123	0.35285
0.60285	0.37013	0.78235	0.3549	0.81803	0.35397
0.59118	0.3348	0.79372	0.33608	0.81903	0.35237
0.59886	0.38121	0.77704	0.35964	0.81113	0.34198
0.62954	0.44144	0.77146	0.35877	0.82905	0.34141
0.55584	0.37051	0.7969	0.34032	0.80843	0.36004
0.58349	0.29142	0.76347	0.36511	0.81114	0.35762
0.60883	0.39374	0.80185	0.35554	0.82016	0.3503
0.63883	0.36402	0.79335	0.37005	0.8101	0.35268
0.56155	0.31972	0.79534	0.35329	0.8064	0.36025
0.66389	0.31561	0.7971	0.34364	0.8268	0.34156
0.61082	0.29442	0.80138	0.34386	0.81486	0.34426
0.45971	0.32373	0.79465	0.35641	0.81407	0.35851
0.50132	0.33535	0.80897	0.34099	0.79047	0.36456
0.47661	0.42802	0.80491	0.35579	0.8206	0.35296
0.52328	0.41341	0.80992	0.3491	0.80161	0.36036
0.5452	0.3944	0.79767	0.34285	0.81132	0.35195
0.55992	0.33805	0.798	0.35671	0.81183	0.34353
0.58824	0.3457	0.80379	0.35103	0.82006	0.35252
0.49936	0.38841	0.78686	0.35431	0.81454	0.35563
0.48519	0.41227	0.78938	0.34452	0.80975	0.35373
0.4559	0.35236	0.79585	0.34924	0.81758	0.355
0.48443	0.35519	0.78238	0.36675	0.82544	0.34343
0.60912	0.36006	0.79348	0.36152	0.81128	0.35265
0.51764	0.34567	0.7886	0.3572	0.81225	0.35767
0.5772	0.36333	0.77915	0.36134	0.81446	0.36063
0.48244	0.37572	0.80002	0.34915	0.81753	0.34627
0.50989	0.36726	0.80573	0.35807	0.81915	0.35232
0.62701	0.37607	0.80121	0.35546	0.8173	0.35267
0.60925	0.29882	0.8067	0.35675	0.81431	0.35831
0.54307	0.36613	0.80454	0.35874	0.82077	0.35781
0.57034	0.37261	0.80003	0.35861	0.81465	0.35459
0.57358	0.33695	0.79267	0.36368	0.82689	0.35486
0.51436	0.40163	0.79449	0.35245	0.82238	0.34567
0.56054	0.30565	0.8097	0.34648	0.82362	0.35497
0.52841	0.36302	0.79419	0.3608	0.82104	0.35125
0.455	0.28529	0.80189	0.35938	0.82523	0.34736
0.58453	0.31512	0.80014	0.35916	0.8228	0.35359
0.61262	0.32456	0.79589	0.36293	0.82129	0.35068
0.62098	0.40025	0.77552	0.35819	0.82227	0.35823
0.56506	0.38376	0.79011	0.35089	0.82382	0.34886
0.55501	0.36013	0.78626	0.36233	0.82251	0.35027
0.5904	0.35306	0.80216	0.33783	0.82819	0.35249
0.58276	0.38586	0.80214	0.35537	0.824	0.34813
0.56993	0.33189	0.78294	0.36209	0.8162	0.35306
0.5121	0.33201	0.7864	0.34805	0.81884	0.36118
0.56875	0.30728	0.80433	0.34166	0.81821	0.35632
0.55913	0.4402	0.7922	0.35988	0.8182	0.35439
0.51238	0.33648	0.7996	0.35333	0.81958	0.35607
0.54753	0.31636	0.79732	0.33756	0.81371	0.3545
0.607	0.37374	0.80628	0.34841	0.80992	0.35094
0.57641	0.33341	0.7972	0.34759	0.81503	0.35743
0.57407	0.33758	0.81565	0.35678	0.81672	0.35753
0.5599	0.32832	0.80691	0.35323	0.81797	0.35434
0.6786	0.33614	0.75492	0.3763	0.83128	0.34346
0.52361	0.36422	0.76846	0.35338	0.82261	0.3466
0.48727	0.35953	0.79874	0.34348	0.81976	0.35418
0.62069	0.39346	0.7992	0.34536	0.82256	0.35821
0.54212	0.41619	0.79753	0.34002	0.81709	0.34757
0.48744	0.33529	0.78188	0.35084	0.82459	0.34879
0.50111	0.36594	0.80741	0.35155	0.82332	0.35343
0.55109	0.36472	0.79467	0.3526	0.8234	0.35242
0.50109	0.36499	0.80575	0.3484	0.81862	0.35616
0.51114	0.46016	0.79924	0.35523	0.82431	0.34902
0.53076	0.36382	0.80218	0.34808	0.82265	0.35682
0.54262	0.33929	0.80363	0.35126	0.82458	0.35318
0.67132	0.35944	0.8172	0.34518	0.81737	0.35699
0.57486	0.33352	0.80142	0.35184	0.82017	0.34831
0.62766	0.36566	0.81333	0.34037	0.81748	0.3539
0.43582	0.29021	0.79848	0.35742	0.82131	0.35444
0.49194	0.30199	0.78506	0.33583	0.81181	0.35318
0.53192	0.38525	0.77478	0.34252	0.80767	0.34935
0.64268	0.34208	0.77986	0.35184	0.7963	0.35967
0.59445	0.41833	0.77712	0.34875	0.81489	0.34936
0.55513	0.3511	0.7865	0.34372	0.80404	0.3543
0.56106	0.35082	0.74653	0.36483	0.80573	0.35356
0.55639	0.36135	0.79393	0.35918	0.81303	0.35027
0.69135	0.34747	0.79104	0.33887	0.80455	0.35222
0.5424	0.41094	0.77669	0.34453	0.8123	0.35401
0.56421	0.33545	0.78793	0.34449	0.81423	0.34
0.59901	0.36804	0.80026	0.34818	0.80076	0.36388
0.56665	0.37695	0.78931	0.35524	0.8078	0.35029
0.67151	0.33784	0.77983	0.36125	0.82032	0.34243
0.71273	0.36614	0.78707	0.35321	0.81514	0.35532
0.61648	0.38342	0.80274	0.34735	0.80678	0.35387
0.49608	0.31824	0.79325	0.35656	0.81665	0.34865
0.60256	0.3583	0.81334	0.35544	0.80609	0.36002
0.56546	0.39239	0.81134	0.34974	0.81663	0.34743
0.58621	0.30844	0.80106	0.33448	0.81448	0.35641
0.61709	0.37373	0.79883	0.34468	0.80937	0.35887
0.631	0.38225	0.81271	0.3592	0.80585	0.36061
0.63055	0.33794	0.8041	0.36105	0.81387	0.35607
0.59583	0.36548	0.79262	0.35921	0.81928	0.35564
0.63936	0.33629	0.80399	0.36148	0.81593	0.34564
0.59192	0.37025	0.80464	0.35977	0.82074	0.35753
0.62621	0.34914	0.79999	0.35203	0.81216	0.3492
0.63197	0.39049	0.79895	0.35783	0.81608	0.35297
0.60578	0.33239	0.80226	0.3528	0.81357	0.35306
0.63079	0.38434	0.79737	0.35006	0.8163	0.35476
0.61107	0.35668	0.7994	0.35242	0.82521	0.35165
0.59929	0.33248	0.78297	0.35529	0.82196	0.35424
0.64704	0.39186	0.80706	0.3599	0.81163	0.35695
0.62988	0.36384	0.80561	0.35605	0.81745	0.34905
0.63746	0.36922	0.81159	0.34802	0.82451	0.3473
0.67888	0.33737	0.80098	0.34108	0.82521	0.34591
0.67196	0.3622	0.79805	0.35796	0.82223	0.3472
0.66071	0.34744	0.80691	0.35573	0.82018	0.35435
0.63192	0.35108	0.81639	0.35219	0.81483	0.35449
0.69241	0.38001	0.81458	0.35329	0.82373	0.35284
0.66776	0.36031	0.80573	0.34814	0.82657	0.34929
0.64724	0.39348	0.79978	0.36296	0.82606	0.35069
0.61805	0.32255	0.81902	0.35435	0.82535	0.34758
0.67472	0.36704	0.81159	0.35322	0.81916	0.34705
0.61412	0.36615	0.78187	0.36586	0.82689	0.35006
0.61376	0.33989	0.78739	0.36266	0.81872	0.34814
0.61032	0.38346	0.78741	0.35424	0.82198	0.34754
0.66688	0.37351	0.78766	0.36953	0.82418	0.35075
0.65459	0.33659	0.76525	0.35118	0.82169	0.36073
0.58951	0.38153	0.80345	0.35662	0.81914	0.35074
0.47506	0.38934	0.79236	0.36336	0.82295	0.35188
0.65625	0.35003	0.79817	0.35189	0.82562	0.34725
0.55718	0.36859	0.78616	0.35785	0.82083	0.35363
0.60343	0.31278	0.80884	0.35025	0.8124	0.35027
0.52648	0.36344	0.80576	0.33733	0.82233	0.34826
0.6209	0.34812	0.79056	0.36253	0.81539	0.35544
0.63406	0.3458	0.7909	0.35756	0.82152	0.35009
0.58241	0.39946	0.8001	0.35932	0.82586	0.34418
0.59854	0.31872	0.79327	0.33874	0.81787	0.35565
0.65631	0.36215	0.78418	0.36003	0.82318	0.35983
0.53749	0.33074	0.79138	0.35996	0.82226	0.35177
0.55628	0.39574	0.80218	0.35696	0.82323	0.35049
0.6148	0.35679	0.80439	0.35178	0.82209	0.35418
0.57397	0.37894	0.77543	0.35775	0.81703	0.35257
0.57441	0.37085	0.80553	0.34882	0.81943	0.3525
0.57554	0.3705	0.80459	0.34902	0.81467	0.35887
0.65517	0.32741	0.798	0.35757	0.83347	0.3425
0.61184	0.37132	0.80699	0.34807	0.81825	0.35622
0.64241	0.34424	0.80264	0.34283	0.8164	0.35765
0.53538	0.34508	0.81753	0.35425	0.81923	0.35194
0.65166	0.35193	0.80472	0.34087	0.8191	0.35071
0.58079	0.39296	0.81159	0.3477	0.82525	0.34761
0.53619	0.31622	0.81044	0.34138	0.81943	0.34961
0.67546	0.39141	0.8046	0.34908	0.82065	0.35247
0.59494	0.39006	0.79749	0.36662	0.82082	0.34496
0.67552	0.34063	0.79631	0.35007	0.82091	0.35329
0.65027	0.34434	0.77448	0.35681	0.81163	0.35251
0.62296	0.34693	0.76911	0.36188	0.82466	0.34323
0.61422	0.35642	0.77062	0.34566	0.82299	0.34884
0.57583	0.36846	0.79024	0.35964	0.80415	0.35867
0.62251	0.37442	0.77487	0.34192	0.82328	0.34729
0.56203	0.32742	0.77018	0.35807	0.80838	0.34065
0.65288	0.32415	0.75926	0.35818	0.80844	0.35353
0.61248	0.38028	0.78469	0.35872	0.80113	0.35477
0.5072	0.35676	0.79461	0.35613	0.79229	0.35915
0.58675	0.30546	0.80524	0.33789	0.80465	0.34857
0.64535	0.38651	0.77386	0.35418	0.80715	0.35291
0.62676	0.32192	0.79798	0.34464	0.79791	0.36001
0.57408	0.36593	0.78826	0.3446	0.81729	0.3464
0.61405	0.37526	0.75678	0.34958	0.81484	0.34515
0.64535	0.33973	0.80135	0.35144	0.81442	0.35072
0.54217	0.39441	0.8187	0.35449	0.80273	0.36202
0.58273	0.36165	0.82091	0.34353	0.81566	0.35552
0.59914	0.32936	0.80291	0.36135	0.80668	0.35416
0.58506	0.37945	0.80584	0.34538	0.81986	0.34967
0.64378	0.35835	0.80444	0.35519	0.82097	0.34738
0.52158	0.41099	0.81942	0.34704	0.82328	0.34844
0.6236	0.37358	0.80209	0.35395	0.80657	0.35841
0.62534	0.39289	0.81272	0.34342	0.81187	0.35468
0.58735	0.32749	0.80993	0.35531	0.81525	0.35426
0.52946	0.39083	0.80792	0.34458	0.80091	0.35879
0.57048	0.39194	0.80441	0.3598	0.81016	0.35181
0.53332	0.42591	0.7981	0.35662	0.81164	0.35448
0.50213	0.41183	0.81028	0.34796	0.8226	0.35011
0.52686	0.38733	0.80877	0.35695	0.8112	0.35785
0.60526	0.41432	0.799	0.35999	0.8191	0.35522
0.64326	0.33969	0.80573	0.34918	0.81556	0.3578
0.49135	0.34046	0.8068	0.35301	0.8195	0.3527
0.62946	0.36732	0.8085	0.35789	0.80783	0.35438
0.5226	0.35395	0.80523	0.34983	0.8118	0.35543
0.62514	0.34151	0.80088	0.35259	0.82245	0.36061
0.47801	0.42637	0.79826	0.35909	0.81818	0.35673
0.54135	0.37685	0.80061	0.35236	0.82244	0.35306
0.56398	0.36802	0.81026	0.34187	0.8115	0.35803
0.57144	0.34293	0.80429	0.35661	0.81903	0.3531
0.51743	0.35447	0.81662	0.35328	0.82431	0.3515
0.49893	0.38546	0.81678	0.34243	0.82138	0.3504
0.51004	0.35631	0.7965	0.3653	0.816	0.35164
0.51564	0.40225	0.80913	0.34454	0.82112	0.35192
0.43608	0.3492	0.81186	0.35105	0.82232	0.34716
0.5878	0.43919	0.81966	0.35143	0.81697	0.35605
0.45373	0.32325	0.80642	0.35985	0.81723	0.3589
0.58564	0.34066	0.79413	0.3641	0.81761	0.35155
0.38354	0.39488	0.80897	0.34714	0.82267	0.34783
0.56535	0.36371	0.80719	0.34683	0.8201	0.35703
0.49122	0.37755	0.80188	0.34994	0.8167	0.34891
0.47639	0.40086	0.80833	0.35433	0.81503	0.34747
0.5073	0.32928	0.78186	0.35922	0.81766	0.34808
0.61313	0.37756	0.80441	0.34084	0.81378	0.35388
0.49383	0.36327	0.77525	0.35553	0.82154	0.34735
0.61004	0.32655	0.77365	0.35524	0.81265	0.35385
0.54186	0.41303	0.76737	0.34991	0.81549	0.35966
0.46092	0.3409	0.79422	0.35133	0.8153	0.35296
0.5657	0.39676	0.78696	0.3626	0.82102	0.35105
0.66744	0.34987	0.78478	0.36919	0.81896	0.34544
0.55057	0.35061	0.79714	0.35769	0.81322	0.35311
0.54691	0.36089	0.78926	0.34893	0.81564	0.35691
0.6019	0.35166	0.81782	0.34241	0.82899	0.34867
0.63922	0.32569	0.80828	0.34029	0.824	0.35157
0.70488	0.32008	0.80797	0.33816	0.813	0.35698
0.68016	0.28649	0.80319	0.35495	0.8308	0.34763
0.72178	0.3134	0.80162	0.35396	0.81962	0.35799
0.66773	0.32357	0.80066	0.33919	0.82912	0.34365
0.53063	0.28028	0.82306	0.35399	0.82104	0.34644
0.59893	0.2993	0.81266	0.33836	0.81937	0.35842
0.54435	0.3828	0.79924	0.35271	0.81294	0.35555
0.57317	0.32517	0.78996	0.33355	0.82192	0.3503
0.60087	0.31605	0.7918	0.35235	0.82326	0.34794
0.61269	0.32871	0.80654	0.35909	0.81273	0.35916
0.54024	0.36507	0.81114	0.35231	0.81367	0.35116
0.45535	0.3776	0.80742	0.35878	0.80876	0.34891
0.42403	0.34319	0.80243	0.35706	0.81727	0.34935
0.56877	0.33435	0.79753	0.36054	0.8129	0.34986
0.5012	0.30763	0.80058	0.34585	0.79888	0.35946
0.62595	0.38376	0.79637	0.35827	0.82227	0.33906
0.50332	0.33984	0.80189	0.35853	0.80617	0.35894
0.54496	0.3692	0.7965	0.34754	0.80372	0.35657
0.55918	0.3387	0.80344	0.34768	0.79373	0.35439
0.5047	0.36748	0.79898	0.34127	0.79631	0.35979
0.51824	0.35387	0.76701	0.34639	0.80502	0.34988
0.59801	0.38261	0.77267	0.32469	0.81242	0.34625
0.56433	0.41426	0.75379	0.37249	0.81654	0.35121
0.53434	0.36944	0.75142	0.35173	0.80043	0.34991
0.50953	0.41536	0.76392	0.34344	0.79845	0.3561
0.49981	0.40011	0.75433	0.35252	0.80606	0.34429
0.52648	0.33109	0.77138	0.3585	0.81014	0.3479
0.65799	0.30205	0.78999	0.35356	0.8127	0.35499
0.64951	0.3493	0.80236	0.33903	0.82563	0.34164
0.58659	0.37107	0.78418	0.3526	0.81587	0.35178
0.63774	0.37565	0.78845	0.3503	0.80778	0.34789
0.62953	0.37383	0.79406	0.35931	0.81649	0.35447
0.62071	0.35017	0.79776	0.33758	0.81708	0.35147
0.61883	0.3347	0.79141	0.34823	0.82608	0.34716
0.50043	0.371	0.81173	0.34879	0.81933	0.3546
0.522	0.36814	0.79767	0.35926	0.80701	0.35831
0.49635	0.38704	0.79294	0.35352	0.80935	0.35134
0.5625	0.40826	0.79997	0.35	0.81535	0.34946
0.54642	0.34831	0.81078	0.34873	0.81921	0.35418
0.46487	0.3678	0.81351	0.33954	0.81396	0.34066
0.56078	0.3332	0.80723	0.34818	0.8238	0.35181
0.57483	0.40952	0.80718	0.35607	0.81889	0.3543
0.60277	0.38277	0.80152	0.353	0.8085	0.35808
0.56086	0.36248	0.80733	0.34357	0.82385	0.35221
0.51436	0.39283	0.80298	0.36503	0.82286	0.35219
0.60604	0.36731	0.76798	0.36304	0.81572	0.35455
0.62217	0.34878	0.79247	0.36624	0.82479	0.35018
0.62143	0.29723	0.7834	0.36302	0.81684	0.35962
0.59576	0.33748	0.79849	0.35451	0.81573	0.34924
0.50906	0.35376	0.79188	0.35493	0.82212	0.35516
0.55366	0.40342	0.78972	0.36096	0.8166	0.34674
0.51795	0.33364	0.79119	0.36321	0.81433	0.3572
0.50856	0.32397	0.81181	0.33866	0.81448	0.35271
0.54564	0.32998	0.80096	0.362	0.82217	0.35176
0.53819	0.34473	0.78924	0.35897	0.8244	0.35577
0.55336	0.36254	0.79714	0.34875	0.82796	0.35091
0.55105	0.37351	0.7803	0.35903	0.82455	0.3506
0.58979	0.3291	0.7906	0.35322	0.81669	0.35015
0.51586	0.38218	0.80517	0.33922	0.81906	0.36158
0.56331	0.36997	0.80298	0.35662	0.8251	0.35222
0.54054	0.317	0.78609	0.35487	0.82091	0.3534
0.5601	0.34195	0.81126	0.34487	0.82632	0.35029
0.61584	0.36	0.81022	0.35787	0.82335	0.35083
0.52216	0.40616	0.80853	0.36296	0.81996	0.35414
0.50246	0.40144	0.80646	0.3561	0.81425	0.35639
0.53514	0.36021	0.80615	0.3569	0.81786	0.3558
0.54173	0.30287	0.79859	0.3434	0.81994	0.35168
0.55655	0.36929	0.79404	0.35353	0.82002	0.35479
0.59806	0.32976	0.8063	0.35349	0.80347	0.35807
0.58767	0.35191	0.79885	0.36438	0.82021	0.35562
0.54541	0.34536	0.80508	0.35057	0.82607	0.35106
0.62303	0.32142	0.82295	0.34181	0.81919	0.35143
0.62062	0.24568	0.80762	0.36313	0.8247	0.34615
0.60459	0.42869	0.8078	0.36146	0.82246	0.34802
0.63099	0.3811	0.81849	0.35233	0.8229	0.3468
0.67058	0.36157	0.82096	0.3492	0.81152	0.35671
0.67169	0.3837	0.81625	0.3559	0.82181	0.35835
0.60251	0.31206	0.81113	0.35337	0.82128	0.34562
0.60021	0.38744	0.80462	0.35432	0.82217	0.34994
0.59046	0.34112	0.81506	0.34973	0.82104	0.34704
0.70519	0.42105	0.81754	0.34985	0.81976	0.35848
0.68969	0.35457	0.8132	0.35772	0.81948	0.34895
0.68505	0.32933	0.8004	0.35953	0.81909	0.36102
0.70425	0.35271	0.80288	0.34899	0.8304	0.34654
0.70948	0.31098	0.80176	0.35227	0.82281	0.35098
0.61949	0.36665	0.80482	0.33605	0.81577	0.35565
0.57363	0.36244	0.77292	0.35806	0.82269	0.35035
0.56762	0.31556	0.78183	0.3554	0.8146	0.35716
0.60225	0.36465	0.77884	0.35567	0.82037	0.34674
0.65147	0.34336	0.78149	0.35561	0.82484	0.34883
0.66222	0.36931	0.77664	0.36208	0.81166	0.34773
0.60806	0.38438	0.78637	0.36554	0.80056	0.35277
0.64704	0.33985	0.78148	0.36515	0.81373	0.34187
0.67466	0.35971	0.79737	0.33851	0.80638	0.34758
0.66873	0.39465	0.80359	0.35033	0.81294	0.34375
0.65332	0.35951	0.8112	0.34376	0.79972	0.35884
0.62683	0.38137	0.79063	0.35509	0.79483	0.35764
0.6215	0.3892	0.79883	0.35157	0.79489	0.3504
0.64587	0.39878	0.79906	0.34786	0.81359	0.34487
0.67573	0.35427	0.80835	0.3497	0.80918	0.35154
0.63484	0.33457	0.80044	0.35009	0.803	0.36152
0.60783	0.37806	0.80494	0.35157	0.7926	0.35785
0.6848	0.31631	0.81231	0.34377	0.81852	0.33421
0.57207	0.36137	0.80637	0.35405	0.80745	0.34364
0.70245	0.33485	0.77057	0.36578	0.81804	0.34478
0.6129	0.37249	0.81505	0.34449	0.81858	0.3452
0.68602	0.3662	0.79037	0.36286	0.81348	0.35519
0.62089	0.34953	0.81594	0.35836	0.80728	0.35265
0.61892	0.39721	0.80215	0.35132	0.80751	0.35126
0.66693	0.357	0.80411	0.35803	0.81564	0.35327
0.57164	0.36128	0.78687	0.36553	0.80627	0.36027
0.57394	0.35764	0.8074	0.34471	0.80896	0.35801
0.6228	0.39734	0.79623	0.35183	0.81926	0.34673
0.60942	0.39559	0.80671	0.35344	0.82685	0.35397
0.60279	0.37895	0.79309	0.35029	0.81469	0.35503
0.60317	0.32693	0.76275	0.35856	0.81085	0.35229
0.59646	0.34119	0.78936	0.34578	0.81847	0.35076
0.64667	0.37413	0.77206	0.33411	0.81474	0.35651
0.62761	0.38909	0.7699	0.33972	0.80609	0.36317
0.6194	0.44515	0.74168	0.3499	0.81592	0.34509
0.57074	0.37215	0.7783	0.33309	0.81841	0.35601
0.61253	0.42878	0.78125	0.36006	0.82072	0.34851
0.63975	0.33207	0.77578	0.35962	0.81503	0.35047
0.58172	0.42343	0.79295	0.33752	0.82433	0.34781
0.61114	0.3941	0.79025	0.34312	0.82373	0.35176
0.58565	0.33177	0.79308	0.35478	0.81611	0.35435
0.62701	0.37259	0.80241	0.33874	0.81517	0.34923
0.59538	0.38023	0.79618	0.35355	0.81014	0.3568
0.59207	0.39135	0.77992	0.35334	0.82768	0.35139
0.5582	0.3486	0.77818	0.36142	0.82458	0.34751
0.66089	0.33241	0.78219	0.34502	0.81904	0.35401
0.60394	0.4164	0.81093	0.34108	0.81654	0.35039
0.57446	0.41756	0.74962	0.34052	0.81779	0.35421
0.58985	0.37152	0.79968	0.34116	0.82294	0.35588
0.5924	0.35245	0.75882	0.36534	0.82351	0.35273
0.66072	0.3224	0.79016	0.35833	0.82195	0.35067
0.61476	0.37415	0.80654	0.35115	0.81959	0.35175
0.65213	0.32577	0.82648	0.34474	0.81368	0.35149
0.60734	0.38855	0.80135	0.35257	0.82718	0.3421
0.58423	0.40111	0.81646	0.34314	0.8223	0.34989
0.62872	0.37599	0.80413	0.35659	0.82102	0.35357
0.60314	0.39511	0.80614	0.35353	0.82263	0.35187
0.63737	0.35716	0.81294	0.34056	0.82155	0.3452
0.61257	0.36233	0.7988	0.3565	0.81422	0.36097
0.69689	0.3424	0.81229	0.34666	0.82456	0.35126
0.58864	0.43637	0.80153	0.35389	0.81195	0.35772
0.61226	0.37059	0.80853	0.35221	0.81759	0.35005
0.64041	0.43305	0.80831	0.35582	0.81664	0.35273
0.61812	0.37051	0.80863	0.34601	0.81915	0.35552
0.6556	0.37874	0.81499	0.33582	0.81903	0.3471
0.59994	0.40552	0.80579	0.34287	0.82191	0.35194
0.55805	0.35217	0.78126	0.36505	0.81455	0.35054
0.58526	0.37656	0.78335	0.35782	0.8255	0.33772
0.58771	0.35598	0.80042	0.36591	0.82049	0.35141
0.62376	0.38254	0.80042	0.34899	0.81746	0.35049
0.62007	0.34009	0.80384	0.36402	0.82057	0.35047
0.60195	0.37623	0.80903	0.34026	0.82294	0.35687
0.50187	0.37608	0.78957	0.3591	0.81536	0.35414
0.51762	0.35869	0.79893	0.35002	0.82812	0.35149
0.57327	0.3011	0.79255	0.3559	0.81966	0.35136
0.58911	0.37575	0.7936	0.35746	0.81986	0.3505
0.54685	0.35375	0.7959	0.36742	0.80556	0.35954
0.49942	0.38386	0.7916	0.36967	0.81854	0.34728
0.56013	0.42699	0.80683	0.35152	0.81759	0.35807
0.49302	0.36369	0.79765	0.35404	0.82028	0.35154
0.56594	0.30721	0.81361	0.34004	0.81968	0.35473
0.65282	0.29475	0.79397	0.34621	0.80719	0.3589
0.56349	0.3353	0.79982	0.35162	0.81528	0.34391
0.546	0.39609	0.7964	0.362	0.80207	0.35346
0.56782	0.31933	0.79698	0.37048	0.81012	0.3369
0.45828	0.29753	0.80718	0.34651	0.80059	0.35469
0.56218	0.33297	0.79333	0.3611	0.79388	0.34852
0.60745	0.36048	0.78753	0.34351	0.80342	0.35783
0.57432	0.34023	0.77392	0.36548	0.79858	0.35987
0.56315	0.32595	0.78472	0.35411	0.80935	0.3491
0.61601	0.37221	0.80876	0.34292	0.81692	0.34933
0.37155	0.45144	0.77227	0.36774	0.79611	0.34985
0.6886	0.32437	0.78762	0.34532	0.80685	0.34963
0.59456	0.33952	0.78146	0.35709	0.79463	0.35537
0.46728	0.34921	0.80398	0.34975	0.79817	0.36206
0.51538	0.37701	0.79647	0.35681	0.80896	0.35072
0.58657	0.27463	0.81079	0.357	0.81235	0.35172
0.39797	0.40003	0.80195	0.35315	0.80949	0.34557
0.47259	0.33837	0.79896	0.36472	0.81401	0.35271
0.59785	0.38958	0.79993	0.3499	0.81304	0.34864
0.58128	0.35707	0.81174	0.3572	0.81114	0.35647
0.54777	0.45025	0.80892	0.35173	0.81231	0.35438
0.65173	0.30214	0.81235	0.35526	0.81268	0.35071
0.48847	0.31133	0.80452	0.3534	0.81241	0.35126
0.58952	0.34932	0.80688	0.35851	0.8007	0.35819
0.4897	0.41363	0.80618	0.35604	0.81615	0.3407
0.56903	0.32432	0.80881	0.35219	0.81894	0.35448
0.61539	0.27721	0.81762	0.34036	0.82144	0.3576
0.57714	0.35065	0.81143	0.35741	0.81238	0.35123
0.52066	0.30398	0.79833	0.348	0.80428	0.35943
0.52128	0.29306	0.80533	0.35828	0.82216	0.34837
0.56482	0.32091	0.79724	0.3566	0.8107	0.35936
0.47891	0.38786	0.80175	0.35363	0.8126	0.35903
0.59596	0.39148	0.81076	0.34644	0.81765	0.35266
0.67582	0.339	0.81307	0.34863	0.81723	0.34662
0.75211	0.30823	0.78387	0.35383	0.81916	0.34337
0.73273	0.34954	0.77606	0.35643	0.81887	0.35091
0.74183	0.31781	0.79164	0.3618	0.81335	0.36214
0.65416	0.29839	0.79546	0.34078	0.82131	0.34758
0.68553	0.31672	0.81016	0.33214	0.82069	0.35945
0.5178	0.34056	0.78555	0.3471	0.81817	0.35412
0.52947	0.24305	0.78953	0.36044	0.81025	0.3498
0.59372	0.33166	0.80627	0.34966	0.81284	0.35622
0.46458	0.37646	0.80901	0.35339	0.81153	0.35768
0.53266	0.40203	0.80275	0.35088	0.81761	0.35762
0.56068	0.30479	0.80602	0.35117	0.81895	0.35309
0.54221	0.38702	0.80072	0.35103	0.82153	0.34954
0.44439	0.28392	0.78746	0.35153	0.82365	0.35259
0.52589	0.29767	0.81173	0.3475	0.83057	0.35237
0.53782	0.34772	0.81317	0.34151	0.81673	0.35404
0.52933	0.33238	0.79743	0.35455	0.82435	0.35668
0.55363	0.35128	0.79994	0.35183	0.81339	0.35596
0.5735	0.36874	0.81381	0.3381	0.82124	0.35237
0.57163	0.34026	0.81227	0.35634	0.81963	0.35882
0.54165	0.38703	0.80327	0.35661	0.82923	0.35241
0.61336	0.38095	0.81332	0.34441	0.82208	0.35319
0.50045	0.34437	0.8011	0.35728	0.82469	0.34022
0.50907	0.31833	0.7997	0.35947	0.82007	0.34811
0.47362	0.35641	0.81846	0.35332	0.82159	0.34952
0.45561	0.32536	0.80428	0.35432	0.816	0.34948
0.51085	0.34038	0.80029	0.35767	0.82196	0.34515
0.59354	0.32366	0.80538	0.35547	0.82714	0.35764
0.64918	0.31672	0.79793	0.36078	0.82254	0.35296
0.59158	0.2981	0.79867	0.35883	0.81995	0.35248
0.56685	0.37012	0.80108	0.34236	0.81708	0.34683
0.61281	0.37606	0.78906	0.3499	0.82372	0.35196
0.6213	0.3785	0.7901	0.3464	0.82164	0.34119
0.58015	0.37914	0.78603	0.32292	0.81741	0.35297
0.61515	0.32896	0.77138	0.34861	0.8228	0.34416
0.52333	0.35477	0.76474	0.36032	0.81642	0.34831
0.59831	0.3293	0.76247	0.35495	0.81325	0.3548
0.50438	0.35782	0.76582	0.33702	0.81456	0.35268
0.58173	0.33138	0.76631	0.35954	0.81317	0.3507
0.56096	0.36779	0.80667	0.33109	0.81413	0.34973
0.52836	0.33567	0.78481	0.35848	0.82136	0.35015
0.68981	0.3783	0.80553	0.34102	0.82391	0.34692
0.67797	0.29814	0.79885	0.33343	0.81946	0.35125
0.52747	0.34226	0.78765	0.34694	0.81758	0.35657
0.55501	0.36717	0.76983	0.34975	0.81555	0.35124
0.5425	0.26618	0.75554	0.35187	0.8215	0.3466
0.52269	0.38704	0.7685	0.33867	0.80953	0.3597
0.64301	0.39388	0.76441	0.35463	0.80574	0.35842
0.59091	0.41872	0.77562	0.34423	0.81383	0.35316
0.67909	0.41185	0.77357	0.35123	0.80434	0.34932
0.50628	0.35851	0.78592	0.35646	0.81075	0.34921
0.62229	0.33045	0.79674	0.35216	0.80652	0.34714
0.63538	0.32495	0.81377	0.35101	0.80647	0.35059
0.56687	0.34598	0.81402	0.35155	0.78848	0.35428
0.55619	0.36733	0.79716	0.35608	0.80996	0.35208
0.6347	0.27624	0.7986	0.35175	0.80301	0.34982
0.61768	0.30252	0.79712	0.35409	0.80389	0.34731
0.53153	0.33128	0.80645	0.34497	0.80291	0.36204
0.56343	0.30094	0.79658	0.35037	0.7994	0.34641
0.54541	0.32517	0.80244	0.36101	0.79758	0.36076
0.48211	0.35892	0.80772	0.34708	0.81334	0.35255
0.57023	0.35968	0.80284	0.35945	0.80438	0.35173
0.55182	0.34043	0.80804	0.34949	0.81694	0.34602
0.50284	0.35151	0.804	0.35989	0.80795	0.34875
0.58486	0.34443	0.81654	0.35373	0.81519	0.34268
0.5926	0.37499	0.80445	0.36118	0.81301	0.3539
0.58502	0.3994	0.80091	0.35674	0.80723	0.35064
0.60098	0.34053	0.82348	0.34767	0.81408	0.35598
0.56346	0.36786	0.79644	0.35003	0.81166	0.3594
0.53192	0.37293	0.79416	0.33577	0.80086	0.36476
0.57987	0.40875	0.7955	0.36725	0.79013	0.36842
0.55514	0.35579	0.79801	0.36061	0.79384	0.37353
0.55998	0.35814	0.77664	0.35401	0.79941	0.34353
0.66807	0.29151	0.78411	0.36198	0.82296	0.34994
0.6252	0.32602	0.80129	0.35406	0.81953	0.35543
0.60893	0.37528	0.80547	0.35662	0.82637	0.34866
0.60976	0.37577	0.79018	0.35499	0.81879	0.35203
0.60254	0.37055	0.8052	0.35103	0.82647	0.34667
0.55856	0.34628	0.80671	0.3612	0.81512	0.35797
0.5333	0.34629	0.81081	0.36175	0.81704	0.35225
0.50879	0.41061	0.80342	0.35142	0.81879	0.3476
0.6884	0.35466	0.8225	0.33955	0.81684	0.35011
0.60335	0.4051	0.78249	0.35651	0.8182	0.35345
0.63796	0.37764	0.80054	0.35518	0.81223	0.3551
0.73191	0.31342	0.78776	0.35291	0.82557	0.35198
0.63898	0.34939	0.77411	0.36472	0.81892	0.34682
0.54481	0.35351	0.78605	0.3539	0.82335	0.34906
0.65258	0.35194	0.79766	0.35438	0.81652	0.34976
0.68223	0.45251	0.79849	0.36155	0.81747	0.35069
0.65315	0.3599	0.77345	0.35969	0.8175	0.35576
0.65957	0.36651	0.77608	0.35865	0.82792	0.34588
0.59694	0.37241	0.78952	0.34759	0.8176	0.35455
0.72724	0.34821	0.80564	0.3522	0.82037	0.34729
0.64896	0.38344	0.79102	0.36675	0.82204	0.35008
0.64099	0.40906	0.78417	0.3685	0.81781	0.35586
0.64224	0.40101	0.79824	0.36874	0.82216	0.34878
0.60425	0.36093	0.78885	0.34617	0.82936	0.3509
0.65997	0.39465	0.7747	0.36833	0.82198	0.35063
0.57497	0.33073	0.77796	0.36922	0.82473	0.34799
0.62801	0.39678	0.79456	0.35516	0.82428	0.35832
0.60108	0.39361	0.80136	0.37442	0.8281	0.34954
0.68366	0.37365	0.81252	0.35578	0.81133	0.35902
0.72416	0.36464	0.81178	0.34811	0.81688	0.35453
0.70422	0.3664	0.81933	0.35298	0.82253	0.35592
0.69964	0.31468	0.80847	0.35376	0.8188	0.34949
0.69535	0.3559	0.82248	0.34852	0.81402	0.35874
0.63542	0.34053	0.79946	0.36214	0.81966	0.34859
0.65441	0.42279	0.80964	0.34703	0.81332	0.36013
0.614	0.34446	0.80133	0.35645	0.80851	0.3575
0.63633	0.35726	0.81864	0.34846	0.82134	0.35513
0.61267	0.33381	0.7952	0.3578	0.81316	0.36436
0.65509	0.33921	0.80646	0.3449	0.82465	0.3492
0.59151	0.37439	0.81801	0.34922	0.82665	0.34404
0.62436	0.35939	0.79715	0.35905	0.82371	0.34724
0.64062	0.32191	0.80011	0.34999	0.81722	0.3477
0.58189	0.35578	0.8216	0.34401	0.81923	0.34788
0.58281	0.37076	0.80516	0.35753	0.82026	0.35187
0.55551	0.38784	0.80599	0.36624	0.82152	0.35364
0.67862	0.32461	0.79141	0.35818	0.82446	0.34591
0.56393	0.39229	0.79499	0.35842	0.80934	0.35786
0.57485	0.45493	0.79718	0.35795	0.81732	0.35366
0.59355	0.36185	0.80468	0.3559	0.81598	0.34898
0.63348	0.36872	0.79959	0.33931	0.82755	0.35321
0.58699	0.33087	0.77706	0.35412	0.81829	0.35781
0.60335	0.3751	0.81404	0.3438	0.81722	0.35861
0.65076	0.35073	0.7847	0.3663	0.81607	0.34394
0.50702	0.42323	0.80445	0.36226	0.82687	0.34494
0.6465	0.35551	0.8065	0.33827	0.81672	0.34936
0.60264	0.39881	0.79991	0.34255	0.827	0.34183
0.62107	0.38828	0.79772	0.35178	0.81913	0.35734
0.64699	0.3962	0.77812	0.35313	0.80788	0.35391
0.61152	0.38675	0.81193	0.34625	0.80017	0.35298
0.60489	0.34852	0.78703	0.35185	0.79901	0.36076
0.50932	0.32595	0.8103	0.35207	0.79607	0.36343
0.65808	0.29756	0.81191	0.33971	0.80282	0.35701
0.63768	0.33801	0.79084	0.35164	0.81877	0.35377
0.55421	0.36784	0.80648	0.34001	0.81515	0.34413
0.62102	0.37501	0.80333	0.35088	0.8001	0.35053
0.64628	0.34561	0.80207	0.35526	0.80311	0.35753
0.60831	0.33479	0.81065	0.35461	0.79817	0.35661
0.62199	0.37493	0.81364	0.3504	0.7903	0.35372
0.61629	0.36173	0.81026	0.34277	0.80564	0.36078
0.65272	0.38243	0.80188	0.36108	0.79997	0.36074
0.62939	0.33052	0.8114	0.35024	0.7954	0.3537
0.63157	0.39569	0.81943	0.35333	0.8198	0.34528
0.66135	0.34167	0.8161	0.35075	0.80272	0.35383
0.70029	0.32649	0.80587	0.34219	0.80372	0.36184
0.63563	0.37512	0.79605	0.35664	0.80492	0.33991
0.61131	0.39243	0.79043	0.35793	0.80795	0.36053
0.70036	0.3001	0.77632	0.35701	0.8122	0.35183
0.56843	0.3683	0.77696	0.34929	0.81172	0.36334
0.63542	0.36108	0.79018	0.34183	0.81405	0.35489
0.5942	0.36255	0.78063	0.3415	0.81412	0.35093
0.61144	0.32575	0.79044	0.32667	0.79026	0.35527
0.58142	0.37095	0.77471	0.34718	0.80372	0.34732
0.58627	0.3638	0.7877	0.34846	0.79471	0.3404
0.52858	0.38449	0.79405	0.34785	0.81884	0.34955
0.54695	0.38382	0.80179	0.34542	0.80626	0.35274
0.58736	0.40671	0.79727	0.34114	0.8185	0.35398
0.55989	0.38965	0.79015	0.35475	0.83054	0.34168
0.54365	0.38172	0.80974	0.34116	0.81327	0.35322
0.63552	0.38366	0.80637	0.34489	0.81588	0.35781
0.54609	0.38427	0.78912	0.35596	0.81972	0.3605
0.56752	0.36094	0.77436	0.3644	0.81927	0.34793
0.67839	0.33043	0.76649	0.33354	0.82512	0.34883
0.57685	0.36901	0.76357	0.35626	0.81497	0.35014
0.51736	0.31216	0.73591	0.3489	0.81747	0.35908
0.56335	0.36935	0.77397	0.35374	0.81784	0.3529
0.63648	0.38757	0.79012	0.35756	0.81333	0.35496
0.55009	0.25228	0.80929	0.34948	0.81243	0.35511
0.52844	0.34323	0.79615	0.35607	0.81428	0.35587
0.54358	0.38131	0.80748	0.35148	0.81439	0.35483
0.4515	0.42275	0.80857	0.33787	0.8194	0.3498
0.42039	0.31144	0.81871	0.34461	0.8112	0.35335
0.55929	0.34714	0.78273	0.35666	0.81733	0.35047
0.52082	0.33363	0.80192	0.35122	0.81633	0.35485
0.61678	0.36463	0.79154	0.35417	0.81799	0.34787
0.54886	0.30244	0.79575	0.35465	0.80534	0.35945
0.57827	0.34204	0.81138	0.35191	0.81843	0.36017
0.51228	0.39874	0.82229	0.34416	0.82737	0.35026
0.57264	0.38085	0.81873	0.34832	0.81672	0.36117
0.52866	0.41755	0.81985	0.34609	0.81924	0.35628
0.54394	0.40913	0.81564	0.36589	0.82108	0.35802
0.54799	0.38854	0.81643	0.34492	0.81212	0.35025
0.60488	0.38496	0.80377	0.34435	0.81959	0.35054
0.54923	0.36062	0.80814	0.35655	0.82205	0.35148
0.60051	0.34548	0.81191	0.33918	0.81888	0.35558
0.57351	0.33597	0.76831	0.35596	0.8203	0.35331
0.50362	0.40482	0.7618	0.34825	0.82362	0.35144
0.48915	0.37238	0.76551	0.36308	0.8251	0.3477
0.66017	0.37918	0.80106	0.35527	0.8213	0.35141
0.55105	0.36657	0.80236	0.35026	0.81899	0.34278
0.56875	0.41645	0.80891	0.35215	0.82071	0.35096
0.53382	0.38408	0.81217	0.34867	0.82136	0.35266
0.50258	0.42403	0.77969	0.36483	0.81882	0.3457
0.56238	0.31557	0.77139	0.38359	0.81591	0.35609
0.58841	0.28318	0.80593	0.35798	0.82075	0.34828
0.57652	0.37763	0.78712	0.36666	0.81928	0.35561
0.5256	0.429	0.78535	0.36541	0.81481	0.35071
0.5593	0.30652	0.80182	0.36763	0.82084	0.35292
0.6006	0.37433	0.79722	0.36227	0.81619	0.35299
0.71417	0.27802	0.81472	0.35289	0.81057	0.35837
0.72294	0.32126	0.79291	0.36012	0.81325	0.35607
0.67911	0.25664	0.79978	0.36182	0.81886	0.35449
0.65854	0.32985	0.79551	0.36483	0.8113	0.36021
0.58952	0.35808	0.80549	0.35265	0.82591	0.34911
0.55631	0.33699	0.78283	0.34019	0.81727	0.3538
0.49751	0.33419	0.81303	0.35819	0.81692	0.3489
0.58601	0.34399	0.80884	0.36429	0.81999	0.35259
0.46946	0.36444	0.8062	0.34668	0.82364	0.35168
0.51463	0.37631	0.80452	0.35417	0.81879	0.35198
0.51035	0.37122	0.78466	0.37323	0.81356	0.34814
0.53306	0.31821	0.76609	0.35251	0.81496	0.34687
0.45575	0.28436	0.80233	0.35269	0.80534	0.35896
0.57581	0.36384	0.79637	0.35118	0.81208	0.34834
0.56926	0.36961	0.77158	0.34981	0.80968	0.34534
0.54818	0.42113	0.76731	0.36879	0.8104	0.34929
0.58997	0.42646	0.79051	0.36527	0.8036	0.35192
0.56998	0.28741	0.78183	0.34516	0.8071	0.35457
0.56361	0.32896	0.78778	0.36687	0.80679	0.36146
0.52199	0.33253	0.79128	0.359	0.80032	0.35825
0.49784	0.35995	0.79327	0.36244	0.80666	0.35019
0.51753	0.38796	0.79098	0.34825	0.79633	0.35713
0.5787	0.37048	0.78859	0.35919	0.80046	0.35296
0.58987	0.41504	0.79084	0.35554	0.8148	0.35797
0.54907	0.31045	0.79934	0.36178	0.79057	0.35644
0.57496	0.41646	0.80857	0.35524	0.81158	0.3454
0.59682	0.30596	0.81371	0.34802	0.79392	0.36272
0.63263	0.33383	0.80739	0.35662	0.80876	0.35053
0.50054	0.35529	0.80742	0.35536	0.80486	0.34832
0.54762	0.36034	0.8052	0.34963	0.80488	0.36016
0.5576	0.29052	0.80015	0.35863	0.81283	0.34693
0.56922	0.37479	0.795	0.36432	0.80257	0.36173
0.61073	0.35918	0.80466	0.35035	0.81345	0.35389
0.58357	0.36054	0.80549	0.35613	0.81155	0.35599
0.58066	0.37456	0.80314	0.35827	0.81691	0.34584
0.51319	0.39604	0.80048	0.35981	0.80608	0.36053
0.56447	0.39871	0.80594	0.36352	0.8104	0.35436
0.52316	0.38867	0.79333	0.35798	0.82394	0.35476
0.67276	0.33232	0.80278	0.35297	0.80625	0.35569
0.52886	0.34621	0.79342	0.35117	0.80094	0.34492
0.5683	0.39996	0.79456	0.35777	0.81631	0.34524
0.65666	0.36395	0.78784	0.35067	0.81265	0.35249
0.57834	0.3233	0.79538	0.35731	0.81013	0.3549
0.59957	0.33431	0.78652	0.35557	0.81989	0.35831
0.55066	0.35925	0.79831	0.35645	0.8181	0.35099
0.62397	0.41298	0.80507	0.35563	0.82835	0.34783
0.52032	0.33231	0.8132	0.35042	0.81512	0.35862
0.45856	0.34845	0.79283	0.36451	0.83184	0.34973
0.44712	0.35634	0.80256	0.35797	0.82399	0.35253
0.59366	0.30373	0.80507	0.35487	0.82153	0.35457
0.59841	0.31365	0.79698	0.34553	0.8134	0.3593
0.58408	0.44921	0.81171	0.33867	0.81632	0.35552
0.60489	0.36933	0.7927	0.34499	0.81646	0.35852
0.52932	0.34814	0.78069	0.35161	0.81941	0.35742
0.562	0.36554	0.7814	0.36188	0.81887	0.35128
0.55859	0.34236	0.79985	0.35953	0.82151	0.34938
0.50023	0.32023	0.80247	0.356	0.81852	0.35458
0.46318	0.37221	0.80148	0.35556	0.81639	0.36586
0.58244	0.39631	0.79776	0.37186	0.82484	0.34434
0.44775	0.36966	0.79791	0.36168	0.81681	0.35549
0.66253	0.30333	0.80561	0.35742	0.8233	0.35427
0.50896	0.36649	0.80953	0.35654	0.81195	0.35878
0.59301	0.35761	0.806	0.35442	0.82272	0.35062
0.49934	0.30268	0.81124	0.35559	0.81446	0.35575
0.49754	0.32937	0.81097	0.34837	0.82021	0.35722
0.58395	0.332	0.79212	0.34797	0.81417	0.35497
0.47106	0.34291	0.81059	0.35858	0.81717	0.35628
0.61449	0.37257	0.80881	0.35789	0.81845	0.35491
0.64327	0.3236	0.80062	0.34955	0.81712	0.35997
0.58626	0.36285	0.81077	0.34793	0.82226	0.35152
0.65081	0.32042	0.79774	0.36141	0.81629	0.3561
0.56633	0.37501	0.79933	0.35135	0.81051	0.35486
0.71046	0.29409	0.7747	0.35285	0.81337	0.35632
0.68995	0.32003	0.77863	0.35437	0.81925	0.35694
0.60609	0.38857	0.78094	0.35319	0.82449	0.34282
0.68628	0.37524	0.77461	0.35725	0.8194	0.3507
0.63396	0.36162	0.78431	0.36339	0.82311	0.3457
0.68238	0.35207	0.76805	0.36763	0.82565	0.34967
0.59807	0.42375	0.76504	0.36394	0.80912	0.35421
0.56353	0.41139	0.79344	0.35358	0.82083	0.35113
0.6302	0.34662	0.7761	0.35375	0.81104	0.35594
0.63101	0.33551	0.78931	0.34661	0.81907	0.34549
0.63171	0.34226	0.80668	0.34587	0.82283	0.35577
0.58811	0.32829	0.79319	0.35445	0.81289	0.35472
0.57111	0.32168	0.79836	0.33901	0.82056	0.34505
0.62353	0.34138	0.80127	0.35209	0.81227	0.36287
0.59614	0.38062	0.77864	0.34756	0.81626	0.34857
0.61015	0.37608	0.76534	0.34617	0.81308	0.34926
0.58971	0.3727	0.76839	0.35486	0.81041	0.35232
0.67961	0.38001	0.78217	0.34248	0.8119	0.34615
0.62847	0.34109	0.77725	0.35491	0.8205	0.34918
0.62224	0.35568	0.79828	0.34026	0.81383	0.35386
0.64105	0.36366	0.80361	0.35756	0.8098	0.35866
0.69532	0.38467	0.78631	0.33681	0.81562	0.35379
0.65576	0.3672	0.80986	0.35461	0.81207	0.35603
0.57185	0.39651	0.79608	0.35787	0.81254	0.3583
0.61105	0.3441	0.80086	0.35343	0.8023	0.36301
0.5925	0.37168	0.78853	0.34086	0.82678	0.35056
0.66176	0.37265	0.79914	0.3548	0.81356	0.3622
0.61554	0.36805	0.80525	0.34635	0.81194	0.35537
0.66663	0.37863	0.81079	0.35785	0.81797	0.3497
0.67602	0.35065	0.80654	0.35135	0.80368	0.35227
0.67019	0.34443	0.81561	0.35414	0.81303	0.34707
0.72387	0.33924	0.80959	0.34499	0.81467	0.35606
0.66308	0.391	0.82472	0.34619	0.80162	0.36678
0.66089	0.3836	0.81419	0.35598	0.8114	0.35431
0.53325	0.39757	0.8162	0.36028	0.80986	0.3559
0.59126	0.38872	0.80924	0.34945	0.79712	0.35439
0.62466	0.39887	0.80171	0.36108	0.79412	0.36707
0.66619	0.3896	0.79784	0.34819	0.79751	0.35251
0.70714	0.38697	0.78625	0.35157	0.80981	0.36018
0.60421	0.34731	0.79232	0.36868	0.81357	0.33495
0.59753	0.35207	0.76881	0.36091	0.80522	0.34635
0.64869	0.39488	0.79489	0.34753	0.81963	0.34129
0.58681	0.39278	0.78606	0.36206	0.79751	0.35435
0.61557	0.37628	0.79703	0.36532	0.80324	0.34561
0.58519	0.30605	0.78613	0.35315	0.80961	0.34889
0.59374	0.36337	0.81129	0.34808	0.79686	0.35375
0.59001	0.39713	0.7841	0.35134	0.7944	0.35818
0.64169	0.38189	0.79872	0.36024	0.81375	0.35039
0.54456	0.36507	0.81893	0.3538	0.81572	0.35584
0.60322	0.29975	0.80422	0.35264	0.80312	0.36382
0.64859	0.38741	0.80514	0.35279	0.80624	0.35789
0.62693	0.37616	0.79222	0.3507	0.80667	0.35204
0.61464	0.38917	0.80728	0.35469	0.81247	0.34533
0.65094	0.35953	0.79336	0.36039	0.79633	0.34851
0.59525	0.34743	0.78992	0.36881	0.77181	0.3485
0.58605	0.33956	0.80679	0.36406	0.81319	0.35057
0.64109	0.38303	0.79741	0.37025	0.8083	0.35495
0.55922	0.34799	0.81551	0.3498	0.81453	0.35045
0.5542	0.39336	0.81005	0.34703	0.81038	0.35235
0.59724	0.41146	0.79561	0.35051	0.81387	0.35873
0.65	0.32821	0.7878	0.35625	0.81582	0.35036
0.60753	0.30385	0.8015	0.35663	0.80903	0.35632
0.62797	0.37026	0.7913	0.35994	0.82078	0.35869
0.60126	0.34123	0.783	0.36568	0.8186	0.35603
0.57228	0.37225	0.78963	0.36013	0.81873	0.3551
0.59192	0.40724	0.79108	0.35563	0.82619	0.3434
0.57035	0.38059	0.79313	0.34085	0.81712	0.35414
0.58037	0.37514	0.78136	0.35347	0.81963	0.35231
0.62159	0.35274	0.7682	0.35127	0.81478	0.35303
0.68599	0.31347	0.75163	0.3594	0.82196	0.35033
0.64895	0.36748	0.7746	0.34491	0.8158	0.35837
0.60076	0.33076	0.73891	0.35437	0.8173	0.34829
0.5865	0.32658	0.77066	0.35964	0.818	0.3557
0.59247	0.35579	0.77153	0.3392	0.81489	0.34968
0.61032	0.36774	0.79379	0.35443	0.82078	0.34935
0.63101	0.36881	0.78514	0.36843	0.81907	0.34719
0.62817	0.38208	0.78414	0.35517	0.82041	0.34642
0.64534	0.36341	0.79531	0.34702	0.82262	0.35766
0.62244	0.41686	0.79501	0.3515	0.8194	0.35381
0.63554	0.36051	0.81473	0.34966	0.82168	0.3563
0.58392	0.41236	0.80672	0.35334	0.81451	0.35212
0.5752	0.28129	0.78961	0.36107	0.82535	0.35126
0.58578	0.38254	0.80271	0.36235	0.82489	0.34868
0.62098	0.40924	0.80656	0.35085	0.82578	0.34955
0.58452	0.32389	0.81459	0.34826	0.81654	0.35415
0.56045	0.39312	0.80634	0.3554	0.81864	0.35489
0.65042	0.38748	0.79654	0.34978	0.8217	0.35192
0.54029	0.33195	0.81391	0.35415	0.81836	0.351
0.63548	0.38578	0.80518	0.34868	0.81772	0.35144
0.5233	0.4085	0.80901	0.35261	0.82268	0.35639
0.65243	0.29132	0.79501	0.35858	0.80928	0.35487
0.55022	0.33994	0.80152	0.34284	0.82041	0.34691
0.58223	0.34885	0.79929	0.35486	0.82658	0.34918
0.51132	0.39323	0.80406	0.36408	0.81458	0.35525
0.57279	0.35481	0.80637	0.35519	0.81668	0.35691
0.56949	0.3709	0.80608	0.35315	0.81605	0.35531
0.55369	0.37427	0.80315	0.34273	0.81287	0.35379
0.5569	0.38481	0.78499	0.36573	0.80826	0.35086
0.61177	0.30572	0.80074	0.35723	0.82105	0.35397
0.44583	0.3645	0.80461	0.3406	0.8078	0.35408
0.52067	0.364	0.82251	0.34173	0.8339	0.34418
0.57896	0.34725	0.79329	0.35144	0.80948	0.35394
0.49715	0.39755	0.80048	0.3538	0.81004	0.35745
0.56125	0.36568	0.79753	0.35617	0.82463	0.35408
0.58216	0.35522	0.8064	0.34614	0.82418	0.35153
0.55586	0.27069	0.80065	0.34649	0.82111	0.3602
0.52505	0.39846	0.79188	0.34956	0.81352	0.35515
0.43671	0.41865	0.80508	0.34509	0.81819	0.35895
0.47923	0.34264	0.79964	0.34831	0.81191	0.35381
0.44646	0.43776	0.78576	0.35863	0.81586	0.35386
0.50869	0.37913	0.80074	0.35853	0.81642	0.35043
0.4918	0.3788	0.81139	0.3471	0.82157	0.34975
0.53484	0.35711	0.80764	0.35265	0.80745	0.35681
0.58954	0.36646	0.8094	0.34968	0.82191	0.35123
0.45473	0.34305	0.79831	0.36217	0.80531	0.35613
0.42762	0.34203	0.81351	0.35411	0.81057	0.36165
0.5241	0.34803	0.79949	0.35328	0.81747	0.3534
0.53305	0.31951	0.80725	0.36384	0.82391	0.34077
0.46072	0.34668	0.80175	0.35392	0.81085	0.3517
0.48743	0.30657	0.79221	0.35697	0.81528	0.34503
0.6164	0.31931	0.80942	0.35549	0.82465	0.35212
0.52236	0.33082	0.80526	0.35185	0.79193	0.36927
0.63364	0.37119	0.81651	0.35683	0.81427	0.35254
0.53715	0.33312	0.80795	0.35655	0.8013	0.34407
0.51851	0.35812	0.81481	0.34138	0.8016	0.3465
0.53725	0.38964	0.7996	0.36799	0.81679	0.35319
0.51284	0.41903	0.77691	0.3599	0.79676	0.34967
0.57968	0.34879	0.76734	0.34833	0.8002	0.34696
0.54572	0.30901	0.77243	0.33269	0.80689	0.34674
0.66945	0.35172	0.79691	0.35551	0.80292	0.35049
0.64274	0.33212	0.76848	0.32864	0.80771	0.34654
0.55915	0.3369	0.78799	0.35357	0.8092	0.35535
0.57809	0.34686	0.78913	0.35899	0.8151	0.35075
0.58768	0.37413	0.80002	0.34856	0.80147	0.35108
0.58901	0.29467	0.80773	0.35561	0.79017	0.34848
0.59979	0.33656	0.79968	0.34926	0.80722	0.35018
0.51232	0.37985	0.79505	0.35663	0.80992	0.35388
0.55152	0.36742	0.80618	0.35407	0.79547	0.35418
0.47879	0.37042	0.80659	0.35992	0.81059	0.35306
0.48891	0.32945	0.78808	0.3598	0.81533	0.35674
0.60414	0.2963	0.80182	0.35008	0.80626	0.35841
0.48275	0.37169	0.77905	0.34527	0.80434	0.34785
0.43469	0.37372	0.76796	0.36004	0.79991	0.34792
0.56641	0.38373	0.77709	0.3411	0.79142	0.36259
0.56324	0.36963	0.78956	0.36188	0.80343	0.36101
0.50332	0.26841	0.80347	0.35153	0.8193	0.35619
0.5463	0.29812	0.79019	0.35732	0.81438	0.34857
0.53587	0.39075	0.79913	0.35066	0.79856	0.35871
0.56841	0.35847	0.80467	0.35707	0.80877	0.34257
0.54527	0.32032	0.81433	0.35441	0.81067	0.35745
0.54007	0.39089	0.81441	0.35805	0.81573	0.35263
0.4877	0.29016	0.80605	0.34903	0.8196	0.35115
0.46417	0.35483	0.80374	0.35718	0.8181	0.35373
0.42839	0.38767	0.79668	0.36416	0.82234	0.357
0.5831	0.36507	0.7967	0.35506	0.82036	0.35519
0.56184	0.33271	0.80974	0.36117	0.83003	0.34964
0.58013	0.33947	0.80235	0.35489	0.82284	0.34393
0.56566	0.36189	0.81537	0.35411	0.82897	0.34786
0.59382	0.36377	0.79444	0.35916	0.81728	0.35677
0.54732	0.35195	0.81945	0.34747	0.8225	0.35319
0.62167	0.35709	0.81684	0.35642	0.81728	0.35715
0.56341	0.30397	0.81296	0.35011	0.81885	0.35691
0.60557	0.39441	0.80589	0.35902	0.81591	0.36292
0.53629	0.34971	0.78013	0.3613	0.81629	0.353
0.5724	0.40954	0.80683	0.35007	0.82016	0.34983
0.52053	0.31934	0.80384	0.34727	0.81329	0.35961
0.56378	0.32646	0.80276	0.35532	0.81971	0.35379
0.44189	0.404	0.80444	0.35688	0.81356	0.3517
0.54576	0.32371	0.80295	0.35713	0.82271	0.35715
0.60227	0.36594	0.7937	0.34149	0.81928	0.3569
0.45165	0.30594	0.8073	0.34089	0.82509	0.35301
0.57342	0.39342	0.79205	0.37147	0.82113	0.34921
0.56007	0.36649	0.80016	0.36079	0.82021	0.35789
0.58328	0.35774	0.80745	0.35143	0.82145	0.35876
0.58865	0.35443	0.80493	0.35798	0.812	0.35781
0.5074	0.36066	0.80351	0.3607	0.82564	0.35024
0.51341	0.45925	0.80755	0.34414	0.82143	0.3491
0.55795	0.34912	0.79648	0.35999	0.81641	0.35825
0.5594	0.33974	0.80207	0.35404	0.81595	0.34843
0.47069	0.3795	0.79338	0.3599	0.82099	0.35105
0.43313	0.39436	0.79773	0.36368	0.81822	0.35857
0.56015	0.39375	0.80583	0.3514	0.82107	0.3524
0.47563	0.39935	0.80491	0.35972	0.81467	0.3481
0.58457	0.37608	0.81619	0.35061	0.82076	0.35573
0.54333	0.36595	0.79669	0.35397	0.81088	0.35333
0.52778	0.40489	0.8022	0.34368	0.80976	0.35152
0.52098	0.35972	0.79914	0.35857	0.81729	0.34733
0.58976	0.3803	0.7784	0.35862	0.8268	0.34185
0.56949	0.40596	0.78863	0.34848	0.81772	0.35449
0.60501	0.33263	0.78336	0.36378	0.81793	0.35513
0.59266	0.37727	0.79109	0.34454	0.81551	0.35221
0.5793	0.36062	0.78907	0.3442	0.81007	0.35058
0.5721	0.45421	0.75875	0.36278	0.812	0.34899
0.52495	0.40234	0.76194	0.36803	0.8214	0.34806
0.4914	0.37249	0.80664	0.33836	0.8137	0.35098
0.63386	0.33984	0.77556	0.35338	0.81838	0.35289
0.65411	0.33639	0.74648	0.35914	0.81481	0.35578
0.51153	0.39727	0.7303	0.34281	0.82409	0.34729
0.66126	0.38214	0.7649	0.35657	0.81763	0.35582
0.60666	0.35699	0.75494	0.35768	0.81793	0.35929
0.73018	0.35518	0.79691	0.34366	0.80827	0.35695
0.73156	0.3079	0.77469	0.35758	0.81901	0.34834
0.61968	0.34905	0.79477	0.35952	0.81359	0.35298
0.66721	0.39002	0.79884	0.35032	0.81893	0.35225
0.63588	0.34564	0.80302	0.36094	0.81667	0.35139
0.61629	0.32275	0.80301	0.35103	0.82258	0.34833
0.59647	0.38616	0.79865	0.36205	0.81172	0.35898
0.62632	0.37454	0.80335	0.3395	0.80619	0.35211
0.62838	0.36947	0.80609	0.35119	0.81088	0.36104
0.59017	0.39294	0.78915	0.35856	0.81353	0.35158
0.591	0.40851	0.7843	0.35674	0.8145	0.35579
0.55116	0.346	0.7777	0.34773	0.80969	0.36176
0.58432	0.32862	0.79304	0.34753	0.80631	0.35908
0.65505	0.33476	0.79455	0.35501	0.80113	0.34664
0.68064	0.34025	0.79782	0.3505	0.81218	0.34951
0.63544	0.36644	0.81055	0.35089	0.80136	0.35204
0.63627	0.37472	0.81475	0.35462	0.82053	0.33814
0.65924	0.36237	0.7985	0.36275	0.80579	0.34977
0.65276	0.35334	0.8102	0.35943	0.81771	0.33503
0.62369	0.35727	0.80576	0.3572	0.81687	0.34298
0.57988	0.38829	0.79766	0.36054	0.81888	0.34593
0.63288	0.32393	0.79616	0.36154	0.80003	0.35792
0.61277	0.39641	0.79643	0.36214	0.81796	0.34348
0.69615	0.33804	0.81465	0.34833	0.8022	0.36129
0.6725	0.38175	0.80249	0.35187	0.79422	0.35365
0.64968	0.36723	0.78614	0.3561	0.80369	0.36077
0.65962	0.41666	0.80172	0.3538	0.80695	0.35057
0.61933	0.43706	0.79902	0.35131	0.81672	0.35215
0.6056	0.35446	0.79895	0.34976	0.80464	0.35423
0.65973	0.33051	0.79687	0.35296	0.81111	0.35551
0.60884	0.39996	0.78171	0.36608	0.79778	0.35284
0.67987	0.36572	0.79198	0.36096	0.79456	0.35939
0.66293	0.35465	0.79468	0.35958	0.79665	0.34903
0.62836	0.35174	0.79155	0.35525	0.81206	0.3532
0.65318	0.32608	0.80706	0.35116	0.82141	0.35298
0.59431	0.39721	0.80352	0.35489	0.80401	0.35222
0.56144	0.3333	0.81954	0.34276	0.816	0.35011
0.71419	0.37079	0.80768	0.34949	0.82466	0.34617
0.65473	0.38727	0.80841	0.35773	0.80582	0.35329
0.68749	0.36266	0.7962	0.35888	0.81305	0.35685
0.58146	0.35994	0.79748	0.35054	0.80417	0.35977
0.56285	0.39345	0.81186	0.36145	0.81906	0.35125
0.63692	0.38533	0.81761	0.3487	0.81213	0.35475
0.60404	0.37473	0.80292	0.35972	0.81621	0.35735
0.64611	0.37055	0.81027	0.3514	0.81148	0.35417
0.6577	0.36873	0.81117	0.35289	0.81461	0.35919
0.62015	0.39215	0.80759	0.35855	0.81718	0.35206
0.64156	0.34265	0.81665	0.35392	0.81891	0.35469
0.63856	0.38071	0.81585	0.35479	0.81908	0.34531
0.6314	0.32829	0.81907	0.34923	0.81714	0.36219
0.66273	0.38166	0.82098	0.3529	0.81938	0.35672
0.68357	0.36413	0.79975	0.35083	0.81353	0.35589
0.53838	0.36473	0.81125	0.34568	0.81747	0.3526
0.70652	0.34711	0.78904	0.34477	0.82015	0.35159
0.63146	0.37442	0.779	0.32948	0.81658	0.36042
0.61461	0.40405	0.74359	0.38953	0.82819	0.34349
0.67219	0.35704	0.77401	0.35679	0.82217	0.35591
0.55536	0.37105	0.78931	0.35143	0.82189	0.34492
0.64517	0.34229	0.81478	0.34266	0.81743	0.34839
0.63305	0.37127	0.81565	0.35315	0.81659	0.34706
0.51219	0.34119	0.80241	0.35793	0.82916	0.34781
0.60612	0.32053	0.80342	0.3513	0.82169	0.34641
0.53143	0.35241	0.80852	0.34841	0.82698	0.34893
0.64741	0.39316	0.80229	0.35704	0.81815	0.35192
0.55682	0.34566	0.80889	0.347	0.81524	0.34891
0.6405	0.34812	0.79756	0.35801	0.81127	0.35221
0.5919	0.37745	0.78912	0.36675	0.81871	0.35717
0.62087	0.41444	0.78659	0.35782	0.81777	0.35499
0.58425	0.34418	0.80127	0.33954	0.82188	0.35344
0.65222	0.40232	0.79551	0.34859	0.82221	0.34607
0.66516	0.32974	0.80083	0.35233	0.82027	0.35432
0.6321	0.36839	0.80004	0.35437	0.81371	0.35156
0.60668	0.38529	0.79113	0.36084	0.81662	0.35038
0.63418	0.36689	0.80768	0.35454	0.81535	0.35371
0.63245	0.43336	0.80246	0.35629	0.82281	0.35513
0.61075	0.37472	0.81359	0.3495	0.82278	0.34732
0.5807	0.38466	0.80494	0.35368	0.81375	0.35643
0.59894	0.40003	0.80595	0.35943	0.81347	0.35169
0.58854	0.37532	0.81371	0.35984	0.8141	0.35906
0.63346	0.37712	0.80911	0.36352	0.81556	0.3474
0.51226	0.38853	0.79738	0.3568	0.82433	0.3428
0.64401	0.36056	0.81408	0.35746	0.81981	0.35312
0.57119	0.36513	0.82282	0.35682	0.81162	0.36203
0.61078	0.36623	0.81793	0.35239	0.81771	0.34071
0.62877	0.37791	0.81229	0.35264	0.81625	0.36
0.62629	0.35403	0.80912	0.34657	0.82199	0.35035
0.48274	0.34454	0.80791	0.35328	0.81927	0.34531
0.52269	0.33765	0.79308	0.35579	0.81567	0.35625
0.62638	0.31006	0.81153	0.34059	0.82148	0.35121
0.64903	0.36978	0.80312	0.3575	0.81896	0.35152
0.61923	0.38053	0.80943	0.35211	0.80978	0.3556
0.53007	0.37184	0.78896	0.35321	0.82682	0.34892
0.58947	0.36013	0.78996	0.36132	0.82149	0.35154
0.54406	0.31469	0.78809	0.36023	0.81439	0.35088
0.60723	0.34658	0.78708	0.36764	0.81313	0.35701
0.50915	0.28914	0.79937	0.35358	0.82366	0.35212
0.58928	0.38062	0.79858	0.3418	0.81626	0.35211
0.49502	0.40818	0.78362	0.35594	0.80938	0.36003
0.56007	0.34487	0.79254	0.3505	0.80614	0.35146
0.49714	0.43579	0.7994	0.35717	0.8045	0.35018
0.5169	0.39617	0.80921	0.35133	0.80191	0.36058
0.61968	0.37606	0.82283	0.35198	0.80993	0.34303
0.44759	0.36766	0.80878	0.35003	0.80358	0.35297
0.58012	0.34663	0.81245	0.35456	0.80177	0.35867
0.49524	0.37676	0.80793	0.36951	0.7979	0.35006
0.56007	0.36919	0.81468	0.35044	0.80233	0.34959
0.49525	0.34616	0.80955	0.35743	0.80937	0.35416
0.3814	0.36797	0.7984	0.3536	0.79918	0.35494
0.48948	0.4051	0.7893	0.36277	0.79315	0.36868
0.5563	0.34336	0.80962	0.35871	0.8048	0.35303
0.43473	0.2964	0.80322	0.3585	0.80016	0.35884
0.55246	0.39966	0.79422	0.35766	0.81605	0.34706
0.38335	0.32241	0.80215	0.37185	0.80727	0.34676
0.57136	0.38313	0.78824	0.35976	0.80423	0.34949
0.49287	0.35919	0.79891	0.36009	0.80073	0.35471
0.58085	0.28213	0.79986	0.35438	0.81022	0.35663
0.58333	0.31147	0.78232	0.36552	0.80791	0.3597
0.5598	0.32959	0.77538	0.35266	0.81104	0.34821
0.61668	0.34997	0.81203	0.3395	0.81134	0.34669
0.49942	0.38627	0.77351	0.36516	0.79995	0.35486
0.49185	0.38624	0.80094	0.35025	0.80238	0.35599
0.56921	0.36709	0.80194	0.34429	0.79968	0.35655
0.46784	0.38325	0.74905	0.36646	0.78929	0.35336
0.55781	0.38036	0.79527	0.34652	0.78223	0.35317
0.58443	0.29925	0.80274	0.35287	0.80156	0.35284
0.53648	0.30487	0.77213	0.34271	0.82094	0.34821
0.5481	0.26237	0.75047	0.35282	0.81502	0.35166
0.54922	0.35296	0.75522	0.34847	0.80538	0.36232
0.405	0.35964	0.75387	0.32258	0.81422	0.35097
0.57541	0.37192	0.75889	0.35462	0.81972	0.35063
0.4992	0.36579	0.75805	0.34844	0.80843	0.35759
0.48465	0.38729	0.79436	0.36027	0.81723	0.34911
0.53331	0.36391	0.81379	0.34762	0.81146	0.35845
0.47559	0.34166	0.81059	0.36173	0.81883	0.35024
0.51313	0.31054	0.78763	0.36096	0.82164	0.34502
0.64156	0.36713	0.7985	0.35609	0.81201	0.35377
0.44822	0.35201	0.79601	0.35327	0.81788	0.35219
0.5815	0.35214	0.81281	0.36112	0.81077	0.36029
0.58796	0.26442	0.80816	0.35449	0.81481	0.35603
0.57812	0.39656	0.80716	0.34754	0.8189	0.3475
0.51401	0.34866	0.79591	0.35752	0.81778	0.35136
0.50641	0.28651	0.78886	0.34658	0.81706	0.36016
0.6097	0.35333	0.79034	0.34575	0.82625	0.35315
0.60425	0.30128	0.80848	0.3508	0.82589	0.34658
0.5324	0.3672	0.79448	0.34614	0.81965	0.35101
0.47969	0.38454	0.80616	0.35155	0.81335	0.35749
0.52397	0.39708	0.80665	0.35715	0.8192	0.34628
0.48984	0.41961	0.807	0.34841	0.81916	0.35317
0.56441	0.34125	0.80282	0.36441	0.82144	0.34591
0.64399	0.38592	0.81523	0.34783	0.82606	0.34991
0.52284	0.33795	0.81605	0.35913	0.8166	0.35378
0.48274	0.38674	0.79455	0.35537	0.82146	0.35283
0.53212	0.35105	0.80638	0.34662	0.82151	0.35676
0.63875	0.32122	0.80352	0.34859	0.8251	0.34601
0.5368	0.33455	0.79974	0.3502	0.81592	0.35508
0.49836	0.37977	0.78757	0.35659	0.82399	0.35105
0.51281	0.38091	0.80995	0.34691	0.82572	0.35
0.61285	0.34322	0.80805	0.34518	0.82428	0.35387
0.58642	0.34496	0.79494	0.35928	0.82273	0.35198
0.60449	0.36689	0.79622	0.35826	0.81731	0.35138
0.47149	0.33211	0.79775	0.35128	0.82055	0.35118
0.57174	0.29761	0.80035	0.35143	0.82364	0.3501
0.44504	0.31449	0.80299	0.34655	0.81327	0.35903
0.49834	0.27117	0.78577	0.35975	0.82262	0.34761
0.4777	0.30543	0.81449	0.34824	0.81215	0.36415
0.58248	0.38268	0.77796	0.3508	0.80846	0.35465
0.54014	0.39524	0.80688	0.34791	0.82748	0.35078
0.56212	0.35409	0.81481	0.34591	0.80937	0.35904
0.42927	0.39679	0.80351	0.35139	0.82849	0.34695
0.40014	0.45128	0.81029	0.35333	0.81855	0.35653
0.54228	0.38411	0.82576	0.3414	0.81978	0.35531
0.52135	0.31714	0.81366	0.35605	0.8142	0.3515
0.52553	0.34989	0.80764	0.35946	0.82121	0.34638
0.44329	0.42492	0.81243	0.34365	0.8015	0.36197
0.51549	0.33792	0.81335	0.3535	0.82227	0.34526
0.55405	0.38162	0.80744	0.34523	0.82095	0.34747
0.48647	0.36128	0.8092	0.35771	0.82288	0.34971
0.5737	0.30567	0.80646	0.35876	0.81607	0.35015
0.60816	0.36864	0.81193	0.355	0.81576	0.35081
0.58402	0.37692	0.80429	0.35182	0.80984	0.35468
0.51973	0.34913	0.81381	0.34693	0.81505	0.35243
0.61663	0.33858	0.7964	0.34434	0.81478	0.35969
0.55583	0.30352	0.78725	0.37036	0.82122	0.35472
0.62641	0.32297	0.77429	0.35209	0.80659	0.36322
0.56862	0.35629	0.75695	0.33629	0.82117	0.36368
0.51935	0.31965	0.75112	0.34432	0.80879	0.35043
0.66706	0.37905	0.79862	0.3386	0.81524	0.34547
0.68058	0.32601	0.77313	0.35237	0.82339	0.35284
0.62957	0.39895	0.80313	0.35792	0.81948	0.35461
0.54685	0.32549	0.79806	0.34957	0.80855	0.3587
0.51657	0.31079	0.8121	0.35214	0.81394	0.34742
0.49791	0.36392	0.79731	0.3551	0.82067	0.34511
0.62621	0.39677	0.81348	0.35832	0.81521	0.34368
0.52925	0.36599	0.82385	0.34423	0.81373	0.34352
0.65027	0.41217	0.81755	0.34698	0.80576	0.35874
0.57947	0.41633	0.81313	0.34656	0.8134	0.3514
0.74253	0.32357	0.8242	0.35261	0.8029	0.34619
0.72465	0.3495	0.80839	0.35237	0.82226	0.34674
0.6634	0.3294	0.79438	0.35956	0.81865	0.34919
0.60877	0.37888	0.81967	0.34613	0.80433	0.35142
0.61915	0.39134	0.80997	0.34023	0.80447	0.35143
0.6039	0.32673	0.80519	0.35212	0.80842	0.3453
0.60713	0.32106	0.81442	0.34605	0.80916	0.35949
0.5251	0.41784	0.8087	0.35551	0.79652	0.35894
0.66297	0.31594	0.80916	0.355	0.80584	0.35654
0.62114	0.34029	0.81586	0.34854	0.80381	0.35668
0.59438	0.38485	0.82308	0.34334	0.80641	0.35201
0.55714	0.30789	0.80597	0.35927	0.80352	0.34963
0.59409	0.3669	0.81397	0.34739	0.815	0.34226
0.64009	0.39056	0.80718	0.3507	0.8056	0.35214
0.5721	0.38971	0.8212	0.35337	0.81455	0.35847
0.62742	0.38215	0.81875	0.35108	0.80655	0.35389
0.6334	0.37399	0.82049	0.34601	0.80588	0.34338
0.65895	0.35204	0.81739	0.36251	0.79199	0.35886
0.62252	0.37133	0.81156	0.35349	0.79094	0.35361
0.62958	0.37006	0.8194	0.35128	0.80726	0.36229
0.61033	0.40716	0.80987	0.35315	0.78772	0.35413
0.55923	0.36812	0.80086	0.344	0.81817	0.35226
0.60817	0.35544	0.81932	0.34796	0.79926	0.3538
0.61134	0.38611	0.77723	0.35612	0.80368	0.36054
0.6475	0.35072	0.78964	0.34657	0.81554	0.3525
0.65113	0.40407	0.79042	0.34655	0.81426	0.35894
0.67493	0.36997	0.78314	0.33972	0.80314	0.35433
0.61715	0.36447	0.78803	0.36003	0.81703	0.34969
0.65981	0.36876	0.79133	0.353	0.81242	0.35597
0.70736	0.36019	0.80523	0.34347	0.81248	0.35044
0.60757	0.3323	0.79282	0.34833	0.80786	0.35731
0.57886	0.36707	0.75677	0.35223	0.81631	0.35339
0.59552	0.34728	0.79137	0.35906	0.814	0.35846
0.65684	0.35438	0.78896	0.35311	0.81433	0.35001
0.67454	0.35446	0.79519	0.37157	0.81586	0.35047
0.56414	0.41414	0.78718	0.35734	0.80856	0.35584
0.59844	0.38203	0.79671	0.34158	0.81199	0.35433
0.70845	0.34749	0.79439	0.35141	0.81578	0.3497
0.62131	0.39813	0.79714	0.36046	0.8204	0.35313
[truncated: 10,449 more rows]
