# Supplementary material for: Exploring the role of macromolecular crowding and TNFR1 in cell volume control
Source: eLife journal article supplement (doi:10.7554/elife.92719), 2024-09-19
Supplement: fig3-data1 [file Fig3B-i.xlsx]

## Sheet: Sheet1
Time	Normalized Recovery		Normalized Recovery			D	D
s						µm\+(2)	µm\+(2)
	Lamellar		Perinuclear			Lamellar	Perinuclear
-0.2	0.99577	0.05154	0.99195			13.304	7.71929
-0.19	0.99543	0.03456	0.99405			7.85954	13.2822
-0.18	0.99521	0.03282	0.99492			20.7469	10.2088
-0.17	0.99711	0.01422	0.98904			14.3986	10.1209
-0.16	0.99919	0.0249	0.9894			16.2659	10.8711
-0.15	0.99995	0.03	0.99312			14.3363	11.4348
-0.14	0.99015	0.01806	0.99353			7.16262	10.746
-0.13	0.98961	0.01962	0.98839			4.80737	9.72767
-0.12	0.99338	0.02622	0.99037			13.1015	14.1221
-0.11	0.99178	0.02256	0.99635			14.1204	15.4058
-0.1	0.99778	0.02274	1.00006			13.232	11.7464
-0.09	0.9956	0.01536	0.99805			15.2497	16.2337
-0.08	0.99532	0.0246	0.99933			14.2999	9.99034
-0.07	0.99533	0.0144	0.9985			15.7003	18.0979
-0.06	0.99626	0.01746	0.99745			11.2042	12.5572
-0.05	0.99882	0.01986	0.99491			12.0172	9.21334
-0.04	1.0003	0.01704	0.99414			2.93484	12.4786
-0.03	1.00078	0.03018	1.00025			15.5604	6.84117
-0.02	1.00161	0.01674	1.00121			11.8778	12.5051
-0.01	0.73899	0.02478	0.72952			17.7706	15.68
0	0.4177	0.01878	0.3452			12.9604	6.77962
0.01	0.46889	0.01914	0.4136
0.02	0.51153	0.02766	0.46634
0.03	0.54765	0.01926	0.50907
0.04	0.57865	0.0255	0.54471
0.05	0.60559	0.0075	0.57505
0.06	0.62922	0.0096	0.60129
0.07	0.65012	0.01938	0.62423
0.08	0.66874	0.02142	0.64449
0.09	0.68546	0.02406	0.66255
0.1	0.70053	0.01794	0.67874
0.11	0.7142	0.00876	0.69335
0.12	0.72666	0.03204	0.7066
0.13	0.73806	0.0213	0.7187
0.14	0.74854	0.02784	0.72978
0.15	0.75819	0.01632	0.73996
0.16	0.76712	0.033	0.74935
0.17	0.77542	0.01026	0.75805
0.18	0.78312	0.03528	0.76613
0.19	0.79031	0.02154	0.77366
0.2	0.79702	0.01842	0.78068
0.21	0.80333	0.01422	0.78725
0.22	0.80923	0.01392	0.79342
0.23	0.81479	0.01656	0.7992
0.24	0.82003	0.03678	0.80466
0.25	0.82498	0.02886	0.8098
0.26	0.82966	0.01734	0.81466
0.27	0.83409	0.01542	0.81926
0.28	0.83829	0.01752	0.82362
0.29	0.84229	0.01626	0.82776
0.3	0.84608	0.02166	0.83169
0.31	0.84969	0.01614	0.83543
0.32	0.85314	0.02016	0.839
0.33	0.85642	0.02316	0.8424
0.34	0.85957	0.03132	0.84565
0.35	0.86257	0.00858	0.84876
0.36	0.86545	0.01074	0.85173
0.37	0.86821	0.0258	0.85457
0.38	0.87085	0.01266	0.85731
0.39	0.87339	0.02772	0.85992
0.4	0.87582	0.0216	0.86244
0.41	0.87817	0.02226	0.86486
0.42	0.88043	0.02436	0.86719
0.43	0.88259	0.0153	0.86943
0.44	0.88468	0.01632	0.87158
0.45	0.88671	0.01062	0.87367
0.46	0.88865	0.03282	0.87567
0.47	0.89054	0.00708	0.8776
0.48	0.89234	0.01548	0.87948
0.49	0.8941	0.02274	0.88129
0.5	0.8958	0.01716	0.88303
0.51	0.89744	0.03654	0.88473
0.52	0.89904	0.01662	0.88636
0.53	0.90057	0.01608	0.88796
0.54	0.90207	0.0207	0.88949
0.55	0.90351	0.02124	0.89098
0.56	0.90492	0.03684	0.89243
0.57	0.90628	0.00882	0.89382
0.58	0.9076	0.02214	0.89519
0.59	0.90889	0.01074	0.89652
0.6	0.91014	0.03066	0.8978
0.61	0.91136	0.01788	0.89905
0.62	0.91254	0.01662	0.90026
0.63	0.91369	0.01536	0.90145
0.64	0.9148	0.01458	0.9026
0.65	0.9159	0.0201	0.90373
0.66	0.91696	0.03744	0.90481
0.67	0.91799	0.01656	0.90588
0.68	0.919	0.02778	0.90691
0.69	0.91998	0.01626	0.90792
0.7	0.92094	0.00684	0.9089
0.71	0.92187	0.02148	0.90987
0.72	0.92279	0.01086	0.9108
0.73	0.92368	0.01716	0.91173
0.74	0.92455	0.01602	0.91262
0.75	0.92539	0.02454	0.91348
0.76	0.92623	0.01956	0.91434
0.77	0.92704	0.01746	0.91518
0.78	0.92783	0.00918	0.91599
0.79	0.92861	0.0264	0.91679
0.8	0.92937	0.02154	0.91757
0.81	0.93011	0.02376	0.91833
0.82	0.93083	0.01914	0.91908
0.83	0.93154	0.01518	0.9198
0.84	0.93224	0.02106	0.92052
0.85	0.93292	0.02244	0.92122
0.86	0.93359	0.02406	0.9219
0.87	0.93425	0.02928	0.92257
0.88	0.93488	0.006	0.92323
0.89	0.93551	0.02094	0.92388
0.9	0.93613	0.01806	0.92451
0.91	0.93673	0.01242	0.92513
0.92	0.93732	0.02076	0.92574
0.93	0.9379	0.0159	0.92633
0.94	0.93847	0.0294	0.92691
0.95	0.93903	0.02406	0.92748
0.96	0.93957	0.04344	0.92804
0.97	0.94011	0.0366	0.9286
0.98	0.94063	0.0243	0.92914
0.99	0.94116	0.03222	0.92967
1	0.94166	0.02742	0.9302
1.01	0.94217	0.01518	0.93071
1.02	0.94266	0.02226	0.93121
1.03	0.94314	0.0294	0.93171
1.04	0.94361	0.02706	0.9322
1.05	0.94408	0.01692	0.93267
1.06	0.94453	0.0303	0.93314
1.07	0.94499	0.01602	0.9336
1.08	0.94543	0.01074	0.93405
1.09	0.94586	0.03264	0.93451
1.1	0.94629	0.0183	0.93495
1.11	0.94671	0.03306	0.93537
1.12	0.94712	0.03396	0.9358
1.13	0.94753	0.02856	0.93622
1.14	0.94793	0.01524	0.93663
1.15	0.94833	0.03246	0.93703
1.16	0.94871	0.0165	0.93744
1.17	0.94909	0.0258	0.93782
1.18	0.94947	0.01326	0.93821
1.19	0.94985	0.02688	0.93859
1.2	0.95021	0.021	0.93897
1.21	0.95057	0.01956	0.93934
1.22	0.95092	0.03696	0.9397
1.23	0.95127	0.02016	0.94005
1.24	0.95161	0.01686	0.94041
1.25	0.95195	0.01404	0.94076
1.26	0.95229	0.0285	0.9411
1.27	0.95261	0.04146	0.94144
1.28	0.95293	0.0339	0.94177
1.29	0.95326	0.02262	0.9421
1.3	0.95357	0.01956	0.94242
1.31	0.95388	0.01788	0.94274
1.32	0.95419	0.01512	0.94305
1.33	0.95449	0.0114	0.94336
1.34	0.95479	0.01302	0.94367
1.35	0.95508	0.02178	0.94397
1.36	0.95537	0.02766	0.94426
1.37	0.95566	0.02322	0.94456
1.38	0.95594	0.0093	0.94485
1.39	0.95621	0.03258	0.94513
1.4	0.95649	0.01368	0.94542
1.41	0.95676	0.04884	0.94569
1.42	0.95702	0.03114	0.94597
1.43	0.95729	0.02274	0.94624
1.44	0.95755	0.02598	0.94651
1.45	0.95781	0.01062	0.94677
1.46	0.95806	0.01404	0.94703
1.47	0.95832	0.02586	0.94729
1.48	0.95856	0.02394	0.94754
1.49	0.95881	0.01974	0.94779
1.5	0.95905	0.01284	0.94803
1.51	0.95928	0.01512	0.94829
1.52	0.95952	0.01098	0.94853
1.53	0.95975	0.0309	0.94876
1.54	0.95998	0.03426	0.949
1.55	0.96021	0.02682	0.94923
1.56	0.96043	0.02136	0.94946
1.57	0.96066	0.0126	0.94969
1.58	0.96088	0.02112	0.94991
1.59	0.96108	0.03558	0.95013
1.6	0.9613	0.02454	0.95035
1.61	0.96151	0.01692	0.95057
1.62	0.96172	0.01092	0.95078
1.63	0.96193	0.02958	0.951
1.64	0.96213	0.04308	0.95121
1.65	0.96233	0.009	0.95142
1.66	0.96254	0.02748	0.95162
1.67	0.96274	0.01818	0.95182
1.68	0.96292	0.0153	0.95202
1.69	0.96312	0.02844	0.95222
1.7	0.96332	0.01728	0.95242
1.71	0.9635	0.04356	0.9526
1.72	0.96369	0.02094	0.9528
1.73	0.96387	0.02412	0.95299
1.74	0.96405	0.01512	0.95318
1.75	0.96423	0.00579	0.95336
1.76	0.96441	0.00792	0.95354
1.77	0.96458	0.01014	0.95373
1.78	0.96476	0.04188	0.9539
1.79	0.96493	0.01728	0.95408
1.8	0.96511	0.01386	0.95425
1.81	0.96527	0.0228	0.95443
1.82	0.96545	0.01788	0.9546
1.83	0.96561	0.03666	0.95477
1.84	0.96578	0.00618	0.95495
1.85	0.96594	0.02466	0.95511
1.86	0.96609	0.02028	0.95527
1.87	0.96626	0.00948	0.95544
1.88	0.96641	0.01308	0.95559
1.89	0.96658	0.01764	0.95576
1.9	0.96673	0.04092	0.95592
1.91	0.96688	0.02088	0.95608
1.92	0.96704	0.0207	0.95623
1.93	0.96718	0.02214	0.95638
1.94	0.96733	0.01512	0.95654
1.95	0.96747	0.0126	0.95669
1.96	0.96763	0.01056	0.95684
1.97	0.96777	0.01134	0.95699
1.98	0.96791	0.02238	0.95713
1.99	0.96805	0.0255	0.95727
2	0.96819	0.01674	0.95742
2.01	0.96833	0.02058	0.95756
2.02	0.96847	0.01836	0.9577
2.03	0.9686	0.0231	0.95785
2.04	0.96874	0.02334	0.95798
2.05	0.96887	0.0138	0.95812
2.06	0.969	0.01956	0.95825
2.07	0.96914	0.00726	0.9584
2.08	0.96927	0.03234	0.95853
2.09	0.9694	0.01872	0.95866
2.1	0.96953	0.01722	0.95879
2.11	0.96965	0.00996	0.95892
2.12	0.96978	0.03432	0.95904
2.13	0.9699	0.0312	0.95918
2.14	0.97002	0.02196	0.9593
2.15	0.97014	0.04902	0.95943
2.16	0.97026	0.02136	0.95955
2.17	0.97038	0.01614	0.95967
2.18	0.9705	0.01686	0.95979
2.19	0.97062	0.01536	0.95991
2.2	0.97074	0.0165	0.96003
2.21	0.97085	0.02532	0.96015
2.22	0.97097	0.01278	0.96027
2.23	0.97108	0.01284	0.9604
2.24	0.9712	0.02292	0.96051
2.25	0.97131	0.01704	0.96063
2.26	0.97142	0.02142	0.96074
2.27	0.97153	0.02442	0.96085
2.28	0.97164	0.02094	0.96096
2.29	0.97175	0.03816	0.96108
2.3	0.97186	0.03546	0.96119
2.31	0.97197	0.01974	0.9613
2.32	0.97207	0.04536	0.9614
2.33	0.97218	0.0129	0.96151
2.34	0.97228	0.02334	0.96162
2.35	0.97239	0.02712	0.96173
2.36	0.97248	0.02826	0.96182
2.37	0.97258	0.01854	0.96193
2.38	0.97269	0.01476	0.96203
2.39	0.97279	0.03276	0.96213
2.4	0.97289	0.01146	0.96224
2.41	0.97299	0.01512	0.96234
2.42	0.97309	0.01068	0.96244
2.43	0.97317	0.0207	0.96254
2.44	0.97327	0.03366	0.96264
2.45	0.97337	0.00744	0.96274
2.46	0.97347	0.0195	0.96282
2.47	0.97356	0.0285	0.96292
2.48	0.97365	0.02256	0.96302
2.49	0.97374	0.02808	0.96312
2.5	0.97383	0.02508	0.96321
2.51	0.97393	0.0219	0.96331
2.52	0.97402	0.0114	0.9634
2.53	0.9741	0.02226	0.96348
2.54	0.97419	0.02298	0.96358
2.55	0.97428	0.0258	0.96367
2.56	0.97437	0.01782	0.96376
2.57	0.97445	0.02592	0.96385
2.58	0.97454	0.02394	0.96393
2.59	0.97463	0.01638	0.96402
2.6	0.97472	0.01404	0.96411
2.61	0.9748	0.01584	0.9642
2.62	0.97488	0.02382	0.96429
2.63	0.97497	0.01584	0.96437
2.64	0.97504	0.01044	0.96445
2.65	0.97513	0.00816	0.96454
2.66	0.97521	0.01824	0.96462
2.67	0.9753	0.01782	0.9647
2.68	0.97537	0.02604	0.96478
2.69	0.97545	0.04176	0.96487
2.7	0.97553	0.0306	0.96495
2.71	0.97561	0.01596	0.96503
2.72	0.97569	0.01902	0.96511
2.73	0.97577	0.02406	0.96519
2.74	0.97584	0.01062	0.96526
2.75	0.97592	0.02586	0.96534
2.76	0.976	0.0174	0.96542
2.77	0.97607	0.01158	0.96549
2.78	0.97614	0.0141	0.96557
2.79	0.97621	0.01932	0.96565
2.8	0.97629	0.01236	0.96573
2.81	0.97637	1.7453	0.9658
2.82	0.97643	2.24866	0.96588
2.83	0.97651	1.62156	0.96596
2.84	0.97658	1.58549	0.96602
2.85	0.97665	1.08001	0.9661
2.86	0.97672	0.95491	0.96618
2.87	0.97679	0.80912	0.96624
2.88	0.97686	0.93089	0.96632
2.89	0.97694	0.91934	0.96638
2.9	0.977	0.96895	0.96645
2.91	0.97707	0.7958	0.96653
2.92	0.97713	0.75829	0.96659
2.93	0.9772	0.74584	0.96667
2.94	0.97728	0.92853	0.96674
2.95	0.97734	0.44406	0.9668
2.96	0.97741	0.5819	0.96687
2.97	0.97747	0.29394	0.96693
2.98	0.97754	0.69071	0.967
2.99	0.9776	0.15319	0.96707
3	0.97766	0.36826	0.96713
3.01	0.97772	0.46509	0.9672
3.02	0.97779	0.53973	0.96726
3.03	0.97786	0.52156	0.96733
3.04	0.97792	0.53359	0.9674
3.05	0.97798	0.13506	0.96746
3.06	0.97804	0.70275	0.96753
3.07	0.97811	0.65913	0.96759
3.08	0.97816	0.64019	0.96765
3.09	0.97823	1.01571	0.96771
3.1	0.97828	0.58754	0.96778
3.11	0.97835	0.74285	0.96784
3.12	0.9784	0.27369	0.9679
3.13	0.97847	0.41632	0.96796
3.14	0.97852	0.28607	0.96802
3.15	0.97859	0.60758	0.96808
3.16	0.97864	0.57008	0.96814
3.17	0.9787	0.35181	0.9682
3.18	0.97875	0.54547	0.96826
3.19	0.97882	0.688	0.96832
3.2	0.97887	0.83176	0.96837
3.21	0.97893	0.41214	0.96844
3.22	0.97898	0.50282	0.96849
3.23	0.97904	0.03256	0.96855
3.24	0.97909	0.03543	0.9686
3.25	0.97915	0.06224	0.96866
3.26	0.9792	0.05936	0.96871
3.27	0.97926	0.07809	0.96878
3.28	0.97931	0.04969	0.96884
3.29	0.97937	0.03531	0.96889
3.3	0.97942	0.04437	0.96895
3.31	0.97947	0.05373	0.969
3.32	0.97953	0.0273	0.96905
3.33	0.97958	0.05154	0.9691
3.34	0.97964	0.03456	0.96915
3.35	0.97968	0.03282	0.96921
3.36	0.97974	0.01422	0.96926
3.37	0.97979	0.0249	0.96932
3.38	0.97984	0.03	0.96937
3.39	0.97989	0.01806	0.96942
3.4	0.97995	0.01962	0.96947
3.41	0.97999	0.02622	0.96953
3.42	0.98004	0.02256	0.96957
3.43	0.98009	0.02274	0.96963
3.44	0.98014	0.01536	0.96968
3.45	0.98019	0.0246	0.96973
3.46	0.98024	0.0144	0.96978
3.47	0.98028	0.01746	0.96982
3.48	0.98034	0.01986	0.96988
3.49	0.98038	0.01704	0.96992
3.5	0.98044	0.03018	0.96998
3.51	0.98048	0.01674	0.97002
3.52	0.98053	0.02478	0.97008
3.53	0.98058	0.01878	0.97012
3.54	0.98062	0.01914	0.97018
3.55	0.98067	0.02766	0.97022
3.56	0.98071	0.01926	0.97026
3.57	0.98077	0.0255	0.97031
3.58	0.98081	0.0075	0.97036
3.59	0.98085	0.0096	0.97041
3.6	0.9809	0.01938	0.97045
3.61	0.98094	0.02142	0.97049
3.62	0.98098	0.02406	0.97055
3.63	0.98103	0.01794	0.97059
3.64	0.98107	0.00876	0.97064
3.65	0.98112	0.03204	0.97068
3.66	0.98116	0.0213	0.97073
3.67	0.9812	0.02784	0.97077
3.68	0.98125	0.01632	0.97081
3.69	0.98129	0.033	0.97086
3.7	0.98133	0.01026	0.9709
3.71	0.98138	0.03528	0.97095
3.72	0.98142	0.02154	0.97099
3.73	0.98147	0.01842	0.97103
3.74	0.98151	0.01422	0.97108
3.75	0.98155	0.01392	0.97112
3.76	0.98159	0.01656	0.97116
3.77	0.98163	0.03678	0.97121
3.78	0.98167	0.02886	0.97125
3.79	0.98172	0.05158	0.97129
3.8	0.98175	0.05752	0.97133
3.81	0.98179	0.04376	0.97137
3.82	0.98184	0.05141	0.97142
3.83	0.98187	0.03633	0.97146
3.84	0.98191	0.02474	0.97149
3.85	0.98196	0.02017	0.97154
3.86	0.98199	0.02292	0.97158
3.87	0.98204	0.02045	0.97162
3.88	0.98208	0.0234	0.97166
3.89	0.98211	0.01522	0.9717
3.9	0.98216	0.02707	0.97174
3.91	0.98219	0.01655	0.97178
3.92	0.98223	0.02496	0.97181
3.93	0.98226	0.00515	0.97186
3.94	0.98231	0.01438	0.9719
3.95	0.98234	0.00969	0.97193
3.96	0.98239	0.01722	0.97198
3.97	0.98242	0.00579	0.97201
3.98	0.98245	0.01197	0.97205
3.99	0.98249	0.01044	0.97209
4	0.98253	0.01326	0.97212
4.01	0.98256	0.0142	0.97216
4.02	0.9826	0.01908	0.9722
4.03	0.98264	0.00447	0.97224
4.04	0.98267	0.01554	0.97227
4.05	0.98271	0.01423	0.97231
4.06	0.98275	0.01536	0.97235
4.07	0.98278	0.03005	0.97238
4.08	0.98282	0.01326	0.97242
4.09	0.98286	0.0183	0.97246
4.1	0.98289	0.01466	0.97249
4.11	0.98292	0.01008	0.97253
4.12	0.98295	0.01238	0.97257
4.13	0.983	0.01055	0.9726
4.14	0.98303	0.01599	0.97264
4.15	0.98306	0.00746	0.97267
4.16	0.9831	0.01243	0.9727
4.17	0.98313	0.01626	0.97275
4.18	0.98316	0.02156	0.97278
4.19	0.98319	0.01437	0.97281
4.2	0.98323	0.00964	0.97285
4.21	0.98326	0.01467	0.97288
4.22	0.98329	0.01915	0.97291
4.23	0.98333	0.02638	0.97295
4.24	0.98336	0.02282	0.97298
4.25	0.98339	0.03251	0.97301
4.26	0.98342	0.01874	0.97304
4.27	0.98346	0.01585	0.97309
4.28	0.98349	0.01636	0.97312
4.29	0.98352	0.01877	0.97315
4.3	0.98356	0.00902	0.97319
4.31	0.98359	0.01596	0.97322
4.32	0.98362	0.02016	0.97324
4.33	0.98365	0.01778	0.97327
4.34	0.98369	0.01135	0.97331
4.35	0.98372	0.02255	0.97334
4.36	0.98374	0.01582	0.97337
4.37	0.98377	0.01649	0.97341
4.38	0.98381	0.01998	0.97344
4.39	0.98384	0.01954	0.97347
4.4	0.98387	0.01424	0.97351
4.41	0.98391	0.01306	0.97354
4.42	0.98393	0.01585	0.97356
4.43	0.98396	0.02124	0.97359
4.44	0.98399	0.0189	0.97363
4.45	0.98403	0.02207	0.97366
4.46	0.98405	0.01872	0.97369
4.47	0.98408	0.00776	0.97371
4.48	0.98411	0.00896	0.97375
4.49	0.98414	0.02385	0.97378
4.5	0.98417	0.02065	0.97381
4.51	0.9842	0.01871	0.97384
4.52	0.98422	0.00859	0.97387
4.53	0.98426	0.00732	0.9739
4.54	0.98429	0.02857	0.97392
4.55	0.98431	0.01818	0.97396
4.56	0.98434	0.01881	0.97399
4.57	0.98438	0.01414	0.97401
4.58	0.9844	0.01953	0.97404
4.59	0.98443	0.00566	0.97408
4.6	0.98445	0.02198	0.9741
4.61	0.98449	0.00995	0.97413
4.62	0.98451	0.01127	0.97416
4.63	0.98454	0.01733	0.97419
4.64	0.98456	0.01078	0.97422
4.65	0.9846	0.02623	0.97424
4.66	0.98462	0.02495	0.97427
4.67	0.98465	0.01182	0.9743
4.68	0.98467	0.02349	0.97433
4.69	0.9847	0.01019	0.97435
4.7	0.98473	0.02515	0.97438
4.71	0.98476	0.01999	0.97441
4.72	0.98478	0.02408	0.97444
4.73	0.98481	0.00957	0.97446
4.74	0.98484	0.01394	0.97449
4.75	0.98487	0.01325	0.97452
4.76	0.98489	0.00807	0.97455
4.77	0.98491	0.01827	0.97457
4.78	0.98495	0.01412	0.9746
4.79	0.98497	0.01492	0.97463
4.8	0.98499	0.00958	0.97466
4.81	0.98502	0.0197	0.97468
4.82	0.98504	0.02333	0.9747
4.83	0.98507	0.02504	0.97474
4.84	0.9851	0.01359	0.97476
4.85	0.98512	0.0218	0.97478
4.86	0.98514	0.00479	0.97481
4.87	0.98518	0.02128	0.97484
4.88	0.9852	0.01316	0.97486
4.89	0.98522	0.02368	0.97489
4.9	0.98525	0.01884	0.97491
4.91	0.98527	0.01267	0.97493
4.92	0.9853	0.01522	0.97497
4.93	0.98532	0.01922	0.97499
4.94	0.98535	0.02383	0.97501
4.95	0.98537	0.0138	0.97504
4.96	0.98539	0.01678	0.97507
4.97	0.98542	0.0208	0.97509
4.98	0.98544	0.01767	0.97511
4.99	0.98547	0.00831	0.97514
5	0.98549	0.01763	0.97516
5.01	0.98551	0.02265	0.97519
5.02	0.98554	0.01627	0.97521
5.03	0.98556	0.01175	0.97523
5.04	0.98558	0.02213	0.97526
5.05	0.98561	0.01603	0.97529
5.06	0.98563	0.00901	0.97531
5.07	0.98566	0.02733	0.97533
5.08	0.98568	0.0209	0.97535
5.09	0.9857	0.01294	0.97537
5.1	0.98572	0.0301	0.97541
5.11	0.98574	0.01828	0.97543
5.12	0.98577	0.01935	0.97545
5.13	0.98579	0.01493	0.97547
5.14	0.98581	0.0134	0.97549
5.15	0.98583	0.02635	0.97552
5.16	0.98586	0.0205	0.97554
5.17	0.98589	0.0117	0.97556
5.18	0.98591	0.02214	0.97558
5.19	0.98593	0.01594	0.97562
5.2	0.98595	0.01965	0.97564
5.21	0.98597	0.01868	0.97566
5.22	0.986	0.01321	0.97568
5.23	0.98602	0.02003	0.9757
5.24	0.98604	0.01537	0.97573
5.25	0.98606	0.01742	0.97575
5.26	0.98608	0.02219	0.97577
5.27	0.98611	0.02818	0.97579
5.28	0.98613	0.0173	0.97581
5.29	0.98614	0.0108	0.97584
5.3	0.98616	0.01447	0.97586
5.31	0.98618	0.0209	0.97588
5.32	0.9862	0.01819	0.9759
5.33	0.98623	0.01889	0.97592
5.34	0.98625	0.0184	0.97595
5.35	0.98627	0.0235	0.97597
5.36	0.98629	0.01525	0.97599
5.37	0.98631	0.01888	0.976
5.38	0.98633	0.0227	0.97602
5.39	0.98636	0.02204	0.97604
5.4	0.98638	0.00627	0.97607
5.41	0.98639	0.02247	0.97609
5.42	0.98641	0.02323	0.97611
5.43	0.98643	0.00882	0.97613
5.44	0.98646	0.01182	0.97615
5.45	0.98648	0.01005	0.97618
5.46	0.9865	0.01792	0.9762
5.47	0.98651	0.01964	0.97621
5.48	0.98653	0.01197	0.97623
5.49	0.98655	0.0175	0.97625
5.5	0.98658	0.01087	0.97627
5.51	0.9866	0.01608	0.9763
5.52	0.98662	0.02049	0.97632
5.53	0.98663	0.02145	0.97634
5.54	0.98665	0.01455	0.97635
5.55	0.98667	0.01963	0.97637
5.56	0.9867	0.00867	0.9764
5.57	0.98671	0.01598	0.97642
5.58	0.98673	0.00783	0.97644
5.59	0.98675	0.00797	0.97645
5.6	0.98677	0.0158	0.97647
5.61	0.98678	0.01671	0.97649
5.62	0.98681	0.01955	0.97652
5.63	0.98683	0.01029	0.97653
5.64	0.98685	0.01422	0.97655
5.65	0.98686	0.02622	0.97657
5.66	0.98688	0.01287	0.97659
5.67	0.9869	0.01803	0.9766
5.68	0.98691	0.02426	0.97663
5.69	0.98694	0.01086	0.97665
5.7	0.98696	0.01539	0.97667
5.71	0.98697	0.01666	0.97668
5.72	0.98699	0.02206	0.9767
5.73	0.98701	0.01827	0.97673
5.74	0.98702	0.02579	0.97674
5.75	0.98705	0.02511	0.97676
5.76	0.98707	0.01224	0.97678
5.77	0.98708	0.01414	0.9768
5.78	0.9871	0.01616	0.97681
5.79	0.98712	0.01803	0.97684
5.8	0.98713	0.01658	0.97686
5.81	0.98716	0.01481	0.97687
5.82	0.98718	0.01226	0.97689
5.83	0.98719	0.01484	0.97691
5.84	0.98721	0.01566	0.97692
5.85	0.98722	0.01204	0.97695
5.86	0.98724	0.01959	0.97696
5.87	0.98726	0.01569	0.97698
5.88	0.98728	0.01403	0.977
5.89	0.9873	0.01112	0.97701
5.9	0.98731	0.00733	0.97703
5.91	0.98733	0.01826	0.97705
5.92	0.98734	0.011	0.97707
5.93	0.98736	0.01177	0.97709
5.94	0.98739	0.00298	0.9771
5.95	0.9874	0.00833	0.97712
5.96	0.98742	0.01753	0.97713
5.97	0.98743	0.01016	0.97715
5.98	0.98745	0.02524	0.97718
5.99	0.98746	0.02156	0.97719
6	0.98748	0.01465	0.97721
6.01	0.98749	0.0125	0.97722
6.02	0.98752	0.01264	0.97724
6.03	0.98753	0.01832	0.97725
6.04	0.98755	0.00881	0.97727
6.05	0.98756	0.01138	0.97729
6.06	0.98758	0.02087	0.97731
6.07	0.98759	0.01577	0.97732
6.08	0.98761	0.01707	0.97734
6.09	0.98763	0.02243	0.97735
6.1	0.98765	0.01019	0.97737
6.11	0.98766	0.02613	0.9774
6.12	0.98768	0.02845	0.97741
6.13	0.98769	0.02974	0.97742
6.14	0.98771	0.00871	0.97744
6.15	0.98772	0.01352	0.97745
6.16	0.98775	0.01814	0.97747
6.17	0.98776	0.02281	0.97748
6.18	0.98777	0.0217	0.97751
6.19	0.98779	0.01288	0.97752
6.2	0.9878	0.01167	0.97754
6.21	0.98782	0.02702	0.97755
6.22	0.98783	0.02156	0.97757
6.23	0.98786	0.02808	0.97758
6.24	0.98787	0.02577	0.9776
6.25	0.98788	0.0182	0.97762
6.26	0.9879	0.01803	0.97763
6.27	0.98791	0.02626	0.97765
6.28	0.98793	0.01119	0.97766
6.29	0.98794	0.01377	0.97768
6.3	0.98795	0.02321	0.97769
6.31	0.98798	0.01784	0.97771
6.32	0.98799	0.02225	0.97773
6.33	0.98801	0.01387	0.97774
6.34	0.98802	0.01506	0.97776
6.35	0.98803	0.02608	0.97777
6.36	0.98805	0.02207	0.97779
6.37	0.98806	0.01394	0.9778
6.38	0.98807	0.00966	0.97781
6.39	0.9881	0.01358	0.97784
6.4	0.98811	0.0115	0.97785
6.41	0.98812	0.01183	0.97786
6.42	0.98814	0.01254	0.97788
6.43	0.98815	0.00582	0.97789
6.44	0.98816	0.01799	0.97791
6.45	0.98818	0.01605	0.97792
6.46	0.98819	0.02305	0.97793
6.47	0.98821	0.02781	0.97796
6.48	0.98823	0.02065	0.97797
6.49	0.98824	0.02562	0.97798
6.5	0.98825	0.02518	0.978
6.51	0.98827	0.01484	0.97801
6.52	0.98828	0.01794	0.97802
6.53	0.98829	0.01443	0.97804
6.54	0.9883	0.02794	0.97805
6.55	0.98833	0.01418	0.97807
6.56	0.98834	0.01909	0.97808
6.57	0.98835	0.02117	0.9781
6.58	0.98836	0.02637	0.97811
6.59	0.98838	0.02383	0.97812
6.6	0.98839	0.02515	0.97814
6.61	0.9884	0.02295	0.97815
6.62	0.98842	0.02528	0.97816
6.63	0.98844	0.01012	0.97819
6.64	0.98845	0.01885	0.9782
6.65	0.98846	0.01222	0.97821
6.66	0.98848	0.01212	0.97822
6.67	0.98849	0.01567	0.97824
6.68	0.9885	0.01872	0.97825
6.69	0.98851	0.0209	0.97826
6.7	0.98852	0.00668	0.97827
6.71	0.98854	0.00979	0.9783
6.72	0.98856	0.0098	0.97831
6.73	0.98857	0.015	0.97832
6.74	0.98858	0.00574	0.97833
6.75	0.9886	0.00703	0.97835
6.76	0.98861	0.02223	0.97836
6.77	0.98862	0.02188	0.97837
6.78	0.98863	0.02426	0.97838
6.79	0.98864	0.01228	0.9784
6.8	0.98867	0.05221	0.97842
6.81	0.98868	0.04969	0.97843
6.82	0.98869	0.03531	0.97844
6.83	0.9887	0.04437	0.97845
6.84	0.98871	0.05373	0.97847
6.85	0.98872	0.0273	0.97848
6.86	0.98874	0.05649	0.97849
6.87	0.98875	0.02855	0.97851
6.88	0.98876	0.03918	0.97852
6.89	0.98877	0.00705	0.97853
6.9	0.98879	0.05958	0.97855
6.91	0.9888	0.02484	0.97856
6.92	0.98882	0.05006	0.97857
6.93	0.98883	0.05327	0.97858
6.94	0.98884	0.03053	0.97859
6.95	0.98885	0.03547	0.97862
6.96	0.98886	0.03912	0.97863
6.97	0.98887	0.05859	0.97864
6.98	0.98888	0.04165	0.97865
6.99	0.98891	0.03906	0.97866
7	0.98892	0.03757	0.97867
