# Supplementary material for: Exploring the role of macromolecular crowding and TNFR1 in cell volume control
Source: eLife journal article supplement (doi:10.7554/elife.92719), 2024-09-19
Supplement: fig3-data1 [file Fig3B-ii.xlsx]

## Sheet: Sheet1
Lag Time	mean MSD	sd	MSD	sd
s	nm\+(2)		nm\+(2)
	Lamellar		Perinuclear
0.02	428.832	144.144	329.519	224.137
0.04	818.215	297.332	432.982	248.989
0.06	1304.22	543.797	551.266	289.39
0.08	1857.78	829.96	673.397	367.644
0.1	2474.1	1185.81	783.578	430.567
0.12	3136.14	1596.35	897.041	509.407
0.14	3858.2	2052.12	1006.45	591.001
0.16	4633.58	2559.31	1127.12	669.494
0.18	5448.18	3085.4	1233.3	792.117
0.2	6295.19	3653.61	1366.36	915.024
0.22	7192.88	4252.39	1492.48	1008.86
0.24	8130.53	4889.42	1614.92	1121.49
0.26	9074.07	5542.04	1726.68	1248.54
0.28	10034.5	6216.17	1863.25	1351.47
0.3	11025.4	6905.96	1994.95	1487.57
0.32	12033.1	7631.52	2114.44	1599.2
0.34	13079.3	8392.49	2240.97	1724.81
0.36	14143.1	9163.34	2371.94	1843.69
0.38	15228.8	9947.27	2509.92	1953.86
0.4	16316.4	10739.7	2625.18	2080.58
0.42	17433.8	11572.1	2770.78	2185.26
0.44	18563.7	12413.4	2909.89	2312.48
0.46	19711.2	13285.1	3032.86	2417.58
0.48	20865.6	14164.6	3161.06	2521.87
0.5	22042.2	15068.7	3292.99	2640.72
0.52	23232.7	15978.8	3420.81	2759.79
0.54	24441.1	16911.4	3545.35	2855.55
0.56	25673.2	17868.1	3683.7	2965.8
0.58	26931.2	18841.3	3812.16	3089.9
0.6	28217.8	19824.5	3939.63	3221.95
0.62	29503.9	20807.7	4084.08	3323.88
0.64	30810.3	21805.6	4215.27	3443.12
0.66	32134.4	22813	4358.81	3584.27
0.68	33484.1	23836.2	4502.07	3716.32
0.7	34838.1	24868.4	4635.72	3829.65
0.72	36193.9	25906.9	4782.93	3973.37
0.74	37570.9	26949.2	4933.31	4096.58
0.76	38955.9	28019.2	5074.41	4215.76
0.78	40361.7	29094	5207.98	4340.85
0.8	41777	30187.4	5364.66	4484.75
0.82	43204.9	31290.7	5499.14	4612.58
0.84	44633.6	32396.2	5637.2	4742.22
0.86	46075	33511.3	5784.14	4878.61
0.88	47538.3	34634.6	5921.34	5013.49
0.9	49009.3	35764.5	6073.26	5139.96
0.92	50486.9	36897.1	6210.61	5277.03
0.94	51976.3	38025.3	6336.11	5389.26
0.96	53486.1	39178.2	6486.21	5517.64
0.98	55007.8	40329.7	6626.42	5636.76
1	56561.5	41498.1	6769.56	5773.78
1.02	58131.9	42680.5	6907.91	5904.69
1.04	59733.4	43874.9	7044.83	6028.61
1.06	61342.8	45079.7	7181.29	6149.93
1.08	62958	46309.1	7327.29	6273.01
1.1	64613.2	47564.8	7461.43	6392.49
1.12	66274.4	48833.6	7597.3	6526.88
1.14	67950.2	50107.6	7739.2	6644.49
1.16	69638.1	51383.1	7882.27	6768.05
1.18	71326.9	52664.2	8021.73	6883.51
1.2	73033.9	53971.7	8163.88	7005.18
1.22	74737.9	55273.2	8293.14	7100.83
1.24	76443.8	56585.6	8412.03	7202.5
1.26	78142.8	57901.4	8550.07	7286.32
1.28	79849.4	59234.5	8671.21	7403.94
1.3	81546.9	60561.9	8804.46	7506.5
1.32	83260.5	61900.6	8945.69	7614.62
1.34	84951.5	63242.7	9069.06	7709.74
1.36	86651.5	64611.8	9196.07	7810.85
1.38	88359.3	65996.4	9325.19	7904.07
1.4	90072.1	67416.4	9448.8	7978.28
1.42	91780.1	68846.9	9564.42	8063.22
1.44	93501.3	70284	9703.34	8152.01
1.46	95240.9	71732.1	9814.63	8214.25
1.48	97007.5	73197.5	9948.03	8307.08
1.5	98810.6	74676.3	10073.3	8386.82
1.52	100624	76168.7	10195.2	8469.56
1.54	102460	77670.5	10324.1	8563.95
1.56	104301	79195.2	10447.5	8637.97
1.58	106166	80746	10580.4	8735.53
1.6	108041	82301.7	10695.1	8829.48
1.62	109942	83870.2	10822	8896.48
1.64	111852	85464.6	10952.8	8992.3
1.66	113781	87071.3	11079.3	9082.71
1.68	115740	88702.3	11200.3	9133.69
1.7	117706	90349.6	11319.8	9222.78
1.72	119669	92011.7	11441.3	9288.78
1.74	121653	93679.6	11566.3	9364.44
1.76	123648	95381.9	11678.8	9445.36
1.78	125649	97096.9	11809.6	9531.11
1.8	127672	98836.4	11934.5	9607.31
1.82	129704	100565	12060.9	9699.7
1.84	131719	102291	12175.6	9764.83
1.86	133733	104029	12293.5	9846.99
1.88	135743	105766	12411.6	9920.97
1.9	137764	107527	12539.3	9999.6
1.92	139781	109293	12672.5	10065.7
1.94	141806	111057	12792.2	10127.5
1.96	143823	112797	12905.6	10176.5
1.98	145836	114544	13018.9	10233.6
2	147853	116269	13136.6	10271.9
2.02	149857	117989	13255.3	10318.7
2.04	151857	119709	13357.5	10359.8
2.06	153853	121434	13462.7	10419
2.08	155860	123162	13591.6	10471.6
2.1	157877	124904	13701.9	10508.6
2.12	159898	126650	13817.3	10549.5
2.14	161915	128401	13930.6	10595.2
2.16	163935	130157	14051.9	10667.9
2.18	165924	131872	14176.9	10720.7
2.2	167902	133584	14310.6	10788.3
2.22	169889	135299	14428.2	10829.5
2.24	171866	137016	14540.9	10868.2
2.26	173856	138740	14661.2	10913.1
2.28	175827	140448	14782.3	10969.9
2.3	177809	142172	14897.5	11033.7
2.32	179790	143905	15012.1	11074.7
2.34	181769	145631	15136.3	11134.6
2.36	183740	147340	15247.1	11180
2.38	185729	149044	15363.7	11223.4
2.4	187741	150762	15473.1	11267.8
2.42	189760	152487	15597	11319.2
2.44	191799	154235	15719.4	11365.4
2.46	193854	155994	15826.4	11403.8
2.48	195922	157756	15943.8	11443.6
2.5	197995	159506	16052.4	11471.2
2.52	200074	161251	16166.5	11519.3
2.54	202183	163000	16281.9	11557.1
2.56	204288	164739	16401.6	11593.3
2.58	206413	166464	16537.3	11656.7
2.6	208549	168192	16651.3	11702.8
2.62	210705	169927	16785.2	11747.2
2.64	212854	171653	16903	11798.3
2.66	215013	173371	17018.9	11838.4
2.68	217164	175078	17142.2	11881.1
2.7	219326	176786	17258.4	11933.1
2.72	221498	178495	17372.9	11982.6
2.74	223638	180157	17513.7	12064.4
2.76	225782	181816	17638.2	12132.1
2.78	227936	183477	17764.8	12188.5
2.8	230096	185123	17898.4	12265.4
2.82	232258	186760	18026.2	12318.8
2.84	234403	188384	18159.8	12390.9
2.86	236528	190002	18298.4	12455.8
2.88	238661	191629	18440.5	12516.5
2.9	240782	193249	18564.1	12580.3
2.92	242909	194877	18690.9	12636.1
2.94	245030	196481	18820.5	12688.5
2.96	247137	198055	18949.8	12730.4
2.98	249265	199648	19068.6	12764.6
3	251399	201247	19191.7	12813.2
3.02	253555	202871	19323.9	12851.5
3.04	255726	204508	19448.6	12885.5
3.06	257915	206161	19582.6	12926.8
3.08	260121	207838	19696.6	12949.7
3.1	262334	209509	19831	12980.8
3.12	264561	211192	19952.9	13015.9
3.14	266790	212889	20067.7	13043.8
3.16	269021	214589	20207	13093.1
3.18	271260	216301	20329.7	13128.6
3.2	273499	218040	20462.3	13158.5
3.22	275728	219790	20602.5	13212.1
3.24	277946	221542	20723	13239.7
3.26	280146	223260	20840.6	13264.5
3.28	282346	224993	20980	13296.9
3.3	284552	226737	21103.9	13319.1
3.32	286765	228509	21229.5	13345.3
3.34	288980	230283	21354.2	13361.2
3.36	291191	232067	21484.6	13375.9
3.38	293402	233853	21614.3	13407.6
3.4	295644	235657	21733.5	13424.2
3.42	297898	237494	21859.6	13450.8
3.44	300168	239348	21976.8	13467.6
3.46	302451	241193	22101.9	13479.2
3.48	304727	243029	22220	13482.4
3.5	307027	244892	22324.5	13471.8
3.52	309315	246738	22430.1	13465.3
3.54	311618	248595	22540	13461.1
3.56	313912	250442	22648.4	13464.2
3.58	316214	252284	22753.7	13459.6
3.6	318508	254119	22855	13452.7
3.62	320795	255960	22965.3	13459.2
3.64	323056	257796	23073.5	13464.9
3.66	325325	259654	23187.5	13476.2
3.68	327561	261464	23292.8	13474.2
3.7	329779	263246	23393.7	13462.3
3.72	331996	265043	23504.8	13466.4
3.74	334205	266843	23604	13466
3.76	336424	268655	23704.5	13448.5
3.78	338618	270430	23808.3	13427.6
3.8	340794	272202	23919.2	13425.4
3.82	342947	273900	24011.4	13409.4
3.84	345083	275587	24111.4	13403.7
3.86	347208	277278	24199.2	13384.8
3.88	349320	278961	24291.1	13375.1
3.9	351462	280648	24382.2	13360.3
3.92	353586	282332	24474.2	13353.4
3.94	355712	284009	24561.3	13338.4
3.96	357836	285686	24652	13315.2
3.98	359949	287371	24760.8	13325.6
4	362061	289012	24875.5	13338.3
4.02	364173	290636	24970.5	13342.3
4.04	366286	292269	25066.5	13351.1
4.06	368416	293905	25172.7	13361.1
4.08	370529	295514	25262.9	13350.2
4.1	372637	297105	25348.5	13345.7
4.12	374719	298635	25440.3	13339.4
4.14	376814	300178	25515.4	13322.5
4.16	378912	301710	25617.6	13332.7
4.18	381007	303240	25704.9	13326.8
4.2	383086	304737	25795.5	13331.9
4.22	385154	306231	25869.7	13316.1
4.24	387218	307736	25939.1	13300.9
4.26	389259	309233	26011.7	13294
4.28	391269	310704	26065.7	13270.8
4.3	393262	312192	26135.7	13268.3
4.32	395242	313663	26201.2	13269.7
4.34	397195	315127	26273.2	13263.7
4.36	399165	316589	26338	13266.1
4.38	401118	318049	26410.1	13262.5
4.4	403066	319520	26486	13268
4.42	405008	320974	26553.1	13272.8
4.44	406947	322412	26618	13277.7
4.46	408862	323841	26693	13289.9
4.48	410793	325293	26759.8	13290.7
4.5	412726	326735	26829.6	13311.3
4.52	414648	328185	26902.6	13318.1
4.54	416590	329612	26967.7	13324.5
4.56	418521	331020	27048.1	13352.1
4.58	420463	332401	27139.1	13383
4.6	422427	333804	27221.2	13417
4.62	424399	335217	27300.7	13433.6
4.64	426372	336633	27394.3	13473.9
4.66	428361	338038	27484.4	13518.8
4.68	430346	339447	27574	13557.4
4.7	432356	340883	27671.1	13606.7
4.72	434371	342331	27766.3	13647
4.74	436401	343791	27853.6	13686.3
4.76	438441	345268	27950.6	13727.6
4.78	440502	346762	28030.6	13754.7
4.8	442574	348277	28119.9	13779.1
4.82	444634	349798	28198	13811.6
4.84	446705	351323	28285.9	13851.9
4.86	448778	352854	28354.3	13879.5
4.88	450858	354410	28443.2	13923.6
4.9	452942	355958	28538.2	13974.8
4.92	455033	357507	28628.8	14019.4
4.94	457113	359062	28714.4	14050.6
4.96	459186	360588	28798.7	14087.9
4.98	461287	362100	28886.8	14130.7
5	463375	363601	28973.5	14181.3
5.02	465480	365084	29070.7	14231.7
5.04	467614	366553	29166.6	14284.1
5.06	469753	368031	29271	14339.7
5.08	471905	369511	29374.9	14392.4
5.1	474051	370978	29466.3	14441.2
5.12	476186	372419	29556.3	14481.7
5.14	478274	373820	29652.6	14544.9
5.16	480386	375229	29748.1	14593.3
5.18	482468	376621	29840.8	14632.7
5.2	484551	378009	29936.8	14674.9
5.22	486616	379396	30023.1	14708.3
5.24	488625	380709	30121.7	14755.3
5.26	490615	382019	30216.6	14809
5.28	492610	383346	30325.6	14875.7
5.3	494576	384637	30412.3	14925.7
5.32	496546	385920	30507.9	14985.6
5.34	498525	387214	30617.3	15055
5.36	500497	388479	30708	15103.3
5.38	502482	389753	30804.9	15155.5
5.4	504459	391033	30903.5	15211.6
5.42	506445	392316	30994.5	15254.8
5.44	508410	393560	31103.9	15315.8
5.46	510362	394808	31209.4	15380.9
5.48	512320	396079	31315.5	15445.8
5.5	514274	397324	31418.1	15499.5
5.52	516252	398603	31528.8	15559.3
5.54	518235	399881	31637.1	15619.5
5.56	520239	401180	31741.9	15663.6
5.58	522247	402471	31836.7	15714.4
5.6	524263	403780	31928.3	15763.7
5.62	526286	405086	32022.7	15815.2
5.64	528298	406385	32113	15855.5
5.66	530318	407677	32218.2	15905.9
5.68	532333	408942	32313.2	15952.1
5.7	534338	410190	32394.2	16001.9
5.72	536341	411435	32479.1	16046.1
5.74	538331	412682	32569.5	16096.1
5.76	540312	413910	32650.2	16142.3
5.78	542258	415089	32746.4	16196.4
5.8	544204	416261	32834.5	16240.1
5.82	546148	417444	32929	16292.6
5.84	548082	418611	33031.5	16344.5
5.86	550008	419775	33103.3	16383
5.88	551931	420948	33194.4	16453.8
5.9	553884	422164	33278.1	16493.6
5.92	555917	423452	33360.1	16538.3
5.94	557999	424836	33452.6	16596.2
5.96	560113	426240	33549.1	16674.1
5.98	562220	427657	33638.4	16739.5
6	564385	429134	33721.9	16809.4
6.02	566576	430647	33806.1	16880.1
6.04	568784	432190	33897.6	16953.2
6.06	570979	433741	33999.2	17047.9
6.08	573199	435295	34089	17125.4
6.1	575440	436918	34169.6	17193.7
6.12	577682	438560	34259.5	17264
6.14	579986	440258	34335.2	17330.6
6.16	582295	441979	34434.8	17418.3
6.18	584634	443711	34526.4	17484.3
6.2	586955	445466	34621.7	17556
6.22	589320	447271	34720.6	17637.7
6.24	591682	449064	34813.8	17703.1
6.26	594055	450867	34908.2	17780.4
6.28	596422	452659	34991.2	17837.3
6.3	598803	454476	35094.2	17915.1
6.32	601185	456282	35193.4	18001.4
6.34	603571	458114	35291.4	18084.1
6.36	605984	460034	35386.6	18160.5
6.38	608403	461958	35478.8	18243.4
6.4	610795	463881	35579	18329.3
6.42	613214	465828	35680.2	18424.5
6.44	615636	467827	35784.8	18515.3
6.46	618112	469893	35878.3	18601.9
6.48	620560	471933	35983.2	18689.6
6.5	623065	474060	36081.6	18772.9
6.52	625576	476185	36179	18862.1
6.54	628092	478293	36272.7	18935.6
6.56	630630	480408	36366.8	19035.7
6.58	633167	482537	36455.4	19115.8
6.6	635705	484638	36545	19204.7
6.62	638257	486773	36643.4	19291.3
6.64	640828	488921	36737.8	19376.7
6.66	643417	491102	36829.1	19452.8
6.68	646011	493285	36927	19534.2
6.7	648654	495480	37031.2	19618.2
6.72	651294	497691	37132.3	19710.4
6.74	653955	499920	37247.4	19828.2
6.76	656661	502177	37352.5	19925.2
6.78	659356	504445	37462.8	20023.2
6.8	662053	506717	37569.9	20107.2
6.82	664759	509016	37673.3	20194.3
6.84	667470	511343	37764.2	20270.5
6.86	670189	513669	37857.9	20346.5
6.88	672926	516030	37972.7	20447.1
6.9	675687	518397	38080	20546.2
6.92	678453	520778	38194.7	20641.6
6.94	681214	523162	38304.1	20719.5
6.96	684001	525550	38425.9	20823.8
6.98	686782	527932	38543.2	20916.7
7	689570	530325	38663.7	21023.8
7.02	692354	532701	38790.6	21139.7
7.04	695161	535103	38912.9	21245.6
7.06	697989	537543	39021.6	21329.5
7.08	700829	540026	39143.3	21423.6
7.1	703638	542461	39262.5	21521
7.12	706423	544904	39405.5	21652.8
7.14	709207	547333	39541.1	21770.8
7.16	711962	549763	39702.6	21916.8
7.18	714708	552187	39844.5	22042.6
7.2	717420	554578	39990.1	22183.1
7.22	720130	556959	40124.9	22296.7
7.24	722819	559332	40268.8	22421.6
7.26	725493	561704	40408	22547.8
7.28	728150	564096	40543.5	22682.3
7.3	730802	566475	40684.8	22818.1
7.32	733472	568883	40790.2	22908.6
7.34	736123	571282	40924.4	23017.7
7.36	738821	573700	41048.2	23120.8
7.38	741498	576115	41180.1	23242.6
7.4	744191	578526	41289.3	23336.7
7.42	746876	580920	41435.1	23474.2
7.44	749543	583275	41569.4	23590.7
7.46	752203	585624	41695.8	23706.4
7.48	754861	587949	41830.3	23820.7
7.5	757503	590234	41960.5	23928.9
7.52	760131	592516	42105.6	24047.7
7.54	762753	594769	42247.7	24159.6
7.56	765380	597016	42401.8	24289.9
7.58	768031	599283	42519.8	24391.9
7.6	770686	601536	42668.3	24517.3
7.62	773344	603794	42802.3	24637.6
7.64	776001	606038	42936.3	24749.6
7.66	778631	608286	43063.8	24873.3
7.68	781266	610533	43199.2	24993
7.7	783909	612788	43350.4	25121.1
7.72	786554	615066	43485	25233.2
7.74	789190	617315	43639.3	25358.6
7.76	791842	619588	43782.9	25496
7.78	794476	621856	43931	25618.1
7.8	797155	624160	44094.9	25757.1
7.82	799829	626478	44249.5	25890.3
7.84	802500	628850	44397.5	26022.7
7.86	805179	631222	44552.1	26160.3
7.88	807883	633604	44697.9	26293.4
7.9	810588	635983	44841.7	26417.9
7.92	813284	638372	44988.5	26543.9
7.94	816023	640782	45136.7	26670.5
7.96	818762	643192	45287	26794.8
7.98	821515	645607	45424.6	26910.6
8	824240	648010	45562.8	27023.7
8.02	826953	650423	45703.6	27137.1
8.04	829708	652828	45840.6	27247.8
8.06	832444	655260	45988.2	27372.7
8.08	835183	657712	46122	27487
8.1	837911	660214	46254.3	27591.8
8.12	840637	662728	46385.1	27693
8.14	843367	665265	46521.1	27792.2
8.16	846098	667780	46638.6	27875.9
8.18	848832	670321	46760.3	27972.5
8.2	851544	672873	46889	28059.3
8.22	854270	675458	47016.7	28156.5
8.24	857012	678097	47126.7	28225.8
8.26	859722	680720	47230.5	28298.6
8.28	862434	683349	47344.6	28386.4
8.3	865171	686032	47449.6	28484.2
8.32	867912	688714	47535.5	28516.7
8.34	870671	691425	47630.1	28578
8.36	873422	694131	47705.8	28604.7
8.38	876179	696846	47775.4	28620.3
8.4	878940	699572	47860.9	28663.7
8.42	881704	702272	47926.6	28690.1
8.44	884483	705002	48004.4	28715.9
8.46	887264	707733	48085.3	28741.2
8.48	890049	710470	48150	28752.8
8.5	892830	713192	48230.8	28766.6
8.52	895610	715899	48288.9	28769.4
8.54	898402	718611	48366.2	28773.2
8.56	901203	721343	48433.9	28801.8
8.58	904019	724094	48532.8	28844.1
8.6	906855	726911	48591	28841.7
8.62	909723	729762	48662.7	28850.6
8.64	912577	732626	48745.9	28874.3
8.66	915396	735488	48828.9	28905.8
8.68	918204	738382	48908.1	28949
8.7	921020	741303	48981.5	28966.3
8.72	923816	744243	49070.6	29001.2
8.74	926630	747172	49158.3	29021.9
8.76	929467	750114	49245.2	29059.4
8.78	932316	753086	49329.7	29098.3
8.8	935164	756096	49414.5	29121.8
8.82	938009	759119	49482.9	29140.1
8.84	940847	762140	49552.1	29151.5
8.86	943693	765189	49623.1	29166
8.88	946512	768217	49702	29181.2
8.9	949336	771265	49770.1	29200.7
8.92	952147	774291	49850.9	29220.3
8.94	954913	777311	49925.9	29221.2
8.96	957691	780353	50006.6	29227.6
8.98	960448	783431	50112.1	29280.6
9	963207	786536	50191.2	29298
9.02	965970	789629	50286.2	29319.1
9.04	968746	792756	50382.3	29366.2
9.06	971519	795864	50500.9	29417.6
9.08	974304	798990	50579.6	29427.5
9.1	977096	802146	50667.4	29439.5
9.12	979858	805266	50768.7	29463.9
9.14	982569	808396	50881.6	29516.2
9.16	985332	811521	50991.8	29557.4
9.18	988075	814644	51087.4	29570.4
9.2	990771	817760	51190.3	29604.8
9.22	993448	820868	51281.9	29627.1
9.24	996117	823954	51378.8	29652.9
9.26	998757	827055	51478.3	29683.5
9.28	1.00138e+06	830170	51585.9	29723.9
9.3	1.00399e+06	833279	51688.4	29772.2
9.32	1.00658e+06	836370	51795.7	29819
9.34	1.00917e+06	839467	51915.4	29864.6
9.36	1.01173e+06	842546	52009.5	29907.1
9.38	1.01431e+06	845630	52115.3	29950.9
9.4	1.01685e+06	848670	52264.8	30058.4
9.42	1.01938e+06	851685	52385.2	30120.7
9.44	1.02185e+06	854686	52516.9	30225.9
9.46	1.02432e+06	857671	52658.3	30286.7
9.48	1.0268e+06	860701	52762.7	30338.2
9.5	1.02929e+06	863742	52871.7	30392.9
9.52	1.03179e+06	866803	53027.2	30511.3
9.54	1.03427e+06	869881	53151	30624.9
9.56	1.03676e+06	872985	53286.9	30728.4
9.58	1.03923e+06	876086	53401.2	30817.9
9.6	1.04173e+06	879206	53540.9	30939.6
9.62	1.04426e+06	882368	53682.6	31074.4
9.64	1.04678e+06	885561	53816.3	31193.3
9.66	1.04934e+06	888814	53961	31313.1
9.68	1.05191e+06	892089	54103	31452
9.7	1.05447e+06	895408	54255.9	31600.7
9.72	1.05707e+06	898760	54390.4	31726.6
9.74	1.05968e+06	902167	54522	31852.8
9.76	1.06225e+06	905550	54659.2	31988.7
9.78	1.06482e+06	908935	54806.7	32119.4
9.8	1.06733e+06	912331	54941.5	32236.5
9.82	1.06984e+06	915735	55067.4	32310.8
9.84	1.07236e+06	919158	55187.4	32382.7
9.86	1.07487e+06	922617	55295.2	32442.4
9.88	1.07735e+06	926047	55413.2	32492.7
9.9	1.07981e+06	929510	55526.5	32559.7
9.92	1.08224e+06	932964	55636.6	32627.7
9.94	1.08472e+06	936456	55757.3	32680.7
9.96	1.08723e+06	939996	55852.2	32739.1
9.98	1.08972e+06	943559	55964	32803.3
10	1.09223e+06	947155	56087.3	32880.9
10.02	1.09476e+06	950745	56224.7	32965.4
10.04	1.09731e+06	954379	56316.9	33043.8
10.06	1.09984e+06	957961	56434.2	33124.2
10.08	1.10237e+06	961596	56553.4	33214.3
10.1	1.10487e+06	965205	56705.5	33326.9
10.12	1.1074e+06	968853	56837.8	33423.7
10.14	1.10988e+06	972459	56976.1	33527.7
10.16	1.1124e+06	976117	57112.8	33634.9
10.18	1.1149e+06	979773	57257.3	33753.2
10.2	1.11739e+06	983458	57416.6	33886.5
10.22	1.11988e+06	987160	57554.7	33990.1
10.24	1.12244e+06	990914	57699.7	34115.6
10.26	1.12499e+06	994675	57843	34226.6
10.28	1.12757e+06	998454	57997.7	34346.6
10.3	1.13018e+06	1.00225e+06	58160	34486.7
10.32	1.13281e+06	1.00608e+06	58326.9	34634
10.34	1.13546e+06	1.00995e+06	58493.1	34769.1
10.36	1.13811e+06	1.01387e+06	58642.4	34903.2
10.38	1.14077e+06	1.01782e+06	58816.5	35044.1
10.4	1.14344e+06	1.02177e+06	58969.1	35177.2
10.42	1.14615e+06	1.02574e+06	59114.7	35296.2
10.44	1.14884e+06	1.02972e+06	59271.1	35443
10.46	1.15156e+06	1.03375e+06	59425.1	35584.4
10.48	1.15427e+06	1.03779e+06	59586	35716.3
10.5	1.15698e+06	1.04181e+06	59744	35855.3
