# Supplementary material for: Exploring the role of macromolecular crowding and TNFR1 in cell volume control
Source: eLife journal article supplement (doi:10.7554/elife.92719), 2024-09-19
Supplement: fig3-data1 [file Fig3D.xlsx]

## Sheet: rEGFP_volume
Anisotropy							Cell Volume (µm3)
pretreatment	CytochalasinD	pretreatment	Nocodazole	pretreatment	Withaferin A		pretreatment	CytochalasinD	pretreatment	Nocodazole	pretreatment	Withaferin A
	2µM, 1h		20µM, 1h		3µM, 3h			2µM, 1h		20µM, 1h		3µM, 3h
0.2041	0.208	0.167	0.167	0.16405	0.1813		3806.91	3934.31	2019.83	2636.25	3883.65	4498.26
0.2037	0.212	0.169	0.177	0.17763	0.1791		3977.32	3884.29	1972.53	2415.17	3800.62	4342.09
0.2036	0.2121	0.16	0.17	0.17556	0.1808		3958.12	3539.74	2772.61	3028.97	2150.49	2238.38
0.203	0.2114	0.161	0.172	0.18453	0.1819		4458.27	4373.85	2242.59	3055.4	2986.54	3510.55
0.2022	0.2121	0.201	0.202	0.16737	0.1872		3536.6	3241.72	3256.88	4524.47	4172.24	3328.18
0.2072	0.2117	0.203	0.198	0.18685	0.1867		3335.98	3188.15	3472.3	4109.32	3441.53	3823.05
0.1959	0.2017	0.164	0.168	0.17687	0.1864		3469.14	3477.49	2021.45	2899.93	3348	3649.48
0.2043	0.209	0.164	0.168	0.17168	0.1702		3343.66	2882.74	2265.08	2771.92	2760.56	4180.9
0.1961	0.2033	0.165	0.169	0.178	0.1886		2224.2	2309.54	3297.01	3895.67
0.1922	0.1988	0.165	0.161	0.17434	0.1863		2284.29	2400.78	2139.36	2530.92
0.1831	0.1942	0.17	0.162	0.16688	0.1715		3300.76	3040.25
0.184	0.1981	0.173	0.162	0.19089	0.1897
0.1923	0.202	0.173	0.164	0.18043	0.1878
0.1983	0.2098	0.174	0.164	0.1878	0.1825
0.1982	0.2037	0.174	0.164	0.18968	0.1734
0.1978	0.209	0.174	0.165	0.19111	0.1866
0.1969	0.2138	0.175	0.165	0.18409	0.1897
0.1916	0.2058	0.176	0.176	0.18873	0.1844
0.1893	0.2104	0.204	0.205	0.17924	0.1897
0.1942	0.2049	0.206	0.197	0.17977	0.1856
0.2011	0.2143	0.177	0.166	0.18795	0.1822
0.1931	0.2043	0.179	0.167	0.18094	0.1874
0.1903	0.2035	0.18	0.167	0.19401	0.1906
0.1883	0.204	0.183	0.169	0.18518	0.1831
0.1892	0.2009	0.181	0.172	0.19178	0.1897
0.1829	0.2019	0.202	0.204	0.17739	0.1903
0.1829	0.2009	0.182	0.173	0.17881	0.1773
0.1854	0.1982	0.183	0.184	0.19932	0.1814
0.1819	0.1977	0.186	0.178	0.17829	0.1841
0.1768	0.1951	0.185	0.181	0.19793	0.1786
0.1831	0.1947	0.187	0.181	0.18694	0.1806
0.1792	0.1936	0.187	0.18	0.19525	0.179
0.181	0.1976	0.188	0.181	0.19509	0.1802
0.1768	0.1921	0.187	0.189	0.18771	0.1857
0.1779	0.1948	0.187	0.185	0.19632	0.1978
0.1673	0.194	0.189	0.186	0.19303	0.1959
0.1956	0.2097	0.19	0.186	0.19173	0.1871
0.1945	0.2036	0.192	0.187	0.20599	0.2043
0.1917	0.2003	0.192	0.186	0.20978	0.2075
0.1922	0.2014	0.193	0.188	0.1944	0.1875
0.1972	0.2026	0.193	0.188
0.1919	0.2082	0.194	0.19
0.1881	0.2024	0.194	0.19
0.1785	0.196	0.196	0.195
0.1838	0.1938	0.198	0.196
0.1656	0.1948	0.19294	0.189
0.1853	0.1925	0.195	0.189
0.1805	0.1982	0.1958	0.194
0.1796	0.199	0.197	0.195
		0.19253	0.193
		0.18285	0.174

## Sheet: rEGFP_SpatialHeterogeneity
0-10	2020-10-01	20-30	30-40	40-50	50-60	60-70	70-80	80-90	90-100
pre-CytoD
87.2221	87.3179	87.2734	86.2397	84.746	84.9292	83.3832	78.7139	69.6101	57.7702
90.8392	89.9666	88.1212	84.7542	80.8372	77.4405	73.7126	69.3648	74.5763	72.7024
89.3705	88.1004	87.2796	85.3683	81.7212	81.1098	76.0484	73.2593	74.3718	69.2086
89.244	89.1429	86.2392	82.5056	80.8316	82.3115	78.3904	72.3213	67.5809	56.7416
90.164	88.4582	82.018	77.6595	72.8856	66.1531	59.3318	56.8301	58.2628	58.6899
85.5639	83.1183	76.7778	74.5739	71.1462	70.81	65.6223	56.3918	54.1658	47.3061
85.8877	83.5449	75.6035	71.449	68.7326	64.1911	56.1283	66.2429	76.2186	81.0929
86.3094	82.6859	78.3691	74.3923	72.9117	71.3733	71.2401	57.9768	55.5191	54.7912
82.9836	81.5242	74.8847	72.2105	72.2192	75.0913	72.2807	60.811	54.4192	69.9453
90.8287	87.9059	80.6804	71.8527	66.101	64.6536	60.8061	59.9923	53.9127	52.0931
87.3179	87.2734	86.2397	84.746	82.9292	82.3832	76.7139	66.6101	53.7702	68.783
89.9666	88.1212	84.7542	80.8372	75.4405	72.7126	67.3648	71.5763	68.7024	56.2411
88.1004	87.2796	85.3683	81.7212	79.1098	75.0484	71.2593	71.3718	65.2086	51.5414
89.1429	86.2392	82.5056	80.8316	80.3115	77.3904	70.3213	64.5809	52.7416	65.1871
88.4582	82.018	77.6595	72.8856	64.1531	58.3318	54.8301	55.2628	54.6899	89.9349
83.1183	76.7778	74.5739	71.1462	68.81	64.6223	54.3918	51.1658	43.3061	78.7191
83.5449	75.6035	71.449	68.7326	62.1911	55.1283	64.2429	73.2186	77.0929	42.3233
82.6859	78.3691	74.3923	72.9117	69.3733	70.2401	55.9768	52.5191	50.7912	36.5783
81.5242	74.8847	72.2105	72.2192	73.0913	71.2807	58.811	51.4192	65.9453	63.0223
87.9059	80.6804	71.8527	66.101	62.6536	59.8061	57.9923	50.9127	48.0931	58.6057
93.234	91.2982	85.3026	75.0571	62.9089	58.1492	52.766	50.3127	47.5927	48.5807
93.173	92.3955	88.8546	82.1047	71.8392	69.5258	63.0793	46.9644	45.4064	53.3057
91.9337	89.2961	81.9917	70.7658	55.5543	43.8011	38.5227	34.9656	36.8899	32.246
90.0274	88.0397	80.1025	66.5802	59.5613	59.7324	65.6629	66.2833	54.8525	38.9723
86.2179	83.5982	71.5104	56.3573	53.3897	51.5864	45.8168	55.2956	61.6448	65.2376
87.5007	83.9117	76.3649	65.4177	53.1893	53.8396	62.6005	58.6854	52.6167	34.95
92.3638	91.4802	87.1138	78.9397	70.6757	72.9242	70.6724	66.1911	54.7279	47.7943
92.465	91.4091	88.9936	84.4602	79.386	73.6334	66.1668	58.767	53.0387	33.3805
91.9439	88.7435	79.6272	68.5529	59.3044	51.1892	45.4184	51.8725	50.2385	60.6967
90.1782	85.7805	78.1185	72.2468	67.6582	64.3759	57.4792	42.7261	39.1125	43.4666
91.2982	85.3026	75.0571	62.9089	56.1492	51.766	48.3127	44.5927	44.5807	52.7316
92.3955	88.8546	82.1047	71.8392	67.5258	62.0793	44.9644	42.4064	49.3057	60.7506
89.2961	81.9917	70.7658	55.5543	41.8011	37.5227	32.9656	33.8899	28.246	53.2049
88.0397	80.1025	66.5802	59.5613	57.7324	64.6629	64.2833	51.8525	34.9723	49.7542
83.5982	71.5104	56.3573	53.3897	49.5864	44.8168	53.2956	58.6448	61.2376	30.4869
83.9117	76.3649	65.4177	53.1893	51.8396	61.6005	56.6854	49.6167	30.95	41.9437
91.4802	87.1138	78.9397	70.6757	70.9242	69.6724	64.1911	51.7279	43.7943	37.8186
91.4091	88.9936	84.4602	79.386	71.6334	65.1668	56.767	50.0387	29.3805	78.8754
88.7435	79.6272	68.5529	59.3044	49.1892	44.4184	49.8725	47.2385	56.6967	28.4805
85.7805	78.1185	72.2468	67.6582	62.3759	56.4792	40.7261	36.1125	39.4666	36.7698
71.8109	70.5268	65.4924	55.5015	49.649	51.8676	44.9046	55.4101	61.3041	56.8248
71.5034	67.1303	59.6158	51.9066	52.6628	51.9742	48.1993	50.5222	28.6271	48.0256
65.4371	61.5009	60.0452	52.7943	40.9348	31.8647	64.6345	55.2314	55.0655	51.4362
71.5462	72.1015	71.9807	67.7166	62.5856	68.798	25.1787	58.0287	55.0356	48.7555
62.0424	57.8028	48.9281	53.2929	74.009	68.8881	68.762	34.4629	56.1228	34.6735
66.4875	63.8143	63.4576	64.1604	62.9354	57.0784	43.5605	51.8832	61.6716	76.9237
67.3444	63.5356	57.8097	53.9557	47.5101	38.6908	75.2314	39.9717	67.661	63.5999
72.2202	69.2331	66.0506	64.4173	62.4115	59.3779	44.5256	63.5511	56.308	48.7929
66.101	62.6536	57.8061	54.9923	45.9127	42.0931	49.6057	54.7362	27.1822	44.9678
92.9292	90.3832	83.7139	71.6101	55.7702	68.783	67.1596	77.7487	--	72.4909
post-CytoD
88.4437	88.2579	86.2696	83.734	81.4628	80.4752	78.4961	80.4233	75.8956	81.7257
79.868	75.956	77.006	77.3428	76.8549	73.4439	71.0882	73.0078	73.3127	87.7606
89.4843	86.9351	82.0414	78.329	75.9483	74.3598	72.2306	71.5107	62.5698	61.5945
93.322	92.4602	91.2432	88.0065	82.4364	81.7911	84.4462	88.0644	81.4797	78.3974
88.5716	88.2861	87.4677	85.3928	81.5543	79.2675	76.4885	75.0601	73.3882	63.8894
89.9391	88.8631	86.8811	83.7876	81.1314	76.7279	73.8177	75.6549	75.9521	72.6249
93.3675	93.4754	92.5728	89.5789	84.6792	80.3242	78.4267	79.5901	78.9832	83.1258
86.1005	85.1824	82.0516	79.8137	71.0466	63.1836	66.1932	59.9346	59.1843	60.8533
94.2618	94.1116	92.1714	89.6383	87.5135	86.2145	85.2463	85.8116	83.0389	76.5025
96.4772	94.7106	89.3762	86.2891	85.1409	82.9842	80.2107	80.5526	81.4152	63.1587
88.2579	86.2696	83.734	81.4628	80.4752	78.4961	77.4233	74.8956	80.7257	60.0834
75.956	77.006	77.3428	76.8549	73.4439	71.0882	70.0078	72.3127	86.7606	64.4919
86.9351	82.0414	78.329	75.9483	74.3598	72.2306	68.5107	61.5698	60.5945	63.8745
92.4602	91.2432	88.0065	82.4364	81.7911	84.4462	85.0644	80.4797	77.3974	99.588
88.2861	87.4677	85.3928	81.5543	79.2675	76.4885	72.0601	72.3882	62.8894	94.3402
88.8631	86.8811	83.7876	81.1314	76.7279	73.8177	72.6549	74.9521	71.6249	83.4256
93.4754	92.5728	89.5789	84.6792	80.3242	78.4267	76.5901	77.9832	82.1258	80.1001
85.1824	82.0516	79.8137	71.0466	63.1836	66.1932	56.9346	58.1843	59.8533	82.9464
94.1116	92.1714	89.6383	87.5135	86.2145	85.2463	82.8116	82.0389	75.5025	--
94.7106	89.3762	86.2891	85.1409	82.9842	80.2107	77.5526	80.4152	62.1587	72.794
86.2696	83.734	81.4628	80.4752	78.4961	77.4233	71.8956	79.7257	59.0834	60.5097
77.006	77.3428	76.8549	73.4439	71.0882	70.0078	69.3127	85.7606	63.4919	70.3353
82.0414	78.329	75.9483	74.3598	72.2306	68.5107	58.5698	59.5945	62.8745	51.402
91.2432	88.0065	82.4364	81.7911	84.4462	85.0644	77.4797	76.3974	98.588	63.7306
87.4677	85.3928	81.5543	79.2675	76.4885	72.0601	69.3882	61.8894	93.3402	83.0062
86.8811	83.7876	81.1314	76.7279	73.8177	72.6549	71.9521	70.6249	82.4256	81.1696
92.5728	89.5789	84.6792	80.3242	78.4267	76.5901	74.9832	81.1258	79.1001	73.6067
82.0516	79.8137	71.0466	63.1836	66.1932	56.9346	55.1843	58.8533	81.9464	42.4917
92.1714	89.6383	87.5135	86.2145	85.2463	82.8116	79.0389	74.5025	--	84.9998
89.3762	86.2891	85.1409	82.9842	80.2107	77.5526	77.4152	61.1587	71.794	63.4423
83.734	81.4628	80.4752	78.4961	77.4233	71.8956	76.7257	58.0834	59.5097	57.418
77.3428	76.8549	73.4439	71.0882	70.0078	69.3127	82.7606	62.4919	69.3353	66.1478
78.329	75.9483	74.3598	72.2306	68.5107	58.5698	56.5945	61.8745	50.402	67.465
88.0065	82.4364	81.7911	84.4462	85.0644	77.4797	73.3974	97.588	62.7306	64.9298
85.3928	81.5543	79.2675	76.4885	72.0601	69.3882	58.8894	92.3402	82.0062	75.8783
83.7876	81.1314	76.7279	73.8177	72.6549	71.9521	67.6249	81.4256	80.1696	86.0714
89.5789	84.6792	80.3242	78.4267	76.5901	74.9832	78.1258	78.1001	72.6067	63.4448
79.8137	71.0466	63.1836	66.1932	56.9346	55.1843	55.8533	80.9464	41.4917	86.1758
89.6383	87.5135	86.2145	85.2463	82.8116	79.0389	71.5025	--	83.9998	70.4202
86.2891	85.1409	82.9842	80.2107	77.5526	77.4152	58.1587	70.794	62.4423	73.7018
81.4628	80.4752	78.4961	77.4233	71.8956	76.7257	55.0834	58.5097	56.418	73.2053
76.8549	73.4439	71.0882	70.0078	69.3127	82.7606	59.4919	68.3353	65.1478	70.7469
75.9483	74.3598	72.2306	68.5107	58.5698	56.5945	58.8745	49.402	66.465	83.7186
82.4364	81.7911	84.4462	85.0644	77.4797	73.3974	94.588	61.7306	63.9298	82.9357
81.5543	79.2675	76.4885	72.0601	69.3882	58.8894	89.3402	81.0062	74.8783	64.0718
81.1314	76.7279	73.8177	72.6549	71.9521	67.6249	78.4256	79.1696	85.0714	51.7113
84.6792	80.3242	78.4267	76.5901	74.9832	78.1258	75.1001	71.6067	62.4448	87.5286
71.0466	63.1836	66.1932	56.9346	55.1843	55.8533	77.9464	40.4917	85.1758	73.8053
87.5135	86.2145	85.2463	82.8116	79.0389	71.5025	--	82.9998	69.4202	49.9533
86.9292	84.3832	77.7139	65.6101	49.7702	60.783	58.1596	69.7487	--	59.4909
pre-Noco
53.3635	54.7819	51.8059	50.9083	49.767	49.4712	49.1101	47.4327	44.947	40.3946
83.6742	80.3526	76.1759	75.1293	74.8109	73.5268	68.4924	58.5015	52.649	52.8676
90.0295	87.0921	83.2471	78.0378	74.5034	70.1303	62.6158	54.9066	55.6628	52.9742
79.5446	78.2375	72.3504	69.7375	68.4371	64.5009	63.0452	55.7943	43.9348	32.8647
89.2864	86.8383	81.0679	75.2497	74.5462	75.1015	74.9807	70.7166	65.5856	69.798
76.8853	76.6264	75.0563	68.7556	65.0424	60.8028	51.9281	56.2929	77.009	69.8881
89.5809	86.8914	81.7461	75.9496	69.4875	66.8143	66.4576	67.1604	65.9354	58.0784
86.3536	81.2539	74.9912	72.7982	70.3444	66.5356	60.8097	56.9557	50.5101	39.6908
80.6091	77.4764	77.0509	77.0265	75.2202	72.2331	69.0506	67.4173	65.4115	60.3779
87.9635	82.4063	77.1587	76.0731	71.9342	70.0256	77.7865	73.0102	69.7373	69.1866
54.7819	51.8059	50.9083	49.767	49.4712	49.1101	47.4327	44.947	40.3946	46.9501
80.3526	76.1759	75.1293	74.8109	73.5268	68.4924	58.5015	52.649	52.8676	44.9046
87.0921	83.2471	78.0378	74.5034	70.1303	62.6158	54.9066	55.6628	52.9742	48.1993
78.2375	72.3504	69.7375	68.4371	64.5009	63.0452	55.7943	43.9348	32.8647	64.6345
86.8383	81.0679	75.2497	74.5462	75.1015	74.9807	70.7166	65.5856	69.798	25.1787
76.6264	75.0563	68.7556	65.0424	60.8028	51.9281	56.2929	77.009	69.8881	68.762
86.8914	81.7461	75.9496	69.4875	66.8143	66.4576	67.1604	65.9354	58.0784	43.5605
81.2539	74.9912	72.7982	70.3444	66.5356	60.8097	56.9557	50.5101	39.6908	75.2314
77.4764	77.0509	77.0265	75.2202	72.2331	69.0506	67.4173	65.4115	60.3779	44.5256
82.4063	77.1587	76.0731	71.9342	70.0256	77.7865	73.0102	69.7373	69.1866	75.0597
51.8059	50.9083	49.767	49.4712	49.1101	47.4327	44.947	40.3946	46.9501	52.3228
76.1759	75.1293	74.8109	73.5268	68.4924	58.5015	52.649	52.8676	44.9046	53.4101
83.2471	78.0378	74.5034	70.1303	62.6158	54.9066	55.6628	52.9742	48.1993	48.5222
72.3504	69.7375	68.4371	64.5009	63.0452	55.7943	43.9348	32.8647	64.6345	53.2314
81.0679	75.2497	74.5462	75.1015	74.9807	70.7166	65.5856	69.798	25.1787	56.0287
75.0563	68.7556	65.0424	60.8028	51.9281	56.2929	77.009	69.8881	68.762	32.4629
81.7461	75.9496	69.4875	66.8143	66.4576	67.1604	65.9354	58.0784	43.5605	49.8832
74.9912	72.7982	70.3444	66.5356	60.8097	56.9557	50.5101	39.6908	75.2314	37.9717
77.0509	77.0265	75.2202	72.2331	69.0506	67.4173	65.4115	60.3779	44.5256	61.5511
77.1587	76.0731	71.9342	70.0256	77.7865	73.0102	69.7373	69.1866	75.0597	51.9763
50.9083	49.767	49.4712	49.1101	47.4327	44.947	40.3946	46.9501	52.3228	66.9189
75.1293	74.8109	73.5268	68.4924	58.5015	52.649	52.8676	44.9046	53.4101	56.3041
78.0378	74.5034	70.1303	62.6158	54.9066	55.6628	52.9742	48.1993	48.5222	23.6271
69.7375	68.4371	64.5009	63.0452	55.7943	43.9348	32.8647	64.6345	53.2314	50.0655
75.2497	74.5462	75.1015	74.9807	70.7166	65.5856	69.798	25.1787	56.0287	50.0356
68.7556	65.0424	60.8028	51.9281	56.2929	77.009	69.8881	68.762	32.4629	51.1228
75.9496	69.4875	66.8143	66.4576	67.1604	65.9354	58.0784	43.5605	49.8832	56.6716
72.7982	70.3444	66.5356	60.8097	56.9557	50.5101	39.6908	75.2314	37.9717	62.661
77.0265	75.2202	72.2331	69.0506	67.4173	65.4115	60.3779	44.5256	61.5511	51.308
76.0731	71.9342	70.0256	77.7865	73.0102	69.7373	69.1866	75.0597	51.9763	72.1343
49.767	49.4712	49.1101	47.4327	44.947	40.3946	46.9501	52.3228	66.9189	40.1687
88.3026	78.0571	65.9089	59.1492	52.766	48.3127	42.5927	39.5807	43.7316	40.7828
91.8546	85.1047	74.8392	70.5258	63.0793	44.9644	40.4064	44.3057	51.7506	42.5882
84.9917	73.7658	58.5543	44.8011	38.5227	32.9656	31.8899	23.246	44.2049	22.3802
83.1025	69.5802	62.5613	60.7324	65.6629	64.2833	49.8525	29.9723	40.7542	51.8219
74.5104	59.3573	56.3897	52.5864	45.8168	53.2956	56.6448	56.2376	21.4869	41.0131
79.3649	68.4177	56.1893	54.8396	62.6005	56.6854	47.6167	25.95	32.9437	43.8497
90.1138	81.9397	73.6757	73.9242	70.6724	64.1911	49.7279	38.7943	28.8186	42.2633
91.9936	87.4602	82.386	74.6334	66.1668	56.767	48.0387	24.3805	69.8754	90.219
82.6272	71.5529	62.3044	52.1892	45.4184	49.8725	45.2385	51.6967	19.4805	40.7469
81.1185	75.2468	70.6582	65.3759	57.4792	40.7261	34.1125	34.4666	27.7698	23.4298
post_Noco
78.4405	73.7126	67.3648	69.5763	63.7024	47.2411	58.7928	14.1821	58.904	39.4463
82.1098	76.0484	71.2593	69.3718	60.2086	42.5414	56.9354	16.9961	NaN	35.5728
83.3115	78.3904	70.3213	62.5809	47.7416	56.1871	64.4753	31.3931	NaN	38.9844
67.1531	59.3318	54.8301	53.2628	49.6899	80.9349	68.2691	63.081	55.6897	51.8217
71.81	65.6223	54.3918	49.1658	38.3061	69.7191	42.4824	58.1356	48.5342	34.2112
65.1911	56.1283	64.2429	71.2186	72.0929	33.3233	59.8073	61.7102	20.448	32.9225
72.3733	71.2401	55.9768	50.5191	45.7912	27.5783	65.9496	NaN	61.8203	63.3499
76.0913	72.2807	58.811	49.4192	60.9453	54.0223	36.7226	21.2101	46.6712	23.7326
65.6536	60.8061	57.9923	48.9127	43.0931	49.6057	52.7362	22.1822	35.9678	46.2592
83.3832	76.7139	64.6101	48.7702	59.783	57.1596	65.7487	NaN	53.4909	31.8745
73.7126	67.3648	69.5763	63.7024	47.2411	58.7928	14.1821	58.904	39.4463	NaN
76.0484	71.2593	69.3718	60.2086	42.5414	56.9354	16.9961	NaN	35.5728	52.5188
78.3904	70.3213	62.5809	47.7416	56.1871	64.4753	31.3931	NaN	38.9844	71.5636
59.3318	54.8301	53.2628	49.6899	80.9349	68.2691	63.081	55.6897	51.8217	63.8344
65.6223	54.3918	49.1658	38.3061	69.7191	42.4824	58.1356	48.5342	34.2112	76.7049
56.1283	64.2429	71.2186	72.0929	33.3233	59.8073	61.7102	20.448	32.9225	76.6101
71.2401	55.9768	50.5191	45.7912	27.5783	65.9496	NaN	61.8203	63.3499	33.1077
72.2807	58.811	49.4192	60.9453	54.0223	36.7226	21.2101	46.6712	23.7326	43.1978
60.8061	57.9923	48.9127	43.0931	49.6057	52.7362	22.1822	35.9678	46.2592	46.5714
76.7139	64.6101	48.7702	59.783	57.1596	65.7487	NaN	53.4909	31.8745	71.4065
67.3648	69.5763	63.7024	47.2411	58.7928	14.1821	58.904	39.4463	NaN	18.5914
71.2593	69.3718	60.2086	42.5414	56.9354	16.9961	NaN	35.5728	52.5188	61.4374
70.3213	62.5809	47.7416	56.1871	64.4753	31.3931	NaN	38.9844	71.5636	18.5032
54.8301	53.2628	49.6899	80.9349	68.2691	63.081	55.6897	51.8217	63.8344	48.438
54.3918	49.1658	38.3061	69.7191	42.4824	58.1356	48.5342	34.2112	76.7049	66.0922
64.2429	71.2186	72.0929	33.3233	59.8073	61.7102	20.448	32.9225	76.6101	41.8855
55.9768	50.5191	45.7912	27.5783	65.9496	NaN	61.8203	63.3499	33.1077	47.8297
58.811	49.4192	60.9453	54.0223	36.7226	21.2101	46.6712	23.7326	43.1978	86.6023
57.9923	48.9127	43.0931	49.6057	52.7362	22.1822	35.9678	46.2592	46.5714	67.2774
64.6101	48.7702	59.783	57.1596	65.7487	NaN	53.4909	31.8745	71.4065	69.8842
69.5763	63.7024	47.2411	58.7928	14.1821	58.904	39.4463	NaN	18.5914	68.9104
69.3718	60.2086	42.5414	56.9354	16.9961	NaN	35.5728	52.5188	61.4374	71.5307
62.5809	47.7416	56.1871	64.4753	31.3931	NaN	38.9844	71.5636	18.5032	16.2647
53.2628	49.6899	80.9349	68.2691	63.081	55.6897	51.8217	63.8344	48.438	33.5443
49.1658	38.3061	69.7191	42.4824	58.1356	48.5342	34.2112	76.7049	66.0922	12.2788
71.2186	72.0929	33.3233	59.8073	61.7102	20.448	32.9225	76.6101	41.8855	52.4672
50.5191	45.7912	27.5783	65.9496	NaN	61.8203	63.3499	33.1077	47.8297	59.1261
49.4192	60.9453	54.0223	36.7226	21.2101	46.6712	23.7326	43.1978	86.6023	70.9259
48.9127	43.0931	49.6057	52.7362	22.1822	35.9678	46.2592	46.5714	67.2774	30.0657
48.7702	59.783	57.1596	65.7487	NaN	53.4909	31.8745	71.4065	69.8842	50.4876
63.7024	47.2411	58.7928	14.1821	58.904	39.4463	NaN	18.5914	68.9104	34.7214
60.2086	42.5414	56.9354	16.9961	NaN	35.5728	52.5188	61.4374	71.5307	75.8683
47.7416	56.1871	64.4753	31.3931	NaN	38.9844	71.5636	18.5032	16.2647	69.8552
49.6899	80.9349	68.2691	63.081	55.6897	51.8217	63.8344	48.438	33.5443	41.3859
38.3061	69.7191	42.4824	58.1356	48.5342	34.2112	76.7049	66.0922	12.2788	43.0857
72.0929	33.3233	59.8073	61.7102	20.448	32.9225	76.6101	41.8855	52.4672	43.1167
45.7912	27.5783	65.9496	NaN	61.8203	63.3499	33.1077	47.8297	59.1261	44.3501
60.9453	54.0223	36.7226	21.2101	46.6712	23.7326	43.1978	86.6023	70.9259	NaN
43.0931	49.6057	52.7362	22.1822	35.9678	46.2592	46.5714	67.2774	30.0657	33.1666
59.783	57.1596	65.7487	NaN	53.4909	31.8745	71.4065	69.8842	50.4876	34.5447
47.2411	58.7928	14.1821	58.904	39.4463	NaN	18.5914	68.9104	34.7214	66.9094
pre-WFA
90.2734	89.2397	87.746	85.9292	83.3832	76.7139	64.6101	48.7702	59.783	57.1596
91.1212	87.7542	83.8372	78.4405	73.7126	67.3648	69.5763	63.7024	47.2411	58.7928
90.2796	88.3683	84.7212	82.1098	76.0484	71.2593	69.3718	60.2086	42.5414	56.9354
89.2392	85.5056	83.8316	83.3115	78.3904	70.3213	62.5809	47.7416	56.1871	64.4753
85.018	80.6595	75.8856	67.1531	59.3318	54.8301	53.2628	49.6899	80.9349	68.2691
79.7778	77.5739	74.1462	71.81	65.6223	54.3918	49.1658	38.3061	69.7191	42.4824
78.6035	74.449	71.7326	65.1911	56.1283	64.2429	71.2186	72.0929	33.3233	59.8073
81.3691	77.3923	75.9117	72.3733	71.2401	55.9768	50.5191	45.7912	27.5783	65.9496
77.8847	75.2105	75.2192	76.0913	72.2807	58.811	49.4192	60.9453	54.0223	36.7226
83.6804	74.8527	69.101	65.6536	60.8061	57.9923	48.9127	43.0931	49.6057	52.7362
89.2397	87.746	85.9292	83.3832	76.7139	64.6101	48.7702	59.783	57.1596	65.7487
87.7542	83.8372	78.4405	73.7126	67.3648	69.5763	63.7024	47.2411	58.7928	14.1821
88.3683	84.7212	82.1098	76.0484	71.2593	69.3718	60.2086	42.5414	56.9354	16.9961
85.5056	83.8316	83.3115	78.3904	70.3213	62.5809	47.7416	56.1871	64.4753	31.3931
80.6595	75.8856	67.1531	59.3318	54.8301	53.2628	49.6899	80.9349	68.2691	63.081
77.5739	74.1462	71.81	65.6223	54.3918	49.1658	38.3061	69.7191	42.4824	58.1356
74.449	71.7326	65.1911	56.1283	64.2429	71.2186	72.0929	33.3233	59.8073	61.7102
77.3923	75.9117	72.3733	71.2401	55.9768	50.5191	45.7912	27.5783	65.9496	NaN
75.2105	75.2192	76.0913	72.2807	58.811	49.4192	60.9453	54.0223	36.7226	21.2101
74.8527	69.101	65.6536	60.8061	57.9923	48.9127	43.0931	49.6057	52.7362	22.1822
87.746	85.9292	83.3832	76.7139	64.6101	48.7702	59.783	57.1596	65.7487	NaN
83.8372	78.4405	73.7126	67.3648	69.5763	63.7024	47.2411	58.7928	14.1821	58.904
84.7212	82.1098	76.0484	71.2593	69.3718	60.2086	42.5414	56.9354	16.9961	NaN
83.8316	83.3115	78.3904	70.3213	62.5809	47.7416	56.1871	64.4753	31.3931	NaN
75.8856	67.1531	59.3318	54.8301	53.2628	49.6899	80.9349	68.2691	63.081	55.6897
74.1462	71.81	65.6223	54.3918	49.1658	38.3061	69.7191	42.4824	58.1356	48.5342
71.7326	65.1911	56.1283	64.2429	71.2186	72.0929	33.3233	59.8073	61.7102	20.448
75.9117	72.3733	71.2401	55.9768	50.5191	45.7912	27.5783	65.9496	NaN	61.8203
75.2192	76.0913	72.2807	58.811	49.4192	60.9453	54.0223	36.7226	21.2101	46.6712
81.1185	75.2468	70.6582	65.3759	57.4792	40.7261	34.1125	34.4666	27.7698	23.4298
78.0571	65.9089	59.1492	52.766	48.3127	42.5927	39.5807	43.7316	40.7828	22.8054
85.1047	74.8392	70.5258	63.0793	44.9644	40.4064	44.3057	51.7506	42.5882	41.769
73.7658	58.5543	44.8011	38.5227	32.9656	31.8899	23.246	44.2049	22.3802	30.4933
69.5802	62.5613	60.7324	65.6629	64.2833	49.8525	29.9723	40.7542	51.8219	32.592
59.3573	56.3897	52.5864	45.8168	53.2956	56.6448	56.2376	21.4869	41.0131	32.2517
68.4177	56.1893	54.8396	62.6005	56.6854	47.6167	25.95	32.9437	43.8497	32.0676
81.9397	73.6757	73.9242	70.6724	64.1911	49.7279	38.7943	28.8186	42.2633	19.6002
87.4602	82.386	74.6334	66.1668	56.767	48.0387	24.3805	69.8754	90.219	45.2882
71.5529	62.3044	52.1892	45.4184	49.8725	45.2385	51.6967	19.4805	40.7469	50.8202
75.2468	70.6582	65.3759	57.4792	40.7261	34.1125	34.4666	27.7698	23.4298	40.8602
post-WFA
93.525	87.6208	75.9889	58.2627	51.8989	46.3394	39.8844	52.1448	50.6949	47.8947
96.0946	95.9793	92.9061	85.4095	77.3388	67.305	61.6915	49.8126	41.4901	40.6218
93.5001	90.5281	82.0589	70.885	65.4513	61.5098	54.1057	50.0223	31.016	19.7921
92.5839	76.259	65.3334	62.6016	64.9102	56.1422	48.2594	55.2381	50.403	27.1211
95.069	91.0738	74.8355	65.4217	62.172	56.0272	48.896	45.8202	50.9001	54.4164
92.5851	89.4855	84.7358	77.9245	70.1432	59.4557	50.513	43.8217	55.8553	49.5368
83.8355	73.8043	70.9625	70.3217	70.9766	70.5643	67.6552	56.0747	56.0743	57.3646
79.8181	76.5172	63.9873	58.2401	63.8912	59.5909	50.3996	47.0438	43.5217	37.7066
95.5707	93.6731	86.3043	77.0593	72.875	64.4541	58.0423	49.0386	44.4852	31.0414
91.4814	88.0221	77.5824	70.4791	65.3501	61.8219	58.784	54.0512	42.9844	33.2355
87.6208	75.9889	58.2627	51.8989	46.3394	39.8844	52.1448	50.6949	47.8947	44.9669
95.9793	92.9061	85.4095	77.3388	67.305	61.6915	49.8126	41.4901	40.6218	43.5648
90.5281	82.0589	70.885	65.4513	61.5098	54.1057	50.0223	31.016	19.7921	31.9287
76.259	65.3334	62.6016	64.9102	56.1422	48.2594	55.2381	50.403	27.1211	22.2726
91.0738	74.8355	65.4217	62.172	56.0272	48.896	45.8202	50.9001	54.4164	25.3344
89.4855	84.7358	77.9245	70.1432	59.4557	50.513	43.8217	55.8553	49.5368	35.8204
73.8043	70.9625	70.3217	70.9766	70.5643	67.6552	56.0747	56.0743	57.3646	55.1475
76.5172	63.9873	58.2401	63.8912	59.5909	50.3996	47.0438	43.5217	37.7066	49.0776
93.6731	86.3043	77.0593	72.875	64.4541	58.0423	49.0386	44.4852	31.0414	18.8046
88.0221	77.5824	70.4791	65.3501	61.8219	58.784	54.0512	42.9844	33.2355	40.5464
75.9889	58.2627	51.8989	46.3394	39.8844	52.1448	50.6949	47.8947	44.9669	34.5361
92.9061	85.4095	77.3388	67.305	61.6915	49.8126	41.4901	40.6218	43.5648	25.9962
82.0589	70.885	65.4513	61.5098	54.1057	50.0223	31.016	19.7921	31.9287	49.8091
65.3334	62.6016	64.9102	56.1422	48.2594	55.2381	50.403	27.1211	22.2726	30.8847
74.8355	65.4217	62.172	56.0272	48.896	45.8202	50.9001	54.4164	25.3344	35.8563
84.7358	77.9245	70.1432	59.4557	50.513	43.8217	55.8553	49.5368	35.8204	44.2481
70.9625	70.3217	70.9766	70.5643	67.6552	56.0747	56.0743	57.3646	55.1475	16.9356
63.9873	58.2401	63.8912	59.5909	50.3996	47.0438	43.5217	37.7066	49.0776	77.9917
86.3043	77.0593	72.875	64.4541	58.0423	49.0386	44.4852	31.0414	18.8046	34.8602
77.5824	70.4791	65.3501	61.8219	58.784	54.0512	42.9844	33.2355	40.5464	87.6473
58.2627	51.8989	46.3394	39.8844	52.1448	50.6949	47.8947	44.9669	34.5361	27.6236
85.4095	77.3388	67.305	61.6915	49.8126	41.4901	40.6218	43.5648	25.9962	35.2268
70.885	65.4513	61.5098	54.1057	50.0223	31.016	19.7921	31.9287	49.8091	40.4997
62.6016	64.9102	56.1422	48.2594	55.2381	50.403	27.1211	22.2726	30.8847	40.1994
65.4217	62.172	56.0272	48.896	45.8202	50.9001	54.4164	25.3344	35.8563	66.3702
77.9245	70.1432	59.4557	50.513	43.8217	55.8553	49.5368	35.8204	44.2481	28.9767
70.3217	70.9766	70.5643	67.6552	56.0747	56.0743	57.3646	55.1475	16.9356	33.7995
58.2401	63.8912	59.5909	50.3996	47.0438	43.5217	37.7066	49.0776	77.9917	40.3547
77.0593	72.875	64.4541	58.0423	49.0386	44.4852	31.0414	18.8046	34.8602	26.0661
70.4791	65.3501	61.8219	58.784	54.0512	42.9844	33.2355	40.5464	87.6473	48.7014
