# Supplementary material for: Exploring the role of macromolecular crowding and TNFR1 in cell volume control
Source: eLife journal article supplement (doi:10.7554/elife.92719), 2024-09-19
Supplement: fig3-data1 [file FigS3A.xlsx]

## Sheet: Sheet1
Time	Normalized Recovery	sd	Normalized Recovery	sd	Normalized Recovery	sd					Lag Time	MSD	sd	MSD	sd	MSD	sd
s	BSA 0mM		BSA 2.26mM		BSA 4.52mM						s	nm\+(2)		nm\+(2)		nm\+(2)
0	0.90096	0.00859	0.87251	0.00779	0.79279	0.03006						0 mM		2.26 mM		4.52 mM
0.02114	0.90651	0.00576	0.87836	0.00487	0.80195	0.03308					0.1056	20890	9140	10210	4590	1730	969.827
0.04228	0.91146	0.00547	0.88369	0.00316	0.81034	0.02621					0.2112	48180	21900	24480	11000	3200	1960
0.06342	0.91592	0.00237	0.88857	0.00271	0.81805	0.03043					0.3168	75930	34370	38450	17260	4670	2950
0.08456	0.91729	0.00415	0.89009	0.00544	0.82045	0.02424					0.4224	104850	47740	51840	23980	6260	3950
0.1057	0.91995	0.005	0.89306	0.00115	0.82515	0.02651					0.528	136850	62030	65520	31150	8000	4980
0.12684	0.92361	0.00301	0.8972	0.00252	0.83172	0.02004					0.6336	167850	79610	79590	39970	9630	6040
0.14798	0.92695	0.00327	0.90104	0.00137	0.83782	0.02312					0.7392	197250	100100	93280	50250	11410	7180
0.16912	0.929	0.00437	0.90341	0.00766	0.8416	0.01806					0.8448	225420	119850	108510	60150	13020	8260
0.19026	0.93001	0.00376	0.90459	0.00257	0.84349	0.02117					0.9504	256870	139180	123960	69850	14750	9380
0.2114	0.93283	0.00379	0.9079	0.00628	0.84877	0.01307					1.056	290530	157870	138840	79220	16510	10530
0.23254	0.93542	0.00256	0.91099	0.00408	0.85371	0.01867					1.1616	327390	179370	154120	90010	18290	11700
0.25368	0.9378	0.0041	0.91385	0.00409	0.85829	0.00863					1.2672	365990	204000	169380	102360	19900	12840
0.27482	0.93783	0.0024	0.91388	0.00336	0.85834	0.01182					1.3728	404740	228170	183960	114490	21650	13980
0.29596	0.94006	0.00291	0.91659	0.0039	0.86268	0.01091					1.4784	445630	254490	198630	127690	23400	15130
0.3171	0.94214	0.00331	0.91913	0.00616	0.86677	0.01399					1.584	490620	281100	213250	141040	25350	16300
0.33824	0.94407	0.00284	0.92152	0.00461	0.87062	0.00818					1.6896	534920	306800	227680	153930	27360	17470
0.35938	0.94467	0.00503	0.92226	0.00359	0.8718	0.01116					1.7952	579600	328540	241640	164850	29500	18680
0.38052	0.94588	0.00279	0.92377	0.00235	0.87425	0.00917					1.9008	624220	349610	256350	175430	31490	19840
0.40166	0.94758	0.00413	0.9259	0.0055	0.87769	0.01144					2.0064	670190	369600	272880	185470	33580	20990
0.4228	0.94918	0.00313	0.92791	0.003	0.88094	0.01253					2.112	719740	388820	290320	195130	35430	22090
0.44394	0.95016	0.00319	0.92916	0.00238	0.88296	0.0077					2.2176	770260	407360	308520	204450	37170	23150
0.46508	0.95068	0.00461	0.92982	0.00692	0.88402	0.01027					2.3232	821830	426930	326880	214290	38900	24210
0.48622	0.95209	0.00321	0.93163	0.0036	0.88695	0.00402					2.4288	876030	448330	345300	225040	40690	25320
0.50736	0.95343	0.00425	0.93335	0.00419	0.88973	0.00254					2.5344	932950	470860	363290	236360	42550	26460
0.5285	0.95467	0.00125	0.93495	0.00388	0.89233	0.00746					2.64	995740	498170	381670	250080	44640	27680
0.54964	0.95469	0.0016	0.93498	0.00473	0.89238	0.00486					2.7456	1059030	528410	399000	265260	46700	28900
0.57078	0.95589	0.00323	0.93653	0.00449	0.89491	0.00843					2.8512	1124680	560160	416640	234520	48870	30130
0.59192	0.95702	0.00357	0.93802	0.00332	0.89732	0.01016					2.9568	1194510	594010	435690	213340	51010	31380
0.61306	0.9581	0.00401	0.93943	0.00353	0.89962	0.00751					3.0624	1265760	630550	454500	198310	53090	32630
0.6342	0.95842	0.00299	0.93986	0.00375	0.90031	0.00884					3.168	1336570	663750	472260	205570	54950	33810
0.65534	0.95913	0.00146	0.94078	0.00416	0.90182	0.00317					3.2736	1409410	695310	488790	212110	56950	35000
0.67648	0.9601	0.00534	0.94207	0.00479	0.90393	0.00542					3.3792	1487600	728670	502820	219000	58720	36180
0.69762	0.96103	0.00355	0.94331	0.00437	0.90594	0.0035					3.4848	1566930	764340	516740	226370	60520	37380
0.71876	0.96161	0.00464	0.94408	0.00437	0.90719	0.01004					3.5904	1645290	796910	530390	232630	62480	38590
0.7399	0.96192	0.00272	0.9445	0.00602	0.90788	0.00493					3.696	1725510	828410	541860	238410	64640	39790
0.76104	0.96277	0.0055	0.94563	0.00344	0.90974	0.00544					3.8016	1806460	864540	552800	245340	66420	40910
0.78218	0.96358	0.00171	0.94672	0.00574	0.91152	0.00168					3.9072	1882650	899100	563060	251630	68480	42080
0.80332	0.96434	0.00588	0.94774	0.00229	0.91318	0.00736					4.0128	1962540	933810	574720	257800	70430	43230
0.82446	0.96436	0.00359	0.94777	0.00499	0.91323	0.00422					4.1184	2039550	966200	587730	263170	72300	44350
0.8456	0.9651	0.00307	0.94878	0.0014	0.91488	0.00531					4.224	2121070	999710	603440	268710	74090	45380
0.86674	0.96582	0.00237	0.94975	0.00683	0.91647	0.00329					4.3296	2198060	1035100	619700	274590	75820	46460
0.88788	0.9665	0.00232	0.95068	0.00567	0.918	0.00826					4.4352	2281850	1073540	636070	281120	78040	47690
0.90902	0.9667	0.00276	0.95096	0.00419	0.91845	0.0062					4.5408	2364170	1110750	651810	287170	80200	48860
0.93016	0.96716	0.00613	0.95158	0.0038	0.91947	0.01266					4.6464	2448800	1148630	667950	293240	82580	50120
0.9513	0.9678	0.00481	0.95245	0.00647	0.9209	0.00533					4.752	2540380	1188530	683530	299670	84870	51450
0.97244	0.9684	0.00289	0.95329	0.00471	0.92227	0.01235					4.8576	2628650	1227060	699640	305610	87140	52730
0.99358	0.96878	0.00257	0.9538	0.00472	0.92311	0.00795					4.9632	2703030	1257560	715140	309430	89830	54200
1.01472	0.96899	0.00292	0.9541	0.00108	0.9236	0.00954					5.0688	2770610	1282640	730470	311840	92310	55540
1.03586	0.96956	0.00271	0.95488	0.00328	0.92488	0.01035					5.1744	2830890	1306950	747180	314010	95050	56930
1.057	0.9701	0.00361	0.95563	0.00414	0.92612	0.00635					5.28	2900330	1335700	764030	317180	98170	58400
1.07814	0.97061	0.00269	0.95633	0.00354	0.92727	0.0043					5.3856	2980080	1367640	779740	321040	101160	59940
1.09928	0.97063	0.00336	0.95636	0.00156	0.92732	0.00476					5.4912	3067350	1404700	795180	325990	104020	61480
1.12042	0.97113	0.00386	0.95707	0.00161	0.92848	0.00615					5.5968	3154900	1445680	810210	331720	107260	63120
1.14156	0.97162	0.00522	0.95775	0.00724	0.9296	0.00629					5.7024	3243470	1486830	826700	337360	110160	64650
1.1627	0.9721	0.00143	0.95841	0.00402	0.93069	0.00528					5.808	3325710	1526300	842730	342500	113460	66400
1.18384	0.97223	0.00179	0.9586	0.00539	0.931	0.00776					5.9136	3410260	1563060	860500	346940	116810	68270
1.20498	0.97256	0.0043	0.95905	0.00185	0.93175	0.00622					6.0192	3505170	1602310	880900	351830	120000	70160
1.22612	0.973	0.00211	0.95968	0.00432	0.93277	0.00455					6.1248	3604990	1644200	901910	357200	123300	72150
1.24726	0.97343	0.00462	0.96028	0.00129	0.93377	0.00722					6.2304	3703750	1685400	922440	362300	126470	74030
1.2684	0.97369	0.0036	0.96064	0.00416	0.93437	0.00502					6.336	3818470	1731780	945600	368400	130210	76190
1.28954	0.97385	0.00371	0.96086	0.0038	0.93473	0.01306					6.4416	3932620	1780580	969580	374890	134020	78320
1.31068	0.97425	0.00406	0.96143	0.00496	0.93567	0.00706					6.5472	4055600	1834080	990090	382220	137760	80290
1.33182	0.97464	0.00255	0.96199	0.00794	0.93658	0.00684					6.6528	4166860	1884830	1012060	388830	141370	82180
1.35296	0.975	0.00272	0.9625	0.00253	0.93742	0.00465					6.7584	4282950	1937560	1034850	395710	145460	84010
1.3741	0.97502	0.00177	0.96252	0.00268	0.93747	0.00424					6.864	4394810	1990070	1055870	402410	149850	85920
1.39524	0.97539	0.00547	0.96304	0.00238	0.93833	0.00355					6.9696	4504820	2041000	1080390	408660	153540	87630
1.41638	0.97575	0.00118	0.96355	0.00367	0.93917	0.00269					7.0752	4602950	2083490	1105380	413130	157550	89340
1.43752	0.97609	0.00258	0.96405	0.00202	0.93998	0.00626					7.1808	4690740	2117990	1127710	415950	162320	91210
1.45866	0.97619	0.00379	0.96418	0.00462	0.94021	0.00838					7.2864	4775040	2150400	1145890	418310	166820	92920
1.4798	0.97643	0.00286	0.96453	0.00206	0.94077	0.00825					7.392	4851560	2184440	1161390	420940	171640	94910
1.50094	0.97676	0.00609	0.96499	0.00398	0.94155	0.00837					7.4976	4919120	2214280	1183740	422710	175830	96610
1.52208	0.97708	0.00277	0.96545	0.0032	0.9423	0.00523					7.6032	4977500	2239980	1207180	423670	180160	98180
1.54322	0.97727	0.00268	0.96572	0.0029	0.94275	0.00915					7.7088	5020740	2256050	1232760	422810	184200	99550
1.56436	0.97739	0.00345	0.96589	0.00462	0.94303	0.00624					7.8144	5089100	2285190	1259830	424390	187910	100980
1.5855	0.97769	0.00354	0.96633	0.0039	0.94375	0.00558					7.92	5172160	2322730	1284860	427490	191000	102440
1.60664	0.97798	0.00614	0.96675	0.0032	0.94445	0.007					8.0256	5260240	2365210	1307170	431420	194610	104240
1.62778	0.97825	0.00147	0.96714	0.00684	0.94509	0.00718					8.1312	5351390	2407790	1331880	435310	197840	105920
1.64892	0.97827	0.00369	0.96716	0.0038	0.94513	0.00634					8.2368	5423820	2442440	1351040	437710	201090	107510
1.67006	0.97855	0.00179	0.96756	0.00326	0.94579	0.00488					8.3424	5495410	2484390	1369110	441350	204810	109310
1.6912	0.97882	0.00511	0.96795	0.0029	0.94644	0.00921					8.448	5564910	2526090	1390670	444890	208530	111220
1.71234	0.97909	0.00298	0.96834	0.00292	0.94707	0.0078
1.73348	0.97916	0.00277	0.96844	0.00375	0.94724	0.00508
1.75462	0.97934	0.00256	0.96871	0.00737	0.94769	0.00343
1.77576	0.9796	0.00243	0.96907	0.00505	0.9483	0.0049
1.7969	0.97984	0.00335	0.96943	0.0046	0.94889	0.00514
1.81804	0.97999	0.00624	0.96964	0.00293	0.94923	0.00633
1.83918	0.98008	0.00276	0.96978	0.00377	0.94946	0.0041
1.86032	0.98032	0.00463	0.97012	0.00343	0.95003	0.00305
1.88146	0.98055	0.00271	0.97045	0.00506	0.95058	0.00447
1.9026	0.98076	0.00114	0.97075	0.00583	0.95108	0.00571
1.92374	0.98077	0.00358	0.97078	0.00677	0.95112	0.00449
1.94488	0.98099	0.00181	0.97109	0.00505	0.95165	0.00322
1.96602	0.9812	0.00286	0.97141	0.00614	0.95216	0.00266
1.98716	0.98141	0.00267	0.97171	0.00326	0.95267	0.00352
2.0083	0.98147	0.00409	0.97179	0.00761	0.9528	0.003
2.02944	0.98162	0.00326	0.97201	0.00628	0.95316	0.00337
2.05058	0.98182	0.00291	0.9723	0.00562	0.95365	0.00643
2.07172	0.98201	0.00153	0.97259	0.00369	0.95412	0.00329
2.09286	0.98213	0.0044	0.97275	0.00631	0.9544	0.00573
2.114	0.98221	0.00359	0.97287	0.00426	0.95459	0.00487
2.13514	0.98239	0.00396	0.97314	0.00458	0.95504	0.00759
2.15628	0.98258	0.00319	0.97341	0.00736	0.95549	0.00466
2.17742	0.98274	0.00253	0.97365	0.00344	0.95589	0.00648
2.19856	0.98276	0.00351	0.97367	0.00654	0.95593	0.00557
2.2197	0.98293	0.00374	0.97393	0.00347	0.95636	0.00919
2.24084	0.98311	0.00401	0.97419	0.00295	0.95678	0.00608
2.26198	0.98327	0.00488	0.97444	0.0037	0.95719	0.00487
2.28312	0.98332	0.001	0.9745	0.00646	0.95729	0.00668
2.30426	0.98344	0.00349	0.97468	0.00844	0.9576	0.00859
2.3254	0.9836	0.00301	0.97492	0.00838	0.958	0.00506
2.34654	0.98376	0.00207	0.97515	0.00526	0.95839	0.01119
2.36768	0.98385	0.00346	0.97529	0.00213	0.95861	0.00613
2.38882	0.98392	0.00265	0.97538	0.00241	0.95877	0.00508
2.40996	0.98407	0.0049	0.97561	0.00474	0.95915	0.00332
2.4311	0.98422	0.00401	0.97583	0.00289	0.95951	0.00597
2.45224	0.98436	0.00724	0.97603	0.0022	0.95985	0.00573
2.47338	0.98437	0.0061	0.97605	0.00313	0.95988	0.0073
2.49452	0.98451	0.00405	0.97626	0.00347	0.96023	0.0061
2.51566	0.98466	0.00537	0.97647	0.00313	0.96058	0.00518
2.5368	0.9848	0.00457	0.97668	0.00319	0.96093	0.00403
2.55794	0.98483	0.00253	0.97673	0.00837	0.96101	0.00362
2.57908	0.98493	0.00371	0.97688	0.0069	0.96127	0.00602
2.60022	0.98507	0.0049	0.97708	0.0022	0.9616	0.01136
2.62136	0.9852	0.00451	0.97728	0.00231	0.96192	0.00508
2.6425	0.98528	0.00282	0.97739	0.00405	0.96211	0.00993
2.66364	0.98533	0.00505	0.97747	0.00451	0.96225	0.00695
2.68478	0.98546	0.00267	0.97766	0.00591	0.96256	0.00736
2.70592	0.98558	0.00179	0.97785	0.0025	0.96287	0.00957
2.72706	0.9857	0.00544	0.97801	0.004	0.96315	0.00337
2.7482	0.98571	0.00305	0.97803	0.0043	0.96318	0.00317
2.76934	0.98583	0.00551	0.97821	0.00226	0.96348	0.00472
2.79048	0.98595	0.00566	0.97839	0.00688	0.96377	0.00489
2.81162	0.98607	0.00476	0.97856	0.00461	0.96406	0.00152
2.83276	0.98609	0.00254	0.9786	0.00381	0.96413	0.00476
2.8539	0.98618	0.00541	0.97874	0.00688	0.96435	0.0057
2.87504	0.98629	0.00275	0.97891	0.00251	0.96463	0.0032
2.89618	0.98641	0.0043	0.97907	0.00283	0.96491	0.00354
2.91732	0.98647	0.00221	0.97916	0.00518	0.96506	0.00469
2.93846	0.98652	0.00448	0.97924	0.00272	0.96518	0.00582
2.9596	0.98662	0.0035	0.9794	0.00447	0.96545	0.00622
2.98074	0.98673	0.00326	0.97956	0.00637	0.96571	0.00338
3.00188	0.98682	0.00616	0.97969	0.01031	0.96595	0.01353
3.02302	0.98683	0.00336	0.97971	0.000791338	0.96597	0.00471
3.04416	0.98694	0.00281	0.97987	0.00545	0.96623	0.01636
3.0653	0.98704	0.00234	0.98002	0.00532	0.96648	0.0077
3.08644	0.98714	0.00475	0.98017	0.0042	0.96673	0.01118
3.10758	0.98716	0.00691	0.9802	0.00706	0.96679	0.00995
3.12872	0.98724	0.00565	0.98031	0.0119	0.96698	0.00501
3.14986	0.98733	0.00377	0.98046	0.00459	0.96722	0.00224
3.171	0.98743	0.00326	0.9806	0.00667	0.96746	0.00252
3.19214	0.98748	0.00298	0.98068	0.00835	0.96759	0.00293
3.21328	0.98752	0.00252	0.98074	0.00354	0.96769	0.00363
3.23442	0.98761	0.0019	0.98088	0.0054	0.96792	0.00198
3.25556	0.98771	0.00217	0.98102	0.00504	0.96815	0.00237
3.2767	0.98779	0.00363	0.98114	0.00285	0.96835	0.00324
3.29784	0.9878	0.00461	0.98115	0.00326	0.96838	0.00624
3.31898	0.98788	0.00387	0.98129	0.00236	0.9686	0.00254
3.34012	0.98797	0.00155	0.98142	0.00395	0.96882	0.00526
3.36126	0.98806	0.00543	0.98155	0.00117	0.96903	0.00398
3.3824	0.98808	0.00228	0.98157	0.00325	0.96908	0.00771
3.40354	0.98814	0.00814	0.98167	0.0029	0.96925	0.00591
3.42468	0.98823	0.00519	0.9818	0.00408	0.96946	0.0059
3.44582	0.98831	0.00379	0.98192	0.0048	0.96966	0.004
3.46696	0.98835	0.00433	0.98199	0.00287	0.96977	0.01158
3.4881	0.98839	0.00177	0.98204	0.0048	0.96987	0.00437
3.50924	0.98847	0.00234	0.98217	0.00618	0.97007	0.01048
3.53038	0.98855	0.00431	0.98228	0.00357	0.97027	0.00438
3.55152	0.98862	0.00399	0.98239	0.00436	0.97044	0.00562
3.57266	0.98863	0.00329	0.9824	0.00557	0.97046	0.0029
3.5938	0.9887	0.00214	0.98252	0.00326	0.97066	0.00813
3.61494	0.98878	0.00252	0.98263	0.00331	0.97085	0.0038
3.63608	0.98885	0.00183	0.98275	0.00463	0.97104	0.0091
3.65722	0.98887	0.00515	0.98277	0.00416	0.97107	0.00754
3.67836	0.98893	0.00571	0.98286	0.00577	0.97122	0.00855
3.6995	0.989	0.00447	0.98297	0.00471	0.97141	0.00397
3.72064	0.98907	0.00356	0.98308	0.00325	0.97159	0.00579
3.74178	0.98911	0.0021	0.98313	0.00168	0.97168	0.0036
3.76292	0.98914	0.00352	0.98318	0.0028	0.97177	0.00289
3.78406	0.98921	0.00593	0.98329	0.00249	0.97194	0.0032
3.8052	0.98928	0.00409	0.98339	0.00731	0.97212	0.00621
3.82634	0.98934	0.00282	0.98348	0.00289	0.97227	0.00329
3.84748	0.98935	0.00182	0.9835	0.00436	0.97229	0.00375
3.86862	0.98942	0.00493	0.9836	0.00434	0.97246	0.00492
3.88976	0.98949	0.00718	0.9837	0.00794	0.97263	0.00331
3.9109	0.98955	0.0015	0.9838	0.00509	0.9728	0.00672
3.93204	0.98956	0.00458	0.98382	0.0052	0.97283	0.00676
3.95318	0.98962	0.00303	0.9839	0.00119	0.97296	0.00413
3.97432	0.98968	0.00255	0.98399	0.00216	0.97312	0.008
3.99546	0.98974	0.00474	0.98409	0.00635	0.97328	0.00321
4.0166	0.98978	0.00288	0.98414	0.00217	0.97337	0.00966
4.03774	0.98981	0.00726	0.98418	0.00319	0.97344	0.00636
4.05888	0.98987	0.00349	0.98428	0.00381	0.9736	0.00427
4.08002	0.98993	0.00402	0.98437	0.00542	0.97375	0.00399
4.10116	0.98998	0.00252	0.98445	0.00213	0.97388	0.01019
4.1223	0.98999	0.000964252	0.98446	0.00219	0.97391	0.00429
4.14344	0.99005	0.00132	0.98455	0.00251	0.97406	0.00596
4.16458	0.99011	0.00169	0.98464	0.00235	0.97421	0.0061
4.18572	0.99017	0.00698	0.98473	0.0046	0.97435	0.00562
4.20686	0.99018	0.00288	0.98475	0.00577	0.97438	0.00697
4.228	0.99022	0.00231	0.98482	0.00229	0.9745	0.00794
4.24914	0.99028	0.0038	0.9849	0.00254	0.97464	0.00878
4.27028	0.99034	0.00298	0.98499	0.00527	0.97479	0.00372
4.29142	0.99037	0.00611	0.98503	0.000800928	0.97486	0.00403
4.31256	0.99039	0.00103	0.98507	0.00268	0.97493	0.00424
4.3337	0.99045	0.00411	0.98516	0.00232	0.97507	0.00559
4.35484	0.9905	0.00338	0.98524	0.00358	0.97521	0.00782
4.37598	0.99055	0.00158	0.98531	0.00557	0.97532	0.00653
4.39712	0.99056	0.00218	0.98532	0.00403	0.97534	0.00548
4.41826	0.99061	0.00294	0.9854	0.00369	0.97548	0.00271
4.4394	0.99066	0.00682	0.98548	0.00681	0.97561	0.00678
4.46054	0.99071	0.00348	0.98556	0.00331	0.97574	0.00703
4.48168	0.99072	0.00345	0.98557	0.00359	0.97577	0.00401
4.50282	0.99076	0.00369	0.98564	0.00495	0.97587	0.00311
4.52396	0.99082	0.00252	0.98572	0.00541	0.976	0.01106
4.5451	0.99087	0.0021	0.98579	0.00506	0.97613	0.01066
4.56624	0.99089	0.00176	0.98583	0.00522	0.97619	0.00766
4.58738	0.99092	0.00189	0.98587	0.00171	0.97626	0.00639
4.60852	0.99096	0.00373	0.98594	0.00324	0.97638	0.00365
4.62966	0.99101	0.00425	0.98602	0.00539	0.97651	0.00622
4.6508	0.99105	0.00279	0.98608	0.00389	0.97661	0.00934
4.67194	0.99106	0.00343	0.98609	0.00256	0.97663	0.00762
4.69308	0.99111	0.00306	0.98616	0.00425	0.97675	0.00439
4.71422	0.99116	0.00385	0.98624	0.00349	0.97687	0.00901
4.73536	0.9912	0.00389	0.98631	0.00344	0.97699	0.0028
4.7565	0.99121	0.0023	0.98632	0.00702	0.97701	0.00411
4.77764	0.99125	0.00326	0.98638	0.00406	0.97711	0.00673
4.79878	0.99129	0.00121	0.98645	0.00497	0.97722	0.0091
4.81992	0.99134	0.00539	0.98651	0.00283	0.97734	0.01365
4.84106	0.99136	0.00312	0.98655	0.00404	0.97739	0.01535
4.8622	0.99138	0.00287	0.98658	0.00315	0.97745	0.02124
4.88334	0.99143	0.00166	0.98665	0.00444	0.97757	0.02216
4.90448	0.99147	0.00572	0.98672	0.00393	0.97768	0.01826
4.92562	0.99151	0.0052	0.98677	0.00549	0.97777	0.01108
4.94676	0.99152	0.00366	0.98678	0.00217	0.97779	0.00574
4.9679	0.99156	0.00817	0.98685	0.000983316	0.9779	0.0037
4.98904	0.9916	0.00356	0.98691	0.00182	0.97801	0.00482
5.01018	0.99164	0.00269	0.98698	0.00424	0.97811	0.00314
5.03132	0.99165	0.00281	0.98699	0.00197	0.97813	0.00737
5.05246	0.99168	0.00256	0.98704	0.00544	0.97822	0.00848
5.0736	0.99173	0.00275	0.9871	0.00184	0.97833	0.00665
5.09474	0.99177	0.00422	0.98717	0.00118	0.97843	0.01164
5.11588	0.99179	0.00213	0.9872	0.00298	0.97848	0.00834
5.13702	0.99181	0.00214	0.98723	0.00257	0.97853	0.01167
5.15816	0.99185	0.00382	0.98729	0.00567	0.97864	0.0048
5.1793	0.99189	0.00284	0.98735	0.00377	0.97874	0.00705
5.20044	0.99192	0.00357	0.9874	0.00203	0.97882	0.00471
5.22158	0.99193	0.00407	0.98741	0.00192	0.97884	0.00953
5.24272	0.99196	0.00349	0.98747	0.00472	0.97894	0.00462
5.26386	0.992	0.00636	0.98753	0.00315	0.97904	0.00849
5.285	0.99204	0.00591	0.98759	0.00405	0.97913	0.0082
5.30614	0.99205	0.00329	0.9876	0.00615	0.97915	0.00434
5.32728	0.99208	0.00756	0.98764	0.00466	0.97923	0.00396
5.34842	0.99212	0.00215	0.9877	0.00276	0.97933	0.00691
5.36956	0.99215	0.00389	0.98776	0.0028	0.97942	0.00938
5.3907	0.99217	0.00452	0.98779	0.00597	0.97947	0.00401
5.41184	0.99219	0.00471	0.98782	0.0044	0.97952	0.00685
5.43298	0.99223	0.00309	0.98787	0.00646	0.97961	0.00614
5.45412	0.99226	0.00246	0.98793	0.00328	0.9797	0.00458
5.47526	0.99229	0.00546	0.98797	0.00543	0.97977	0.00535
5.4964	0.9923	0.00191	0.98798	0.00771	0.97979	0.00571
5.51754	0.99233	0.00252	0.98803	0.00308	0.97988	0.00786
5.53868	0.99237	0.00178	0.98809	0.00426	0.97997	0.00939
5.55982	0.9924	0.00345	0.98814	0.00264	0.98006	0.00384
5.58096	0.99241	0.00561	0.98815	0.00314	0.98007	0.00276
5.6021	0.99244	0.00124	0.98819	0.00454	0.98015	0.00984
5.62324	0.99247	0.00325	0.98825	0.00515	0.98024	0.00995
5.64438	0.99251	0.00475	0.9883	0.00593	0.98033	0.00376
5.66552	0.99252	0.00376	0.98832	0.01929	0.98037	0.00219
5.68666	0.99254	0.00468	0.98835	0.00828	0.98041	0.00333
5.7078	0.99257	0.00418	0.9884	0.00712	0.9805	0.00427
5.72894	0.9926	0.00365	0.98845	0.0017	0.98058	0.00462
5.75008	0.99263	0.0019	0.98849	0.00435	0.98065	0.00294
5.77122	0.99264	0.00371	0.9885	0.00667	0.98067	0.00609
5.79236	0.99267	0.00383	0.98855	0.00329	0.98075	0.00365
5.8135	0.9927	0.0043	0.9886	0.00234	0.98083	0.00418
5.83464	0.99273	0.00297	0.98865	0.00304	0.98091	0.00769
5.85578	0.99274	0.00432	0.98865	0.00315	0.98092	0.00632
5.87692	0.99276	0.00399	0.9887	0.00164	0.98099	0.00685
5.89806	0.9928	0.00273	0.98875	0.0037	0.98107	0.00499
5.9192	0.99283	0.00234	0.98879	0.00208	0.98115	0.00364
5.94034	0.99284	0.00264	0.98881	0.00402	0.98119	0.008
5.96148	0.99286	0.00397	0.98884	0.00481	0.98123	0.00798
5.98262	0.99289	0.00264	0.98889	0.00137	0.98131	0.00609
6.00376	0.99292	0.00174	0.98893	0.00424	0.98139	0.00502
6.0249	0.99294	0.00136	0.98897	0.00454	0.98145	0.00312
6.04604	0.99295	0.00304	0.98898	0.00578	0.98147	0.00406
6.06718	0.99298	0.00297	0.98902	0.00366	0.98154	0.00705
6.08832	0.99301	0.00434	0.98907	0.00365	0.98162	0.0042
6.10946	0.99304	0.00696	0.98911	0.00619	0.98169	0.00686
6.1306	0.99304	0.0051	0.98912	0.00333	0.9817	0.00518
6.15174	0.99307	0.00266	0.98916	0.00431	0.98177	0.0066
6.17288	0.99309	0.00317	0.9892	0.00306	0.98184	0.00795
6.19402	0.99312	0.00401	0.98925	0.00493	0.98191	0.00401
6.21516	0.99313	0.00177	0.98927	0.00263	0.98195	0.00591
6.2363	0.99315	0.00431	0.98929	0.00203	0.98199	0.00222
6.25744	0.99318	0.0029	0.98933	0.00504	0.98206	0.00553
6.27858	0.99321	0.00193	0.98938	0.005	0.98213	0.00383
6.29972	0.99323	0.00235	0.98941	0.00567	0.98219	0.00481
6.32086	0.99323	0.00322	0.98942	0.00319	0.9822	0.0039
6.342	0.99326	0.00206	0.98946	0.00323	0.98227	0.00703
6.36314	0.99329	0.00859	0.9895	0.00779	0.98234	0.03006
6.38428	0.99332	0.00576	0.98954	0.00487	0.98241	0.03308
6.40542	0.99332	0.00547	0.98955	0.00316	0.98242	0.02621
6.42656	0.99334	0.00237	0.98958	0.00271	0.98248	0.03043
6.4477	0.99337	0.00415	0.98963	0.00544	0.98255	0.02424
6.46884	0.99339	0.005	0.98967	0.00115	0.98262	0.02651
6.48998	0.99341	0.00301	0.98968	0.00252	0.98265	0.02004
6.51112	0.99342	0.00327	0.98971	0.00137	0.98268	0.02312
6.53226	0.99345	0.00437	0.98975	0.00766	0.98275	0.01806
6.5534	0.99347	0.00376	0.98978	0.00257	0.98282	0.02117
6.57454	0.99349	0.00379	0.98981	0.00628	0.98287	0.01307
6.59568	0.9935	0.00256	0.98982	0.00408	0.98288	0.01867
6.61682	0.99352	0.0041	0.98986	0.00409	0.98295	0.00863
6.63796	0.99355	0.0024	0.9899	0.00336	0.98301	0.01182
6.6591	0.99357	0.00291	0.98994	0.0039	0.98308	0.01091
6.68024	0.99357	0.00331	0.98994	0.00616	0.98308	0.01399
6.70138	0.9936	0.00284	0.98998	0.00461	0.98314	0.00818
6.72252	0.99362	0.00503	0.99002	0.00359	0.9832	0.01116
6.74366	0.99365	0.00279	0.99005	0.00235	0.98327	0.00917
6.7648	0.99366	0.00413	0.99007	0.0055	0.98329	0.01144
6.78594	0.99367	0.00313	0.99009	0.003	0.98333	0.01253
6.80708	0.99369	0.00319	0.99013	0.00238	0.98339	0.0077
6.82822	0.99372	0.00461	0.99016	0.00692	0.98345	0.01027
6.84936	0.99374	0.00321	0.99019	0.0036	0.9835	0.00402
6.8705	0.99374	0.00425	0.9902	0.00419	0.98351	0.00254
6.89164	0.99376	0.00125	0.99024	0.00388	0.98357	0.00746
6.91278	0.99379	0.0016	0.99027	0.00473	0.98363	0.00486
6.93392	0.99381	0.00323	0.99031	0.00449	0.98369	0.00843
6.95506	0.99381	0.00357	0.99031	0.00332	0.9837	0.01016
6.9762	0.99383	0.00401	0.99034	0.00353	0.98375	0.00751
6.99734	0.99386	0.00299	0.99038	0.00375	0.98381	0.00884
7.01848	0.99388	0.00146	0.99041	0.00416	0.98387	0.00317
7.03962	0.99389	0.00534	0.99043	0.00479	0.98389	0.00542
7.06076	0.9939	0.00355	0.99045	0.00437	0.98393	0.0035
7.0819	0.99392	0.00464	0.99048	0.00437	0.98398	0.01004
7.10304	0.99395	0.00272	0.99051	0.00602	0.98404	0.00493
7.12418	0.99396	0.0055	0.99054	0.00344	0.98408	0.00544
7.14532	0.99397	0.00171	0.99055	0.00574	0.9841	0.00168
7.16646	0.99399	0.00588	0.99058	0.00229	0.98415	0.00736
7.1876	0.99401	0.00359	0.99062	0.00499	0.98421	0.00422
7.20874	0.99403	0.00307	0.99065	0.0014	0.98427	0.00531
7.22988	0.99403	0.00237	0.99065	0.00683	0.98427	0.00329
7.25102	0.99405	0.00232	0.99068	0.00567	0.98432	0.00826
7.27216	0.99407	0.00276	0.99071	0.00419	0.98438	0.0062
7.2933	0.99409	0.00613	0.99075	0.0038	0.98443	0.01266
7.31444	0.9941	0.00481	0.99076	0.00647	0.98445	0.00533
7.33558	0.99412	0.00289	0.99078	0.00471	0.98448	0.01235
7.35672	0.99414	0.00257	0.99081	0.00472	0.98454	0.00795
7.37786	0.99416	0.00292	0.99084	0.00108	0.98459	0.00954
7.399	0.99417	0.00271	0.99087	0.00328	0.98463	0.01035
7.42014	0.99418	0.00361	0.99087	0.00414	0.98464	0.00635
7.44128	0.9942	0.00269	0.9909	0.00354	0.9847	0.0043
7.46242	0.99422	0.00336	0.99094	0.00156	0.98475	0.00476
7.48356	0.99424	0.00386	0.99097	0.00161	0.9848	0.00615
7.5047	0.99424	0.00522	0.99097	0.00724	0.9848	0.00629
7.52584	0.99426	0.00143	0.991	0.00402	0.98485	0.00528
7.54698	0.99428	0.00179	0.99103	0.00539	0.9849	0.00776
7.56812	0.9943	0.0043	0.99106	0.00185	0.98495	0.00622
7.58926	0.9943	0.00211	0.99107	0.00432	0.98497	0.00455
7.6104	0.99432	0.00462	0.99109	0.00129	0.985	0.00722
7.63154	0.99434	0.0036	0.99112	0.00416	0.98505	0.00502
7.65268	0.99435	0.00371	0.99115	0.0038	0.9851	0.01306
7.67382	0.99437	0.00406	0.99117	0.00496	0.98514	0.00706
7.69496	0.99437	0.00255	0.99118	0.00794	0.98515	0.00684
7.7161	0.99439	0.00272	0.99121	0.00253	0.9852	0.00465
7.73724	0.99441	0.00177	0.99124	0.00268	0.98525	0.00424
7.75838	0.99443	0.00547	0.99126	0.00238	0.9853	0.00355
7.77952	0.99443	0.00118	0.99127	0.00367	0.9853	0.00269
7.80066	0.99445	0.00258	0.99129	0.00202	0.98535	0.00626
7.8218	0.99447	0.00379	0.99132	0.00462	0.98539	0.00838
7.84294	0.99448	0.00286	0.99135	0.00206	0.98544	0.00825
7.86408	0.99449	0.00609	0.99136	0.00398	0.98546	0.00837
7.88522	0.9945	0.00277	0.99138	0.0032	0.98549	0.00523
7.90636	0.99452	0.00268	0.99141	0.0029	0.98554	0.00915
7.9275	0.99454	0.00345	0.99143	0.00462	0.98558	0.00624
7.94864	0.99455	0.00354	0.99145	0.0039	0.98562	0.00558
7.96978	0.99456	0.00614	0.99146	0.0032	0.98563	0.007
7.99092	0.99457	0.00147	0.99149	0.00684	0.98568	0.00718
8.01206	0.99459	0.00369	0.99152	0.0038	0.98572	0.00634
8.0332	0.99461	0.00179	0.99154	0.00326	0.98577	0.00488
8.05434	0.99461	0.00511	0.99154	0.0029	0.98577	0.00921
8.07548	0.99463	0.00298	0.99157	0.00292	0.98581	0.0078
8.09662	0.99464	0.00277	0.9916	0.00375	0.98586	0.00508
8.11776	0.99466	0.00256	0.99162	0.00737	0.9859	0.00343
8.1389	0.99467	0.00243	0.99163	0.00505	0.98592	0.0049
8.16004	0.99468	0.00335	0.99165	0.0046	0.98594	0.00514
8.18118	0.9947	0.00624	0.99168	0.00293	0.98599	0.00633
8.20232	0.99471	0.00276	0.9917	0.00377	0.98603	0.0041
8.22346	0.99472	0.00463	0.99172	0.00343	0.98606	0.00305
8.2446	0.99473	0.00271	0.99173	0.00506	0.98608	0.00447
8.26574	0.99475	0.00114	0.99175	0.00583	0.98612	0.00571
8.28688	0.99476	0.00358	0.99178	0.00677	0.98616	0.00449
8.30802	0.99478	0.00181	0.9918	0.00505	0.9862	0.00322
8.32916	0.99478	0.00286	0.9918	0.00614	0.98621	0.00266
8.3503	0.99479	0.00267	0.99183	0.00326	0.98625	0.00352
8.37144	0.99481	0.00409	0.99185	0.00761	0.98629	0.003
8.39258	0.99483	0.00326	0.99188	0.00628	0.98633	0.00337
8.41372	0.99483	0.00291	0.99189	0.00562	0.98635	0.00643
8.43486	0.99484	0.00153	0.9919	0.00369	0.98637	0.00329
8.456	0.99486	0.0044	0.99193	0.00631	0.98641	0.00573
8.47714	0.99487	0.00359	0.99195	0.00426	0.98645	0.00487
8.49828	0.99489	0.00396	0.99197	0.00458	0.98648	0.00759
8.51942	0.99489	0.00319	0.99198	0.00736	0.9865	0.00466
8.54056	0.99491	0.00253	0.992	0.00344	0.98654	0.00648
8.5617	0.99492	0.00351	0.99203	0.00654	0.98658	0.00557
8.58284	0.99494	0.00374	0.99205	0.00347	0.98662	0.00919
8.60398	0.99494	0.00401	0.99205	0.00295	0.98662	0.00608
8.62512	0.99495	0.00488	0.99207	0.0037	0.98666	0.00487
8.64626	0.99497	0.001	0.9921	0.00646	0.9867	0.00668
8.6674	0.99498	0.00349	0.99212	0.00844	0.98674	0.00859
8.68854	0.99499	0.00301	0.99213	0.00838	0.98675	0.00506
8.70968	0.995	0.00207	0.99214	0.00526	0.98678	0.01119
8.73082	0.99501	0.00346	0.99217	0.00213	0.98681	0.00613
8.75196	0.99503	0.00265	0.99219	0.00241	0.98685	0.00508
8.7731	0.99504	0.0049	0.99221	0.00474	0.98688	0.00332
8.79424	0.99504	0.00401	0.99221	0.00289	0.98689	0.00597
8.81538	0.99506	0.00724	0.99224	0.0022	0.98693	0.00573
8.83652	0.99507	0.0061	0.99226	0.00313	0.98697	0.0073
8.85766	0.99509	0.00405	0.99228	0.00347	0.98701	0.0061
8.8788	0.99509	0.00537	0.99228	0.00313	0.98701	0.00518
8.89994	0.9951	0.00457	0.9923	0.00319	0.98704	0.00403
8.92108	0.99511	0.00253	0.99233	0.00837	0.98708	0.00362
8.94222	0.99513	0.00371	0.99235	0.0069	0.98712	0.00602
8.96336	0.99513	0.0049	0.99235	0.0022	0.98713	0.01136
8.9845	0.99514	0.00451	0.99237	0.00231	0.98715	0.00508
9.00564	0.99516	0.00282	0.99239	0.00405	0.98719	0.00993
9.02678	0.99517	0.00505	0.99241	0.00451	0.98723	0.00695
9.04792	0.99518	0.00267	0.99243	0.00591	0.98725	0.00736
9.06906	0.99518	0.00179	0.99243	0.0025	0.98726	0.00957
9.0902	0.9952	0.00544	0.99246	0.004	0.9873	0.00337
9.11134	0.99521	0.00305	0.99248	0.0043	0.98734	0.00317
9.13248	0.99523	0.00551	0.9925	0.00226	0.98737	0.00472
9.15362	0.99524	0.00566	0.99252	0.00688	0.98741	0.00489
9.17476	0.99525	0.00476	0.99254	0.00461	0.98744	0.00152
9.1959	0.99527	0.00254	0.99256	0.00381	0.98748	0.00476
9.21704	0.99527	0.00541	0.99257	0.00688	0.98749	0.0057
9.23818	0.99528	0.00275	0.99258	0.00251	0.98751	0.0032
9.25932	0.99529	0.0043	0.9926	0.00283	0.98755	0.00354
9.28046	0.99531	0.00221	0.99262	0.00518	0.98758	0.00469
9.3016	0.99531	0.00448	0.99264	0.00272	0.9876	0.00582
9.32274	0.99532	0.0035	0.99264	0.00447	0.98762	0.00622
9.34388	0.99533	0.00326	0.99266	0.00637	0.98765	0.00338
9.36502	0.99535	0.00616	0.99268	0.01031	0.98768	0.01353
9.38616	0.99536	0.00336	0.9927	0.000791338	0.98772	0.00471
9.4073	0.99536	0.00281	0.9927	0.00545	0.98772	0.01636
9.42844	0.99537	0.00234	0.99272	0.00532	0.98775	0.0077
9.44958	0.99538	0.00475	0.99274	0.0042	0.98779	0.01118
9.47072	0.9954	0.00691	0.99276	0.00706	0.98782	0.00995
9.49186	0.9954	0.00565	0.99277	0.0119	0.98783	0.00501
9.513	0.99541	0.00377	0.99278	0.00459	0.98785	0.00224
9.53414	0.99542	0.00326	0.9928	0.00667	0.98788	0.00252
9.55528	0.99543	0.00298	0.99282	0.00835	0.98792	0.00293
9.57642	0.99544	0.00252	0.99284	0.00354	0.98794	0.00363
9.59756	0.99545	0.0019	0.99284	0.0054	0.98795	0.00198
9.6187	0.99546	0.00217	0.99286	0.00504	0.98798	0.00237
9.63984	0.99547	0.00363	0.99288	0.00285	0.98801	0.00324
9.66098	0.99548	0.00461	0.9929	0.00326	0.98805	0.00624
9.68212	0.99548	0.00387	0.9929	0.00236	0.98805	0.00254
9.70326	0.9955	0.00155	0.99292	0.00395	0.98808	0.00526
9.7244	0.99551	0.00543	0.99294	0.00117	0.98811	0.00398
9.74554	0.99552	0.00228	0.99296	0.00325	0.98814	0.00771
9.76668	0.99552	0.00814	0.99296	0.0029	0.98815	0.00591
9.78782	0.99553	0.00519	0.99298	0.00408	0.98817	0.0059
9.80896	0.99554	0.00379	0.99299	0.0048	0.9882	0.004
9.8301	0.99556	0.00433	0.99301	0.00287	0.98823	0.01158
9.85124	0.99556	0.00177	0.99302	0.0048	0.98825	0.00437
9.87238	0.99557	0.00234	0.99303	0.00618	0.98827	0.01048
9.89352	0.99558	0.00431	0.99305	0.00357	0.9883	0.00438
9.91466	0.99559	0.00399	0.99307	0.00436	0.98833	0.00562
9.9358	0.9956	0.00329	0.99308	0.00557	0.98836	0.0029
9.95694	0.9956	0.00214	0.99308	0.00326	0.98836	0.00813
9.97808	0.99561	0.00252	0.9931	0.00331	0.98839	0.0038
9.99922	0.99563	0.00183	0.99312	0.00463	0.98842	0.0091
10.0204	0.99564	0.00515	0.99314	0.00416	0.98845	0.00754
10.0415	0.99564	0.00571	0.99314	0.00577	0.98846	0.00855
10.0626	0.99565	0.00447	0.99316	0.00471	0.98848	0.00397
10.0838	0.99566	0.00356	0.99317	0.00325	0.98851	0.00579
10.1049	0.99567	0.0021	0.99319	0.00168	0.98854	0.0036
10.1261	0.99568	0.00352	0.9932	0.0028	0.98855	0.00289
10.1472	0.99568	0.00593	0.99321	0.00249	0.98856	0.0032
10.1683	0.99569	0.00409	0.99323	0.00731	0.98859	0.00621
10.1895	0.9957	0.00282	0.99324	0.00289	0.98862	0.00329
10.2106	0.99572	0.00182	0.99326	0.00436	0.98865	0.00375
10.2318	0.99572	0.00493	0.99326	0.00434	0.98865	0.00492
10.2529	0.99573	0.00718	0.99328	0.00794	0.98868	0.00331
10.274	0.99574	0.0015	0.99329	0.00509	0.98871	0.00672
10.2952	0.99575	0.00458	0.99331	0.0052	0.98874	0.00676
10.3163	0.99575	0.00303	0.99332	0.00119	0.98875	0.00413
10.3375	0.99576	0.00255	0.99333	0.00216	0.98877	0.008
10.3586	0.99577	0.00474	0.99335	0.00635	0.98879	0.00321
10.3797	0.99578	0.00288	0.99336	0.00217	0.98882	0.00966
10.4009	0.99579	0.00726	0.99337	0.00319	0.98884	0.00636
10.422	0.99579	0.00349	0.99338	0.00381	0.98885	0.00427
10.4432	0.9958	0.00402	0.99339	0.00542	0.98888	0.00399
10.4643	0.99581	0.00252	0.99341	0.00213	0.9889	0.01019
10.4854	0.99582	0.000964252	0.99343	0.00219	0.98893	0.00429
10.5066	0.99582	0.00132	0.99343	0.00251	0.98893	0.00596
10.5277	0.99583	0.00169	0.99344	0.00235	0.98896	0.0061
10.5489	0.99584	0.00698	0.99346	0.0046	0.98899	0.00562
10.57	0.99585	0.00288	0.99348	0.00577	0.98901	0.00697
10.5911	0.99586	0.00231	0.99348	0.00229	0.98902	0.00794
10.6123	0.99586	0.0038	0.99349	0.00254	0.98904	0.00878
10.6334	0.99587	0.00298	0.99351	0.00527	0.98907	0.00372
10.6546	0.99588	0.00611	0.99352	0.000800928	0.98909	0.00403
10.6757	0.99589	0.00103	0.99353	0.00268	0.98911	0.00424
10.6968	0.99589	0.00411	0.99354	0.00232	0.98912	0.00559
10.718	0.9959	0.00338	0.99356	0.00358	0.98915	0.00782
10.7391	0.99591	0.00158	0.99357	0.00557	0.98917	0.00653
10.7603	0.99592	0.00218	0.99359	0.00403	0.9892	0.00548
10.7814	0.99592	0.00294	0.99359	0.00369	0.9892	0.00271
10.8025	0.99593	0.00682	0.9936	0.00681	0.98923	0.00678
10.8237	0.99594	0.00348	0.99362	0.00331	0.98925	0.00703
10.8448	0.99595	0.00345	0.99363	0.00359	0.98928	0.00401
10.866	0.99596	0.00369	0.99364	0.00495	0.98928	0.00311
10.8871	0.99596	0.00252	0.99365	0.00541	0.9893	0.01106
10.9082	0.99597	0.0021	0.99366	0.00506	0.98933	0.01066
10.9294	0.99598	0.00176	0.99368	0.00522	0.98935	0.00766
10.9505	0.99599	0.00189	0.99369	0.00171	0.98937	0.00639
10.9717	0.99599	0.00373	0.99369	0.00324	0.98938	0.00365
10.9928	0.996	0.00425	0.99371	0.00539	0.9894	0.00622
11.0139	0.99601	0.00279	0.99372	0.00389	0.98943	0.00934
11.0351	0.99602	0.00343	0.99374	0.00256	0.98945	0.00762
11.0562	0.99602	0.00306	0.99374	0.00425	0.98945	0.00439
11.0774	0.99603	0.00385	0.99375	0.00349	0.98948	0.00901
11.0985	0.99604	0.00389	0.99377	0.00344	0.9895	0.0028
11.1196	0.99605	0.0023	0.99378	0.00702	0.98953	0.00411
11.1408	0.99605	0.00326	0.99379	0.00406	0.98953	0.00673
11.1619	0.99606	0.00121	0.9938	0.00497	0.98955	0.0091
11.1831	0.99607	0.00539	0.99381	0.00283	0.98958	0.01365
11.2042	0.99608	0.00312	0.99383	0.00404	0.9896	0.01535
11.2253	0.99608	0.00287	0.99383	0.00315	0.98961	0.02124
11.2465	0.99609	0.00166	0.99384	0.00444	0.98962	0.02216
11.2676	0.9961	0.00572	0.99385	0.00393	0.98965	0.01826
11.2888	0.99611	0.0052	0.99387	0.00549	0.98967	0.01108
11.3099	0.99611	0.00366	0.99388	0.00217	0.98969	0.00574
11.331	0.99611	0.00817	0.99388	0.000983316	0.9897	0.0037
11.3522	0.99612	0.00356	0.9939	0.00182	0.98972	0.00482
11.3733	0.99613	0.00269	0.99391	0.00424	0.98974	0.00314
11.3945	0.99614	0.00281	0.99392	0.00197	0.98977	0.00737
11.4156	0.99614	0.00256	0.99393	0.00544	0.98977	0.00848
11.4367	0.99615	0.00275	0.99394	0.00184	0.98979	0.00665
11.4579	0.99616	0.00422	0.99395	0.00118	0.98981	0.01164
11.479	0.99617	0.00213	0.99397	0.00298	0.98984	0.00834
11.5002	0.99617	0.00214	0.99397	0.00257	0.98985	0.01167
11.5213	0.99618	0.00382	0.99398	0.00567	0.98986	0.0048
11.5424	0.99619	0.00284	0.99399	0.00377	0.98988	0.00705
11.5636	0.99619	0.00357	0.99401	0.00203	0.98991	0.00471
11.5847	0.9962	0.00407	0.99402	0.00192	0.98993	0.00953
11.6059	0.9962	0.00349	0.99402	0.00472	0.98993	0.00462
11.627	0.99621	0.00636	0.99403	0.00315	0.98995	0.00849
11.6481	0.99622	0.00591	0.99405	0.00405	0.98997	0.0082
11.6693	0.99623	0.00329	0.99406	0.00615	0.99	0.00434
11.6904	0.99623	0.00756	0.99406	0.00466	0.99	0.00396
11.7116	0.99624	0.00215	0.99407	0.00276	0.99002	0.00691
11.7327	0.99625	0.00389	0.99409	0.0028	0.99004	0.00938
11.7538	0.99625	0.00452	0.9941	0.00597	0.99006	0.00401
11.775	0.99626	0.00471	0.99411	0.0044	0.99007	0.00685
11.7961	0.99626	0.00309	0.99411	0.00646	0.99008	0.00614
11.8173	0.99627	0.00246	0.99413	0.00328	0.99011	0.00458
11.8384	0.99628	0.00546	0.99414	0.00543	0.99013	0.00535
11.8595	0.99629	0.00191	0.99415	0.00771	0.99015	0.00571
11.8807	0.99629	0.00252	0.99415	0.00308	0.99015	0.00786
11.9018	0.9963	0.00178	0.99416	0.00426	0.99017	0.00939
11.923	0.9963	0.00345	0.99418	0.00264	0.99019	0.00384
11.9441	0.99631	0.00561	0.99419	0.00314	0.99021	0.00276
11.9652	0.99631	0.00124	0.99419	0.00454	0.99022	0.00984
11.9864	0.99632	0.00325	0.9942	0.00515	0.99024	0.00995
12.0075	0.99633	0.00475	0.99422	0.00593	0.99026	0.00376
12.0287	0.99634	0.00376	0.99423	0.01929	0.99028	0.00219
12.0498	0.99634	0.00468	0.99423	0.00828	0.99029	0.00333
12.0709	0.99634	0.00418	0.99424	0.00712	0.9903	0.00427
12.0921	0.99635	0.00365	0.99425	0.0017	0.99032	0.00462
12.1132	0.99636	0.0019	0.99427	0.00435	0.99034	0.00294
12.1344	0.99637	0.00371	0.99428	0.00667	0.99036	0.00609
12.1555	0.99637	0.00383	0.99428	0.00329	0.99036	0.00365
12.1766	0.99638	0.0043	0.99429	0.00234	0.99038	0.00418
12.1978	0.99638	0.00297	0.9943	0.00304	0.9904	0.00769
12.2189	0.99639	0.00432	0.99431	0.00315	0.99042	0.00632
12.2401	0.99639	0.00399	0.99432	0.00164	0.99043	0.00685
12.2612	0.9964	0.00273	0.99433	0.0037	0.99044	0.00499
12.2823	0.99641	0.00234	0.99434	0.00208	0.99046	0.00364
12.3035	0.99641	0.00264	0.99435	0.00402	0.99048	0.008
12.3246	0.99642	0.00397	0.99436	0.00481	0.9905	0.00798
12.3458	0.99642	0.00264	0.99436	0.00137	0.9905	0.00609
12.3669	0.99643	0.00174	0.99437	0.00424	0.99052	0.00502
12.388	0.99644	0.00136	0.99439	0.00454	0.99054	0.00312
12.4092	0.99644	0.00304	0.9944	0.00578	0.99056	0.00406
12.4303	0.99645	0.00297	0.9944	0.00366	0.99056	0.00705
12.4515	0.99645	0.00434	0.99441	0.00365	0.99058	0.0042
12.4726	0.99646	0.00696	0.99442	0.00619	0.9906	0.00686
12.4937	0.99647	0.0051	0.99443	0.00333	0.99062	0.00518
12.5149	0.99647	0.00266	0.99444	0.00431	0.99063	0.0066
12.536	0.99648	0.00317	0.99445	0.00306	0.99064	0.00795
12.5572	0.99648	0.00401	0.99446	0.00493	0.99066	0.00401
12.5783	0.99649	0.00177	0.99447	0.00263	0.99068	0.00591
12.5994	0.99649	0.00431	0.99447	0.00203	0.99069	0.00222
12.6206	0.9965	0.0029	0.99448	0.00504	0.9907	0.00553
12.6417	0.9965	0.00193	0.99449	0.005	0.99072	0.00383
12.6629	0.99651	0.00235	0.9945	0.00567	0.99074	0.00481
12.684	0.99652	0.00322	0.99451	0.00319	0.99076	0.0039
12.7051	0.99652	0.00206	0.99451	0.00323	0.99076	0.00703
