# Supplementary material for: Exploring the role of macromolecular crowding and TNFR1 in cell volume control
Source: eLife journal article supplement (doi:10.7554/elife.92719), 2024-09-19
Supplement: fig3-data1 [file FigS3E.xlsx]

## Sheet: Sheet1
0-10	2020-10-01	20-30	30-40	40-50	50-60	60-70	70-80	80-90	90-100		0-10	2020-10-01	20-30	30-40	40-50	50-60	60-70	70-80	80-90	90-100
pre CytoD											post CytoD
74.7613	44.814	33.1828	28.3379	26.5366	22.6403	19.3623	17.4509	14.5571	11.3368		81.9433	57.7737	55.201	30.2655	27.5207	23.9013	22.0512	19.163	15.4539	10.5917
77.5539	53.33	42.8438	33.5152	27.5171	22.1149	19.7085	16.8027	12.8219	9.2223		77.741	63.8377	63.0278	37.62	36.6351	36.3965	30.5541	24.1485	20.641	19.4002
82.5144	59.4681	47.8132	38.4706	32.8458	26.3822	20.7805	16.2154	14.7736	12.921		89.5978	60.6673	38.3607	34.1151	27.5293	23.8734	21.5919	16.8833	16.0223	16.4849
89.693	65.7141	50.2713	37.0745	26.8121	20.4836	17.4351	15.6217	14.8703	15.4643		86.126	61.042	50.5487	37.986	29.926	26.9417	22.4156	15.4668	9.9794	10.906
68.223	39.0863	27.5651	22.1068	18.8936	17.0158	16.131	15.2487	16.3043	13.448		65.7415	50.0656	51.7853	20.1831	17.3279	12.756	19.5667	19.6693	25.3047	36.5438
75.1585	42.0812	28.7721	21.4676	16.7129	13.2883	11.6743	14.3267	14.526	16.9987		76.1539	46.7375	36.9947	31.012	29.2591	27.9532	24.1091	16.7073	15.1597	26.4083
80.5087	62.2634	50.7391	39.9831	33.2099	28.4305	21.4435	16.9147	12.3684	8.6453		80.5767	63.844	40.3346	48.588	39.2059	33.7849	31.9231	29.5045	24.3859	13.8569
70.8916	41.2346	37.525	30.3915	24.3218	18.2538	14.4279	13.3098	13.4273	15.3798		72.9472	34.3764	26.7649	23.0764	20.822	20.0639	18.842	19.3802	16.5454	14.7773
83.4885	51.5462	37.4418	25.4766	20.881	21.6028	21.5534	19.3389	22.9473	22.7673		90.8986	70.7861	59.1289	49.4414	40.6684	32.0837	24.0621	19.8508	14.124	14.4936
83.054	53.4328	37.4718	26.1492	18.2522	15.1148	9.2856	6.1272	3.9133	2.8486		68.2557	57.9813	61.9795	53.6596	27.4927	24.9385	19.6558	12.2556	7.4717	3.6113
80.4468	45.2339	30.9007	21.5662	18.7986	15.335	8.2469	3.1075	2.1138	3.4045		69.4923	66.4213	37.3786	27.9296	20.7801	16.3343	14.379	10.1382	4.0907	1.4641
86.7876	56.1521	36.161	25.9301	24.9565	25.6363	26.5715	22.7431	13.4821	10.9538		74.9285	55.31	41.9051	33.926	26.6483	20.4574	15.101	8.3042	3.2654	1.4025
80.798	51.9762	42.6322	35.3833	28.4274	24.9905	20.8792	18.3606	15.2878	10.2414		71.1985	47.7249	42.3014	38.5181	39.0076	32.0076	26.0729	29.5296	36.6848	17.0568
85.6991	46.6576	32.1788	23.3902	18.9931	16.5403	14.4931	9.0451	3.214	3.013		91.9225	68.8395	62.7239	57.1145	55.8417	57.8082	54.1944	41.4327	25.517	16.9947
89.2332	61.6247	53.5458	36.9326	26.7779	31.7324	37.1972	35.9698	30.5545	26.5569		79.2607	49.4041	39.0129	39.4187	40.5396	42.6159	38.01	33.141	27.6709	14.3484
97.8506	86.3137	80.0573	78.0052	69.1094	62.8606	42.834	34.4784	29.4365	34.5289		90.8632	83.0423	77.2349	67.8994	61.2149	55.2293	51.1891	43.0271	38.3794	33.9516
98.2546	85.0845	71.5863	55.2337	45.721	45.3568	36.3009	28.8076	21.943	19.0771		83.0711	71.8679	67.7232	60.546	57.5358	48.8853	32.299	15.7177	8.2855	4.3395
76.77	75.7429	59.4693	49.593	37.1283	31.0483	22.4718	15.5665	15.3719	11.393		96.1801	66.2659	53.6182	48.3736	40.6339	33.0397	22.2947	20.4868	4.7728	11.5595
85.158	57.3847	44.9437	39.0244	32.1534	25.0715	18.1625	14.276	15.0289	16.6658		80.8444	62.9775	54.2153	48.694	41.5331	40.8091	38.435	34.46	29.4622	13.303
pre-Noco											post-Noco
77.2745	49.9425	37.1231	29.0038	24.1105	21.9195	17.9154	17.7969	30.1504	28.5236		77.9166	52.2937	55.4748	40.4713	45.1172	28.3329	45.6322	30.9236	15.1955	12.9738
77.1517	43.5314	33.6378	31.4928	28.2807	20.9603	16.2122	10.4065	7.6473	5.9162		69.9063	42.0097	54.0018	49.4637	24.9299	41.4304	18.3711	27.9967	23.267	21.7861
46.6163	12.8383	9.3088	7.2304	4.6371	3.1175	2.7696	2.6686	1.3981	2.0666		69.4198	55.8334	42.6846	42.9545	25.8507	40.6237	12.6011	16.4875	15.0946	23.9052
65.5246	33.8509	20.9945	15.5683	14.4396	13.3128	12.3717	15.6291	23.0949	14.4388		68.3775	61.8691	46.5957	36.9993	29.8535	43.8025	22.1928	28.7782	23.5012	12.9422
75.1504	58.7263	43.5501	33.0392	29.0046	21.5211	18.9651	15.9386	10.6405	10.6808		74.3086	55.9719	46.782	36.1532	32.5833	32.8539	28.6205	21.3675	29.5469	14.6738
76.589	59.9997	50.3634	40.5984	40.7196	41.7024	34.7149	28.0598	20.7431	18.8608		33.8509	20.9945	15.5683	14.4396	12.3128	12.3717	35.6291	23.0949	14.4388	15.6742
93.4624	78.1558	64.6061	50.577	39.6737	30.8213	28.9923	25.8727	20.7189	23.2289		58.7263	43.5501	33.0392	29.0046	21.5211	18.9651	15.9386	10.6405	10.6808	10.5586
84.1291	71.1698	57.4357	46.7325	41.5875	46.1476	37.5311	35.8681	30.9169	29.3273		57.5476	41.4546	33.3787	31.2631	44.156	23.3348	35.7064	47.6581	22.7018	8.9972
73.5248	57.9728	49.4356	47.9796	43.6114	40.0967	36.8958	29.9783	24.8521	17.7029		74.3638	58.4892	49.683	41.6607	54.4608	29.3438	26.1576	22.5554	16.9251	12.3769
82.8326	54.7316	42.0231	30.58	22.4206	16.6021	11.7056	9.6369	8.2188	7.0928		88.6964	69.7358	61.4789	51.6693	41.4913	31.9893	23.5007	18.3219	32.5634	7.417
pre-WFA											post-WFA
75.0626	47.2122	37.1276	33.317	31.7163	26.8506	24.9036	26.2481	24.7739	13.4969		77.9878	46.856	38.3091	31.2253	26.9084	22.2443	22.0004	18.2486	18.4706	15.6121
72.9328	49.6133	42.678	36.5644	31.2397	24.4608	21.5962	23.8431	28.4029	24.1155		75.5477	45.2295	40.4397	36.0923	33.4341	30.1973	26.5647	24.4479	21.1987	12.1158
74.179	41.6112	31.3147	27.3083	24.2769	21.9911	17.6998	15.8177	23.8541	24.6736		49.9425	37.1231	29.0038	24.1105	21.9195	17.9154	17.7969	30.1504	28.5236	0.2659
88.8039	60.0791	48.624	40.0931	32.931	27.376	23.6114	20.0954	18.6961	15.6568		43.5314	33.6378	31.4928	28.2807	20.9603	16.2122	10.4065	7.6473	5.9162	28.3715
72.6598	48.0701	45.5824	39.3998	32.7505	26.4148	21.8625	24.1647	18.3672	8.2765		12.8383	9.3088	7.2304	4.6371	3.1175	2.7696	2.6686	1.3981	2.0666	0.5539
82.4064	57.5476	41.4546	33.3787	31.2631	24.156	23.3348	35.7064	47.6581	32.7018		77.1831	57.2517	46.4952	41.1676	42.306	40.7317	34.8326	28.41	25.6586	19.3305
75.7558	49.8171	43.3112	35.0735	27.3178	19.2339	15.2323	12.3543	9.3728	12.7339		87.7981	69.8774	66.8461	59.3385	50.7428	42.8446	34.5636	30.5723	26.1566	15.2963
48.8466	14.839	10.7859	8.4765	6.7436	4.3528	2.6968	1.6232	1.2631	2.0602		82.0226	66.58	58.9888	49.1739	39.8463	34.4755	29.9475	31.1222	29.335	26.135
73.5248	57.9728	49.4356	47.9796	43.6114	40.0967	36.8958	29.9783	24.8521	17.7029		74.3638	58.4892	49.683	41.6607	34.4608	29.3438	26.1576	22.5554	16.9251	12.3769
82.8326	54.7316	42.0231	30.58	22.4206	16.6021	11.7056	9.6369	8.2188	7.0928		88.6964	69.7358	61.4789	51.6693	41.4913	31.9893	23.5007	18.3219	12.5634	5.417
