# Supplementary material for: Exploring the role of macromolecular crowding and TNFR1 in cell volume control
Source: eLife journal article supplement (doi:10.7554/elife.92719), 2024-09-19
Supplement: fig4-data1 [file elife-92719-fig4-data1-v2.zip]

## Sheet: Sheet1
Spread Area	rEGFP	CIRCULARITY
µm2
127.293	0.17689	0.37557
135.984	0.17523	0.48071
138.683	0.1767	0.53721
138.72	0.19356	0.58154
141.975	0.18358	0.51841
145.858	0.17437	0.46048
189.312	0.17217	0.5207
200.925	0.18489	0.64236
203.291	0.18124	0.48045
204.179	0.18104	0.43476
226.479	0.19005	0.66086
229.475	0.18274	0.3768
235.281	0.17918	0.5437
236.723	0.17885	0.34587
237.167	0.17205	0.51147
240.57	0.18522	0.47862
245.858	0.17963	0.49354
256.102	0.17738	0.52073
1456.58	0.1692	0.36043
258.765	0.17982	0.49798
259.43	0.1797	0.58984
263.018	0.17932	0.6206
263.055	0.17667	0.43427
266.42	0.17873	0.5515
268.676	0.1711	0.42939
271.376	0.17364	0.65256
275.999	0.19439	0.63705
282.433	0.17602	0.46114
284.763	0.17925	0.56667
288.055	0.19194	0.53241
292.53	0.1789	0.69847
293.676	0.17828	0.50739
302.663	0.17692	0.51773
303.217	0.17897	0.39882
304.956	0.16935	0.61274
305.399	0.17642	0.51326
306.102	0.18515	0.48493
310.836	0.18018	0.46525
310.91	0.17918	0.48961
315.607	0.17602	0.43813
316.05	0.1766	0.42603
316.975	0.17146	0.42108
1522.63	0.1725	0.51717
324.482	0.1714	0.41193
328.402	0.17999	0.64809
332.396	0.18213	0.40669
332.544	0.17981	0.47913
333.025	0.17968	0.39575
337.87	0.18902	0.50057
338.055	0.17644	0.50793
339.386	0.18846	0.50291
347.004	0.18585	0.61579
347.041	0.17759	0.43393
347.818	0.17269	0.38748
349.334	0.18151	0.64434
349.741	0.18488	0.55783
353.661	0.17409	0.34012
356.916	0.1837	0.46596
357.655	0.18006	0.50599
365.052	0.1757	0.59006
367.456	0.18732	0.50081
368.565	0.18281	0.42042
368.676	0.18051	0.45243
373.41	0.18138	0.59189
373.484	0.17098	0.51895
374.334	0.1724	0.35852
377.108	0.18946	0.44638
385.466	0.18081	0.62102
386.058	0.18396	0.51165
386.612	0.17476	0.45328
387.907	0.17574	0.34493
390.57	0.17386	0.64705
392.899	0.17831	0.56199
394.083	0.18253	0.58287
395.895	0.17455	0.49522
397.892	0.18477	0.56693
399.926	0.17441	0.41999
403.476	0.1778	0.41985
406.139	0.18438	0.48571
408.136	0.17827	0.32089
410.392	0.18635	0.4438
412.87	0.1797	0.53555
412.87	0.17924	0.45771
418.898	0.1729	0.54447
420.266	0.17667	0.40521
421.302	0.18304	0.61273
430.03	0.17986	0.48237
431.731	0.18101	0.41539
432.655	0.17587	0.42261
435.392	0.18548	0.54584
1636.13	0.16938	0.38033
438.462	0.18345	0.59184
440.089	0.18525	0.53033
442.012	0.18088	0.37196
445.784	0.18868	0.60019
446.561	0.17937	0.50158
446.967	0.17642	0.57602
450.666	0.17541	0.49197
450.777	0.18422	0.40249
451.664	0.18223	0.44958
453.624	0.1798	0.42055
454.253	0.18624	0.53876
455.473	0.18555	0.35347
457.138	0.17873	0.45698
460.688	0.17637	0.44408
460.799	0.1871	0.55554
466.05	0.18307	0.43081
466.79	0.17502	0.54874
472.041	0.17314	0.47444
473.336	0.18304	0.39949
474.519	0.17472	0.38878
474.852	0.17496	0.59155
474.963	0.1828	0.4771
476.109	0.18641	0.64878
477.293	0.16985	0.41938
477.737	0.18634	0.3482
479.216	0.17515	0.35982
480.399	0.18643	0.3947
483.321	0.1769	0.34828
483.58	0.17659	0.43959
484.135	0.17314	0.26505
486.464	0.18056	0.56603
486.945	0.17715	0.30751
489.016	0.17549	0.48722
489.941	0.16819	0.28023
493.972	0.1713	0.52594
494.527	0.1736	0.51222
496.561	0.18298	0.54621
496.598	0.17485	0.37648
497.633	0.17744	0.42569
500.37	0.18336	0.39955
500.888	0.17669	0.39174
502.589	0.17996	0.36428
503.698	0.17903	0.26077
504.438	0.17151	0.39125
507.396	0.17459	0.47225
509.8	0.17725	0.28411
513.646	0.17196	0.34307
516.087	0.1754	0.358
517.308	0.18053	0.43006
519.157	0.18048	0.44495
519.268	0.18428	0.40089
521.154	0.17979	0.4004
522.522	0.17534	0.64947
522.633	0.18662	0.42788
1728.66	0.17183	0.33209
530.141	0.17092	0.28057
532.175	0.18661	0.34549
533.321	0.18821	0.43027
535.318	0.17139	0.55106
536.354	0.17251	0.56116
538.277	0.18741	0.46444
540.57	0.17359	0.27486
540.902	0.18359	0.49801
541.309	0.18101	0.53852
542.197	0.18573	0.47379
545.673	0.17089	0.43899
545.784	0.1763	0.55501
546.08	0.17041	0.46335
548.114	0.17659	0.40612
549.704	0.17761	0.34377
557.766	0.17919	0.49514
560.133	0.17817	0.36339
562.352	0.18052	0.56626
563.203	0.1739	0.50792
1765.68	0.17355	0.35747
566.013	0.17616	0.40366
571.857	0.17566	0.38535
575.666	0.16948	0.23644
581.25	0.17178	0.52037
582.249	0.17041	0.40559
582.359	0.17383	0.54914
582.988	0.1914	0.42358
586.945	0.17699	0.35406
588.092	0.17928	0.42756
589.164	0.17504	0.39282
591.79	0.17861	0.51949
591.864	0.18164	0.26883
595.821	0.18079	0.5007
596.302	0.18057	0.24149
597.411	0.17898	0.26225
601.109	0.18037	0.53567
602.996	0.17136	0.45073
603.846	0.17279	0.35352
606.805	0.1733	0.46628
1810.32	0.17175	0.35075
612.278	0.16962	0.39716
612.574	0.1724	0.35437
614.904	0.17469	0.44369
615.607	0.17027	0.4684
616.938	0.17658	0.40504
1819.53	0.17326	0.46656
622.448	0.17774	0.48194
626.627	0.1757	0.34876
629.882	0.17583	0.421
630.843	0.17383	0.34532
630.843	0.1813	0.32374
632.618	0.1846	0.37229
633.469	0.17981	0.4024
638.905	0.18257	0.45597
639.756	0.17189	0.30103
645.044	0.17965	0.39675
648.299	0.17785	0.45553
649.63	0.18591	0.37647
650.555	0.17903	0.40614
652.959	0.16859	0.41547
658.284	0.18142	0.38815
658.987	0.17483	0.39577
661.354	0.17512	0.38194
661.649	0.17566	0.32723
665.052	0.179	0.49966
666.124	0.17464	0.45892
666.79	0.17883	0.34878
667.271	0.17901	0.51254
667.345	0.1738	0.33237
668.047	0.18048	0.39116
670.155	0.18161	0.28856
671.967	0.17975	0.3859
672.3	0.18068	0.40471
672.448	0.18243	0.4448
678.328	0.17907	0.56461
678.809	0.17838	0.36137
680.436	0.17227	0.4936
683.321	0.17454	0.33759
685.429	0.17356	0.47647
688.092	0.1834	0.39751
691.494	0.18076	0.49147
693.787	0.17654	0.50781
697.189	0.17392	0.33158
700.629	0.18442	0.40733
708.506	0.17343	0.40137
710.873	0.17344	0.37059
711.243	0.17814	0.34319
712.093	0.17216	0.35914
713.499	0.17418	0.37503
713.979	0.17308	0.42596
715.015	0.17347	0.33116
716.309	0.17665	0.31459
720.636	0.16986	0.29654
729.401	0.17594	0.40247
731.139	0.18052	0.37486
731.842	0.1737	0.28948
736.834	0.17762	0.4935
737.426	0.1771	0.31799
738.166	0.17504	0.32501
739.016	0.17625	0.48523
739.793	0.1791	0.21498
742.456	0.16963	0.39937
744.527	0.16961	0.4828
745.599	0.16956	0.36367
749.223	0.18431	0.30295
752.959	0.1777	0.40845
754.808	0.17023	0.42105
767.012	0.172	0.26877
767.936	0.17261	0.46372
768.047	0.17452	0.48362
770.266	0.17279	0.48882
771.487	0.18355	0.40513
772.892	0.17321	0.31544
774.963	0.17526	0.41789
778.143	0.16887	0.34049
780.547	0.18023	0.40666
786.354	0.17101	0.33888
786.834	0.17636	0.40223
788.203	0.17907	0.35106
789.793	0.17076	0.33304
797.263	0.16919	0.38305
802.515	0.17565	0.3634
803.291	0.17461	0.43345
811.465	0.17762	0.47421
819.157	0.17516	0.25544
819.785	0.17573	0.32813
823.41	0.17272	0.35485
828.328	0.17868	0.26148
831.102	0.17123	0.45434
832.692	0.17564	0.2528
843.195	0.17573	0.51593
851.405	0.17178	0.29384
853.402	0.18045	0.41178
857.027	0.17735	0.5076
857.285	0.17716	0.36502
862.759	0.1724	0.39423
865.052	0.17389	0.3389
2079.99	0.17239	0.39273
882.285	0.16941	0.40273
888.72	0.17204	0.26065
891.383	0.16888	0.43612
891.494	0.17541	0.36761
892.678	0.1725	0.40955
893.935	0.17366	0.3624
895.673	0.1777	0.21972
901.553	0.17726	0.46082
904.142	0.17629	0.27459
907.951	0.17142	0.33933
911.465	0.17515	0.24229
912.907	0.17044	0.20808
914.904	0.17966	0.25417
916.309	0.18093	0.3241
917.271	0.18072	0.20685
919.97	0.17437	0.33284
921.783	0.17346	0.32469
927.071	0.17001	0.4228
928.18	0.17747	0.33952
931.805	0.17097	0.1697
937.685	0.17645	0.41951
951.701	0.17572	0.37371
954.549	0.17202	0.38448
963.166	0.17474	0.29051
975	0.17547	0.50347
977.367	0.17442	0.41129
980.917	0.17286	0.34867
984.763	0.17412	0.35901
997.966	0.17435	0.44932
1004.77	0.17347	0.44417
1017.6	0.17999	0.37734
1018.31	0.17334	0.50976
1040.57	0.1761	0.35305
1042.01	0.16815	0.38093
1056.58	0.17477	0.27507
1056.88	0.17618	0.43897
1059.58	0.17783	0.38193
1061.21	0.17264	0.14589
1110.02	0.1768	0.30873
1144.71	0.16927	0.29543
1148.08	0.17482	0.33606
1165.16	0.17794	0.38929
1197.23	0.17791	0.34165
1222.08	0.17721	0.30529
1225.78	0.17228	0.14121
1227.26	0.17735	0.19468
1255.14	0.1775	0.23489
1281.32	0.16831	0.28168
1310.61	0.16924	0.29004
1314.64	0.17182	0.29759
1349.63	0.17104	0.1228
1412.43	0.17186	0.15235
1484.47	0.17561	0.34843
1492.53	0.17005	0.27681
1582.84	0.17065	0.12997
1713.46	0.16887	0.18836
1376.7	0.17732	0.25735
1529.73	0.17525	0.20406
1714.28	0.17446	0.24957
1746.89	0.17665	0.30404
1864.57	0.17485	0.14751
2022.04	0.16806	0.11005
