# Supplementary material for: Exploring the role of macromolecular crowding and TNFR1 in cell volume control
Source: eLife journal article supplement (doi:10.7554/elife.92719), 2024-09-19
Supplement: fig4-data1 [file Fig4C-ii.xlsx]

## Sheet: Sheet1
Fibronectin	PEG10%
Fib 2h	PEG 2h
0.171	0.192
0.172	0.2
0.181	0.194
0.181	0.205
0.191	0.166
0.172	0.176
0.182	0.185
0.187	0.189
0.168	0.191
0.181	0.188
0.184	0.194
0.173	0.179
0.191	0.189
0.194	0.19
0.185	0.207
0.186	0.203
0.183	0.206
0.163	0.203
0.172	0.152
0.175	0.203
0.168	0.186
0.165	0.192
0.178	0.191
0.176	0.21
0.182	0.206
0.184	0.2
0.179	0.205
0.185	0.205
0.185	0.201
0.164	0.195
0.188	0.165
0.181	0.187
0.19	0.204
0.182	0.191
0.151	0.194
0.176
0.165
0.194
0.192
0.184
0.166
0.191
0.181
0.179
0.197
0.171
0.185
0.164
0.153
0.166
0.179
0.173
0.171
0.171
0.168
0.186
0.181
0.166
0.173
0.151
0.186
0.174
0.168
0.173
0.166
0.168
0.166
0.15
0.151
0.201
0.178
0.178
0.167
0.157
0.194
0.182
0.169
0.154
0.17
0.184
0.167
0.181
0.157
0.167
0.143
0.181
0.157
