# Supplementary material for: Exploring the role of macromolecular crowding and TNFR1 in cell volume control
Source: eLife journal article supplement (doi:10.7554/elife.92719), 2024-09-19
Supplement: fig4-data1 [file Fig4D-ii.xlsx]

## Sheet: Sheet1
Anisotropy	Anisotropy	Anisotropy	Anisotropy
Control	CytoD	Trypsin	CytoD +Trypsin
0.158	0.19609	0.191	0.197
0.17	0.19697	0.191	0.201
0.157	0.19676	0.195	0.199
0.162	0.19565	0.192	0.2
0.165	0.19724	0.195	0.2
0.164	0.19696	0.192	0.197
0.169	0.18591	0.188	0.196
0.173	0.19467	0.191	0.197
0.169	0.18826	0.188	0.193
0.169	0.18516	0.183	0.189
0.163	0.17502	0.188	0.192
0.166	0.1826	0.19	0.194
0.173	0.1845	0.19	0.197
0.166	0.19946	0.186	0.197
0.17	0.19338	0.193	0.2
0.163	0.19594	0.191	0.197
0.166	0.19912	0.195	0.198
0.173	0.19315	0.194	0.199
0.176	0.19757	0.191	0.193
0.171	0.19245	0.192	0.194
0.171	0.19963	0.191	0.191
0.176	0.19084	0.189	0.191
0.171	0.19151	0.189	0.192
0.173	0.19147	0.189	0.19
0.169	0.1901	0.185	0.188
0.167	0.18857	0.188	0.191
0.177	0.18945	0.182	0.189
0.181	0.18393	0.182	0.185
0.176	0.18241	0.184	0.189
0.168	0.18366	0.186	0.19
0.173	0.18347	0.185	0.188
0.177	0.18124	0.19	0.193
0.178	0.18308	0.19	0.191
0.178	0.17922	0.187	0.188
0.158	0.18116	0.188	0.188
0.168	0.17834	0.183	0.184
0.166	0.1935	0.182	0.182
0.168	0.18822	0.195	0.199
0.197	0.18779	0.196	0.195
0.197	0.18847	0.199	0.198
0.194	0.19188	0.195	0.197
0.195	0.19324	0.196	0.193
0.172	0.18541	0.195	0.192
0.175	0.18167	0.195	0.192
0.176	0.18172	0.194	0.191
0.178	0.1786	0.191	0.19
0.177	0.17927	0.189	0.188
0.169	0.18516	0.195	0.193
0.173	0.18318	0.196	0.196
0.172	--	0.196	0.196
0.172	--	0.198	0.197
0.165	--	0.193	0.194
0.197	--	0.192	0.194
0.195	--	0.19	0.193
0.183	--	0.191	0.192
0.175	--	0.187	0.189
0.185	--	0.196	0.196
0.178	--
0.186	--
0.186	--
0.16	--
0.173	--
0.188	--
0.182	--
0.182	--
0.187	--
0.187	--
0.175	--
0.166	--
0.161	--
0.177	--
0.186	--
0.163	--
0.16	--
0.163	--
0.189	--
0.158	--
0.177	--
0.183	--
0.176	--
0.165	--
0.175	--
0.19269	--
0.19294	--
0.19191	--
0.19143	--
0.18848	--
0.1958	--
0.17909	--
0.19253	--
0.18285	--
0.17849	--
0.17139	--
0.17424	--
0.18241	--
0.1902	--
0.18928	--
0.18483	--
0.18302	--
0.17832	--
0.17455	--
0.17831	--
0.18659	--
0.18054	--
0.17618	--
0.17729	--
0.17541	--
0.16899	--
0.1694	--
0.17088	--
0.16557	--
0.16774	--
0.17111	--
0.16923	--
0.16426	--
0.16353	--
0.16705	--
0.16473	--
0.17514	--
0.18109	--
0.18055	--
0.17923	--
0.18323	--
0.17638	--
0.17427	--
0.16728	--
0.16808	--
0.16055	--
0.17163	--
0.16727	--
0.1674	--
	--
	--
	--
	--
	--
	--
	--
	--
	--
