# Supplementary material for: Exploring the role of macromolecular crowding and TNFR1 in cell volume control
Source: eLife journal article supplement (doi:10.7554/elife.92719), 2024-09-19
Supplement: fig5-data1 [file elife-92719-fig5-data1-v2.zip]

## Sheet: Sheet1
	Ctrl	MG	Hec	Chx	HS			Cell Volume	Cell Volume	Cell Volume	Cell Volume
n=	132	98	132	90	132			%	%	%	%
	Control	MG132 (10µM, 4h)	Heclin (70µM,4h)	Cycloheximide (1µM,4h)	Heat Shock (42C,1h)			MG	Hec	Chx	HS
	0.161	0.19241	0.188	0.175	0.13			2.72597	-1.20987	-4.24318	-11.111
	0.169	0.17655	0.193	0.178	0.151			2.26127	0.04344	-3.13153	-13.0783
	0.166	0.17443	0.188	0.178	0.147			2.67223	-1.23724	-4.09723	-12.3008
	0.164	0.18918	0.184	0.177	0.158			5.53064	-0.18215	-2.75528	-11.852
	0.153	0.1893	0.184	0.169	0.155			3.33566	-1.4301	-3.87741	-11.2597
	0.131	0.19479	0.187	0.174	0.156			3.13425	-1.28426	-3.14035	-10.6323
	0.164	0.20434	0.193	0.17	0.157			2.93448	-1.44827	-3.93023	-11.4606
	0.15	0.19232	0.191	0.165	0.16			2.98174	0.000982034	-3.6274	-11.2133
	0.167	0.1838	0.189	0.165	0.159			3.73055	-1.7707	-3.44859	-11.7501
	0.181	0.19373	0.184	0.181	0.154			3.71512	-0.98417	-3.07293	-10.8225
	0.162	0.20055	0.144	0.185	0.156			3.54693	-1.39274	-3.39205	-12.6796
	0.188	0.21334	0.145	0.176	0.166			2.73822	-0.77246	-3.54726	-12.8389
	0.183	0.19404	0.174	0.175	0.163			3.20411	-1.32976	-4.09843	-11.7276
	0.189	0.18656	0.177	0.17	0.159			2.95578	-2.24914	-3.50617	-10.4911
	0.149	0.18871	0.189	0.174	0.164			4.36055	-1.06047	-3.85396	-10.9423
	0.183	0.19663	0.163	0.171	0.16			2.5891	-2.12607	-4.10753	-11.8989
	0.185	0.18832	0.188	0.173	0.163			2.82084	-2.73489	-4.17484	-12.2794
	0.161	0.1646	0.191	0.176	0.157			3.90693	-1.65643	-3.40806	-11.6808
	0.186	0.1701	0.185	0.178	0.156			3.09256	-0.63311	-3.49652	-11.8448
	0.166	0.17747	0.186	0.169	0.127			3.19261	-1.02326	-3.34057
	0.185	0.17309	0.174	0.152	0.162			4.45446	-1.20232	-4.19049
	0.138	0.1638	0.171	0.171	0.151			3.14222	-0.69728	-3.78362
	0.181	0.18195	0.182	0.175	0.149				0.77295	-4.07124
	0.18	0.19218	0.184	0.153	0.155				-0.11652	-3.79495
	0.176	0.18416	0.172	0.174	0.159				-1.89565
	0.173	0.17807	0.181	0.173	0.163
	0.178	0.17286	0.175	0.163	0.162
	0.165	0.18736	0.176	0.15	0.151
	0.159	0.20522	0.182	0.161	0.159
	0.183	0.20883	0.177	0.178	0.156
	0.166	0.20284	0.154	0.17	0.163
	0.171	0.19615	0.172	0.172	0.157
	0.18	0.20288	0.181	0.175	0.149
	0.182	0.20089	0.192	0.175	0.16
	0.183	0.20814	0.188	0.151	0.149
	0.181	0.20635	0.197	0.165	0.164
	0.187	0.19993	0.167	0.16	0.166
	0.138	0.19873	0.168	0.154	0.158
	0.166	0.19921	0.163	0.155	0.164
	0.179	0.18212	0.163	0.181	0.16
	0.181	0.18343	0.165	0.181	0.161
	0.186	0.17238	0.165	0.172	0.162
	0.184	0.19867	0.172	0.171	0.16
	0.185	0.19497	0.166	0.163	0.161
	0.179	0.19582	0.171	0.171	0.158
	0.188	0.1885	0.192	0.171	0.164
	0.185	0.18351	0.195	0.169	0.16
	0.192	0.18263	0.192	0.176	0.159
	0.175	0.16516	0.172	0.177	0.155
	0.157	0.18578	0.19	0.171	0.158
	0.172	0.18004	0.189	0.16	0.161
	0.158	0.18057	0.192	0.167	0.16
	0.168	0.19196	0.19	0.179	0.166
	0.168	0.19322	0.188	0.153	0.164
	0.144	0.18932	0.183	0.175	0.153
	0.181	0.19657	0.183	0.177	0.159
	0.179	0.17851	0.177	0.176	0.162
	0.178	0.17808	0.186	0.156	0.159
	0.169	0.18659	0.189	0.168	0.16
	0.183	0.19483	0.187	0.181	0.142
	0.134	0.21161	0.19	0.174	0.128
	0.185	0.17921	0.181	0.173	0.158
	0.19	0.16974	0.175	0.176	0.146
	0.182	0.18985	0.167	0.177	0.147
	0.175	0.19304	0.181	0.156	0.162
	0.183	0.18263	0.18	0.165	0.157
	0.179	0.16083	0.18	0.163	0.15
	0.181	0.1672	0.186	0.162	0.163
	0.186	0.19303	0.182	0.16	0.155
	0.161	0.18519	0.191	0.181	0.161
	0.185	0.15789	0.184	0.184	0.162
	0.177	0.19643	0.191	0.173	0.157
	0.176	0.19302	0.178	0.175	0.16
	0.174	0.19676	0.178	0.166	0.156
	0.172	0.1839	0.173	0.172	0.138
	0.168	0.17979	0.186	0.176	0.148
	0.172	0.19495	0.177	0.171	0.147
	0.181	0.20828	0.189	0.173	0.129
	0.177	0.20644	0.189	0.176	0.151
	0.174	0.19945	0.194	0.174	0.148
	0.176	0.19738	0.188	0.156	0.155
	0.17	0.21335	0.195	0.169	0.158
	0.163	0.2138	0.19	0.18	0.147
	0.161	0.20584	0.18	0.156	0.158
	0.164	0.2129	0.161	0.178	0.151
	0.164	0.19156	0.166	0.176	0.157
	0.182	0.1979	0.166	0.175	0.165
	0.178	0.20039	0.179	0.156	0.16
	0.175	0.17811	0.184	0.167	0.163
	0.168	0.18336	0.185	0.179	0.164
	0.172	0.17732	0.183		0.162
	0.161	0.19397	0.194		0.16
	0.158	0.19841	0.19		0.164
	0.162	0.18774	0.195		0.16
	0.154	0.18792	0.193		0.158
	0.139	0.18657	0.199		0.16
	0.171	0.18509	0.195		0.148
	0.176	0.16479	0.19		0.155
	0.146		0.191		0.127
	0.169		0.19		0.146
	0.176		0.19		0.148
	0.157		0.195		0.163
	0.183		0.184		0.164
	0.185		0.18		0.157
	0.165		0.185		0.159
	0.181		0.185		0.16
	0.168		0.186		0.163
	0.156		0.168		0.151
	0.179		0.178		0.138
	0.186		0.188		0.149
	0.168		0.18		0.148
	0.162		0.191		0.155
	0.165		0.188		0.148
	0.172		0.185		0.149
	0.158		0.191		0.135
	0.183		0.176		0.141
	0.184		0.178		0.16
	0.178		0.169		0.17
	0.172		0.179		0.159
	0.164		0.185		0.162
	0.172		0.189		0.173
			0.194		0.179
			0.196		0.172
			0.191		0.169
			0.192		0.171
			0.191		0.162
			0.189		0.132
			0.186		0.165
			0.192		0.156
			0.188		0.154
			0.187		0.16
			0.18		0.156
