# Supplementary material for: Exploring the role of macromolecular crowding and TNFR1 in cell volume control
Source: eLife journal article supplement (doi:10.7554/elife.92719), 2024-09-19
Supplement: fig6-data1 [file elife-92719-fig6-data1-v2.zip]

## Sheet: Sheet1
Isotonic	TNFa	150mM	600mM	150mM	600mM	150mM	600mM
Nuclear fraction	Nuclear fraction	Nuclear fraction	Nuclear fraction	Nuclear fraction	Nuclear fraction	Nuclear fraction	Nuclear fraction
				w Zafirlukast	w Zafirlukast	TNFR1 kd	TNFR1 kd
0.18556	0.48485	0.46799	0.20295	0.23407	0.31812	0.24836	0.30744
0.22071	0.4466	0.43418	0.22866	0.27272	0.17445	0.17728	0.26359
0.29549	0.48243	0.42464	0.27215	0.3437	0.25519	0.23205	0.27036
0.348	0.5897	0.40982	0.24928	0.39861	0.23634	0.27288	0.27149
0.27554	0.39859	0.36653	0.16971	0.32635	0.27221	0.31855	0.29924
0.21665	0.3738	0.451	0.21094	0.26546	0.25989	0.19401	0.39175
0.2644	0.47391	0.46283	0.11314	0.31261	0.28221	0.18554	0.23376
0.22528	0.46075	0.55074	0.27809	0.27659	0.21404	0.198	0.27581
0.28361	0.59477	0.50752	0.27528	0.32812	0.34554	0.21551	0.23118
0.28063	0.57731	0.39414	0.30933	0.32924	0.23904	0.16901	0.22513
0.17618	0.50203	0.42152	0.28188	0.22179	0.32205	0.29296	0.22604
0.24462	0.45555	0.38023	0.31557	0.29033	0.21128	0.24379	0.38659
0.31894	0.43857	0.43318	0.19254	0.36945	0.23668	0.20895	0.26211
0.265	0.63592	0.39931	0.34156	0.31551	0.25807	0.26774	0.37689
0.24385	0.436	0.33827	0.23811	0.29286	0.28122	0.31424	0.33278
0.30173	0.61739	0.36874	0.30722	0.34874	0.29693	0.25575	0.28554
0.25291	0.49286	0.3349	0.24593	0.29892	0.28361	0.33896	0.43463
0.25485	0.51958	0.42494	0.32162	0.29986	0.35779	0.2992	0.31089
0.2252	0.48359	0.46849	0.44804	0.27181	0.30547	0.24519	0.44675
0.34201	0.46611	0.3897	0.24277	0.38972	0.26672	0.29935	0.47177
0.27412	0.44085	0.44496	0.28212	0.32523	0.26492	0.29786	0.20891
0.37706	0.43137	0.44668	0.43193	0.42947	0.28238	0.26391	0.22256
0.32682	0.47421	0.38934	0.40536	0.37273	0.28431	0.23007	0.21577
0.4752	0.45208	0.34083	0.40523	0.19188	0.3189	0.24882	0.1727
0.44721	0.42996	0.2915	0.42431	0.12558	0.22623	0.1784	0.24049
0.25157	0.46166	0.32268	0.29531	0.30208	0.20075	0.42404	0.27849
0.44558	0.40836	0.41746	0.33511	0.17301	0.21836	0.40329	0.25703
0.27266	0.49418	0.31242	0.34305	0.31967	0.20093	0.45701	0.21757
0.25483	0.49996	0.31765	0.36126	0.30514	0.27049	0.29558	0.22524
0.27196	0.52296	0.57998	0.31548	0.32147	0.2675	0.40198	0.17879
0.40911	0.50564	0.54633	0.45801	0.19612	0.24722	0.29631	0.26131
0.22899	0.49368	0.4666	0.26367	0.2751	0.28792	0.46735	0.1891
0.27621	0.40121	0.65021	0.4385	0.32642	0.28362	0.24425	0.21625
0.53433	0.42794	0.48506	0.27717	0.17186	0.28865	0.34767	0.22599
0.2542	0.32878	0.51205	0.36555	0.30161	0.31617	0.51482	0.37772
0.32445	0.42949	0.45033	0.31422	0.37186	0.24898	0.47491	0.23591
0.34786	0.43276	0.49673	0.39357	0.39317	0.33925	0.39775	0.2747
0.34217	0.3887	0.41388	0.29223	0.39358	0.29976	0.60807	0.20397
0.26034	0.46276	0.50096	0.35961	0.30715	0.26664	0.64354	0.28536
0.24392	0.44959	0.51401	0.43473	0.29303	0.27594	0.25553	0.28215
0.24768	0.38338	0.72237	0.33319	0.29869	0.25611	0.25505	0.24951
0.26002	0.46947	0.42872	0.22434	0.30853	0.22438	0.31834	0.2763
0.49681	0.53522	0.47108	0.34435	0.18762	0.28682	0.33433	0.39735
0.323	0.5798	0.49208	0.20171	0.36751	0.23174	0.35451	0.27846
0.30196	0.50041	0.55157	0.28197	0.35277	0.25917	0.30825	0.23946
0.34234	0.44838	0.47794	0.43091	0.39455	0.30393	0.23645	0.2669
0.23516	0.53722	0.53113	0.41964	0.28207	0.37485	0.37526	0.21824
0.36992	0.50601	0.38286	0.33105	0.41843	0.26975	0.26543	0.41903
0.44613	0.54583	0.60834	0.38321	0.13182	0.3691	0.23937	0.28167
0.23093	0.44891	0.45725	0.24765	0.28094	0.26897	0.22994	0.28292
0.32885	0.40113	0.44197	0.4737	0.37646	0.30485	0.28046	0.46651
0.3384	0.61492	0.38446	0.35556	0.38711	0.27561	0.27093	0.46236
0.45435	0.49612	0.45815	0.34919	0.18265	0.2933	0.30829	0.25214
0.26337	0.35774	0.45105	0.22307	0.31278	0.36593	0.3374	0.25346
0.29997	0.43371	0.41064	0.23738	0.35178	0.26979	0.39813	0.26553
0.23146	0.59007	0.36782	0.25403	0.27807	0.22865	0.31562	0.32646
0.16657	0.54403	0.33743	0.22232	0.21198	0.29222	0.30615	0.29205
0.22371	0.57627	0.40354	0.23476	0.26962	0.37838	0.35889	0.35388
0.31184	0.33832	0.45725	0.25322	0.35715	0.27808	0.30079	0.35989
0.26865	0.48235	0.45234	0.3843	0.31756	0.30645	0.32213	0.26617
0.23159	0.72728	0.4657	0.24244	0.2762	0.21983	0.26743	0.26575
0.2285	0.51737	0.4893	0.27105	0.27711	0.26879	0.36264	0.31466
0.21286	0.47578	0.33589	0.33079	0.25787	0.27996	0.31128	0.28827
0.21372	0.53405	0.49131	0.23932	0.25893	0.28354	0.28331	0.32605
0.25342	0.60968	0.36795	0.28993	0.30193	0.36708	0.22806	0.28755
0.18429	0.5271	0.3933	0.20628	0.2307	0.26993	0.31616	0.27289
0.18211	0.44872	0.39538	0.10013	0.22862	0.26998	0.21246	0.22589
0.18558	0.56643	0.35538	0.27432	0.23299	0.19656	0.3057	0.3515
0.20804	0.47139	0.40498	0.1972	0.26055	0.35963	0.27263	0.2209
0.19479	0.51957	0.40339	0.29382	0.2428	0.33031	0.36393	0.27116
0.24282	0.45774	0.35572	0.36805	0.28753	0.29208	0.34502	0.29488
0.13646	0.45556	0.50033	0.35691	0.18537	0.31693	0.40677	0.26255
0.21756	0.66303	0.3286	0.20541	0.26477	0.23346	0.33558	0.27285
0.18825	0.50135	0.30663	0.35153	0.23476	0.27512	0.20085	0.29965
0.27268	0.5886	0.4514	0.23747	0.32519	0.3554	0.20501	0.25208
0.21313	0.508	0.52633	0.30042	0.26314	0.31324	0.34308	0.3268
0.18713	0.47299	0.30008	0.30514	0.23784	0.33814	0.24613	0.27504
0.1786	0.53051	0.45661	0.27342	0.22471	0.25289	0.30774	0.20939
0.29073	0.45963	0.37559	0.24582	0.33744	0.36961	0.51543	0.2114
0.31181	0.41858	0.46448	0.17187	0.35822	0.23819	0.34094	0.28564
0.20936	0.61728	0.37629	0.26199	0.25747	0.27737	0.42149	0.29831
0.20857	0.49889	0.42575	0.28703	0.25668	0.25337	0.29729	0.33407
0.26691	0.49941	0.46963	0.25291	0.31922	0.28391	0.31313	0.28268
0.25602	0.54748	0.39698	0.25584	0.30323	0.36333	0.15656	0.32309
0.35584	0.40463	0.43782	0.22675	0.40085	0.31764	0.26819	0.42074
0.19373	0.6407	0.35061	0.24332	0.23884	0.24117	0.29219	0.40027
0.41049	0.58799	0.31783	0.35508	0.1774	0.35322	0.41239	0.40233
0.28972	0.62227	0.31007	0.31475	0.33733	0.35144	0.33093	0.38926
0.182	0.55	0.29505	0.3012	0.23391	0.3461	0.22846	0.34803
0.25803	0.58624	0.23645	0.23107	0.30844	0.34768	0.27456	0.3276
0.24591	0.50109	0.38221	0.3956	0.29502	0.38018	0.32314	0.30635
0.36071	0.64145	0.29218	0.29671	0.40612	0.29865	0.26369	0.31218
0.40547	0.64229	0.29533	0.28599	0.272	0.27887	0.34686	0.39043
0.22905	0.51705	0.57375	0.2896	0.27456	0.3276	0.24258	0.3173
0.27513	0.32589	0.42111	0.36998	0.32314	0.30635	0.41447	0.39709
0.21838	0.48049	0.47079	0.30451	0.26369	0.31218	0.39515	0.33954
0.29625	0.50108	0.5389	0.2243	0.34686	0.39043	0.27955	0.35206
0.19037	0.50142		0.67623	0.24258	0.3173	0.36446	0.38428
0.36976	0.66769		0.34217	0.41447	0.39709	0.22553	0.20642
0.34404	0.50561		0.32661	0.39515	0.33954	0.36475	0.34157
0.23104	0.49206		0.30012	0.27955	0.35206	0.27965	0.21823
0.11465	0.46488		0.22749	0.36446	0.38428	0.24423	0.22592
0.17622	0.47641		0.1977	0.22553	0.20642	0.31295	0.23234
0.31484	0.57976		0.283	0.36475	0.34157	0.25253	0.20202
0.23244	0.57479		0.28268	0.27965	0.21823	0.34725	0.37367
0.19172	0.62846		0.32297	0.24423	0.22592		0.27627
0.16404	0.57136		0.33686	0.31295	0.23234		0.2533
0.20452	0.57269		0.33629	0.25253	0.20202		0.278
0.29674	0.66664		0.35469	0.34725	0.37367		0.29994
	0.6268		0.30104		0.27627		0.27886
	0.60006		0.34785		0.2533		0.25755
	0.63624		0.26058		0.278		0.2513
	0.55193		0.28452		0.29994		0.32235
	0.51204		0.25093		0.27886		0.35847
	0.59726		0.32465		0.25755		0.28178
	0.57962		0.26003		0.2513		0.30619
	0.60764		0.23296		0.32235		0.30391
	0.61685		0.28708		0.35847		0.23413
	0.70393		0.28779		0.28178		0.24858
	0.53861		0.32552		0.30619		0.37806
	0.48006		0.31749		0.30391		0.35268
	0.52127		0.29176		0.23413		0.22713
	0.60061		0.28412		0.24858		0.3383
	0.51504		0.22514		0.37806
	0.58886				0.35268
	0.5656				0.22713
	0.55719				0.3383
	0.57657
	0.56458
	0.5313
	0.62993
