# Supplementary material for: Exploring the role of macromolecular crowding and TNFR1 in cell volume control
Source: eLife journal article supplement (doi:10.7554/elife.92719), 2024-09-19
Supplement: fig6-data1 [file Fig6C.xlsx]

## Sheet: Sheet1
HeLa				NIH/3T3
Control	Zafirlukast	TNFR1 KD		Control	Zafirlukast
3581.54	779.984	2939.18		3136.19	2904.17
1624.51	2139.89	1807.01		3675.26	3276.91
3965.37	2318.06	3937.67		4029.52	1218.53
2726.94	1425.09	1361.68		2821.25	4307.07
1348.16	2262.99	2126.5		3206.05	3528.75
2934.17	3190.06	2776.52		3842.17	1661.84
3065.84	2467.58	1780.27		3004.95	3331.36
2370.99	1438.06	863.606		3406.73	1832.45
3590.3	2780.88	1594.78		2742.23	3289.44
2470.48	1469.26	3317.66		2323.62	2958.64
2222.69	2533.78	2355.24		2564.75	3002.97
2107.72		2098.6		4690.33
1628.29				3172.52
				5531.03
				3418.52
				4637.67
