# Supplementary material for: Exploring the role of macromolecular crowding and TNFR1 in cell volume control
Source: eLife journal article supplement (doi:10.7554/elife.92719), 2024-09-19
Supplement: fig6-data1 [file FigS6C.xlsx]

## Sheet: Sheet1
HeLa				NIH/3T3
Control	Zafirlukast	TNFR1 KD		Control	Zafirlukast
0.1799	0.1804	0.18065		0.16863	0.20259
0.17289	0.16208	0.1765		0.17697	0.18198
0.18861	0.19864	0.16142		0.18417	0.17665
0.1623	0.16819	0.17021		0.17051	0.19874
0.19123	0.20984	0.17967		0.16354	0.17584
0.18736	0.15763	0.17942		0.1797	0.18538
0.20278	0.18892	0.17932		0.16797	0.19078
0.21075	0.18995	0.17639		0.17308	0.17779
0.1968	0.19606	0.15958		0.16435	0.17631
0.19157	0.17529	0.1741		0.1691	0.16192
0.19778	0.17152	0.19277		0.17536	0.19645
0.21993	0.19764	0.19159		0.16158	0.17016
0.20893	0.1726	0.16891		0.1847	0.17009
0.18323	0.19006	0.152		0.17738	0.19823
0.18176	0.17304	0.16766		0.17496	0.20401
0.18938	0.15186	0.15068		0.17138	0.20266
0.19131	0.19934	0.1325		0.18474	0.19131
0.18659	0.18919	0.19478		0.16898	0.18728
0.17633	0.18097	0.19799		0.17719	0.19355
0.17498	0.17968	0.18436		0.18094	0.18009
0.17736	0.17888	0.16457		0.17307	0.18857
0.18825	0.17465	0.18099		0.17248	0.20604
0.18832	0.1617	0.1913		0.17389	0.18598
0.17661	0.1986	0.18083		0.18578	0.18479
0.18911	0.19872	0.1835		0.17505	0.18137
0.19306	0.19291	0.19605		0.18575	0.17632
0.17622	0.19772	0.19473		0.17556	0.18801
0.16072	0.195	0.19637		0.18847	0.19001
0.16497	0.18732	0.19343		0.18486	0.17369
0.16451	0.16784	0.17709		0.17168	0.19347
0.18889	0.17758	0.19102		0.18264	0.19169
0.19282	0.19515	0.19445		0.1842	0.17212
0.1837	0.18611	0.19747		0.17528	0.17823
0.18532	0.18298	0.19787		0.14803	0.18967
0.18879	0.19121	0.16255		0.18511	0.17808
0.18184	0.18875	0.15949		0.17546	0.18404
0.17912	0.18034	0.19736		0.19333	0.18178
0.18908	0.19343	0.19957		0.18079	0.16556
0.18444	0.17113	0.17162		0.18278	0.19984
0.16163	0.18366	0.17224		0.17761	0.18393
0.1727	0.18061	0.16021		0.18576	0.1868
0.17197	0.20693	0.15189		0.17028	0.19518
0.18858	0.1492	0.17485		0.13765	0.17664
0.17451	0.1795	0.15084		0.18076	0.18697
0.1822	0.17499	0.19416		0.18502	0.20084
0.16796	0.18568	0.14099		0.18176	0.18977
0.15929	0.17865	0.19287		0.17531	0.1971
0.18336	0.20823	0.18958		0.18334	0.16754
0.16941	0.19127	0.17689		0.17431	0.19516
0.17366	0.17376	0.198		0.17489	0.1969
0.1788	0.1596	0.17331		0.16892	0.19205
0.19048	0.20184	0.20815		0.17836	0.18644
0.16581	0.17846	0.19471		0.18297	0.18538
0.16293	0.20529	0.16755		0.17962	0.18862
0.16178	0.1856	0.1777		0.18389	0.18042
0.16979	0.16829	0.16625		0.18335	0.18288
0.17212	0.15466	0.16744		0.17555	0.20569
0.16746	0.18581	0.18369		0.17409	0.22852
0.1692	0.17721	0.15356		0.17365	0.21162
0.15803	0.21576	0.19522		0.18002	0.15174
0.15883		0.16769		0.19153	0.17133
0.1898		0.18388		0.17653	0.19467
0.18652		0.17134		0.18193	0.19032
0.15852		0.16027		0.18065	0.18512
0.18203		0.19738		0.16354	0.19358
0.18227		0.19918		0.16151	0.18257
0.14094		0.18496		0.12707	0.19078
0.13588		0.20005		0.18512	0.18315
0.19685		0.18648		0.18863	0.17932
0.15016		0.20808		0.15982	0.20049
0.18467		0.17119		0.18168	0.19591
0.11106		0.16892		0.16274	0.16637
0.14354		0.17888		0.18263	0.18335
0.17778		0.18993		0.15081	0.20732
0.19005		0.17521		0.16573	0.1768
0.18933				0.16268	0.18263
0.17527				0.15523	0.18672
0.09889				0.18156	0.17685
0.1545				0.18317	0.19044
0.176				0.18261	0.18089
0.11336				0.15713	0.20089
0.18302				0.17983
0.18987				0.16877
0.17603				0.18447
0.17629				0.17687
0.17571				0.1813
0.17401				0.18014
0.14548				0.1314
0.15433				0.18098
0.15909				0.1699
0.11256				0.15996
0.10388				0.17947
0.15792				0.13984
0.17423				0.16811
0.10268				0.18716
0.17082				0.16794
0.19721				0.17936
0.15217				0.15986
0.15506				0.16463
0.14156				0.17882
0.18259				0.17625
0.14639				0.14105
0.15764				0.14294
0.1053				0.1808
0.16984				0.1681
0.16342				0.16632
0.16889				0.17046
0.14679				0.1704
0.14765				0.17127
0.16736				0.1607
0.1287				0.17443
0.12781				0.16972
0.12306				0.18356
0.15044				0.18904
0.18501				0.18889
0.15725				0.15839
0.17642				0.14971
0.1538				0.16769
0.14104				0.17625
0.0846				0.16416
0.13052				0.14395
0.18128				0.16045
0.11496				0.17143
0.09559				0.16221
0.1339				0.12142
0.12637				0.17108
0.16886				0.17626
0.14254				0.17361
0.13605				0.17169
0.11614				0.15609
0.18058				0.18373
0.17881				0.18838
				0.18958
				0.18834
				0.18021
				0.19274
				0.19044
				0.18718
				0.1897
				0.17428
				0.18151
				0.18817
				0.15973
				0.15625
				0.15549
				0.1808
				0.18461
				0.18482
				0.17832
				0.18278
				0.17224
				0.13928
