# Supplementary material for: Exploring the role of macromolecular crowding and TNFR1 in cell volume control
Source: eLife journal article supplement (doi:10.7554/elife.92719), 2024-09-19
Supplement: fig7-data1 [file elife-92719-fig7-data1-v2.zip]

## Sheet: Sheet1
HeLa					NIH/3T3
Untreated	Zafirlukast	TNFR1 KD	CAY10512		Untreated	Zafirlukast	CAY10512
-42.897	-25.9797	-28.1751	-34.938		-34.623	-16.709	-32.8937
-29.7298	-12.952	-16.8177	-37.5226		-37.0127	-20.2969	-28.3306
-35.6527	-16.8156	-22.4423	-30.1246		-37.0576	-13.9533	-26.0374
-41.3766	-13.5852	-31.0545	-33.5524		-32.7112	-13.9535	-33.0283
-38.0211	-20.3396	-23.6785	-37.1725		-33.5616	-28.1249	-25.6583
-35.5214	-16.6223	-5.62806	-32.934		-39.3046	-11.9267	-26.9239
-34.6335	-17.4338	-28.0579	-36.1887		-34.1629	-21.3976	-24.7464
-38.392	-14.6104	-18.106	-35.5623		-41.5453	-27.5414	-27.4973
-44.802	-23.9451	-27.5305	-31.1467		-41.6895	-9.79561	-28.5851
-29.1297	-23.4077	-9.35601	-36.2854		-34.1459	-13.84	-31.64
-36.1633	-24.3612	-23.2559	-29.2573		-35.1271	-4.76059	-31.6692
-27.9409		-11.6138	-30.7215		-38.6386		-27.5952
-41.326			-30.5547		-32.1654		-23.211
					-30.7787
					-37.9845
					-39.7058
